# Supplementary material for: Proteomics and disease network associations evaluation of environmentally relevant Bisphenol A concentrations in a human 3D neural stem cell model
Source: Front Cell Dev Biol. 2023 Aug 16;11:1236243. doi: 10.3389/fcell.2023.1236243 (PMC10472293; doi:10.3389/fcell.2023.1236243)
Supplement: Supplementary file 1 [file Table3.xlsx]

## Sheet: Suppl. Table S4A
Supplementary Table S4A: Proteins identified and quantified by LC-MS/MS-based proteomics
Gene names	Protein IDs	Majority protein IDs	Fasta headers	Unique peptides	Razor + unique peptides	Intensity	Intensity brain_D0_1	Intensity brain_D0_2	Intensity brain_D0_3	Intensity brain_D0_4	Intensity brain_D0_5	Intensity brain_D21_1	Intensity brain_D21_2	Intensity brain_D21_3	Intensity brain_D21_4	Intensity brain_D21_5	Intensity brain_D21_h1	Intensity brain_D21_h2	Intensity brain_D21_h4	Intensity brain_D21_h5	Intensity brain_D21_l1	Intensity brain_D21_l2	Intensity brain_D21_l3	Intensity brain_D21_l5	Intensity brain_D21_m1	Intensity brain_D21_m2	Intensity brain_D21_m4	Intensity brain_D21_m5	LFQ intensity brain_D0_1	LFQ intensity brain_D0_2	LFQ intensity brain_D0_3	LFQ intensity brain_D0_4	LFQ intensity brain_D0_5	LFQ intensity brain_D21_1	LFQ intensity brain_D21_2	LFQ intensity brain_D21_3	LFQ intensity brain_D21_4	LFQ intensity brain_D21_5	LFQ intensity brain_D21_h1	LFQ intensity brain_D21_h2	LFQ intensity brain_D21_h4	LFQ intensity brain_D21_h5	LFQ intensity brain_D21_l1	LFQ intensity brain_D21_l2	LFQ intensity brain_D21_l3	LFQ intensity brain_D21_l5	LFQ intensity brain_D21_m1	LFQ intensity brain_D21_m2	LFQ intensity brain_D21_m4
ACTG1	P63261	P63261	sp|P63261|ACTG_HUMAN Actin, cytoplasmic 2 OS=Homo sapiens OX=9606 GN=ACTG1 PE=1 SV=1	2	40	2477100000000	123730000000	106140000000	101990000000	118130000000	98443000000	120890000000	136370000000	115350000000	122020000000	115220000000	88907000000	133650000000	98773000000	95157000000	122830000000	124010000000	111690000000	79526000000	132130000000	129030000000	97107000000	106060000000	122430000000	118970000000	111550000000	118230000000	105870000000	131280000000	131830000000	156150000000	127910000000	137660000000	127710000000	154770000000	139770000000	130130000000	122280000000	140510000000	141820000000	140540000000	131240000000	137980000000	129950000000
	CON__P02769	CON__P02769		72	78	1387600000000	14565000000	248770000000	85805000000	15004000000	28907000000	76606000000	75300000000	33521000000	34344000000	39200000000	60638000000	53318000000	47141000000	45269000000	135390000000	33971000000	46947000000	31646000000	108580000000	41595000000	41164000000	89929000000	15213000000	311450000000	100230000000	15781000000	33147000000	85067000000	70053000000	41168000000	37373000000	45120000000	88331000000	58585000000	64703000000	60632000000	141360000000	37599000000	54442000000	49790000000	107800000000	44902000000	55806000000
TUBB4B	P68371	P68371	sp|P68371|TBB4B_HUMAN Tubulin beta-4B chain OS=Homo sapiens OX=9606 GN=TUBB4B PE=1 SV=1	2	38	829730000000	25454000000	18543000000	20740000000	26239000000	22610000000	41721000000	53425000000	45289000000	46279000000	48558000000	31468000000	46772000000	36377000000	34163000000	45338000000	45216000000	46605000000	24506000000	49909000000	47234000000	34617000000	38666000000	22241000000	19758000000	21235000000	23568000000	22778000000	43497000000	45727000000	56487000000	45721000000	51567000000	45404000000	49784000000	49967000000	45416000000	44019000000	47842000000	52566000000	41180000000	46225000000	48318000000	47653000000
HIST1H2BM;HIST1H2BN;HIST1H2BH;HIST2H2BF;HIST1H2BC;HIST1H2BD;HIST1H2BK;H2BFS;HIST1H2BL	Q99879;Q99877;Q93079;Q5QNW6;P62807;P58876;O60814;P57053;Q99880	Q99879;Q99877;Q93079;Q5QNW6;P62807;P58876;O60814;P57053;Q99880	sp|Q99879|H2B1M_HUMAN Histone H2B type 1-M OS=Homo sapiens OX=9606 GN=H2BC14 PE=1 SV=3;sp|Q99877|H2B1N_HUMAN Histone H2B type 1-N OS=Homo sapiens OX=9606 GN=H2BC15 PE=1 SV=3;sp|Q93079|H2B1H_HUMAN Histone H2B type 1-H OS=Homo sapiens OX=9606 GN=H2BC9 PE=1 S	4	13	740930000000	25306000000	26426000000	18575000000	23013000000	18237000000	35872000000	45938000000	41514000000	39016000000	37401000000	18684000000	51016000000	38300000000	31497000000	30535000000	40277000000	35771000000	27692000000	43292000000	41505000000	35562000000	35501000000	21734000000	29127000000	20090000000	21936000000	20601000000	37352000000	37649000000	48289000000	38685000000	42835000000	46521000000	50733000000	58456000000	47151000000	37276000000	42128000000	40121000000	64965000000	35349000000	41292000000	51497000000
TUBA1B	P68363;Q9H853	P68363	sp|P68363|TBA1B_HUMAN Tubulin alpha-1B chain OS=Homo sapiens OX=9606 GN=TUBA1B PE=1 SV=1	0	40	721500000000	23537000000	15300000000	18477000000	24249000000	19621000000	35624000000	46440000000	41262000000	43306000000	41530000000	25051000000	43766000000	31481000000	29632000000	38462000000	39203000000	38262000000	21371000000	40668000000	39975000000	30290000000	33996000000	22890000000	18409000000	21199000000	23770000000	22672000000	39810000000	42586000000	51246000000	45986000000	46957000000	33099000000	45658000000	43087000000	39129000000	39378000000	43152000000	43769000000	31798000000	38488000000	42961000000	39313000000
HSP90AB1	P08238;Q58FF7	P08238	sp|P08238|HS90B_HUMAN Heat shock protein HSP 90-beta OS=Homo sapiens OX=9606 GN=HSP90AB1 PE=1 SV=4	38	68	628700000000	48826000000	29835000000	37266000000	45820000000	39400000000	26933000000	30896000000	20823000000	27787000000	25128000000	20876000000	26599000000	20972000000	22275000000	28642000000	26614000000	24396000000	19999000000	32176000000	28151000000	21605000000	23678000000	49640000000	37388000000	44658000000	47657000000	44579000000	29970000000	28716000000	26462000000	29104000000	28089000000	30461000000	28850000000	29140000000	29608000000	29671000000	29497000000	29296000000	29025000000	32511000000	30919000000	30155000000
HIST2H2AA3;HIST1H2AJ;HIST1H2AH;HIST2H2AC;HIST1H2AG;H2AFJ	Q6FI13;Q99878;Q96KK5;Q16777;P0C0S8;Q9BTM1	Q6FI13;Q99878;Q96KK5;Q16777;P0C0S8;Q9BTM1	sp|Q6FI13|H2A2A_HUMAN Histone H2A type 2-A OS=Homo sapiens OX=9606 GN=H2AC19 PE=1 SV=3;sp|Q99878|H2A1J_HUMAN Histone H2A type 1-J OS=Homo sapiens OX=9606 GN=H2AC14 PE=1 SV=3;sp|Q96KK5|H2A1H_HUMAN Histone H2A type 1-H OS=Homo sapiens OX=9606 GN=H2AC12 PE=1	1	10	564820000000	21902000000	28742000000	16410000000	21260000000	19139000000	25699000000	33516000000	21769000000	26221000000	24467000000	25232000000	38668000000	25016000000	22311000000	33226000000	29199000000	25026000000	14266000000	34399000000	29972000000	23981000000	24398000000	22357000000	31946000000	19655000000	19606000000	22904000000	29922000000	31411000000	31310000000	27689000000	30564000000	41132000000	44483000000	36681000000	35164000000	32023000000	32109000000	30353000000	29284000000	33729000000	32881000000	36110000000
GAPDH	P04406;O14556	P04406	sp|P04406|G3P_HUMAN Glyceraldehyde-3-phosphate dehydrogenase OS=Homo sapiens OX=9606 GN=GAPDH PE=1 SV=3	36	36	544100000000	29966000000	19548000000	23159000000	30261000000	25182000000	24481000000	34551000000	25403000000	28386000000	26949000000	17564000000	27159000000	19630000000	18824000000	24045000000	30772000000	24910000000	14303000000	31352000000	25899000000	19887000000	21870000000	28977000000	20897000000	25856000000	28829000000	27182000000	25847000000	30295000000	33674000000	29534000000	33775000000	27249000000	29407000000	30202000000	27536000000	24043000000	31402000000	28715000000	24282000000	29277000000	27430000000	27740000000
EEF1A1;EEF1A1P5	P68104;Q5VTE0	P68104;Q5VTE0	sp|P68104|EF1A1_HUMAN Elongation factor 1-alpha 1 OS=Homo sapiens OX=9606 GN=EEF1A1 PE=1 SV=1;sp|Q5VTE0|EF1A3_HUMAN Putative elongation factor 1-alpha-like 3 OS=Homo sapiens OX=9606 GN=EEF1A1P5 PE=5 SV=1	22	36	531770000000	30194000000	19808000000	26767000000	32245000000	27572000000	25241000000	27154000000	22373000000	27206000000	24941000000	17610000000	25828000000	19677000000	19888000000	28459000000	25311000000	22898000000	14059000000	29928000000	23559000000	18618000000	22436000000	32283000000	22286000000	30996000000	31478000000	28871000000	27822000000	26483000000	29837000000	28778000000	29679000000	27504000000	30134000000	28617000000	26095000000	27339000000	27490000000	27629000000	24298000000	27335000000	26489000000	25750000000
HNRNPA1;HNRNPA1L2	P09651;Q32P51	P09651;Q32P51	sp|P09651|ROA1_HUMAN Heterogeneous nuclear ribonucleoprotein A1 OS=Homo sapiens OX=9606 GN=HNRNPA1 PE=1 SV=5;sp|Q32P51|RA1L2_HUMAN Heterogeneous nuclear ribonucleoprotein A1-like 2 OS=Homo sapiens OX=9606 GN=HNRNPA1L2 PE=2 SV=2	14	26	523910000000	23994000000	27333000000	21785000000	21618000000	21166000000	29485000000	24693000000	18963000000	26059000000	23968000000	23110000000	22770000000	20611000000	23471000000	26019000000	22192000000	26626000000	19742000000	26378000000	27332000000	20990000000	25609000000	25364000000	31082000000	26330000000	26137000000	26831000000	29512000000	28680000000	27920000000	30332000000	29401000000	27520000000	27383000000	29589000000	29105000000	28068000000	27217000000	31321000000	29711000000	28382000000	31742000000	27213000000
HSPA8	P11142	P11142	sp|P11142|HSP7C_HUMAN Heat shock cognate 71 kDa protein OS=Homo sapiens OX=9606 GN=HSPA8 PE=1 SV=1	42	56	463570000000	32073000000	21471000000	27014000000	29631000000	24907000000	20050000000	21911000000	18635000000	19533000000	19859000000	14085000000	20453000000	19020000000	19136000000	19942000000	19690000000	20597000000	14356000000	24378000000	20346000000	16790000000	19691000000	31516000000	26951000000	31160000000	30231000000	27949000000	22713000000	21804000000	23616000000	22036000000	23230000000	21040000000	22159000000	24719000000	25741000000	21182000000	22248000000	24139000000	23401000000	25498000000	23153000000	24075000000
HIST1H4A	P62805	P62805	sp|P62805|H4_HUMAN Histone H4 OS=Homo sapiens OX=9606 GN=H4C16 PE=1 SV=2	18	18	361910000000	20502000000	24178000000	11817000000	25372000000	23967000000	17468000000	17911000000	8815700000	14409000000	13326000000	21332000000	25810000000	10960000000	8965500000	20151000000	15400000000	12913000000	7926700000	17315000000	14978000000	15303000000	13095000000	19011000000	30536000000	14098000000	25024000000	25780000000	19293000000	17043000000	12391000000	13616000000	16580000000	27652000000	31196000000	16359000000	13059000000	23561000000	18029000000	16469000000	15873000000	18136000000	16660000000	22043000000
VIM	P08670;P41219;P12036	P08670	sp|P08670|VIME_HUMAN Vimentin OS=Homo sapiens OX=9606 GN=VIM PE=1 SV=4	56	64	352390000000	4967200000	4911200000	4456800000	4545800000	3886700000	17494000000	22668000000	26619000000	26610000000	24438000000	10722000000	19501000000	18545000000	15651000000	15804000000	18673000000	25509000000	11722000000	20140000000	19825000000	17112000000	18587000000	5288500000	6172900000	5519300000	4803500000	4917800000	19768000000	20834000000	36036000000	28237000000	28525000000	16049000000	21944000000	26179000000	23250000000	17227000000	21500000000	31260000000	20329000000	20371000000	21089000000	24518000000
HNRNPK	P61978	P61978	sp|P61978|HNRPK_HUMAN Heterogeneous nuclear ribonucleoprotein K OS=Homo sapiens OX=9606 GN=HNRNPK PE=1 SV=1	33	33	286510000000	11841000000	9638600000	10455000000	11546000000	9752600000	15368000000	17950000000	12847000000	16531000000	14460000000	9833800000	15263000000	11067000000	10591000000	15115000000	15338000000	13411000000	7326600000	17997000000	17160000000	10899000000	12122000000	11439000000	11149000000	12864000000	11561000000	11486000000	16336000000	15728000000	16295000000	17425000000	16663000000	16945000000	16577000000	16660000000	16409000000	15590000000	16083000000	16877000000	16445000000	17051000000	17353000000	16166000000
LDHB	P07195	P07195	sp|P07195|LDHB_HUMAN L-lactate dehydrogenase B chain OS=Homo sapiens OX=9606 GN=LDHB PE=1 SV=2	22	24	285970000000	18957000000	11475000000	14904000000	18486000000	17272000000	12082000000	17526000000	11660000000	14428000000	13706000000	7588900000	14319000000	9159900000	9783300000	12902000000	15134000000	12034000000	6375700000	13857000000	14683000000	9131300000	10509000000	19276000000	13623000000	17652000000	19329000000	19912000000	14491000000	16569000000	14678000000	16485000000	16277000000	12525000000	15732000000	13388000000	13948000000	14675000000	16220000000	14677000000	12963000000	14338000000	15855000000	13590000000
HNRNPA2B1	P22626	P22626	sp|P22626|ROA2_HUMAN Heterogeneous nuclear ribonucleoproteins A2/B1 OS=Homo sapiens OX=9606 GN=HNRNPA2B1 PE=1 SV=2	30	31	283570000000	11932000000	12623000000	10119000000	11141000000	9662100000	14627000000	17276000000	13247000000	15554000000	13446000000	9526000000	14228000000	11441000000	12282000000	13754000000	14138000000	13202000000	10692000000	15280000000	15421000000	11518000000	12458000000	12539000000	14565000000	12625000000	11886000000	11678000000	14974000000	14703000000	15691000000	16255000000	14848000000	14741000000	14510000000	15365000000	15416000000	14477000000	15550000000	15104000000	15996000000	15165000000	15493000000	14974000000
NPM1	P06748	P06748	sp|P06748|NPM_HUMAN Nucleophosmin OS=Homo sapiens OX=9606 GN=NPM1 PE=1 SV=2	24	24	278100000000	22350000000	21084000000	18541000000	20515000000	19709000000	11778000000	11244000000	8903100000	10285000000	9338100000	9345000000	10263000000	9370200000	10079000000	11210000000	9570400000	10182000000	7146400000	13634000000	12302000000	9844900000	11403000000	21558000000	23602000000	21232000000	20892000000	22812000000	13470000000	10378000000	10878000000	10861000000	11321000000	15237000000	11958000000	13590000000	13902000000	11009000000	11378000000	12003000000	15479000000	13294000000	13168000000	13698000000
ENO1	P06733	P06733	sp|P06733|ENOA_HUMAN Alpha-enolase OS=Homo sapiens OX=9606 GN=ENO1 PE=1 SV=2	36	39	257120000000	21849000000	13481000000	13869000000	19625000000	17266000000	7669800000	16235000000	11265000000	16595000000	13219000000	4728000000	13901000000	8028500000	5927800000	7477300000	14700000000	10216000000	4481300000	9425100000	13907000000	6439600000	6820600000	19866000000	14703000000	17650000000	20482000000	18872000000	8981400000	16259000000	15222000000	16169000000	16817000000	9168300000	13895000000	10498000000	9502900000	8671800000	14474000000	13040000000	9366600000	9675200000	13244000000	9934100000
YWHAE	P62258	P62258	sp|P62258|1433E_HUMAN 14-3-3 protein epsilon OS=Homo sapiens OX=9606 GN=YWHAE PE=1 SV=1	25	27	254800000000	9521100000	6591400000	7317900000	9326500000	8493500000	12319000000	17998000000	12261000000	16458000000	14163000000	7772400000	13662000000	9718500000	9062400000	13207000000	15761000000	13224000000	6162000000	15182000000	16323000000	9530300000	10747000000	10169000000	8247500000	9379500000	10120000000	11331000000	14880000000	17020000000	13918000000	18413000000	16017000000	13605000000	14274000000	12401000000	13077000000	14810000000	16908000000	14778000000	11157000000	16243000000	18188000000	13435000000
HNRNPU	Q00839	Q00839	sp|Q00839|HNRPU_HUMAN Heterogeneous nuclear ribonucleoprotein U OS=Homo sapiens OX=9606 GN=HNRNPU PE=1 SV=6	49	49	249170000000	11214000000	13915000000	10472000000	11187000000	10064000000	12758000000	12525000000	11118000000	11615000000	11792000000	8971700000	12923000000	10701000000	9539800000	12197000000	11476000000	12887000000	6823600000	13095000000	11967000000	10674000000	11257000000	12739000000	15881000000	12575000000	12365000000	12651000000	14556000000	13087000000	13692000000	12599000000	13747000000	13746000000	15148000000	14933000000	13465000000	13858000000	13289000000	14670000000	12802000000	13911000000	13664000000	15390000000
PKM	P14618	P14618	sp|P14618|KPYM_HUMAN Pyruvate kinase PKM OS=Homo sapiens OX=9606 GN=PKM PE=1 SV=4	48	50	241000000000	9194900000	5568700000	6303800000	9783300000	7331900000	10980000000	17158000000	13227000000	14769000000	13939000000	8382700000	14318000000	9566400000	8907100000	11687000000	13853000000	12425000000	7538400000	12998000000	13735000000	9182600000	10150000000	9486300000	6997400000	8291600000	10915000000	9206000000	11939000000	16476000000	16085000000	15348000000	15726000000	10703000000	15202000000	11728000000	11035000000	11655000000	15028000000	14122000000	11002000000	13314000000	15167000000	10744000000
HSPD1	P10809	P10809	sp|P10809|CH60_HUMAN 60 kDa heat shock protein, mitochondrial OS=Homo sapiens OX=9606 GN=HSPD1 PE=1 SV=2	59	59	236760000000	18929000000	22783000000	16161000000	17261000000	14908000000	9606300000	8878300000	7583200000	7280000000	7547300000	7508700000	8720300000	8788600000	8931200000	9462400000	7999100000	8561900000	8000500000	11479000000	9086200000	8149800000	9136600000	18707000000	25699000000	18107000000	18307000000	16750000000	10508000000	9050300000	10108000000	8591400000	9115800000	11208000000	10051000000	11350000000	11908000000	9749700000	9868400000	10450000000	13628000000	11582000000	9993200000	10417000000
HIST1H3A;HIST3H3;H3F3C	P68431;Q16695;Q6NXT2	P68431;Q16695;Q6NXT2	sp|P68431|H31_HUMAN Histone H3.1 OS=Homo sapiens OX=9606 GN=H3C12 PE=1 SV=2;sp|Q16695|H31T_HUMAN Histone H3.1t OS=Homo sapiens OX=9606 GN=H3-4 PE=1 SV=3;sp|Q6NXT2|H3C_HUMAN Histone H3.3C OS=Homo sapiens OX=9606 GN=H3-5 PE=1 SV=3	1	16	234850000000	14031000000	15374000000	6892000000	13960000000	15921000000	12335000000	13366000000	7052700000	7364900000	8455400000	14621000000	17962000000	7276200000	6489500000	13472000000	8033300000	8608800000	6057200000	11129000000	8602600000	10311000000	7535900000	13518000000	17753000000	8251100000	11925000000	12687000000	13632000000	16002000000	11783000000	7349800000	10626000000	22195000000	20059000000	12862000000	10474000000	14506000000	10303000000	11121000000	10788000000	11695000000	9525900000	17172000000
EEF2	P13639	P13639	sp|P13639|EF2_HUMAN Elongation factor 2 OS=Homo sapiens OX=9606 GN=EEF2 PE=1 SV=4	58	60	232310000000	18604000000	11980000000	15844000000	18257000000	16014000000	10091000000	12300000000	7804800000	9566000000	9049600000	6165200000	10166000000	7327900000	6884600000	10760000000	10113000000	8572300000	5395700000	11443000000	10735000000	7083800000	8152300000	17849000000	14334000000	19043000000	18311000000	18415000000	11212000000	11089000000	9859600000	9990200000	10414000000	10489000000	10684000000	10435000000	10161000000	11010000000	10602000000	10340000000	9674200000	11144000000	11399000000	10193000000
HNRNPM	P52272	P52272	sp|P52272|HNRPM_HUMAN Heterogeneous nuclear ribonucleoprotein M OS=Homo sapiens OX=9606 GN=HNRNPM PE=1 SV=3	53	53	207390000000	8891300000	9405200000	7988800000	7828800000	6961200000	11413000000	10932000000	9360100000	9085300000	8933800000	8822100000	10793000000	9341900000	9207400000	10390000000	9800300000	10228000000	6772300000	12567000000	9828600000	9209800000	9634100000	9348100000	11506000000	9293700000	8662400000	8579100000	12197000000	10734000000	11969000000	10304000000	11049000000	12736000000	12075000000	12240000000	12140000000	11429000000	11725000000	11738000000	11894000000	13118000000	11522000000	12204000000
CRABP1	P29762	P29762	sp|P29762|RABP1_HUMAN Cellular retinoic acid-binding protein 1 OS=Homo sapiens OX=9606 GN=CRABP1 PE=1 SV=2	15	16	196600000000	2008100000	1051200000	1120900000	2203200000	1634900000	7660300000	14689000000	20638000000	25146000000	19039000000	4480200000	7801400000	10207000000	8882200000	5792000000	8874400000	17930000000	4017000000	7764600000	7013800000	8802700000	9845000000	2103000000	1312200000	1315200000	2454400000	1902700000	8996100000	13864000000	26785000000	27428000000	21360000000	7562900000	8045400000	14308000000	13298000000	6381700000	9396800000	22077000000	6888900000	8037000000	7481000000	13081000000
HNRNPC;HNRNPCL1;HNRNPCL2;HNRNPCL4;HNRNPCL3	P07910;O60812;B2RXH8;P0DMR1;B7ZW38	P07910;O60812;B2RXH8;P0DMR1;B7ZW38	sp|P07910|HNRPC_HUMAN Heterogeneous nuclear ribonucleoproteins C1/C2 OS=Homo sapiens OX=9606 GN=HNRNPC PE=1 SV=4;sp|O60812|HNRC1_HUMAN Heterogeneous nuclear ribonucleoprotein C-like 1 OS=Homo sapiens OX=9606 GN=HNRNPCL1 PE=1 SV=1;sp|B2RXH8|HNRC2_HUMAN Hete	20	20	187070000000	9227800000	9912600000	7229000000	7409500000	5948100000	10496000000	10637000000	8869300000	8275800000	8171300000	5847900000	10663000000	8949500000	7751600000	9421700000	9307000000	8204400000	6091200000	10464000000	9057100000	7386900000	7754400000	9030100000	12133000000	9111800000	8202500000	7552000000	10531000000	9988000000	11276000000	9357600000	10478000000	9901800000	10777000000	11968000000	10894000000	10325000000	10489000000	10068000000	10480000000	10667000000	10423000000	10974000000
PPIA	P62937	P62937	sp|P62937|PPIA_HUMAN Peptidyl-prolyl cis-trans isomerase A OS=Homo sapiens OX=9606 GN=PPIA PE=1 SV=2	14	16	186380000000	9700100000	5850500000	7277300000	10706000000	8647000000	8039200000	10778000000	10215000000	9100100000	9646600000	5440700000	8661100000	8210000000	7134900000	8983400000	9760800000	9064200000	5735000000	10404000000	7539900000	7029900000	8452900000	9566400000	6967000000	8724000000	10454000000	9615100000	8536700000	9477900000	12473000000	9701900000	11130000000	6916200000	8312200000	11236000000	9403600000	8894700000	10433000000	10605000000	8176200000	10040000000	7657700000	9148000000
FLNA	P21333	P21333	sp|P21333|FLNA_HUMAN Filamin-A OS=Homo sapiens OX=9606 GN=FLNA PE=1 SV=4	116	122	186360000000	19980000000	13347000000	15064000000	17289000000	15589000000	6915800000	8983000000	4761900000	7988200000	5945000000	4379300000	6645500000	4385100000	4703000000	7410000000	7000400000	5814000000	3706300000	8175900000	7663800000	4913600000	5695300000	17632000000	14621000000	16653000000	16531000000	16692000000	8032600000	8295100000	7042000000	8084400000	7564400000	7765300000	7743900000	7488600000	7715200000	7955400000	8123800000	7700000000	7762700000	8184900000	8323800000	7722200000
SFPQ	P23246	P23246	sp|P23246|SFPQ_HUMAN Splicing factor, proline- and glutamine-rich OS=Homo sapiens OX=9606 GN=SFPQ PE=1 SV=2	44	46	174210000000	6506700000	6251100000	5583800000	6075700000	5201400000	9364600000	11293000000	10145000000	9011300000	9474900000	5096100000	9290700000	6826000000	7282100000	8346700000	9124100000	8773400000	6291300000	11141000000	7765200000	7596300000	7773300000	6979200000	7352200000	7080800000	6383100000	6104100000	10389000000	10426000000	10140000000	9966400000	10251000000	10001000000	9786400000	10278000000	10469000000	9757000000	9704800000	10528000000	10308000000	10799000000	10566000000	10822000000
HSPA5	P11021	P11021	sp|P11021|BIP_HUMAN Endoplasmic reticulum chaperone BiP OS=Homo sapiens OX=9606 GN=HSPA5 PE=1 SV=2	49	49	167460000000	11003000000	11537000000	9323700000	8795300000	7769400000	8298300000	8181300000	6202300000	7087200000	7180700000	5110600000	6941500000	7159800000	7354600000	6943000000	7182700000	7637100000	3970600000	9380300000	6784900000	6734000000	6883200000	10818000000	13688000000	10360000000	10319000000	9415000000	8819600000	8002700000	8336200000	7761900000	8533200000	7644200000	8103600000	9393200000	9388900000	7880200000	8229200000	8514800000	8870800000	9256800000	8031300000	8368000000
TMSB4X	P62328;O14604	P62328	sp|P62328|TYB4_HUMAN Thymosin beta-4 OS=Homo sapiens OX=9606 GN=TMSB4X PE=1 SV=2	8	9	165740000000	5136200000	2273700000	4338800000	5049900000	4974300000	7591300000	14135000000	7956800000	12156000000	9919200000	5378900000	8582200000	6476700000	6633300000	7674700000	11298000000	8228000000	4233400000	9255900000	11054000000	6527900000	6866100000	5290100000	3903200000	4718400000	5002800000	5971000000	9193900000	13102000000	8310100000	13151000000	11376000000	9066400000	8732500000	8580000000	10214000000	8539200000	11821000000	10690000000	6854500000	9531700000	12150000000	10101000000
YWHAZ	P63104	P63104	sp|P63104|1433Z_HUMAN 14-3-3 protein zeta/delta OS=Homo sapiens OX=9606 GN=YWHAZ PE=1 SV=1	22	24	160890000000	6216500000	4028000000	5221900000	4452000000	5491800000	6004300000	11079000000	9915200000	11920000000	8339500000	5853800000	8831500000	7080800000	6896300000	6089500000	8730900000	8813500000	6371300000	6999600000	8670800000	6828200000	7052600000	7069500000	5246300000	7550700000	6162900000	8021500000	7452500000	10614000000	11481000000	13245000000	11660000000	7381700000	8488600000	10364000000	8995300000	7516500000	9075200000	10192000000	9943200000	7640100000	9446000000	10008000000
LMNB1	P20700	P20700	sp|P20700|LMNB1_HUMAN Lamin-B1 OS=Homo sapiens OX=9606 GN=LMNB1 PE=1 SV=2	54	61	160860000000	4356100000	5440100000	3476900000	4099800000	3128200000	8569600000	10652000000	8673500000	9843400000	9076800000	5754600000	9359200000	6991000000	6669600000	8850500000	9265000000	8187600000	4825700000	9915900000	9440800000	6831500000	7449500000	4796500000	6894000000	4658700000	4496800000	4094200000	9489500000	9908500000	10867000000	10864000000	10433000000	9207600000	9853500000	9999200000	9755400000	9199800000	10473000000	9891100000	9034500000	9749400000	10503000000	10387000000
FASN	P49327	P49327	sp|P49327|FAS_HUMAN Fatty acid synthase OS=Homo sapiens OX=9606 GN=FASN PE=1 SV=3	105	105	156340000000	13515000000	8659300000	10667000000	13262000000	11388000000	6826700000	7646900000	4471500000	5148900000	5938700000	4420900000	6367300000	5094300000	4523100000	7523200000	6351200000	5849200000	3718800000	8122700000	6774200000	4395700000	5679500000	13392000000	10146000000	13018000000	13106000000	13171000000	7567900000	6896200000	6565800000	5935600000	6627900000	7087300000	7243400000	7553000000	7314300000	7612200000	6585900000	6926100000	7181900000	7751900000	6972800000	7123100000
	CON__P00761	CON__P00761		3	3	153750000000	6834000000	6975200000	5285000000	7257000000	4966700000	6931200000	7002600000	6657300000	6078900000	7289400000	6916800000	4231700000	6338200000	8021100000	8501200000	6083800000	7776900000	6774400000	9996100000	6258500000	9344700000	8228500000	7772300000	8824900000	6557000000	6985700000	7372600000	8726900000	6881800000	9246400000	7346200000	9182600000	9485000000	6060400000	9938300000	10970000000	10448000000	7385700000	10094000000	10060000000	10049000000	7362700000	12144000000
HNRNPD	Q14103	Q14103	sp|Q14103|HNRPD_HUMAN Heterogeneous nuclear ribonucleoprotein D0 OS=Homo sapiens OX=9606 GN=HNRNPD PE=1 SV=1	25	27	151280000000	5404900000	5144000000	4395200000	4374800000	4260900000	7166900000	7479200000	7236900000	6690200000	8410500000	7253300000	8091800000	7650200000	8513700000	6165500000	8023900000	8094700000	6336700000	7987500000	7297000000	7346600000	7952200000	5155200000	5406000000	4946000000	4483300000	4606800000	7360700000	8343000000	7861100000	8167100000	8054200000	6914100000	7542700000	7849700000	7828000000	7549800000	8259300000	8338700000	5810900000	8299600000	8238900000	7671200000
TUBB2B	Q9BVA1	Q9BVA1	sp|Q9BVA1|TBB2B_HUMAN Tubulin beta-2B chain OS=Homo sapiens OX=9606 GN=TUBB2B PE=1 SV=1	2	11	148820000000	4995900000	2934600000	3837400000	4933600000	3723600000	7203600000	9584200000	9559500000	8856100000	8705000000	4913500000	8615300000	6892600000	5973900000	7768100000	8005900000	8838800000	4293500000	8396800000	7638700000	6262500000	6886800000	4960000000	3560900000	4567100000	5051200000	4749500000	7352200000	8100900000	12520000000	9288200000	9759200000	6964200000	9702800000	9242600000	8235600000	7277700000	8684400000	10177000000	7470600000	8334600000	8345800000	7797000000
TPI1	P60174	P60174	sp|P60174|TPIS_HUMAN Triosephosphate isomerase OS=Homo sapiens OX=9606 GN=TPI1 PE=1 SV=4	22	22	148010000000	7164400000	4073200000	4994200000	6734400000	5566500000	5596600000	11668000000	8848400000	9644800000	10127000000	3079700000	9762400000	5539500000	4571400000	5264700000	9661000000	7221600000	3880700000	6409100000	8215900000	4949200000	5038500000	7246500000	4957400000	6252800000	7273200000	7520200000	6324400000	11034000000	11306000000	10587000000	11480000000	5372200000	10106000000	7670800000	6761600000	6148100000	10837000000	8647500000	6697800000	6705800000	9017400000	7065200000
PDIA3	P30101	P30101	sp|P30101|PDIA3_HUMAN Protein disulfide-isomerase A3 OS=Homo sapiens OX=9606 GN=PDIA3 PE=1 SV=4	41	41	146380000000	8858100000	10310000000	7300400000	8109400000	6997900000	6632300000	7487500000	6521500000	6823000000	6406500000	4359400000	6684900000	5566200000	5553300000	6495800000	6456700000	6232000000	4288200000	7758600000	6536300000	5160500000	5843300000	8909800000	11753000000	8685700000	8174200000	8296000000	7663900000	7096900000	8384900000	7265900000	7367300000	7334900000	7420600000	7793600000	7886500000	7181200000	7184400000	7799000000	8136400000	7805300000	7211100000	7961100000
MYH10	P35580	P35580	sp|P35580|MYH10_HUMAN Myosin-10 OS=Homo sapiens OX=9606 GN=MYH10 PE=1 SV=3	115	142	143930000000	6387100000	4782800000	5383800000	6006000000	5398400000	7737600000	8626100000	5830800000	7758600000	7107700000	4622600000	7490600000	6160200000	5608200000	7622600000	7279200000	6349600000	3726500000	9509700000	8219500000	5673200000	6646700000	6473500000	6199400000	6608800000	6315400000	6712900000	8471200000	8162600000	7212300000	8211500000	8207400000	7761100000	7977500000	8295000000	8273200000	8540700000	7942500000	8139500000	7820000000	9121500000	8895700000	8135000000
HSP90B1	P14625;Q58FF3	P14625	sp|P14625|ENPL_HUMAN Endoplasmin OS=Homo sapiens OX=9606 GN=HSP90B1 PE=1 SV=1	48	48	142750000000	7903500000	8075000000	6005100000	7166400000	5189800000	6670100000	7858600000	6020900000	6474700000	6838600000	4492800000	7291300000	5748500000	5987200000	6265400000	7006200000	6517100000	4323100000	7909500000	6928000000	5654200000	6420400000	8095200000	10660000000	7665600000	7807100000	7493600000	7729300000	7216500000	7891600000	7509500000	7597900000	7163500000	7299200000	8285700000	8240900000	7119300000	7434000000	7929600000	7873600000	8308600000	7462900000	7645800000
CFL1	P23528	P23528	sp|P23528|COF1_HUMAN Cofilin-1 OS=Homo sapiens OX=9606 GN=CFL1 PE=1 SV=3	15	20	141660000000	5779000000	3320600000	4048300000	5658600000	4188000000	6725700000	9724000000	7903900000	8175500000	8502700000	4245900000	7879600000	5950600000	5999600000	6567600000	7759500000	7742200000	3962000000	8297300000	7583100000	5439200000	6203900000	6299100000	4538000000	5816600000	6220200000	5780400000	7870100000	8939800000	7754600000	9441700000	9154400000	6008200000	8261000000	7600900000	7813900000	7958000000	8819600000	8328000000	6003800000	9561100000	8813200000	7105600000
HSP90AA1	P07900;Q14568;Q58FG0	P07900	sp|P07900|HS90A_HUMAN Heat shock protein HSP 90-alpha OS=Homo sapiens OX=9606 GN=HSP90AA1 PE=1 SV=5	42	43	141470000000	7636100000	5001100000	6053800000	6716200000	5433000000	6437200000	8321200000	6148300000	7722700000	7454200000	4457700000	6970300000	5032300000	5546200000	6501300000	7564200000	7087000000	4141300000	7723300000	7987400000	5563200000	5969300000	8250000000	5791400000	6922000000	7695500000	7951800000	6970800000	7768200000	8016300000	8189200000	8300900000	5991500000	8035300000	7127900000	6867200000	6612100000	8365700000	8373100000	7379000000	7591100000	8558900000	7586100000
ALDOA	P04075	P04075	sp|P04075|ALDOA_HUMAN Fructose-bisphosphate aldolase A OS=Homo sapiens OX=9606 GN=ALDOA PE=1 SV=2	27	30	141070000000	13763000000	8827100000	10320000000	13806000000	11685000000	3713800000	8747400000	5849600000	6808500000	6855600000	2850500000	6815300000	3421300000	2628600000	3872900000	6094100000	5129100000	2467600000	4530100000	6246600000	3406200000	3227400000	13867000000	9008600000	11904000000	13733000000	13743000000	4373300000	8572700000	7517000000	7856800000	8098500000	4474300000	7383000000	4831900000	4224200000	4073900000	6852700000	6203000000	4839900000	4673700000	6842600000	5215000000
NONO	Q15233	Q15233	sp|Q15233|NONO_HUMAN Non-POU domain-containing octamer-binding protein OS=Homo sapiens OX=9606 GN=NONO PE=1 SV=4	43	43	139490000000	3900300000	5808400000	4334200000	5424300000	4106600000	7117600000	7283700000	6490300000	8012000000	7219100000	6184000000	6757600000	6448400000	6015300000	7318900000	5660300000	7788400000	4859700000	8684100000	7184800000	6024800000	6862800000	5246500000	6401500000	5437100000	5300600000	5224000000	7972500000	7260400000	8893800000	7768000000	8437800000	7960200000	8328000000	8922500000	8388000000	7754900000	7835800000	8486100000	8356600000	8301000000	8168000000	8648800000
TUBB	P07437;A6NNZ2	P07437	sp|P07437|TBB5_HUMAN Tubulin beta chain OS=Homo sapiens OX=9606 GN=TUBB PE=1 SV=2	6	6	139050000000	4231600000	3260000000	3290200000	4403200000	3777400000	7158700000	8679700000	7693200000	7940500000	7489600000	5143100000	8582000000	6252000000	6052200000	7520600000	7988800000	7549600000	3775900000	8189700000	7572700000	5891600000	6603900000	3576600000	2675000000	3211700000	4298100000	3702900000	5606700000	9042700000	9877700000	8296000000	8250200000	5854200000	8967800000	7444600000	6123300000	5831200000	8200300000	7368200000	3991800000	6589200000	7807500000	4990800000
IGF2BP1	Q9NZI8;REV__Q15833;Q15517	Q9NZI8	sp|Q9NZI8|IF2B1_HUMAN Insulin-like growth factor 2 mRNA-binding protein 1 OS=Homo sapiens OX=9606 GN=IGF2BP1 PE=1 SV=2	36	38	138440000000	4241100000	2973900000	3529700000	3793300000	3048000000	8569500000	8012900000	6596600000	6961000000	7064800000	5082100000	7432600000	6682000000	6692800000	8348900000	6947100000	7339200000	4641200000	9434600000	7446700000	6335300000	7266500000	4497100000	3772400000	4250800000	4283100000	4169700000	9505500000	7852800000	8681300000	7700700000	8617300000	7991800000	8560000000	9553200000	9532600000	9168400000	7847900000	8759600000	8209400000	9642200000	7970600000	9152900000
HNRNPH1	P31943	P31943	sp|P31943|HNRH1_HUMAN Heterogeneous nuclear ribonucleoprotein H OS=Homo sapiens OX=9606 GN=HNRNPH1 PE=1 SV=4	11	19	137100000000	5152600000	4657500000	3841800000	5203100000	3944600000	7641800000	8632000000	5712400000	6762900000	6844600000	5063900000	7767600000	5595900000	5570900000	7489500000	7625200000	6636400000	3576000000	9817900000	7189300000	6046900000	6327300000	5099600000	5329900000	4654200000	5309500000	4544200000	8411900000	7579700000	7438000000	7161300000	7671200000	8037700000	7997500000	8090200000	8066100000	7651100000	8025500000	7760100000	7066900000	9292700000	7204600000	8421000000
NES	P48681	P48681	sp|P48681|NEST_HUMAN Nestin OS=Homo sapiens OX=9606 GN=NES PE=1 SV=2	88	88	136060000000	1351200000	1437200000	1253900000	1332000000	1172500000	7437600000	9040000000	7459500000	10682000000	9509600000	4774800000	6942700000	6912600000	7168700000	7461000000	7129700000	9471900000	4413800000	8972800000	7799600000	6574100000	7767000000	2037500000	2462700000	2359300000	2057400000	2148900000	8660100000	8385600000	10179000000	11240000000	10341000000	7858600000	7275600000	9846800000	10016000000	7919900000	7628600000	11071000000	8335100000	8985200000	7930400000	9626900000
HNRNPA3	P51991	P51991	sp|P51991|ROA3_HUMAN Heterogeneous nuclear ribonucleoprotein A3 OS=Homo sapiens OX=9606 GN=HNRNPA3 PE=1 SV=2	26	26	133880000000	6073200000	6016200000	4330900000	4981000000	4639900000	6797400000	9081400000	4513600000	8973600000	6994300000	4269400000	6759300000	4332400000	4226800000	7730900000	8625000000	5825200000	2723100000	8625200000	8496900000	4617700000	5245000000	5269200000	6438900000	5321400000	4845100000	4849400000	7361300000	8269200000	6476300000	8408200000	8184600000	6837200000	7540400000	6923500000	6681800000	8353000000	8782800000	8439500000	5427000000	9313000000	9074700000	6978200000
PRDX1	Q06830	Q06830	sp|Q06830|PRDX1_HUMAN Peroxiredoxin-1 OS=Homo sapiens OX=9606 GN=PRDX1 PE=1 SV=1	18	23	133310000000	12504000000	7866900000	8675900000	13513000000	10780000000	5211200000	7440500000	4474600000	5540100000	4673400000	3274300000	5154400000	3581100000	3383100000	5362100000	5324600000	4960400000	2649800000	6261100000	5415600000	3426900000	3841700000	13817000000	10550000000	12394000000	15513000000	12547000000	5151800000	6055400000	5307500000	5928000000	5265500000	4915400000	5361900000	4843200000	4959300000	5433700000	5754000000	5399800000	4330900000	5816300000	5810900000	5019800000
NCL	P19338	P19338	sp|P19338|NUCL_HUMAN Nucleolin OS=Homo sapiens OX=9606 GN=NCL PE=1 SV=3	40	40	125570000000	9744500000	7411100000	8073300000	8900700000	7633500000	4778300000	6447100000	4414900000	5764300000	5543100000	3158100000	5046500000	4264500000	4085700000	5306200000	5800300000	5358300000	2875700000	6130700000	6170400000	4015400000	4650700000	9953000000	9050300000	9565900000	9106200000	8686600000	5171000000	5972800000	5566300000	6272500000	6310400000	4495900000	5814900000	5754600000	5612100000	5540000000	6116500000	6031000000	4761000000	5785900000	6566600000	5704100000
ATP5B	P06576	P06576	sp|P06576|ATPB_HUMAN ATP synthase subunit beta, mitochondrial OS=Homo sapiens OX=9606 GN=ATP5F1B PE=1 SV=3	27	27	123940000000	5498600000	6912200000	4590000000	5091500000	3880800000	6305900000	7261800000	5449200000	5458700000	5435900000	4212600000	6909200000	5058800000	4837500000	6491000000	6550700000	5469800000	3897800000	8310900000	6511000000	4497700000	5308100000	5618800000	7700400000	5270100000	5317200000	4518900000	6657200000	6820800000	7044500000	5672600000	5967100000	6643000000	7295800000	7020000000	6941000000	6346000000	6638600000	6630100000	7106800000	8113100000	6899100000	6570600000
DPYSL2	Q16555	Q16555	sp|Q16555|DPYL2_HUMAN Dihydropyrimidinase-related protein 2 OS=Homo sapiens OX=9606 GN=DPYSL2 PE=1 SV=1	26	32	121630000000	3059500000	1966500000	2345200000	3205400000	3112000000	6257000000	7911300000	7686600000	7348700000	7251600000	4277900000	7033400000	5366000000	5657700000	6109300000	7359500000	6580300000	4297700000	7240200000	7065200000	4862800000	5640300000	3017300000	2386200000	2715200000	3314600000	3070900000	6533400000	7648000000	10235000000	7989700000	8615100000	5521400000	8234100000	7942400000	7099600000	6551800000	8299900000	8341100000	5835500000	7346300000	7858100000	6658900000
TRIM28	Q13263	Q13263	sp|Q13263|TIF1B_HUMAN Transcription intermediary factor 1-beta OS=Homo sapiens OX=9606 GN=TRIM28 PE=1 SV=5	42	42	114300000000	7015700000	4887200000	5843000000	6396100000	5257600000	5726400000	5694000000	4819900000	4967000000	5210200000	3837100000	5631800000	4510200000	4491200000	5520300000	5024200000	4861500000	3496600000	6701300000	5417700000	4627800000	4365200000	7217600000	6323800000	7542900000	6861500000	6943000000	6361800000	5192700000	5672800000	5235400000	5744800000	5993800000	5814100000	6085800000	6268500000	6106700000	5306100000	5815200000	6274800000	6739700000	6019900000	6431000000
	P0DP25;P0DP24;P0DP23;P02585	P0DP25;P0DP24;P0DP23	sp|P0DP25|CALM3_HUMAN Calmodulin-3 OS=Homo sapiens OX=9606 GN=CALM3 PE=1 SV=1;sp|P0DP24|CALM2_HUMAN Calmodulin-2 OS=Homo sapiens OX=9606 GN=CALM2 PE=1 SV=1;sp|P0DP23|CALM1_HUMAN Calmodulin-1 OS=Homo sapiens OX=9606 GN=CALM1 PE=1 SV=1	10	11	113450000000	4368400000	2557800000	3439400000	3837700000	3854400000	5414700000	8416500000	6376000000	8420000000	6666800000	2880700000	6029300000	4477800000	4314600000	5836900000	5706800000	6249200000	2406200000	6070900000	6496100000	4522200000	5107000000	4551100000	3193300000	4081800000	4098500000	4289100000	6485100000	8039000000	8255400000	9490600000	7778400000	4428900000	6564000000	6206600000	6129500000	6199600000	6452000000	7445100000	3950400000	6081100000	7389100000	6554600000
VCP	P55072	P55072	sp|P55072|TERA_HUMAN Transitional endoplasmic reticulum ATPase OS=Homo sapiens OX=9606 GN=VCP PE=1 SV=4	58	58	111360000000	6394500000	4328100000	4298200000	6130800000	4950400000	4749400000	7067200000	5064600000	6292300000	5585700000	3075500000	5787500000	3849000000	3719300000	4731600000	5980900000	5595500000	2997500000	6045600000	6026200000	3933700000	4761300000	6410000000	5202800000	6013700000	6311600000	6319600000	5362900000	6541200000	6638500000	6576500000	6328100000	5074100000	6008800000	6136700000	5525800000	5236000000	6160200000	6456100000	5435900000	5887200000	6354000000	5799200000
ATP5A1	P25705	P25705	sp|P25705|ATPA_HUMAN ATP synthase subunit alpha, mitochondrial OS=Homo sapiens OX=9606 GN=ATP5F1A PE=1 SV=1	37	37	110530000000	4646200000	5890100000	3978500000	4476200000	3590700000	6075500000	6485700000	4903700000	4874500000	5016800000	4109900000	5796200000	4525200000	4493900000	5714900000	5750800000	4728100000	3864000000	6468700000	5607900000	4513700000	5018000000	4825400000	6994200000	4820600000	4860900000	4262200000	6616100000	6079800000	5958600000	5378600000	5850600000	6419000000	6716800000	6871200000	6504800000	6036400000	6391800000	5793400000	6684700000	6382900000	6139600000	6313100000
ACTC1;ACTA2;ACTG2	P68032;P62736;P63267	P68032;P62736;P63267	sp|P68032|ACTC_HUMAN Actin, alpha cardiac muscle 1 OS=Homo sapiens OX=9606 GN=ACTC1 PE=1 SV=1;sp|P62736|ACTA_HUMAN Actin, aortic smooth muscle OS=Homo sapiens OX=9606 GN=ACTA2 PE=1 SV=1;sp|P63267|ACTH_HUMAN Actin, gamma-enteric smooth muscle OS=Homo sapien	2	10	109230000000	6932200000	5403900000	4619200000	6749400000	4306100000	4307500000	8067300000	3895900000	5874000000	5792400000	2293600000	5079400000	3199400000	3134700000	6165200000	6540100000	4198000000	1113200000	7325900000	6761600000	3373300000	4101900000	8067100000	7187000000	6824000000	7650300000	6630000000	4379400000	7041300000	4893200000	6473000000	5845600000	3128100000	5287800000	3686200000	4428400000	5457900000	6588500000	4719200000	2324900000	4922500000	6480100000	4068000000
TKT	P29401	P29401	sp|P29401|TKT_HUMAN Transketolase OS=Homo sapiens OX=9606 GN=TKT PE=1 SV=3	35	35	108580000000	11068000000	8471500000	9378100000	10765000000	8453800000	3460100000	4701000000	3710400000	4111600000	4087500000	2273500000	4809300000	2711100000	2721900000	3460400000	4245100000	3587400000	2436700000	3961100000	4220000000	2888500000	3060700000	10950000000	9547600000	10457000000	10704000000	10122000000	4178000000	4538700000	4890200000	4494700000	4801600000	3782200000	5169000000	4133500000	3998800000	3969500000	4820700000	4486600000	4281900000	4116300000	4720800000	4322500000
NASP	P49321	P49321	sp|P49321|NASP_HUMAN Nuclear autoantigenic sperm protein OS=Homo sapiens OX=9606 GN=NASP PE=1 SV=2	45	45	106710000000	8308700000	5437800000	6940900000	7954200000	7659900000	3771900000	5367700000	3766700000	5136800000	4569100000	2889200000	4237500000	3376900000	3122500000	5061600000	4514900000	4047300000	2430800000	5621100000	5581900000	3305900000	3609200000	8162600000	6656800000	7965800000	8006500000	8243900000	4745100000	5495400000	4937600000	5448300000	5031700000	4933400000	5106300000	5044900000	4637600000	5261100000	4910900000	5004500000	3901700000	5468500000	5972600000	5010800000
DYNC1H1	Q14204	Q14204	sp|Q14204|DYHC1_HUMAN Cytoplasmic dynein 1 heavy chain 1 OS=Homo sapiens OX=9606 GN=DYNC1H1 PE=1 SV=5	206	206	106150000000	3521700000	1668300000	2314400000	3602100000	2681100000	5831300000	7475400000	5054300000	7003300000	6316700000	3778900000	6144600000	4080500000	3967000000	6083500000	6326800000	5576000000	2715100000	6521000000	6718200000	4245000000	4520700000	3706500000	2992800000	3598500000	3760500000	3867600000	6050600000	6619900000	6749600000	6996400000	6964200000	6148200000	6252900000	6320900000	6326900000	6424700000	6258900000	6714100000	5818000000	6129100000	6862800000	6235200000
MAP1B	P46821	P46821	sp|P46821|MAP1B_HUMAN Microtubule-associated protein 1B OS=Homo sapiens OX=9606 GN=MAP1B PE=1 SV=2	108	110	102680000000	1163000000	687240000	1006900000	1467000000	1049100000	5843000000	7907600000	6148900000	7080500000	7121300000	3637700000	5925200000	4711800000	4473200000	5402600000	6437700000	6247600000	3075300000	6555900000	7076100000	4460200000	5198700000	1755000000	1080700000	1434300000	1783200000	1585500000	6394800000	7191700000	7685700000	8210800000	7722800000	6156300000	6583800000	6366400000	6280600000	6181500000	6687500000	7524700000	6344500000	6383900000	7488100000	6462800000
CLTC	Q00610;P53675	Q00610	sp|Q00610|CLH1_HUMAN Clathrin heavy chain 1 OS=Homo sapiens OX=9606 GN=CLTC PE=1 SV=5	80	80	102070000000	5914400000	4359400000	4807800000	5633100000	4780400000	4726300000	5687300000	4270300000	5478000000	4566500000	3291900000	5003600000	3593400000	3489800000	5141600000	5078900000	4832100000	2688500000	5866800000	5311400000	3517300000	4030300000	5943600000	5381700000	5725200000	5936500000	5604700000	5556000000	5393200000	5660200000	5794900000	5411200000	5260100000	5350700000	5360700000	5300000000	5457800000	5341500000	5729900000	5006000000	5732100000	5884500000	5339100000
CKB	P12277;P06732	P12277	sp|P12277|KCRB_HUMAN Creatine kinase B-type OS=Homo sapiens OX=9606 GN=CKB PE=1 SV=1	24	24	100160000000	1707900000	839430000	1160300000	2002900000	1417500000	4209200000	9091600000	7223300000	8007900000	7154300000	2515300000	7225000000	4323400000	4195100000	4028300000	6732300000	6295500000	2467700000	5387900000	5913500000	3764400000	4498500000	2083700000	1311800000	1715500000	2290400000	2088800000	4513900000	7916100000	7913600000	8471600000	7565200000	4184000000	6628600000	5645600000	5579500000	4537600000	7300500000	7188600000	4564500000	4873000000	5980400000	5392600000
EIF4A1	P60842	P60842	sp|P60842|IF4A1_HUMAN Eukaryotic initiation factor 4A-I OS=Homo sapiens OX=9606 GN=EIF4A1 PE=1 SV=1	19	34	97269000000	7372200000	5163100000	5337000000	7611600000	5807100000	4409900000	4848600000	3536400000	3786700000	3750800000	2726900000	4589700000	3369400000	3392000000	5033600000	4138800000	3802000000	2321200000	5144400000	4183800000	3250400000	3692800000	7805300000	6510300000	6992700000	7886700000	7817200000	5248600000	4484500000	4176800000	4090700000	4033400000	4357600000	4648000000	4649400000	4789000000	5506400000	4425300000	4472600000	3937800000	4955700000	4486800000	4575100000
MATR3	P43243	P43243	sp|P43243|MATR3_HUMAN Matrin-3 OS=Homo sapiens OX=9606 GN=MATR3 PE=1 SV=2	47	47	97140000000	4270500000	4451600000	3473000000	4248000000	3245200000	4898300000	5840500000	4039200000	5384400000	4522000000	3373600000	4885300000	3714400000	3655800000	5152400000	5078000000	4776700000	2633600000	6162400000	5351800000	3693900000	4289600000	4589000000	5747400000	4475900000	4417100000	4286600000	5535400000	5608600000	5244000000	5900400000	5444400000	5425500000	5271800000	5452100000	5452800000	5553100000	5572200000	5496700000	4912800000	5920700000	5562200000	5269100000
PRKDC	P78527	P78527	sp|P78527|PRKDC_HUMAN DNA-dependent protein kinase catalytic subunit OS=Homo sapiens OX=9606 GN=PRKDC PE=1 SV=3	173	173	96286000000	3035000000	2648300000	2348000000	3528100000	2889100000	5675800000	7538300000	3811500000	5267900000	4973800000	3346400000	6222300000	3396200000	3309000000	7606000000	5843700000	4488500000	2084000000	6904500000	4497800000	3404600000	3467500000	3522400000	3669000000	3501700000	3892800000	3900200000	6084900000	6463600000	4829900000	5505600000	5533400000	6087700000	6031200000	5092200000	5087400000	7231200000	5787200000	5358100000	4784700000	5933100000	4996200000	5339700000
DHX9	Q08211	Q08211	sp|Q08211|DHX9_HUMAN ATP-dependent RNA helicase A OS=Homo sapiens OX=9606 GN=DHX9 PE=1 SV=4	62	62	95151000000	4522400000	4787600000	4070000000	4334500000	3546100000	4477700000	6036000000	3622300000	4648700000	4298800000	3102900000	5401300000	3277500000	3738500000	5536300000	4911200000	4220000000	2370600000	5708400000	5095400000	3559200000	3885700000	4505500000	5823200000	4498700000	4271600000	4175100000	5379900000	5504600000	4542800000	4903400000	4973200000	5370400000	5281400000	4830300000	5264300000	6099100000	5319900000	5009000000	4937700000	5847000000	5257700000	5036700000
HNRNPL	P14866	P14866	sp|P14866|HNRPL_HUMAN Heterogeneous nuclear ribonucleoprotein L OS=Homo sapiens OX=9606 GN=HNRNPL PE=1 SV=2	25	26	93314000000	5045100000	4470200000	3630800000	4690700000	3425300000	4228600000	5747800000	3842400000	4091800000	4009700000	3498500000	5333200000	3647200000	3411900000	4978100000	4491000000	4326400000	2370400000	5948400000	4633900000	3562500000	3930500000	4565700000	5253300000	4164200000	4446500000	4177400000	4766300000	5023900000	4811500000	4721200000	5222300000	4584500000	5458500000	4588000000	4559600000	4922600000	5269300000	5195500000	3750900000	5596300000	5377900000	4674000000
FSCN1	Q16658	Q16658	sp|Q16658|FSCN1_HUMAN Fascin OS=Homo sapiens OX=9606 GN=FSCN1 PE=1 SV=3	34	34	91800000000	3189100000	2260400000	2690100000	2810300000	2077400000	4295100000	6457100000	4487400000	5747900000	5014500000	3480200000	5733700000	3851200000	4004500000	4330300000	5387800000	4883900000	2532100000	5424700000	5029900000	4068400000	4044000000	3319800000	2997100000	3364100000	3247600000	2965900000	5006000000	6261000000	5679600000	6431400000	6006000000	5372400000	5498900000	5391200000	5166600000	5065400000	6058200000	5870800000	4728600000	5371800000	5483600000	5333700000
DDX5	P17844	P17844	sp|P17844|DDX5_HUMAN Probable ATP-dependent RNA helicase DDX5 OS=Homo sapiens OX=9606 GN=DDX5 PE=1 SV=1	33	46	90566000000	5159700000	4414500000	4926400000	4721500000	3964200000	4672800000	5075500000	3258300000	3969000000	4046400000	3063700000	4211100000	3180100000	3306900000	4968900000	4223500000	3916600000	2307800000	5650500000	4112100000	3485000000	3931300000	5233300000	5430900000	6092600000	5014700000	4840800000	5552000000	4486500000	4356800000	4183000000	4658800000	5165700000	4412100000	4797000000	4847000000	5154100000	4299900000	4570200000	4811400000	5188900000	4219200000	5251900000
PHGDH	O43175	O43175	sp|O43175|SERA_HUMAN D-3-phosphoglycerate dehydrogenase OS=Homo sapiens OX=9606 GN=PHGDH PE=1 SV=4	29	29	90320000000	6500200000	3723500000	3946400000	7496700000	5637700000	4529100000	4053100000	3484000000	3348700000	3172600000	3116000000	4114300000	3385400000	3161600000	4588300000	3773000000	3739500000	2501100000	5491700000	3737100000	3265000000	3554600000	6634800000	4583400000	4681900000	7555700000	6449000000	5236100000	3766500000	4837700000	3731100000	4186400000	4982400000	4513600000	4865400000	4777700000	4956600000	4203700000	4698800000	4854000000	5083400000	4183900000	4754300000
PFN1	P07737;CON__P02584	P07737	sp|P07737|PROF1_HUMAN Profilin-1 OS=Homo sapiens OX=9606 GN=PFN1 PE=1 SV=2	18	18	90149000000	8947800000	5368500000	6915800000	9580000000	8375000000	3284100000	3890500000	2911500000	3472800000	3276900000	2325100000	3064200000	2566800000	2417400000	3419500000	2978100000	2957300000	1931300000	4052100000	3064000000	2601000000	2749600000	8776800000	6614700000	8075500000	9558300000	9098600000	3863500000	3581200000	3606200000	3448600000	3696000000	3835600000	3210100000	3630900000	3559200000	3740300000	3277300000	3721700000	3403300000	3946700000	3288500000	3858200000
UBA1	P22314	P22314	sp|P22314|UBA1_HUMAN Ubiquitin-like modifier-activating enzyme 1 OS=Homo sapiens OX=9606 GN=UBA1 PE=1 SV=3	47	47	87647000000	2861900000	1572100000	1883900000	3062100000	2298200000	4428700000	6009100000	5068400000	5000500000	4815300000	3005200000	5134600000	3854000000	3601700000	4757100000	4780700000	4601400000	2758800000	5471600000	4844400000	3813400000	4023500000	2999200000	2183400000	2577300000	3279400000	2824500000	5026700000	5461700000	6299300000	5331500000	5389900000	4985200000	5238800000	5378400000	5136800000	4990900000	5306500000	5497800000	5086500000	5425800000	5207100000	5279400000
RAN	P62826	P62826	sp|P62826|RAN_HUMAN GTP-binding nuclear protein Ran OS=Homo sapiens OX=9606 GN=RAN PE=1 SV=3	17	17	87332000000	4911700000	3154300000	4005200000	3406500000	4328300000	4594200000	5048500000	3484900000	4081700000	4061900000	3736800000	4249200000	3262300000	3593300000	4378100000	4117500000	3830700000	2908100000	4502000000	4153800000	3786000000	3737100000	4584700000	3481400000	4663500000	3577800000	5236900000	5423200000	4257200000	4506800000	4076800000	4565200000	6029200000	4573900000	5221400000	5161500000	4690600000	4758500000	4949100000	5507100000	4167800000	4244500000	5454600000
CSE1L	P55060	P55060	sp|P55060|XPO2_HUMAN Exportin-2 OS=Homo sapiens OX=9606 GN=CSE1L PE=1 SV=3	44	44	85724000000	13055000000	1819800000	2360700000	10903000000	9828500000	2424000000	2717000000	1580900000	1997700000	1933200000	14300000000	1957200000	2864700000	1515600000	2682000000	1873800000	1932700000	1707700000	2602200000	2275200000	1612800000	1780100000	5707100000	4542800000	5600400000	5771000000	5992600000	5208800000	4686700000	4055500000	4479900000	4490200000	4815200000	4443600000	4708500000	4338000000	5048300000	4380100000	4412500000	4486700000	4924700000	4732500000	4851000000
TPM4	P67936	P67936	sp|P67936|TPM4_HUMAN Tropomyosin alpha-4 chain OS=Homo sapiens OX=9606 GN=TPM4 PE=1 SV=3	20	35	85493000000	5905300000	4557900000	4626800000	5761500000	3838300000	3262300000	4183100000	3869300000	3748600000	3992000000	2299900000	4934100000	3178500000	2646600000	3071900000	4730900000	3727900000	2008600000	4299700000	4779200000	2844500000	3225900000	5891200000	5282300000	5777700000	5371000000	4982100000	4032600000	4555200000	4855700000	4740900000	4525200000	3862300000	4444500000	4147500000	4117100000	3873600000	5022500000	4655900000	4207200000	4179400000	5159400000	4359200000
PCBP1	Q15365	Q15365	sp|Q15365|PCBP1_HUMAN Poly(rC)-binding protein 1 OS=Homo sapiens OX=9606 GN=PCBP1 PE=1 SV=2	13	18	85453000000	5317900000	3388100000	4474500000	5116200000	4270800000	3934800000	4662000000	3675300000	3804400000	3988400000	2682400000	4227200000	3157100000	3100700000	3952400000	4069400000	3721100000	2536900000	4793000000	4156600000	3059400000	3364400000	5552900000	4565900000	5772300000	5356000000	5162600000	4381200000	4298500000	4928800000	4101500000	4571000000	4590300000	4593200000	4638800000	4542800000	4069100000	4376800000	4452100000	4657800000	4416700000	4441200000	4548600000
ILF3	Q12906	Q12906	sp|Q12906|ILF3_HUMAN Interleukin enhancer-binding factor 3 OS=Homo sapiens OX=9606 GN=ILF3 PE=1 SV=3	33	37	83004000000	4461300000	4724800000	3649900000	4101300000	3474900000	3929000000	5553100000	3428700000	4664300000	4329300000	2298700000	4601300000	2505700000	2554500000	4358300000	4925800000	3323100000	1733300000	4771300000	4307700000	2583800000	2723700000	4420300000	5446000000	4524600000	4085400000	4455100000	4314700000	5250000000	4231700000	4959300000	4752100000	3981000000	4866500000	3640300000	3839300000	4638600000	4955400000	4231000000	3750900000	4512400000	4561300000	3987800000
MARCKS	P29966	P29966	sp|P29966|MARCS_HUMAN Myristoylated alanine-rich C-kinase substrate OS=Homo sapiens OX=9606 GN=MARCKS PE=1 SV=4	13	13	82967000000	1104700000	830480000	1123200000	1241900000	1120400000	3721300000	6531400000	3783200000	7102500000	5643600000	2746900000	4660400000	4129900000	3031800000	4653400000	4888400000	4973000000	2939500000	5280200000	5390300000	3849700000	4221300000	1347800000	1425600000	2067000000	1617900000	2210100000	5797100000	6802700000	3380700000	9647700000	5302500000	5690400000	3904900000	4344400000	4615000000	6588900000	4811100000	4977800000	4267200000	5735400000	7014000000	4968600000
GNB2L1	P63244	P63244	sp|P63244|RACK1_HUMAN Receptor of activated protein C kinase 1 OS=Homo sapiens OX=9606 GN=RACK1 PE=1 SV=3	24	24	82849000000	5665600000	4570000000	4695500000	6539200000	5184500000	3578500000	4301100000	3044700000	3451900000	3402100000	2618700000	3584100000	2883100000	2766900000	3912500000	3774800000	3111100000	1960000000	4311100000	3451000000	2763800000	3278500000	5576400000	5217200000	5592000000	6180900000	6053000000	4208300000	4042100000	3931700000	3785300000	3950500000	4288500000	4207000000	3996400000	4029600000	4136500000	4379600000	3892300000	4574600000	4423900000	3644400000	4113100000
XRCC6	P12956	P12956	sp|P12956|XRCC6_HUMAN X-ray repair cross-complementing protein 6 OS=Homo sapiens OX=9606 GN=XRCC6 PE=1 SV=2	43	43	82013000000	3561300000	2759900000	2830800000	3813500000	3159500000	4251000000	5254200000	3772300000	3988400000	3836600000	2676500000	4535100000	3270000000	3307200000	4701100000	4401100000	3632600000	2131000000	5066500000	4433500000	3223500000	3407000000	3709900000	3597300000	3636900000	4048500000	3912400000	4753100000	4887900000	4442500000	4431300000	4416200000	4461800000	4944000000	4382500000	4683600000	5089900000	4755900000	4425500000	4155500000	5015100000	4864700000	4752800000
CALR	P27797	P27797	sp|P27797|CALR_HUMAN Calreticulin OS=Homo sapiens OX=9606 GN=CALR PE=1 SV=1	23	23	81121000000	5656000000	6529400000	4609100000	4957700000	4095000000	3640000000	4204200000	3013300000	3537700000	3126200000	2315400000	3556400000	2655100000	3187000000	3103000000	3494200000	3566800000	2079000000	4104400000	3813200000	2755400000	3121900000	5620200000	7226100000	5115900000	5003300000	4650200000	3970000000	3863400000	4144800000	3733500000	4080800000	3720200000	3681900000	3690100000	4318100000	3333500000	3811900000	4232400000	4508100000	3893900000	3898600000	4172100000
MYH9	P35579;REV__Q9UKV3;P12883;Q9UKX3;P12882;P11055;A7E2Y1	P35579	sp|P35579|MYH9_HUMAN Myosin-9 OS=Homo sapiens OX=9606 GN=MYH9 PE=1 SV=4	108	112	80955000000	7423400000	5088500000	5616100000	7032300000	5267800000	3415300000	3648700000	2234600000	2900800000	2719100000	2067400000	3604100000	2369200000	2444400000	3644400000	3341400000	2580200000	1854300000	4815500000	3810700000	2391000000	2685800000	6897900000	5895900000	6461900000	6753700000	6174500000	4111000000	3619600000	3084700000	3365800000	3184400000	3899600000	3602200000	3567100000	3579600000	4313300000	3604500000	3258400000	3769500000	4515800000	4105900000	3624200000
PRDX2	P32119	P32119	sp|P32119|PRDX2_HUMAN Peroxiredoxin-2 OS=Homo sapiens OX=9606 GN=PRDX2 PE=1 SV=5	17	17	79429000000	1304600000	981800000	967990000	1353800000	1170000000	4484600000	6345800000	4748600000	5657300000	5002500000	2784800000	4886300000	3364600000	2683900000	4869100000	5230300000	4325300000	2493100000	5082600000	5082000000	3293100000	3317400000	1495500000	1604200000	1586600000	1609200000	1786900000	4594500000	5706700000	5823700000	5817700000	5284800000	4996900000	4685000000	4476500000	4886600000	4960000000	5603500000	4851300000	5322600000	4596600000	5141800000	5099400000
HMGB1	P09429;B2RPK0;P23497	P09429	sp|P09429|HMGB1_HUMAN High mobility group protein B1 OS=Homo sapiens OX=9606 GN=HMGB1 PE=1 SV=3	16	19	78198000000	3686200000	2866300000	2334500000	3305200000	2459200000	3229100000	5808200000	3819700000	4252400000	3928900000	2224200000	4978200000	2880000000	2565000000	3910100000	4798900000	3623900000	1495700000	5042600000	4962300000	3045700000	2981900000	3462400000	3352800000	2912200000	3283200000	3047400000	3657600000	4954500000	4823200000	4595700000	4626400000	3648500000	5326600000	4293800000	3795300000	4346900000	4977000000	3962700000	3016100000	4784500000	4854100000	4056300000
PGK1	P00558;P07205	P00558	sp|P00558|PGK1_HUMAN Phosphoglycerate kinase 1 OS=Homo sapiens OX=9606 GN=PGK1 PE=1 SV=3	36	36	78122000000	4485800000	2582500000	3407400000	4670200000	3855400000	2914600000	5570500000	3958200000	4658900000	4390500000	2170800000	4243700000	2713500000	2376300000	3025400000	4671600000	3570600000	1924500000	3785100000	4211000000	2315800000	2619700000	4500800000	3176700000	4021800000	4891900000	4748000000	3269400000	5021500000	4932600000	5041300000	5083900000	3120700000	4466700000	3655600000	3378500000	3493000000	4704900000	4053100000	3543200000	3724300000	4245100000	3320600000
YWHAQ	P27348	P27348	sp|P27348|1433T_HUMAN 14-3-3 protein theta OS=Homo sapiens OX=9606 GN=YWHAQ PE=1 SV=1	22	22	76514000000	2910500000	1719800000	2352000000	2699100000	2659100000	3765300000	4795600000	4068500000	5114500000	4631300000	2481400000	4356500000	3148100000	2934000000	3497300000	4302800000	3989800000	2479400000	3795600000	4043900000	3293500000	3476200000	3256400000	2447500000	3580900000	3186000000	4006900000	4577200000	4804800000	4298400000	6140200000	5006700000	3925200000	4109400000	3915000000	3960300000	4530000000	5008700000	4562600000	4253300000	4211400000	4663800000	4384800000
GSTP1	P09211	P09211	sp|P09211|GSTP1_HUMAN Glutathione S-transferase P OS=Homo sapiens OX=9606 GN=GSTP1 PE=1 SV=2	17	17	76312000000	4328200000	2799800000	3107600000	4475700000	4148400000	2828400000	4998800000	3688300000	4292500000	3866300000	2105100000	4301700000	2516000000	2519000000	4246600000	4393700000	3176900000	1834200000	3217900000	3880600000	2503000000	3083400000	4096700000	3168700000	3468300000	4540900000	4252100000	3950800000	4915600000	4739800000	4492700000	4310200000	3144500000	4507900000	3756400000	3793800000	4347700000	4729000000	3961400000	3123100000	4703800000	3999300000	3412900000
IDH1	O75874	O75874	sp|O75874|IDHC_HUMAN Isocitrate dehydrogenase [NADP] cytoplasmic OS=Homo sapiens OX=9606 GN=IDH1 PE=1 SV=2	25	25	75394000000	4760700000	2863100000	3727100000	4807500000	4053700000	3402300000	3270900000	3311800000	3585900000	3274600000	2516800000	3303900000	2910400000	2895000000	3990600000	3283100000	3476100000	2402800000	4353500000	3530700000	2810900000	2862100000	4853100000	3407700000	4003900000	4879300000	4481000000	3810500000	3327900000	4828200000	3866800000	3900500000	4361600000	3707800000	4165100000	4353800000	3849700000	3989300000	4387600000	4273200000	4414200000	3663200000	4167500000
CCT8	P50990	P50990	sp|P50990|TCPQ_HUMAN T-complex protein 1 subunit theta OS=Homo sapiens OX=9606 GN=CCT8 PE=1 SV=4	42	42	73126000000	4932200000	2960400000	3724900000	4600600000	3837700000	3344600000	3703500000	3074700000	3340300000	3498500000	2442800000	3626500000	2689900000	2687900000	3148000000	3356400000	3086800000	2335700000	3686700000	3549700000	2672300000	2825700000	4906500000	3901800000	4726300000	5010900000	4887400000	3769900000	3735300000	3798700000	3691100000	3771900000	3794100000	3781500000	3730200000	3921200000	3631600000	3958600000	3641000000	3835300000	3906600000	3842700000	3906800000
YWHAB	P31946	P31946	sp|P31946|1433B_HUMAN 14-3-3 protein beta/alpha OS=Homo sapiens OX=9606 GN=YWHAB PE=1 SV=3	16	18	71981000000	3822100000	2555700000	2855900000	3698400000	3313300000	3147600000	4378000000	3921800000	4139700000	3591400000	2259200000	3374800000	2553100000	2642700000	3291800000	3755600000	3615300000	1964300000	3651900000	3744300000	2787700000	2916700000	3970600000	3519100000	4097700000	3961600000	5233600000	3536600000	4293200000	3925300000	4549600000	4104800000	3636300000	3592600000	3700500000	3766700000	4045600000	3864400000	4264700000	3685900000	3605700000	4100500000	4077500000
RPS8	P62241	P62241	sp|P62241|RS8_HUMAN 40S ribosomal protein S8 OS=Homo sapiens OX=9606 GN=RPS8 PE=1 SV=2	17	17	71819000000	7186200000	4912900000	5830200000	6273500000	5503900000	2817800000	2966600000	2415000000	2245800000	2593100000	2533200000	3083600000	1906900000	2104400000	2607400000	2266300000	2897800000	1748100000	2958300000	2570100000	2135600000	2261900000	7737600000	6146500000	6848100000	6881900000	6722100000	3013500000	3082800000	2872400000	2668400000	2846900000	3708600000	3382300000	2876900000	2933500000	3122700000	2833600000	3120200000	3148500000	3233000000	2934500000	2876600000
AHCY	P23526	P23526	sp|P23526|SAHH_HUMAN Adenosylhomocysteinase OS=Homo sapiens OX=9606 GN=AHCY PE=1 SV=4	27	27	71400000000	5437900000	3206400000	4130600000	4915600000	4173800000	3588500000	3624800000	2613100000	3001200000	2971100000	2036300000	3339400000	2357700000	2413500000	3611200000	3306800000	2656700000	1546800000	4345200000	3280900000	2186900000	2655500000	5104600000	3731600000	4617100000	5054100000	4705700000	3962700000	3573900000	3152900000	3357500000	3584200000	3714000000	3668000000	3549900000	3558500000	3704100000	3595400000	3426600000	3579000000	4018000000	3649100000	3489900000
KPNB1	Q14974	Q14974	sp|Q14974|IMB1_HUMAN Importin subunit beta-1 OS=Homo sapiens OX=9606 GN=KPNB1 PE=1 SV=2	39	39	71166000000	4112800000	2827700000	3116600000	4140800000	3307200000	3471800000	4231900000	2996100000	3772100000	3487300000	1975400000	3519900000	2452200000	2158100000	3835200000	3595000000	3080500000	1794500000	4058200000	3824900000	2447200000	2959900000	4140200000	3380700000	3793100000	4136500000	3911400000	3837900000	3966700000	3945200000	3968000000	3956100000	3444700000	3826300000	3679700000	3463700000	4036700000	4038500000	3690000000	3761900000	4129500000	4166800000	3739000000
UCHL1	P09936	P09936	sp|P09936|UCHL1_HUMAN Ubiquitin carboxyl-terminal hydrolase isozyme L1 OS=Homo sapiens OX=9606 GN=UCHL1 PE=1 SV=2	17	17	71056000000	5073000000	2946900000	3282800000	4980200000	3819500000	3011400000	4152900000	3325600000	3247700000	3253500000	1886000000	3364900000	2645300000	2304700000	3536600000	3374000000	3104500000	1622800000	4017600000	3320100000	2254000000	2532100000	5069300000	3597500000	3760700000	4886100000	4410200000	3560800000	3901000000	4351300000	3439100000	3732400000	3147500000	3546600000	3895800000	3389400000	3960000000	3888500000	3889200000	2741500000	4266700000	3611900000	3286100000
RBMX	P38159;O75526;Q8N7X1	P38159	sp|P38159|RBMX_HUMAN RNA-binding motif protein, X chromosome OS=Homo sapiens OX=9606 GN=RBMX PE=1 SV=3	10	26	70720000000	4372500000	4678600000	3037600000	3513100000	2427900000	4152800000	4918900000	2775400000	3626900000	3387100000	1572500000	4068000000	1860100000	2972400000	3304600000	2872800000	3428300000	2210300000	2840800000	2985000000	2735400000	2978600000	4180000000	6143600000	4156900000	3507500000	3297000000	4553800000	4362600000	3363800000	3797700000	3883500000	3002900000	4001800000	3494600000	4258400000	3673000000	3607100000	4112300000	4182000000	2938100000	3071000000	3824000000
SET	Q01105;P0DME0	Q01105	sp|Q01105|SET_HUMAN Protein SET OS=Homo sapiens OX=9606 GN=SET PE=1 SV=3	16	16	69896000000	4545600000	2855600000	4103300000	4568800000	4353300000	2731700000	3732000000	2742400000	3383200000	3034600000	1963100000	3403900000	2906000000	2172900000	2709900000	3418200000	3057100000	1420100000	3681500000	3476000000	2962900000	2674000000	4789300000	4438100000	4927200000	4598100000	4940600000	3145000000	3623200000	3279100000	3776700000	3424600000	2828700000	3624600000	3310400000	3037500000	3271700000	3756300000	3552700000	2718600000	3880700000	3832900000	3533900000
KHSRP	Q92945	Q92945	sp|Q92945|FUBP2_HUMAN Far upstream element-binding protein 2 OS=Homo sapiens OX=9606 GN=KHSRP PE=1 SV=4	37	40	69737000000	2443900000	1837100000	2114300000	2335100000	1961400000	3513700000	4354800000	3669400000	3638300000	3888800000	2473900000	3991900000	3136200000	2772900000	3458800000	4053700000	3496400000	2072900000	4427300000	4186800000	2907200000	3001800000	2538500000	2449700000	2883600000	2485100000	2548500000	4120700000	3998400000	4268200000	4131000000	4254900000	4216700000	4046400000	4397100000	4180100000	3864800000	4209700000	4168700000	4539000000	4275200000	4394000000	4436500000
HSPE1	P61604	P61604	sp|P61604|CH10_HUMAN 10 kDa heat shock protein, mitochondrial OS=Homo sapiens OX=9606 GN=HSPE1 PE=1 SV=2	11	11	69386000000	5616600000	7171900000	4302600000	5632400000	4502700000	2912200000	2931400000	2474200000	2646000000	2350700000	2143900000	2547600000	2294600000	2119400000	2795600000	2607400000	2458800000	2124400000	2823900000	2600200000	2127100000	2202700000	5482000000	8474200000	4889800000	5621000000	5263600000	2956900000	2825300000	3236300000	2852200000	2967000000	3120600000	2691400000	3189500000	3218900000	2997900000	2899000000	2811100000	3590400000	2803800000	2798100000	3061900000
HSPA4	P34932	P34932	sp|P34932|HSP74_HUMAN Heat shock 70 kDa protein 4 OS=Homo sapiens OX=9606 GN=HSPA4 PE=1 SV=4	57	61	68803000000	6601100000	4160400000	4935300000	6413100000	5250700000	2369300000	3500800000	2680000000	3353200000	2732500000	1379200000	2644000000	2009600000	1616500000	2525800000	2880100000	2600300000	1241400000	3059100000	3077800000	1702000000	2071200000	6271000000	4709400000	5774800000	6069300000	6223600000	2943800000	3356000000	3055900000	3654100000	3102500000	2796700000	2863200000	2940600000	2753900000	3020100000	3080700000	3110000000	2644700000	3150400000	3406400000	2864000000
PGD	P52209	P52209	sp|P52209|6PGD_HUMAN 6-phosphogluconate dehydrogenase, decarboxylating OS=Homo sapiens OX=9606 GN=PGD PE=1 SV=3	27	27	68232000000	2921500000	1507700000	2249800000	2735700000	2582000000	3511900000	4489900000	3188900000	3727900000	3563600000	2333900000	3794200000	2465900000	2570300000	3927800000	3601400000	3398400000	1919200000	4496100000	3863300000	2627400000	2755400000	3013500000	2098100000	2820800000	2808000000	2997400000	4094800000	4199900000	4122600000	4080700000	4200100000	3593800000	3995100000	3584400000	3692400000	4223900000	3995600000	4251600000	3561300000	4378700000	4236000000	3684500000
PRDX6	P30041	P30041	sp|P30041|PRDX6_HUMAN Peroxiredoxin-6 OS=Homo sapiens OX=9606 GN=PRDX6 PE=1 SV=3	22	22	67632000000	4584000000	2548400000	3220500000	4374700000	3506600000	3169200000	3928000000	2444800000	3437700000	3048900000	2329000000	3305700000	2269900000	2357600000	3396100000	3571700000	2798000000	1547400000	3856700000	3409300000	2096000000	2431400000	4709000000	3116500000	3847100000	4569700000	4166100000	3506100000	3639100000	2939300000	3601900000	3434000000	3682200000	3483300000	3226900000	3376900000	3753600000	3757000000	3396700000	3046900000	3861800000	3695800000	3115100000
XRCC5	P13010	P13010	sp|P13010|XRCC5_HUMAN X-ray repair cross-complementing protein 5 OS=Homo sapiens OX=9606 GN=XRCC5 PE=1 SV=3	40	40	67497000000	3172800000	2701600000	2672500000	3138100000	2649300000	3074300000	4083000000	2955300000	3578600000	3311200000	2172300000	3598900000	2812600000	2364100000	3441600000	3802400000	3209200000	1591100000	3710500000	3889900000	2529000000	3038900000	3081700000	3376700000	3292600000	3244000000	3070900000	3720800000	3769800000	3725100000	3614200000	3593400000	3766900000	3911300000	3783700000	3663900000	3874900000	3970000000	3716600000	3467100000	3756300000	3976700000	3660500000
PARP1	P09874	P09874	sp|P09874|PARP1_HUMAN Poly [ADP-ribose] polymerase 1 OS=Homo sapiens OX=9606 GN=PARP1 PE=1 SV=4	52	52	67068000000	3027700000	2654300000	2235100000	3530100000	3173100000	3353400000	4440400000	4193700000	2393900000	3033400000	2069100000	4371200000	2652600000	2961800000	3935800000	3577800000	2628300000	1464600000	3886000000	2830900000	2194600000	2460400000	3145300000	3254600000	3309300000	3595600000	3871100000	3936400000	3973900000	4556800000	2921100000	3335200000	3959500000	4262900000	3747300000	4242500000	4214400000	3871600000	3369500000	3230600000	3745300000	3068300000	3477400000
STIP1	P31948	P31948	sp|P31948|STIP1_HUMAN Stress-induced-phosphoprotein 1 OS=Homo sapiens OX=9606 GN=STIP1 PE=1 SV=1	42	42	66490000000	4133300000	2563100000	3216000000	4133300000	3141100000	2921900000	3860400000	2784700000	3396400000	3265600000	1766200000	3179200000	2212400000	2166200000	3480800000	3256500000	3153900000	1357500000	4041000000	3443700000	2329000000	2688100000	4087600000	3330600000	3958800000	4291300000	3869300000	3565900000	3630300000	3046500000	3843600000	3766400000	3458400000	3399500000	2958700000	3078800000	3696900000	3751000000	3759900000	2994800000	4002900000	3925800000	3413100000
CCT2	P78371	P78371	sp|P78371|TCPB_HUMAN T-complex protein 1 subunit beta OS=Homo sapiens OX=9606 GN=CCT2 PE=1 SV=4	33	33	65949000000	4164500000	3028100000	2821700000	4671100000	3563500000	2984400000	3370900000	2724900000	2854700000	2879000000	1959600000	3259200000	2463600000	2649600000	2952600000	3266100000	2684800000	1869200000	3710700000	3029600000	2440200000	2601400000	4276700000	3652200000	3761000000	4443000000	4301900000	3228600000	3318000000	3599200000	3134500000	3282900000	2943500000	3751100000	3405800000	3479300000	3183500000	3375800000	3407200000	3393900000	3494500000	3410400000	3106600000
EEF1D	P29692	P29692	sp|P29692|EF1D_HUMAN Elongation factor 1-delta OS=Homo sapiens OX=9606 GN=EEF1D PE=1 SV=5	12	12	64485000000	3372500000	2225400000	2630700000	3355400000	2660100000	3697600000	3435600000	2838900000	2893000000	3100200000	2868300000	3045200000	2458100000	2609800000	2816800000	3014800000	2708300000	1985200000	3529900000	3120400000	3255200000	2863000000	3602500000	2874200000	3453700000	3536900000	3285600000	3644900000	3415800000	3918500000	3459200000	3592200000	3492400000	3439300000	3923600000	3981000000	3253300000	3403800000	3574200000	3812700000	3615500000	3462400000	3851800000
GANAB	Q14697	Q14697	sp|Q14697|GANAB_HUMAN Neutral alpha-glucosidase AB OS=Homo sapiens OX=9606 GN=GANAB PE=1 SV=3	45	45	64382000000	2493000000	3091000000	1818200000	2383200000	1866900000	3254600000	4128300000	2665100000	3993600000	3366200000	1968700000	3503600000	2409600000	2662500000	3499000000	3206800000	2988600000	1788700000	4024100000	3853800000	2564600000	2851500000	2340900000	3379000000	2127900000	2269900000	1998300000	3782700000	3788600000	3765300000	3979900000	3799300000	3149800000	3757000000	3585300000	3599000000	3774000000	3705900000	3855600000	3309100000	4019500000	4060900000	3719200000
RPLP2	P05387	P05387	sp|P05387|RLA2_HUMAN 60S acidic ribosomal protein P2 OS=Homo sapiens OX=9606 GN=RPLP2 PE=1 SV=1	9	10	62858000000	5180500000	3764500000	4252500000	5014500000	4404300000	2601800000	3284100000	1860800000	2756800000	2445800000	1579000000	2363600000	1902300000	1969300000	2702900000	2639900000	2447000000	1326900000	3156600000	3027400000	1996600000	2180900000	5195400000	4508100000	4897500000	5145200000	4791100000	3001300000	3074600000	2412800000	2962400000	2764600000	2720100000	2565300000	2859300000	3043900000	3008300000	2999800000	3129900000	2375300000	3301500000	3339400000	2978400000
RPLP0;RPLP0P6	P05388;Q8NHW5	P05388;Q8NHW5	sp|P05388|RLA0_HUMAN 60S acidic ribosomal protein P0 OS=Homo sapiens OX=9606 GN=RPLP0 PE=1 SV=1;sp|Q8NHW5|RLA0L_HUMAN 60S acidic ribosomal protein P0-like OS=Homo sapiens OX=9606 GN=RPLP0P6 PE=5 SV=1	20	20	61958000000	4965100000	3847200000	4350200000	4477800000	4793900000	2758600000	2916500000	1603700000	2793300000	2325800000	2002200000	2380600000	1611500000	1966000000	2825200000	2370100000	2271300000	1545100000	2932500000	3043000000	1875800000	2303000000	5114900000	4240200000	5318200000	4542000000	5556100000	2964200000	3024600000	2403400000	2885300000	2726500000	3292300000	2685000000	2603000000	2829100000	2976200000	3054200000	2997400000	2969500000	3027400000	3284800000	2786600000
TCP1	P17987	P17987	sp|P17987|TCPA_HUMAN T-complex protein 1 subunit alpha OS=Homo sapiens OX=9606 GN=TCP1 PE=1 SV=1	32	32	61696000000	3777700000	2225900000	2517300000	3781000000	3180000000	2790500000	3729600000	2206700000	5344700000	2597400000	1908200000	2707200000	2106000000	2116200000	3022500000	2990200000	2417000000	1521900000	3080000000	3111000000	2309000000	2256100000	4128900000	3099600000	3780300000	4071800000	3959800000	3041800000	3189600000	3312900000	3360600000	3112700000	3177800000	3050300000	3109600000	3164300000	3184500000	3249500000	3149300000	3055500000	3227400000	3304300000	3371900000
NME1	P15531	P15531	sp|P15531|NDKA_HUMAN Nucleoside diphosphate kinase A OS=Homo sapiens OX=9606 GN=NME1 PE=1 SV=1	6	11	61560000000	4703400000	3518100000	3599900000	4722700000	4539000000	2555800000	3506100000	2128800000	2917700000	2350300000	1716700000	2565600000	2026400000	1997100000	2671200000	2911600000	2229900000	1353300000	3106900000	2478800000	1911100000	2050000000	4497400000	3990900000	4323800000	4718000000	5467900000	2988500000	3355600000	2357600000	2948600000	2606000000	2682600000	2632900000	2771900000	2764300000	3383000000	3217900000	2640800000	2645800000	3076200000	2569200000	2903800000
HSPA9	P38646	P38646	sp|P38646|GRP75_HUMAN Stress-70 protein, mitochondrial OS=Homo sapiens OX=9606 GN=HSPA9 PE=1 SV=2	41	41	61225000000	5339600000	6232200000	4291800000	4971500000	4147500000	2589000000	2358500000	1937700000	1891000000	1988000000	1664700000	2424900000	1952800000	1869200000	2620700000	2193400000	2161600000	1348200000	3058500000	2345500000	1789400000	2049500000	5439600000	7221000000	5268900000	5046100000	4909300000	2967500000	2476700000	2422300000	2286700000	2326700000	2648000000	2743200000	2752400000	2631100000	2893900000	2534500000	2625300000	2185700000	3171300000	2456500000	2692700000
RPS3A	P61247	P61247	sp|P61247|RS3A_HUMAN 40S ribosomal protein S3a OS=Homo sapiens OX=9606 GN=RPS3A PE=1 SV=2	20	20	61225000000	5288900000	3901500000	4996600000	5277000000	4296100000	2435300000	2771200000	1932500000	2099600000	2397100000	1739800000	2630500000	1929900000	1935400000	2692900000	2440400000	2103200000	1529900000	2710400000	2219300000	1876900000	2021000000	5505000000	4911100000	5766300000	5427600000	5135400000	2807400000	2560300000	2447400000	2312200000	2637400000	2734300000	2965700000	2798200000	2685500000	2978800000	2692800000	2645200000	3184000000	2737300000	2422900000	2787000000
RPS3	P23396	P23396	sp|P23396|RS3_HUMAN 40S ribosomal protein S3 OS=Homo sapiens OX=9606 GN=RPS3 PE=1 SV=2	27	27	60685000000	4358300000	2973500000	3918700000	4071700000	3843300000	3038100000	3217400000	1845300000	2516900000	2487500000	1921500000	2657000000	2081300000	2053900000	3434300000	2609400000	2284600000	1354500000	3334000000	2632600000	1778200000	2273400000	4102000000	3576000000	4509600000	4114000000	4791900000	3324400000	2882800000	2348200000	2675000000	2746400000	2984000000	2717900000	2998100000	3102300000	3530700000	2741400000	2625000000	2771100000	3116000000	2750700000	2684200000
RPSA	P08865	P08865	sp|P08865|RSSA_HUMAN 40S ribosomal protein SA OS=Homo sapiens OX=9606 GN=RPSA PE=1 SV=4	15	15	60304000000	4407600000	3354400000	3915900000	4472000000	3977200000	2240000000	3066200000	2302300000	2484700000	1769300000	1726400000	2793300000	2155300000	2107900000	2773300000	2790100000	2328700000	1663900000	2918100000	2747600000	1992800000	2316600000	4494200000	3991000000	4634700000	4314500000	4398800000	3030400000	2811200000	2740600000	2755400000	3082200000	2896400000	2816700000	2762400000	2918200000	2844500000	2938000000	2803800000	3145600000	2879400000	2956100000	2862000000
YBX1	P67809	P67809	sp|P67809|YBOX1_HUMAN Y-box-binding protein 1 OS=Homo sapiens OX=9606 GN=YBX1 PE=1 SV=3	11	17	60105000000	4389500000	3914500000	4309500000	5063500000	3953700000	2353900000	3041600000	1794900000	3101000000	2518900000	1470500000	2184400000	1746400000	1616700000	2775700000	2961400000	2186000000	883350000	2942700000	3053200000	1793900000	2050000000	4423500000	4432800000	4769000000	4540200000	4526600000	2959500000	2977500000	2409900000	3235100000	2784400000	2615500000	2605800000	2662800000	2714000000	2832000000	3132700000	2733100000	2070300000	2981900000	3237100000	2996400000
RPL4	P36578	P36578	sp|P36578|RL4_HUMAN 60S ribosomal protein L4 OS=Homo sapiens OX=9606 GN=RPL4 PE=1 SV=5	31	31	59510000000	6593300000	4583300000	5086000000	6206900000	4564100000	1765100000	2567100000	1542100000	1908700000	1845100000	1924000000	2768500000	1541400000	1250200000	2044200000	1817600000	1985000000	1531900000	3019400000	2195100000	1309300000	1462000000	6272100000	4942400000	5150700000	6115700000	5419700000	2186400000	2511100000	2285800000	2235700000	2523300000	3281800000	3036800000	2356200000	2103500000	2289200000	2208400000	2458900000	2767500000	2971200000	2548500000	2120300000
PEBP1	P30086	P30086	sp|P30086|PEBP1_HUMAN Phosphatidylethanolamine-binding protein 1 OS=Homo sapiens OX=9606 GN=PEBP1 PE=1 SV=3	14	14	59376000000	3313000000	2169800000	2479400000	3323500000	2856100000	2428900000	3879600000	2921300000	3433100000	3193300000	1869100000	2864900000	2056100000	2204600000	2849000000	3290800000	2502200000	1800500000	3037000000	2623000000	2174300000	2106000000	3144100000	2580400000	3016700000	3382200000	3361100000	2630000000	3565500000	3381700000	3702900000	3402700000	2419500000	2818900000	2863300000	2582800000	3038100000	3558500000	2945600000	2840700000	3046800000	2781200000	2685900000
TMSB10	P63313;CON__P21752	P63313	sp|P63313|TYB10_HUMAN Thymosin beta-10 OS=Homo sapiens OX=9606 GN=TMSB10 PE=1 SV=2	6	6	57740000000	1805900000	1066900000	1513800000	1854200000	1316300000	2873400000	3422600000	3787100000	2791000000	3941500000	1792200000	4144500000	2732900000	2425600000	2348900000	3429500000	3135400000	1948300000	3004700000	3184000000	2667700000	2553700000	1772500000	1193500000	1560600000	1387600000	944580000	3705100000	3122100000	4069200000	2533600000	4963600000	3336500000	4383600000	3986700000	3647800000	1954500000	4069000000	4371200000	3938100000	2902800000	3467500000	4352100000
DPYSL3	Q14195;Q14117	Q14195	sp|Q14195|DPYL3_HUMAN Dihydropyrimidinase-related protein 3 OS=Homo sapiens OX=9606 GN=DPYSL3 PE=1 SV=1	24	26	57629000000	3449800000	2144000000	2832500000	3206000000	2597800000	2654300000	3599900000	2827300000	2660100000	2481300000	1884600000	3111300000	1906100000	2099700000	2580500000	3023400000	2400800000	1713800000	3007000000	3113800000	2127900000	2207200000	3432300000	2657800000	3395500000	3378600000	3262000000	3106200000	3219700000	3585100000	2865100000	2897900000	2831900000	3107600000	3012800000	2972200000	2935100000	3242800000	3040500000	3221900000	3053600000	3384700000	3095800000
DDX17	Q92841	Q92841	sp|Q92841|DDX17_HUMAN Probable ATP-dependent RNA helicase DDX17 OS=Homo sapiens OX=9606 GN=DDX17 PE=1 SV=2	30	30	57227000000	2180000000	1573800000	1788400000	2070500000	1706400000	2871700000	3889600000	2732500000	3274500000	2980800000	1869500000	3400400000	2345400000	2164600000	2978500000	3159700000	2861600000	1641400000	3522200000	3252400000	2365700000	2597900000	2264400000	2123500000	2323100000	2235900000	2143800000	3299000000	3499000000	3260800000	3656200000	3442200000	3173400000	3605100000	3276000000	3173500000	3233900000	3364100000	3447100000	3312300000	3550100000	3433900000	3429800000
FUBP1	Q96AE4	Q96AE4	sp|Q96AE4|FUBP1_HUMAN Far upstream element-binding protein 1 OS=Homo sapiens OX=9606 GN=FUBP1 PE=1 SV=3	30	31	56522000000	2024800000	1703200000	1963400000	2086000000	1962000000	2572100000	3332400000	3478500000	3146500000	3268300000	1820700000	3252000000	2379200000	2245100000	2426200000	3020900000	2714000000	1791200000	3291700000	3305500000	2353000000	2385400000	2151900000	2149100000	2454000000	2175800000	2471200000	3064600000	3128700000	3569000000	3591500000	3529500000	3160300000	3264900000	3566700000	3390900000	2883900000	3221500000	3426800000	3757700000	3393800000	3561100000	3418200000
P4HB	P07237	P07237	sp|P07237|PDIA1_HUMAN Protein disulfide-isomerase OS=Homo sapiens OX=9606 GN=P4HB PE=1 SV=3	42	42	56104000000	2785800000	2951100000	2335600000	2502800000	2050400000	3106000000	3097100000	2514700000	3105300000	2508700000	1566900000	2553000000	2295300000	2251300000	2730900000	2703200000	2733500000	1581400000	3469100000	2711700000	2035000000	2515100000	2962000000	3806100000	2919500000	2859500000	2770800000	3077800000	2933100000	2771900000	3038100000	3019900000	2822000000	2889800000	3117600000	3222700000	2813300000	2932100000	3091900000	3045700000	3163500000	2871400000	2882500000
DPYSL5	Q9BPU6	Q9BPU6	sp|Q9BPU6|DPYL5_HUMAN Dihydropyrimidinase-related protein 5 OS=Homo sapiens OX=9606 GN=DPYSL5 PE=1 SV=1	32	32	55379000000	208690000	193460000	300300000	119900000	295220000	3316600000	3707400000	3419400000	3288000000	3346200000	3319200000	3398900000	2976400000	2827400000	2914000000	3140700000	3381800000	2582700000	3295200000	3125600000	3001400000	3220300000	225230000	0	0	0	380890000	3917800000	4073900000	4219000000	4300700000	4232700000	3800400000	3874500000	3653500000	3798700000	3512300000	3989600000	3971500000	4151300000	3769900000	4203000000	4157800000
CCT5	P48643	P48643	sp|P48643|TCPE_HUMAN T-complex protein 1 subunit epsilon OS=Homo sapiens OX=9606 GN=CCT5 PE=1 SV=1	39	39	55340000000	3789800000	2441900000	2725400000	3891800000	3034900000	2290400000	3015600000	2416000000	2739000000	2727200000	1826600000	2923900000	1838700000	1738800000	2359800000	2523700000	2246600000	1429700000	3123300000	2641200000	1626800000	1989100000	3557000000	2939000000	3201600000	3770000000	3457600000	2692900000	2867000000	2917400000	2746300000	2846700000	2613300000	2947300000	2825900000	2756300000	2795500000	2859700000	2810300000	2692900000	3010700000	2890100000	2684900000
CCT3	P49368	P49368	sp|P49368|TCPG_HUMAN T-complex protein 1 subunit gamma OS=Homo sapiens OX=9606 GN=CCT3 PE=1 SV=4	36	36	55277000000	3430600000	2275900000	2492000000	3498500000	2739400000	2631600000	3158000000	2475700000	2420400000	2526100000	1740700000	2760100000	2115900000	2060700000	2595500000	2697200000	2527900000	1415300000	2992200000	2654100000	1927500000	2142100000	3416700000	2620500000	2798700000	3726000000	3102000000	2794100000	2892200000	3110700000	2866600000	2843100000	2666300000	3106700000	2891500000	2713900000	2712900000	2970100000	2980400000	2755700000	3090300000	2958500000	2724900000
SRSF1	Q07955	Q07955	sp|Q07955|SRSF1_HUMAN Serine/arginine-rich splicing factor 1 OS=Homo sapiens OX=9606 GN=SRSF1 PE=1 SV=2	22	22	54116000000	2047200000	1581500000	1996600000	2049200000	1741200000	2838500000	3215700000	2240500000	2564600000	2646000000	2291700000	2751600000	2478300000	2505900000	2775000000	2591600000	2682300000	1765000000	2982300000	3069300000	2519200000	2782900000	2087500000	2103500000	2573600000	2081000000	2263200000	2869800000	2856800000	2992600000	2656800000	3047400000	3320800000	2981900000	3071500000	3235000000	3020700000	2968500000	3187800000	2863700000	2872000000	3367500000	3288500000
SERPINH1	P50454	P50454	sp|P50454|SERPH_HUMAN Serpin H1 OS=Homo sapiens OX=9606 GN=SERPINH1 PE=1 SV=2	25	25	53970000000	4210900000	4531500000	3148800000	4340200000	3077900000	2407300000	2628000000	1589300000	2119600000	1987400000	1358700000	2262000000	1816900000	1607900000	2609000000	2458600000	1771500000	1336500000	2779900000	2412900000	1499400000	2016100000	4032700000	5368300000	3698800000	4245300000	3409000000	2484500000	2582800000	2331900000	2285300000	2489000000	2002500000	2633000000	2415300000	2244900000	2646100000	2757000000	2266500000	2005200000	2846500000	2707400000	2003300000
HSPA1B;HSPA1A	P0DMV9;P0DMV8	P0DMV9;P0DMV8	sp|P0DMV9|HS71B_HUMAN Heat shock 70 kDa protein 1B OS=Homo sapiens OX=9606 GN=HSPA1B PE=1 SV=1;sp|P0DMV8|HS71A_HUMAN Heat shock 70 kDa protein 1A OS=Homo sapiens OX=9606 GN=HSPA1A PE=1 SV=1	24	38	53868000000	1755600000	1005600000	1187700000	1913800000	1254000000	2591200000	3678800000	2755200000	3419500000	3353800000	1933700000	3367800000	2246200000	2157100000	2569000000	3165700000	2797500000	1626400000	3333600000	3130800000	2205200000	2419700000	1951000000	1463600000	1614100000	2113100000	1826500000	2983100000	3438000000	3507600000	3781900000	3679000000	3142800000	3426600000	3074900000	3050200000	2966900000	3503100000	3323300000	2827700000	3331600000	3490800000	3011500000
TNPO1	Q92973	Q92973	sp|Q92973|TNPO1_HUMAN Transportin-1 OS=Homo sapiens OX=9606 GN=TNPO1 PE=1 SV=2	21	25	53567000000	2338200000	2595100000	1445200000	2083000000	1586900000	2647300000	3201800000	2154300000	2593600000	2601100000	1982800000	3449300000	2300900000	1920300000	2740600000	3118000000	2781000000	1587200000	2951100000	3075000000	2164800000	2249100000	2920200000	2408100000	2785300000	2828500000	2724600000	3099800000	2995500000	2898800000	2888100000	3143400000	2942300000	3209900000	3077800000	2827200000	2984000000	2991700000	3119100000	2684600000	2983400000	3097700000	3005100000
MDH2	P40926	P40926	sp|P40926|MDHM_HUMAN Malate dehydrogenase, mitochondrial OS=Homo sapiens OX=9606 GN=MDH2 PE=1 SV=3	19	19	53291000000	3492200000	4394400000	2716400000	3245100000	2533800000	2520200000	2967000000	1997900000	2155500000	2066900000	1645500000	2352400000	1866500000	1673100000	2804200000	2729900000	2090100000	1284900000	3090700000	2234000000	1613700000	1816500000	3432200000	5008800000	3141500000	3222600000	2921800000	2759000000	2740200000	2648600000	2498300000	2503500000	2616300000	2585800000	2560500000	2622100000	2917300000	2926900000	2663900000	2628000000	2927700000	2502400000	2499400000
IPO5	O00410;O60518	O00410	sp|O00410|IPO5_HUMAN Importin-5 OS=Homo sapiens OX=9606 GN=IPO5 PE=1 SV=4	50	50	52537000000	3333100000	1725300000	2829400000	3169500000	2677100000	2216100000	3177400000	2012700000	2846200000	2489600000	1347500000	2799400000	1718600000	1694200000	2776200000	2730400000	2374300000	1047700000	2885900000	2954600000	1647000000	2084900000	3293200000	2385600000	3215000000	3280900000	3295400000	2627100000	2907100000	2626200000	2992800000	2874100000	2565300000	2881100000	2550700000	2498200000	2795600000	2941500000	2794300000	2270600000	2930300000	2982000000	2530900000
MAPRE1	Q15691	Q15691	sp|Q15691|MARE1_HUMAN Microtubule-associated protein RP/EB family member 1 OS=Homo sapiens OX=9606 GN=MAPRE1 PE=1 SV=3	16	17	52433000000	1977100000	1271100000	2444300000	3332000000	1664000000	2831000000	3997700000	2776100000	2130000000	3492000000	1848300000	1783300000	1397300000	2289000000	2981500000	1829800000	2933100000	1742800000	3195700000	2010900000	2142200000	2364100000	2606800000	2023900000	2489600000	2491200000	2723800000	3038500000	3130700000	3248800000	3228900000	3248000000	2898000000	2721000000	2893900000	3121600000	2790400000	2843700000	3263000000	3258200000	2936800000	2938600000	2978000000
PCNA	P12004	P12004	sp|P12004|PCNA_HUMAN Proliferating cell nuclear antigen OS=Homo sapiens OX=9606 GN=PCNA PE=1 SV=1	15	15	52070000000	1985300000	1158700000	1745700000	2074600000	1477400000	2973400000	3032200000	2258000000	2356300000	2406100000	2278300000	2663700000	2214800000	2432000000	2572500000	2883800000	2736200000	1650300000	3468000000	2726600000	2457500000	2518100000	2063100000	1808100000	2352500000	2228100000	2094500000	3528100000	2897200000	2533800000	2833100000	2882300000	3680000000	2784100000	3055100000	3354800000	3260000000	3128700000	3125500000	3360800000	3595100000	3020800000	3298400000
HSPA6	P17066;P48741	P17066	sp|P17066|HSP76_HUMAN Heat shock 70 kDa protein 6 OS=Homo sapiens OX=9606 GN=HSPA6 PE=1 SV=2	1	1	51457000000	3118000000	2612700000	2870500000	3166300000	2792600000	2323500000	2557800000	1744000000	2245600000	2460800000	1715500000	2062700000	1914300000	2307900000	2324400000	2574700000	1986900000	1479900000	2640500000	2395300000	1971400000	2191800000	0	0	0	0	0	0	0	0	0	0	0	0	0	0	0	0	0	0	0	0	0
PAICS	P22234	P22234	sp|P22234|PUR6_HUMAN Bifunctional phosphoribosylaminoimidazole carboxylase/phosphoribosylaminoimidazole succinocarboxamide synthetase OS=Homo sapiens OX=9606 GN=PAICS PE=1 SV=3	31	31	51349000000	3553000000	2078100000	2423100000	3261000000	2647500000	2169100000	3034000000	2175000000	2493300000	2271300000	1379500000	2815800000	1718200000	1610000000	2352300000	2641000000	2271700000	1386200000	2671100000	2730800000	1667400000	1999900000	3443200000	2559900000	2976100000	3380800000	3489200000	2511500000	2829200000	2630200000	2712100000	2480900000	2364400000	2814100000	2326000000	2290800000	2699200000	2695300000	2504700000	2527700000	2679000000	2870300000	2416100000
PGAM1	P18669;P15259;Q8N0Y7	P18669	sp|P18669|PGAM1_HUMAN Phosphoglycerate mutase 1 OS=Homo sapiens OX=9606 GN=PGAM1 PE=1 SV=2	17	17	50774000000	4051900000	3035700000	3033300000	5013700000	4248700000	1472300000	3179300000	2135800000	2628200000	2254500000	1082100000	2363400000	1329300000	1215400000	1628100000	2755300000	1825800000	802790000	1940700000	1997600000	1407000000	1372300000	4003400000	3626500000	3421400000	4785500000	4609300000	1799200000	3190100000	2976800000	2929100000	2729000000	1454500000	2746400000	1880900000	1780700000	1933300000	3231800000	2233100000	1620700000	2023400000	2151800000	1984200000
PPP2R1A	P30153	P30153	sp|P30153|2AAA_HUMAN Serine/threonine-protein phosphatase 2A 65 kDa regulatory subunit A alpha isoform OS=Homo sapiens OX=9606 GN=PPP2R1A PE=1 SV=4	28	33	50715000000	2604700000	1599300000	1918200000	2584000000	1966100000	2519000000	3102200000	2149000000	2635600000	2722400000	1570000000	2676900000	1897000000	1934600000	2651200000	2479800000	2377700000	1349500000	3014300000	2894900000	1926200000	2142100000	2746100000	2092200000	2464200000	2893100000	2526700000	2783700000	3054200000	2551100000	3048500000	2842500000	2485700000	2864600000	2729000000	2885600000	2875100000	2830200000	2938800000	2515100000	3023000000	3238700000	2719100000
RCC2	Q9P258	Q9P258	sp|Q9P258|RCC2_HUMAN Protein RCC2 OS=Homo sapiens OX=9606 GN=RCC2 PE=1 SV=2	25	25	49962000000	4765800000	3977400000	4167400000	4767800000	4099700000	1725000000	2249700000	1784200000	1683100000	1754900000	1096200000	2189700000	1271500000	1343600000	1779800000	1949100000	1650700000	1025300000	2281100000	1854100000	1351700000	1194100000	4752100000	4701500000	4723800000	4737300000	4774800000	1938600000	2143700000	2150500000	1781600000	2028800000	1927400000	2315600000	1928400000	1917800000	1925800000	2255300000	2031700000	2010600000	2209500000	2009900000	2118900000
GDI2	P50395	P50395	sp|P50395|GDIB_HUMAN Rab GDP dissociation inhibitor beta OS=Homo sapiens OX=9606 GN=GDI2 PE=1 SV=2	30	41	49285000000	3347700000	1780600000	2243600000	3380900000	2503800000	2024300000	3253800000	2332900000	3262000000	2653900000	1270800000	2300800000	1624700000	1490400000	1945000000	2553300000	2295100000	928070000	2492000000	2441400000	1508800000	1651000000	3123100000	2394100000	3009400000	2974900000	3070800000	2353400000	2867600000	2864100000	3336100000	2861400000	2135200000	2451600000	2360400000	2327700000	2314000000	2569900000	2753000000	2114400000	2456700000	2825600000	2380200000
PABPC1	P11940;Q9H361;Q4VXU2;Q96DU9	P11940	sp|P11940|PABP1_HUMAN Polyadenylate-binding protein 1 OS=Homo sapiens OX=9606 GN=PABPC1 PE=1 SV=2	26	38	48692000000	3983800000	2853100000	3215600000	4025500000	3066100000	2031800000	2437700000	1594400000	1964700000	1960500000	1079200000	2151700000	1554000000	1508400000	2138000000	2216300000	1977800000	968600000	2452600000	2114100000	1529400000	1869100000	3764700000	3237600000	3783700000	3741800000	3607300000	2509400000	2205600000	2261200000	2296300000	2295100000	2130800000	2199900000	2377000000	2281400000	2278000000	2320900000	2324900000	2309000000	2432400000	2229200000	2406500000
TUBB3	Q13509	Q13509	sp|Q13509|TBB3_HUMAN Tubulin beta-3 chain OS=Homo sapiens OX=9606 GN=TUBB3 PE=1 SV=2	14	18	48531000000	765180000	303770000	541490000	798530000	662030000	2418000000	3633700000	3554300000	3659400000	3599900000	1452300000	3082800000	2193400000	1905000000	2221900000	3003800000	3242200000	1145200000	3075200000	2905000000	1982400000	2385200000	682220000	428140000	553950000	715510000	637270000	2271000000	3024100000	3790500000	3454900000	3785200000	2119700000	2897900000	2895400000	2614800000	2035300000	2889500000	3504700000	2150500000	2615300000	2893200000	2591200000
PDIA4	P13667	P13667	sp|P13667|PDIA4_HUMAN Protein disulfide-isomerase A4 OS=Homo sapiens OX=9606 GN=PDIA4 PE=1 SV=2	47	47	48220000000	3491500000	3451900000	2884800000	3386900000	2294800000	2124800000	2671000000	1976800000	2254200000	2028100000	921110000	2076400000	1745100000	1591700000	2125400000	2210400000	1972000000	1174200000	2491400000	2355600000	1189400000	1802400000	3391900000	4550100000	3507900000	3207100000	3118100000	2285400000	2368100000	2059700000	2482700000	2171400000	2182700000	2045200000	2356100000	2445600000	2232300000	2137800000	2327700000	2422200000	2310900000	2335100000	2144000000
RPS4X	P62701	P62701	sp|P62701|RS4X_HUMAN 40S ribosomal protein S4, X isoform OS=Homo sapiens OX=9606 GN=RPS4X PE=1 SV=2	9	20	48015000000	4766200000	3223400000	3559100000	4311400000	4249000000	2071100000	2256400000	1125900000	1316800000	1293700000	1138100000	1929900000	1297300000	1377300000	2479200000	1938500000	1558700000	970040000	2398400000	1873400000	1296800000	1584600000	4630700000	3504100000	3931300000	3972300000	4787100000	2733200000	2105500000	1692300000	1602800000	1776900000	2262400000	2169000000	1891200000	2158200000	2707300000	2224400000	2078500000	1874000000	2298200000	2063700000	1896000000
DBN1	Q16643	Q16643	sp|Q16643|DREB_HUMAN Drebrin OS=Homo sapiens OX=9606 GN=DBN1 PE=1 SV=4	26	26	47581000000	2524900000	1928700000	2223500000	2324700000	2142600000	2142600000	2822200000	2073000000	2929600000	2546200000	1519500000	2278300000	1828400000	1690000000	2200700000	2444000000	2350700000	1223000000	2703600000	2221500000	1587700000	1875100000	2609900000	2522800000	2853100000	2404000000	2769200000	2354100000	2519800000	2668400000	3124600000	2902800000	2409100000	2453300000	2674200000	2545900000	2325000000	2513700000	2884500000	2116200000	2604400000	2638000000	2655600000
HIST1H1E	P10412;P22492;Q02539	P10412	sp|P10412|H14_HUMAN Histone H1.4 OS=Homo sapiens OX=9606 GN=H1-4 PE=1 SV=2	3	12	46860000000	3082300000	3927900000	825190000	3160200000	4327100000	1377900000	2626800000	1025200000	1094600000	1420700000	3814800000	6125700000	1061400000	1056400000	1980200000	1954700000	972530000	798270000	1847000000	1829600000	1693900000	857710000	3336600000	4845200000	1158900000	3448700000	5648700000	1656400000	2378400000	1262600000	1381500000	1628000000	6154700000	5786800000	1536100000	1525300000	2487800000	2173900000	1152700000	1579500000	1976900000	1791400000	2318800000
DDX39B	Q13838	Q13838	sp|Q13838|DX39B_HUMAN Spliceosome RNA helicase DDX39B OS=Homo sapiens OX=9606 GN=DDX39B PE=1 SV=1	13	28	46637000000	1910200000	1495700000	1888300000	2073200000	1720500000	2436000000	2652200000	2209500000	2523200000	2227300000	1512600000	2321500000	1768400000	1649000000	2833100000	2503600000	2162000000	1259900000	2963900000	2742600000	1718600000	2065300000	1899300000	1628500000	2076600000	2033000000	1866000000	2301300000	2550200000	2542900000	2569400000	2491100000	2390000000	2628400000	2392800000	2390800000	2980700000	2669100000	2596500000	2137900000	2768700000	2877000000	2447900000
SF3B1	O75533	O75533	sp|O75533|SF3B1_HUMAN Splicing factor 3B subunit 1 OS=Homo sapiens OX=9606 GN=SF3B1 PE=1 SV=3	59	59	46393000000	2270000000	2587600000	1633100000	2115800000	1817800000	2221500000	2906100000	1823900000	2532700000	2577400000	1647200000	2797100000	1586800000	1532100000	2159500000	2402900000	2005500000	1031100000	2694800000	2812700000	1580100000	1657400000	2179800000	2691100000	2253400000	2238200000	2236400000	2327700000	2638200000	2328000000	2739200000	2784500000	2624700000	2581300000	2339700000	2376000000	2487700000	2568900000	2460100000	2134100000	2552700000	2623900000	2409300000
EEF1G	P26641	P26641	sp|P26641|EF1G_HUMAN Elongation factor 1-gamma OS=Homo sapiens OX=9606 GN=EEF1G PE=1 SV=3	20	20	46148000000	2443000000	1746800000	2293000000	2318800000	2149200000	2306900000	2538700000	1833800000	2303600000	2163200000	1309400000	2309500000	1824500000	1624900000	2455900000	2343700000	2015300000	1440600000	2840800000	2442100000	1738100000	1705500000	2445300000	2255700000	2849900000	2436300000	2482200000	2446200000	2322600000	2425400000	2536200000	2424300000	2159800000	2542800000	2526300000	2470200000	2556000000	2609400000	2407700000	2451300000	2636800000	2630500000	2399900000
RPL3	P39023;Q92901	P39023	sp|P39023|RL3_HUMAN 60S ribosomal protein L3 OS=Homo sapiens OX=9606 GN=RPL3 PE=1 SV=2	25	25	46049000000	4074600000	2714100000	3267000000	3741300000	2829400000	1827900000	2172000000	1785200000	1645300000	1907200000	1370200000	2126100000	1360400000	1266700000	1968500000	1829300000	1990600000	1237200000	2322200000	1923100000	1239400000	1451000000	3660500000	3443300000	4021500000	3419800000	3755500000	2258600000	2006400000	1923000000	1828700000	2018300000	2333500000	2121300000	2075800000	2006100000	2229300000	2050000000	2075600000	2491300000	2291900000	2001000000	1926800000
HMGB2	P26583	P26583	sp|P26583|HMGB2_HUMAN High mobility group protein B2 OS=Homo sapiens OX=9606 GN=HMGB2 PE=1 SV=2	13	13	44899000000	663090000	442200000	350060000	682030000	405650000	2366500000	3863400000	2642900000	2644300000	2519700000	1106200000	3687600000	1927200000	1675700000	3277400000	3238600000	2167300000	729920000	3525300000	3150500000	1889300000	1943800000	790380000	716900000	656850000	768560000	653460000	2664900000	3459000000	2979700000	2885100000	2838200000	2673200000	3758000000	2743800000	2504000000	3733300000	3286300000	2596100000	1999200000	3279500000	3331600000	2729400000
PCBP2	Q15366	Q15366	sp|Q15366|PCBP2_HUMAN Poly(rC)-binding protein 2 OS=Homo sapiens OX=9606 GN=PCBP2 PE=1 SV=1	10	11	44642000000	2091300000	1307600000	1832500000	1873100000	1411500000	2363500000	2771100000	1987200000	2004900000	2234000000	1609500000	2593700000	1588800000	1590400000	2681800000	2542100000	2260300000	1227500000	2806600000	2441000000	1740800000	1682900000	2039100000	1686000000	2246900000	1878100000	1807500000	2622700000	2841700000	2603800000	2160100000	2473000000	2743400000	2699300000	2404300000	2387800000	2836300000	2739100000	2565100000	2484200000	2900400000	2705400000	2578300000
RPL6	Q02878	Q02878	sp|Q02878|RL6_HUMAN 60S ribosomal protein L6 OS=Homo sapiens OX=9606 GN=RPL6 PE=1 SV=3	20	20	44538000000	4973700000	3865700000	4064000000	4912200000	4427900000	986680000	2202200000	1093300000	1513900000	1281000000	1119200000	1461200000	915800000	916130000	2044600000	1195200000	1249500000	601030000	2218400000	1569500000	942380000	984060000	4905300000	4720800000	4803700000	4642200000	5041900000	1284900000	2108000000	1436400000	1687000000	1579000000	1884200000	1803400000	1518200000	1434600000	2177100000	1487400000	1614000000	1097400000	2217600000	1755400000	1419600000
NAP1L1	P55209	P55209	sp|P55209|NP1L1_HUMAN Nucleosome assembly protein 1-like 1 OS=Homo sapiens OX=9606 GN=NAP1L1 PE=1 SV=1	15	17	44434000000	2106000000	1381700000	1406200000	1965900000	1418200000	2038300000	2892900000	2281400000	2324100000	2203500000	1160000000	2694800000	1891000000	1828500000	2229100000	2355800000	2242500000	1108100000	2773400000	2472800000	1543900000	2115600000	2071900000	1602800000	1855400000	1957200000	1806800000	2288000000	2572900000	2814400000	2385500000	2444200000	1989100000	2731800000	2579200000	2567000000	2229000000	2555900000	2629400000	2165000000	2575800000	2582400000	2354800000
RPS12	P25398	P25398	sp|P25398|RS12_HUMAN 40S ribosomal protein S12 OS=Homo sapiens OX=9606 GN=RPS12 PE=1 SV=3	13	13	44258000000	3450900000	2082600000	2382200000	3001100000	2440100000	1919700000	2339100000	1657000000	1890600000	1861600000	1078100000	2192300000	1347800000	1508000000	1974300000	2263500000	1907800000	817620000	2822400000	2087900000	1367800000	1865100000	3140000000	2665000000	2868500000	2839200000	2920400000	2210200000	2132600000	2108700000	2004000000	2108200000	2077600000	2264600000	2076400000	2301900000	2065300000	2323000000	2272400000	2095500000	2690300000	2207000000	1999600000
CCT6A	P40227	P40227	sp|P40227|TCPZ_HUMAN T-complex protein 1 subunit zeta OS=Homo sapiens OX=9606 GN=CCT6A PE=1 SV=3	21	26	43790000000	2655700000	1721400000	2044400000	2626600000	2099100000	2148800000	2319500000	2017000000	1885500000	1831400000	1531500000	2253000000	1768700000	1728500000	1952500000	2065700000	2102900000	1439400000	2404000000	2004700000	1531200000	1658200000	2843300000	2189100000	2541700000	2737600000	2688800000	2378300000	2285200000	2489900000	2263800000	2192900000	2129000000	2428500000	2534900000	2525700000	2285100000	2311000000	2416500000	2595500000	2386300000	2342300000	2250500000
MCM6	Q14566	Q14566	sp|Q14566|MCM6_HUMAN DNA replication licensing factor MCM6 OS=Homo sapiens OX=9606 GN=MCM6 PE=1 SV=1	40	40	43241000000	2606200000	2084000000	2036300000	2516300000	2217500000	2151400000	2287300000	1259000000	1915300000	1893100000	1482300000	2301100000	1512100000	1612300000	2265300000	2099300000	1694400000	1232300000	2472200000	2153800000	1544400000	1905000000	2471700000	2404600000	2596000000	2609900000	2527800000	2465600000	2132100000	1948300000	2042100000	2221100000	2490000000	2409800000	2220700000	2305800000	2453100000	2301000000	2098300000	2307500000	2597900000	2336100000	2517100000
PSAP	P07602	P07602	sp|P07602|SAP_HUMAN Prosaposin OS=Homo sapiens OX=9606 GN=PSAP PE=1 SV=2	18	18	43092000000	1572100000	1492000000	1235200000	1458000000	1204900000	1963300000	3201800000	2155800000	3433100000	2196200000	1282600000	2274400000	1628900000	1640400000	1928200000	2120600000	2529800000	1058900000	2386500000	2669200000	1572800000	2087900000	1630600000	1894200000	1640600000	1706700000	1616400000	2161000000	2678800000	2667500000	3435800000	2775300000	2048800000	2413200000	2739200000	2555100000	2018100000	2139900000	3098400000	2138100000	1850100000	2712600000	2320600000
KHDRBS1	Q07666;Q5VWX1	Q07666	sp|Q07666|KHDR1_HUMAN KH domain-containing, RNA-binding, signal transduction-associated protein 1 OS=Homo sapiens OX=9606 GN=KHDRBS1 PE=1 SV=1	11	12	43052000000	1399500000	1544500000	1646100000	1369800000	1140900000	2254100000	2481000000	2535200000	2089900000	2380900000	1394300000	2477900000	2029100000	1797900000	2320800000	2491800000	1947400000	1487300000	2766600000	1923700000	1604700000	1968900000	1637000000	1810300000	1979900000	1551500000	1664600000	2469200000	2239200000	2671100000	2564600000	2417100000	2258600000	2308100000	2775500000	2552500000	2597500000	2390300000	2215900000	3105100000	2525400000	2209300000	2347600000
VCL	P18206	P18206	sp|P18206|VINC_HUMAN Vinculin OS=Homo sapiens OX=9606 GN=VCL PE=1 SV=4	55	55	42569000000	7462800000	3837100000	4709900000	7125700000	5011800000	870600000	1134300000	970310000	916830000	992710000	683040000	854130000	617680000	680230000	898430000	888680000	957140000	489240000	1081200000	992690000	713410000	680670000	6338200000	3978200000	5244600000	6334300000	5595900000	1304600000	1257000000	1302500000	1337500000	1262600000	1306000000	1132600000	1127800000	1215000000	1214900000	1217500000	1329900000	1374400000	1281200000	1286300000	1235500000
HNRNPA0	Q13151	Q13151	sp|Q13151|ROA0_HUMAN Heterogeneous nuclear ribonucleoprotein A0 OS=Homo sapiens OX=9606 GN=HNRNPA0 PE=1 SV=1	12	12	42521000000	1417400000	1499400000	1297100000	1496000000	1413100000	1969400000	2829600000	2365700000	2408000000	2317600000	1435300000	2388100000	1882000000	1727200000	2180900000	2136100000	2180300000	1200800000	2610500000	2222800000	1585300000	1958300000	1274800000	1553600000	1358600000	1387400000	1221900000	1777800000	2092500000	2603000000	2174300000	2221200000	1628300000	2245400000	1940600000	1986400000	2011300000	2093300000	2200500000	2187600000	2089800000	1985700000	1946300000
PDIA6	Q15084	Q15084	sp|Q15084|PDIA6_HUMAN Protein disulfide-isomerase A6 OS=Homo sapiens OX=9606 GN=PDIA6 PE=1 SV=1	20	20	42480000000	2361000000	2809900000	1885700000	2457200000	1777400000	1824000000	2393900000	2170100000	1975300000	2179300000	1062600000	2212400000	1447600000	1540900000	1811000000	2252800000	2066900000	1007200000	2140600000	1970300000	1425000000	1709400000	2487000000	3259000000	2465700000	2631000000	2293100000	2157200000	2319900000	2456200000	2234100000	2321500000	1763500000	2195000000	2216000000	2304700000	2087200000	2272200000	2313600000	2179200000	2164600000	2274700000	2077800000
ACTN4	O43707	O43707	sp|O43707|ACTN4_HUMAN Alpha-actinin-4 OS=Homo sapiens OX=9606 GN=ACTN4 PE=1 SV=2	37	56	42234000000	3665000000	2164800000	2442600000	3344900000	2372700000	1574000000	2167000000	1451500000	1958900000	1745300000	1146700000	1992000000	1338100000	1322700000	1600100000	2172100000	1802300000	950420000	2029700000	2085100000	1338300000	1569400000	3339700000	2531300000	2699400000	3128900000	2786200000	1847300000	2115400000	2007700000	2210000000	2055900000	1940300000	2133700000	1971000000	1881600000	1832300000	2256100000	2026500000	1996700000	2110000000	2183500000	1972300000
RPL10	P27635;Q96L21	P27635	sp|P27635|RL10_HUMAN 60S ribosomal protein L10 OS=Homo sapiens OX=9606 GN=RPL10 PE=1 SV=5	15	15	42176000000	3630700000	2728700000	2964100000	3429400000	3210300000	1771500000	2162600000	1292900000	1491200000	1578600000	1281400000	1786700000	1427500000	1043300000	1810400000	1758500000	1509900000	1245900000	1990000000	1574500000	1118600000	1369800000	3628200000	3434000000	3583500000	3478900000	3841400000	2026700000	1977000000	1654500000	1600900000	1873900000	2000500000	1991400000	1993000000	1764500000	2101600000	1948100000	1918100000	1794500000	1994200000	1972300000	1674000000
IDH2	P48735	P48735	sp|P48735|IDHP_HUMAN Isocitrate dehydrogenase [NADP], mitochondrial OS=Homo sapiens OX=9606 GN=IDH2 PE=1 SV=2	26	27	42131000000	562610000	844870000	443920000	577430000	475580000	2537100000	3130600000	1935700000	2274200000	2091900000	1833400000	3131100000	1684100000	1641700000	3022000000	3023200000	2048400000	1155500000	3225700000	2839000000	1814600000	1838100000	579160000	945750000	538080000	534850000	493010000	2817200000	2878600000	2616000000	2316700000	2428100000	3142200000	3177800000	2477200000	2449300000	3044900000	3233200000	2437900000	2619700000	3055300000	3043500000	2653500000
FABP7	O15540	O15540	sp|O15540|FABP7_HUMAN Fatty acid-binding protein, brain OS=Homo sapiens OX=9606 GN=FABP7 PE=1 SV=3	11	11	41784000000	42546000	28761000	31778000	38056000	52452000	3112000000	3277500000	981690000	1721100000	1737900000	2124500000	3593900000	1749300000	1685600000	3871600000	3302400000	1313600000	1472900000	4641500000	3323300000	1547500000	2133800000	52793000	44005000	45972000	52808000	81909000	3716200000	2928700000	1269700000	1824100000	2058200000	3792400000	3551500000	2470100000	2433300000	3857500000	3359100000	1598600000	3270300000	4568000000	3603600000	2365600000
MTHFD1	P11586	P11586	sp|P11586|C1TC_HUMAN C-1-tetrahydrofolate synthase, cytoplasmic OS=Homo sapiens OX=9606 GN=MTHFD1 PE=1 SV=4	45	46	41437000000	3641900000	2643200000	2743600000	3629900000	3097400000	1738000000	1795800000	1271400000	1540500000	1695600000	1282000000	1647600000	1270300000	1384300000	1871000000	1504300000	1431600000	881190000	1973600000	1673800000	1296100000	1424000000	3511100000	2955400000	3217100000	3486400000	3536400000	2115500000	1864200000	1742800000	1850100000	1938000000	2079900000	1937900000	1801100000	1878900000	2111700000	1779700000	1820800000	1950000000	2056200000	1927600000	1990800000
RPS18	P62269	P62269	sp|P62269|RS18_HUMAN 40S ribosomal protein S18 OS=Homo sapiens OX=9606 GN=RPS18 PE=1 SV=3	17	17	41407000000	3978300000	2707900000	3810900000	4270700000	3639900000	1708500000	1725400000	1181900000	1401600000	1506600000	1208400000	1545600000	1193400000	1180400000	1427600000	1366300000	1437200000	862780000	1538300000	1385000000	1152800000	1177600000	3999800000	3153100000	4666700000	4293900000	4250000000	2097900000	1699300000	1576800000	1490600000	1740000000	2069600000	1737000000	1770500000	1918700000	1494900000	1548100000	1872300000	1703100000	1501400000	1458000000	1705400000
MCM7	P33993	P33993	sp|P33993|MCM7_HUMAN DNA replication licensing factor MCM7 OS=Homo sapiens OX=9606 GN=MCM7 PE=1 SV=4	38	38	40634000000	2249600000	1608400000	1520900000	2057900000	1617900000	2247300000	2088900000	1476900000	1659900000	1612900000	1445000000	2300300000	1700800000	1398000000	2404900000	2409900000	1706000000	1133100000	2505500000	2058600000	1690500000	1740700000	2218800000	2062100000	2151100000	2170700000	2225500000	2453900000	2056300000	2108800000	1827400000	1995500000	2269900000	2302300000	2349500000	2244700000	2438600000	2198700000	2040400000	2281800000	2402300000	2125400000	2353800000
CAND1	Q86VP6	Q86VP6	sp|Q86VP6|CAND1_HUMAN Cullin-associated NEDD8-dissociated protein 1 OS=Homo sapiens OX=9606 GN=CAND1 PE=1 SV=2	53	57	40623000000	1748300000	1197800000	1521300000	1776300000	1410400000	1903800000	2691000000	1769500000	2536300000	2150900000	1248200000	2312500000	1355100000	1252600000	2107100000	2416800000	1963300000	939020000	2410900000	2712300000	1528500000	1670700000	1952400000	1652100000	1841200000	1867700000	1946500000	2205100000	2449000000	2192300000	2613700000	2538300000	2069600000	2433300000	2059400000	2047000000	2285600000	2585300000	2238600000	2001200000	2401800000	2604000000	2283500000
RPL13	P26373	P26373	sp|P26373|RL13_HUMAN 60S ribosomal protein L13 OS=Homo sapiens OX=9606 GN=RPL13 PE=1 SV=4	14	14	40555000000	4837300000	3786700000	3732900000	4351000000	3746300000	1104000000	1540700000	802240000	934150000	958380000	1342100000	2178300000	875030000	996610000	1628800000	907810000	1084500000	647300000	2050500000	1243600000	939460000	867150000	4463200000	4609800000	4671000000	4136200000	4793300000	1350600000	1400100000	1163800000	1104500000	1115000000	2207600000	2247400000	1272200000	1570800000	1750300000	1082600000	1303800000	1348400000	1919500000	1429100000	1529100000
CAP1	Q01518	Q01518	sp|Q01518|CAP1_HUMAN Adenylyl cyclase-associated protein 1 OS=Homo sapiens OX=9606 GN=CAP1 PE=1 SV=5	28	29	40125000000	3032600000	2259800000	2669600000	2614800000	2408700000	1749600000	2544100000	1423400000	2349400000	1874600000	937460000	1755700000	1008400000	1140600000	1473100000	1576200000	1921600000	978980000	1615100000	2005100000	1307800000	1478100000	2687800000	2269000000	2905200000	2683200000	2795400000	1831200000	2137300000	2175800000	2289900000	2070600000	1823900000	1858600000	1788200000	1773200000	1583300000	1875600000	2122600000	2148600000	1862000000	2043900000	1966300000
PTBP1	P26599	P26599	sp|P26599|PTBP1_HUMAN Polypyrimidine tract-binding protein 1 OS=Homo sapiens OX=9606 GN=PTBP1 PE=1 SV=2	14	16	40035000000	2776200000	2124900000	2600200000	2195700000	2159500000	1552100000	1882700000	1764200000	1982700000	1809400000	1338300000	1607800000	1518000000	1591700000	1295800000	1796000000	2166400000	1182900000	1924300000	1543400000	1495500000	1727200000	3147000000	2796800000	2850900000	2627200000	2630900000	1882200000	1966800000	2044600000	2125300000	2103400000	1825700000	1823200000	1817700000	1888100000	1619400000	1887500000	2154000000	1870000000	1848400000	1903300000	1856200000
LIN28A	Q9H9Z2	Q9H9Z2	sp|Q9H9Z2|LN28A_HUMAN Protein lin-28 homolog A OS=Homo sapiens OX=9606 GN=LIN28A PE=1 SV=1	14	14	39962000000	3818500000	2888200000	2892300000	4010700000	3101100000	2043800000	1340700000	973750000	1011200000	1233800000	1310800000	1294200000	1199800000	1178000000	2117700000	1280200000	1188600000	1045500000	2174600000	1305500000	1234700000	1318900000	3697400000	3458100000	3419100000	3857800000	3448600000	2344400000	1224400000	1399500000	1071600000	1393800000	2053600000	1614000000	1639700000	1619300000	2265300000	1401300000	1476000000	1971200000	2217600000	1488600000	1743400000
PARK7	Q99497	Q99497	sp|Q99497|PARK7_HUMAN Parkinson disease protein 7 OS=Homo sapiens OX=9606 GN=PARK7 PE=1 SV=2	17	17	39827000000	2074100000	1227400000	1576900000	1909800000	1647600000	1727500000	2681500000	1854000000	2426400000	2293300000	1265000000	2036900000	1468300000	1410300000	1770700000	2108100000	1872300000	1011700000	2050500000	2222500000	1472000000	1720200000	2197400000	1610000000	2001900000	2065400000	2228500000	2143400000	2494600000	2175200000	2609200000	2523000000	2027300000	2090200000	1974300000	2066000000	1984000000	2287800000	2360500000	2143600000	2118500000	2390700000	2147500000
FUS	P35637	P35637	sp|P35637|FUS_HUMAN RNA-binding protein FUS OS=Homo sapiens OX=9606 GN=FUS PE=1 SV=1	9	11	39609000000	2351700000	1469600000	1999600000	2273400000	1480000000	1940600000	2528000000	1453900000	2344200000	1974500000	986930000	1847200000	1409500000	1295500000	1940300000	2203500000	1940700000	777680000	2163300000	2370600000	1292100000	1566000000	2003800000	1576300000	1801600000	1945200000	1625700000	1975300000	2318300000	2170400000	2509500000	2276200000	1698400000	2233300000	2173300000	1859100000	2065800000	2312400000	2339400000	1287700000	2368700000	2619500000	1853100000
TUFM	P49411	P49411	sp|P49411|EFTU_HUMAN Elongation factor Tu, mitochondrial OS=Homo sapiens OX=9606 GN=TUFM PE=1 SV=2	28	28	39596000000	2106100000	3086200000	1899400000	2045000000	1700800000	2013000000	2071900000	1452000000	1870000000	1747500000	1094900000	2119200000	1422400000	1251400000	2075700000	2091500000	1789200000	712550000	2233300000	2019000000	1378200000	1417200000	2132900000	3551200000	2247800000	2142500000	2230400000	2248000000	2016100000	1830200000	2018000000	1926200000	2133600000	2196500000	2045100000	1855600000	2264700000	2200000000	2072400000	1767700000	2196700000	2048600000	2069400000
SSB	P05455	P05455	sp|P05455|LA_HUMAN Lupus La protein OS=Homo sapiens OX=9606 GN=SSB PE=1 SV=2	30	30	39594000000	2377300000	1630300000	1814900000	2295000000	1940000000	1937900000	2330200000	1516300000	2026200000	1929200000	1153600000	1889200000	1384300000	1279100000	2020900000	1999000000	1645400000	1012200000	2189700000	2168300000	1468500000	1586200000	2313000000	2005000000	2490800000	2276700000	2340500000	2147800000	2245300000	1859000000	2333400000	2161600000	1780700000	2212800000	1779100000	1952500000	2222500000	2167700000	1958900000	1743500000	1992900000	2203900000	2147300000
BASP1	P80723	P80723	sp|P80723|BASP1_HUMAN Brain acid soluble protein 1 OS=Homo sapiens OX=9606 GN=BASP1 PE=1 SV=2	14	14	38721000000	1120300000	850130000	925220000	976710000	885270000	1663600000	2891200000	2308800000	3295300000	2708600000	1042700000	2228400000	1626800000	1544200000	1570400000	2218300000	2330700000	1076000000	1687100000	2366800000	1630200000	1774300000	1119300000	1057500000	1231200000	1066900000	1211100000	2009700000	2560200000	2794100000	3234500000	3201800000	2010800000	2424800000	2210600000	2385400000	1752100000	2642700000	2795400000	2238000000	1752900000	2444200000	2593400000
NUMA1	Q14980	Q14980	sp|Q14980|NUMA1_HUMAN Nuclear mitotic apparatus protein 1 OS=Homo sapiens OX=9606 GN=NUMA1 PE=1 SV=2	90	90	38712000000	2036800000	970730000	955460000	1163000000	759030000	1649700000	2333700000	1729900000	2451200000	1896400000	1079600000	2068200000	1256200000	1149400000	2164500000	3124800000	1928900000	846290000	4228700000	2427700000	1245300000	1246800000	1270300000	1535100000	1290800000	1174500000	1188200000	2115600000	2519000000	2177700000	2434400000	2438300000	2052000000	2351300000	2009000000	1982400000	2173600000	2446400000	2263600000	1966600000	2178400000	2652400000	2108800000
PHB	P35232	P35232	sp|P35232|PHB1_HUMAN Prohibitin 1 OS=Homo sapiens OX=9606 GN=PHB1 PE=1 SV=1	18	18	38609000000	1966800000	2865500000	1589600000	2066200000	1539900000	2060500000	2019000000	1452900000	1641500000	1613800000	1353300000	1670700000	1471700000	1537700000	2035400000	1876100000	1565100000	1260400000	2291700000	1701700000	1415500000	1614100000	2032300000	3433800000	2142700000	2125700000	2095500000	2406500000	1900700000	1784600000	1791800000	1875200000	2256600000	1742200000	2136600000	2345100000	2220000000	2075700000	1867000000	2478800000	2262200000	1814900000	2091900000
EIF5A;EIF5AL1;EIF5A2	P63241;Q6IS14;Q9GZV4	P63241;Q6IS14;Q9GZV4	sp|P63241|IF5A1_HUMAN Eukaryotic translation initiation factor 5A-1 OS=Homo sapiens OX=9606 GN=EIF5A PE=1 SV=2;sp|Q6IS14|IF5AL_HUMAN Eukaryotic translation initiation factor 5A-1-like OS=Homo sapiens OX=9606 GN=EIF5AL1 PE=2 SV=2;sp|Q9GZV4|IF5A2_HUMAN Eukar	16	16	38561000000	3317300000	1956900000	2310400000	3479800000	2567700000	1683800000	2166900000	1169700000	1739300000	1491500000	726230000	1709200000	1115000000	1080300000	1904200000	1579100000	1434300000	575340000	2347100000	1870900000	969070000	1367500000	3332800000	2471800000	2997400000	3425200000	3158400000	1803500000	1804600000	1390000000	1863000000	1546200000	1393400000	1561100000	1765100000	1547400000	2105800000	1521900000	1832200000	1530500000	1924000000	1795100000	1441100000
ST13;ST13P5;ST13P4	P50502;Q8NFI4;Q8IZP2	P50502;Q8NFI4;Q8IZP2	sp|P50502|F10A1_HUMAN Hsc70-interacting protein OS=Homo sapiens OX=9606 GN=ST13 PE=1 SV=2;sp|Q8NFI4|F10A5_HUMAN Putative protein FAM10A5 OS=Homo sapiens OX=9606 GN=ST13P5 PE=5 SV=1;sp|Q8IZP2|ST134_HUMAN Putative protein FAM10A4 OS=Homo sapiens OX=9606 GN=S	17	17	38467000000	1294600000	940670000	1090100000	1465700000	999610000	1815900000	1986300000	2253400000	1765300000	2192000000	1242800000	2260300000	1867100000	1732300000	1630200000	2152500000	2341400000	1464800000	2137500000	2312200000	1677300000	1845100000	1673100000	1359300000	1692300000	1645300000	1703400000	2153000000	2051600000	2358700000	2321600000	2303500000	2189800000	2168700000	2465200000	2423800000	1884900000	2323200000	2608600000	2350500000	2199200000	2535600000	2331100000
CCT4	P50991	P50991	sp|P50991|TCPD_HUMAN T-complex protein 1 subunit delta OS=Homo sapiens OX=9606 GN=CCT4 PE=1 SV=4	30	30	38418000000	2597200000	1729300000	2001300000	2757400000	2221200000	1769300000	2073300000	1571600000	1734200000	1590500000	1066500000	1879100000	1308500000	1375800000	1794900000	1768100000	1602800000	1102500000	1872800000	1653700000	1373100000	1574900000	2641600000	1983000000	2437900000	2920900000	2742700000	1867500000	1926300000	1994000000	1864000000	1828200000	1836100000	2007800000	1956100000	2032900000	2029100000	2013500000	2041800000	1901800000	1914000000	2007600000	1992500000
PSAT1	Q9Y617	Q9Y617	sp|Q9Y617|SERC_HUMAN Phosphoserine aminotransferase OS=Homo sapiens OX=9606 GN=PSAT1 PE=1 SV=2	21	21	38377000000	2870300000	1285600000	1446000000	3005200000	1998000000	1668500000	2236100000	1574700000	1923800000	1764000000	1053300000	1856600000	1308500000	1292200000	1891100000	1956700000	1685000000	1132000000	2027200000	1871600000	1198200000	1332200000	2939100000	1597600000	1716400000	3161500000	2445400000	2002400000	2124200000	2038900000	2132700000	1980000000	1827700000	1997000000	1944500000	1849000000	1976000000	2146500000	2055600000	1869600000	2003400000	2115700000	1910400000
RPS2	P15880	P15880	sp|P15880|RS2_HUMAN 40S ribosomal protein S2 OS=Homo sapiens OX=9606 GN=RPS2 PE=1 SV=2	12	12	38303000000	3542900000	2459000000	2850500000	3698600000	3036300000	1531900000	1908700000	1026900000	1281800000	1284100000	1057200000	1434400000	1055900000	1163500000	1786900000	1419400000	1247000000	1148100000	1690800000	1309500000	1015300000	1354400000	3435200000	2819700000	3425400000	3617900000	3538400000	1814900000	1776200000	1403600000	1398200000	1605800000	1833300000	1698700000	1700200000	1759900000	1969500000	1636600000	1540000000	1887500000	1705900000	1539900000	1732100000
CKAP4	Q07065	Q07065	sp|Q07065|CKAP4_HUMAN Cytoskeleton-associated protein 4 OS=Homo sapiens OX=9606 GN=CKAP4 PE=1 SV=2	41	41	38065000000	779970000	660290000	681550000	846150000	510750000	2277900000	2889200000	2153800000	1944100000	2369400000	1322800000	2613200000	1893400000	1552600000	2243000000	2446900000	1833900000	959690000	2258700000	2172400000	1686400000	1968900000	1134500000	1037700000	953210000	1036100000	871890000	2612700000	2369500000	2442700000	2128400000	2396200000	2328400000	2534600000	2474100000	2438600000	2500600000	2331500000	2257200000	2382600000	2322200000	2388600000	2535700000
ERH	P84090	P84090	sp|P84090|ERH_HUMAN Enhancer of rudimentary homolog OS=Homo sapiens OX=9606 GN=ERH PE=1 SV=1	9	9	37726000000	1528600000	1528200000	1244600000	1423100000	1209300000	1556600000	2124400000	2188800000	1751900000	1966700000	1203400000	2059900000	1878600000	1659500000	1773000000	1978400000	1894500000	1750000000	1956000000	1684800000	1660300000	1705300000	1588100000	1857700000	1407600000	1510000000	1322200000	2319100000	2164000000	2521600000	2054900000	2309500000	2087500000	2548400000	2384100000	2272800000	1793400000	2357500000	2489600000	2561800000	2109100000	1948700000	2482400000
G3BP1	Q13283	Q13283	sp|Q13283|G3BP1_HUMAN Ras GTPase-activating protein-binding protein 1 OS=Homo sapiens OX=9606 GN=G3BP1 PE=1 SV=1	17	19	37560000000	3084700000	2328100000	2552200000	2726600000	2481400000	1605000000	1899100000	1367200000	1653300000	1399000000	920970000	1502500000	1362800000	1299200000	1502800000	1492200000	1444800000	902770000	1847300000	1486500000	1278200000	1423700000	2824000000	2577400000	2803000000	2562900000	2632300000	1826700000	1650300000	1740100000	1661300000	1644300000	1574300000	1653800000	2006500000	1882700000	1632100000	1642100000	1774800000	1857200000	1864700000	1625300000	1850500000
RPS7	P62081	P62081	sp|P62081|RS7_HUMAN 40S ribosomal protein S7 OS=Homo sapiens OX=9606 GN=RPS7 PE=1 SV=1	16	16	37557000000	2801500000	1848200000	2324800000	2790500000	2291400000	1695800000	1833000000	1499500000	1469200000	1735000000	945430000	1896600000	1337000000	1145800000	1718300000	1884200000	1414800000	900980000	1857000000	1753900000	1088100000	1326000000	2842500000	2414700000	3135500000	2940800000	3007500000	2102700000	1777900000	1757400000	1703300000	1822300000	1809800000	1956900000	1738800000	1660900000	1871600000	1931200000	1607400000	1603200000	1909000000	1902800000	1485400000
RBBP4	Q09028	Q09028	sp|Q09028|RBBP4_HUMAN Histone-binding protein RBBP4 OS=Homo sapiens OX=9606 GN=RBBP4 PE=1 SV=3	7	13	37476000000	1488100000	1407100000	1443900000	1808400000	1234900000	1867400000	2611900000	1609300000	2315200000	1720700000	1028700000	1981400000	1376600000	1362600000	2161300000	2084000000	1753100000	864050000	2288200000	2229200000	1373900000	1466300000	1511400000	1735900000	1667800000	1768500000	1556400000	2061100000	2341800000	2202200000	2302000000	2268900000	1858700000	2162500000	2166200000	2172000000	2063200000	2129700000	2146700000	1976800000	2153900000	2274500000	2074600000
STMN1	P16949	P16949	sp|P16949|STMN1_HUMAN Stathmin OS=Homo sapiens OX=9606 GN=STMN1 PE=1 SV=3	10	14	37096000000	1097400000	678970000	788370000	1100100000	943320000	1452900000	2962300000	2826800000	3101600000	2740000000	968980000	1802600000	1772500000	1675700000	1307200000	1731200000	2355300000	1126500000	1406800000	2073300000	1580500000	1604000000	1168300000	834390000	950030000	1204400000	1113300000	1665000000	2271900000	3914900000	3258100000	3212700000	1489300000	1986200000	2394800000	2460300000	1551100000	2073500000	3265400000	2056800000	1459000000	2034000000	2472800000
PSMD2	Q13200	Q13200	sp|Q13200|PSMD2_HUMAN 26S proteasome non-ATPase regulatory subunit 2 OS=Homo sapiens OX=9606 GN=PSMD2 PE=1 SV=3	37	37	37079000000	1960300000	1236300000	1569400000	1863900000	1470000000	1927800000	2387600000	1449800000	2079700000	1735700000	1144700000	1870100000	1225200000	1178800000	2151000000	1983700000	1663700000	814330000	2508100000	2101600000	1299300000	1458000000	1986300000	1626500000	1930200000	1915800000	1798800000	2213600000	2085900000	1868100000	2122000000	1993000000	2026500000	2000200000	1932800000	1954300000	2161200000	2101400000	2033300000	1782900000	2289700000	2157100000	2004400000
YWHAG	P61981	P61981	sp|P61981|1433G_HUMAN 14-3-3 protein gamma OS=Homo sapiens OX=9606 GN=YWHAG PE=1 SV=2	16	16	36805000000	2034100000	1231800000	1459600000	1816800000	1524600000	1573500000	2134700000	1986600000	2197900000	1974900000	1083400000	1908600000	1416200000	1364900000	1559600000	1922900000	1817800000	1194700000	1778000000	1932700000	1388400000	1503100000	2005300000	1542200000	1970400000	1953900000	2053600000	1834800000	2124300000	2214800000	2351300000	2192000000	1933300000	1959000000	2075100000	2215600000	1702600000	1883800000	2242000000	2304700000	1831900000	2004200000	2164200000
SYNCRIP	O60506	O60506	sp|O60506|HNRPQ_HUMAN Heterogeneous nuclear ribonucleoprotein Q OS=Homo sapiens OX=9606 GN=SYNCRIP PE=1 SV=2	23	29	36662000000	2058600000	2045900000	2077100000	2257400000	1629400000	1868300000	2205800000	1374300000	1533600000	1825900000	1142700000	1867100000	1199400000	1296300000	1727100000	1687200000	1482000000	898820000	2011300000	1727700000	1222000000	1524100000	2419500000	2348200000	2498300000	2306300000	2149200000	2013500000	1968700000	1666200000	1765000000	1900300000	1791800000	1928000000	1794500000	1930800000	1822700000	2019600000	1940200000	1602400000	1963400000	1965500000	1860500000
EPRS	P07814	P07814	sp|P07814|SYEP_HUMAN Bifunctional glutamate/proline--tRNA ligase OS=Homo sapiens OX=9606 GN=EPRS1 PE=1 SV=5	66	66	36600000000	2698900000	2010500000	1973700000	2851400000	2250300000	1734000000	1855400000	1246600000	1640900000	1506300000	1059800000	1543400000	1190900000	1142600000	1920300000	1665300000	1486500000	750870000	1902300000	1663900000	1139200000	1367100000	2562400000	2369800000	2428800000	2636100000	2674000000	1983200000	1690500000	1677100000	1873500000	1767400000	2003200000	1667200000	1735600000	1834400000	1940500000	1820000000	1741700000	1781000000	1884500000	1794500000	1800900000
IGF2BP3	O00425	O00425	sp|O00425|IF2B3_HUMAN Insulin-like growth factor 2 mRNA-binding protein 3 OS=Homo sapiens OX=9606 GN=IGF2BP3 PE=1 SV=2	25	25	36550000000	1557100000	1220500000	1242600000	1448800000	1272900000	1940000000	2135600000	1742900000	1784200000	1759000000	1413700000	2038800000	1566900000	1328800000	1932400000	2032000000	1733900000	1301400000	2095100000	1984200000	1476800000	1542100000	1572100000	1476300000	1604000000	1587200000	1593700000	1983800000	1883200000	1929400000	1872200000	1949500000	2101500000	1868000000	1975800000	1935200000	1844400000	1942200000	1994300000	1966600000	1938800000	1939900000	2072800000
RPL5	P46777	P46777	sp|P46777|RL5_HUMAN 60S ribosomal protein L5 OS=Homo sapiens OX=9606 GN=RPL5 PE=1 SV=3	18	18	35756000000	3654300000	2287700000	2594400000	3190900000	2717700000	1294800000	1890100000	1043400000	1513300000	1337700000	922320000	1561200000	917500000	805620000	1624800000	1302800000	1098300000	710300000	1764000000	1538100000	936440000	1050500000	3626400000	2801000000	3221000000	3150100000	3137600000	1602000000	1776400000	1338700000	1690000000	1498200000	1526900000	1615500000	1301200000	1284700000	1805800000	1403100000	1360400000	1356600000	1762800000	1683900000	1307200000
VDAC1	P21796	P21796	sp|P21796|VDAC1_HUMAN Voltage-dependent anion-selective channel protein 1 OS=Homo sapiens OX=9606 GN=VDAC1 PE=1 SV=2	16	16	35270000000	1549000000	1637200000	1106900000	1613400000	1195000000	1645400000	2143000000	1481600000	1872600000	1828700000	874540000	2130500000	1434800000	1426900000	1987300000	1986900000	1721500000	901300000	2104400000	1652900000	1350700000	1625300000	1478200000	1828300000	1434400000	1541900000	1473100000	1951200000	1828100000	1830600000	1911400000	1939900000	1912800000	2027100000	2003400000	1910400000	1984700000	1885100000	1914100000	1785300000	1915600000	1900900000	1909800000
MCM3	P25205	P25205	sp|P25205|MCM3_HUMAN DNA replication licensing factor MCM3 OS=Homo sapiens OX=9606 GN=MCM3 PE=1 SV=3	48	48	35221000000	2169900000	1788500000	2002100000	2294900000	2127300000	1637200000	1956100000	1046800000	1351600000	1355700000	1287400000	1822100000	1182500000	1203400000	1993800000	1691000000	1342900000	849350000	1988900000	1617900000	1063700000	1448400000	2142400000	1977200000	2296300000	2165600000	2357500000	1919800000	1811800000	1622700000	1577600000	1766100000	1906900000	2098900000	1808400000	1704000000	2028600000	1921100000	1753800000	1665400000	1987700000	1829600000	1809500000
ACTBL2	Q562R1	Q562R1	sp|Q562R1|ACTBL_HUMAN Beta-actin-like protein 2 OS=Homo sapiens OX=9606 GN=ACTBL2 PE=1 SV=2	2	2	35042000000	0	0	0	0	0	0	0	12808000000	0	0	15104000	0	0	10315000000	16244000	11863000	11857000000	0	0	19268000	0	0	0	0	0	0	0	0	0	0	0	0	0	0	0	0	0	0	0	0	0	20985000	0
MCM4	P33991;Q9UJA3	P33991	sp|P33991|MCM4_HUMAN DNA replication licensing factor MCM4 OS=Homo sapiens OX=9606 GN=MCM4 PE=1 SV=5	45	45	34838000000	2055700000	1529200000	1672500000	1907200000	1682000000	1812300000	1873900000	1357700000	1527000000	1496300000	1018700000	1891300000	1323700000	1206900000	2102400000	1741000000	1353600000	735170000	2189300000	1761100000	1153100000	1448100000	1942500000	1777300000	1985900000	1880200000	1989900000	1949400000	1745800000	1705500000	1677900000	1804600000	1855400000	1902200000	1814400000	1896800000	2167400000	1873700000	1670600000	1708500000	2168000000	1945300000	1958100000
PA2G4	Q9UQ80	Q9UQ80	sp|Q9UQ80|PA2G4_HUMAN Proliferation-associated protein 2G4 OS=Homo sapiens OX=9606 GN=PA2G4 PE=1 SV=3	23	23	34756000000	2005500000	1429700000	1548800000	2038200000	1664400000	1763100000	1860300000	1311700000	1679200000	1568800000	1154000000	1649800000	1200700000	1249400000	1948600000	1655300000	1504600000	903920000	2185200000	1781400000	1265500000	1387700000	2091700000	1677000000	2112500000	2195900000	1988000000	1977400000	1820800000	1589900000	1689200000	1723900000	1937400000	1825900000	1832400000	1821300000	1900300000	1787300000	1694800000	1836600000	2036900000	1853000000	1964100000
YWHAH	Q04917	Q04917	sp|Q04917|1433F_HUMAN 14-3-3 protein eta OS=Homo sapiens OX=9606 GN=YWHAH PE=1 SV=4	17	17	34679000000	2291700000	1627200000	2067600000	2210300000	2351900000	1506900000	1670700000	1374500000	1828200000	1708900000	931310000	1381700000	1168200000	1187900000	1559300000	1509500000	1516300000	921230000	1619600000	1653000000	1238500000	1354200000	2309800000	1885300000	2495800000	2436900000	2946500000	1665000000	1592300000	1839400000	1972900000	1867800000	1542300000	1621900000	1716300000	1759300000	1668900000	1763300000	1817100000	1581200000	1743900000	1835000000	1805500000
CRMP1	Q14194	Q14194	sp|Q14194|DPYL1_HUMAN Dihydropyrimidinase-related protein 1 OS=Homo sapiens OX=9606 GN=CRMP1 PE=1 SV=1	25	25	34585000000	401630000	268300000	391750000	390340000	254710000	1926100000	2455400000	2284300000	2220500000	2209000000	1407400000	2273000000	1587400000	1535500000	1876600000	2161400000	2058700000	1223300000	2284000000	2147700000	1593200000	1634800000	571470000	455140000	624980000	550820000	543010000	2185700000	2437100000	2812500000	2512000000	2504500000	2165900000	2373900000	2315600000	2250000000	2124100000	2378900000	2521600000	2047000000	2383200000	2470800000	2273800000
RPS14	P62263	P62263	sp|P62263|RS14_HUMAN 40S ribosomal protein S14 OS=Homo sapiens OX=9606 GN=RPS14 PE=1 SV=3	11	11	34388000000	3062400000	2104900000	2594700000	2852900000	2692400000	1449000000	1636500000	1254300000	1000600000	1195700000	1032800000	1613400000	1035200000	1120500000	1538600000	1357400000	1035600000	776000000	1532200000	1239800000	1155600000	1107100000	3042000000	2679400000	3119000000	3074600000	3205300000	1623100000	1596200000	1504100000	1276100000	1351800000	1758000000	1675800000	1539600000	1590600000	1861500000	1476800000	1255700000	1529600000	1455800000	1445100000	1632900000
IMPDH2	P12268	P12268	sp|P12268|IMDH2_HUMAN Inosine-5-monophosphate dehydrogenase 2 OS=Homo sapiens OX=9606 GN=IMPDH2 PE=1 SV=2	24	25	34131000000	2433300000	1241700000	1753600000	2280800000	1813600000	1554500000	2060800000	1208600000	1628500000	1530600000	820170000	1444600000	1169700000	1195100000	1801400000	1752300000	1330700000	718560000	2234700000	1557600000	1199500000	1400600000	2276800000	1893800000	2087800000	2217100000	1988700000	1689700000	1756100000	1670900000	1662900000	1644100000	1592100000	1616700000	1563700000	1602300000	1793000000	1809900000	1638700000	1400700000	1931600000	1714600000	1768600000
LRPPRC	P42704	P42704	sp|P42704|LPPRC_HUMAN Leucine-rich PPR motif-containing protein, mitochondrial OS=Homo sapiens OX=9606 GN=LRPPRC PE=1 SV=3	67	68	34124000000	2841800000	3734000000	2451000000	2725700000	2145900000	1611500000	1224500000	887540000	996960000	1091000000	976230000	1356500000	946780000	1065800000	1906800000	1242200000	1158100000	658670000	1615700000	1324100000	962810000	1200200000	2720500000	3680400000	2591700000	2577000000	2390100000	1840400000	1376300000	1254400000	1207000000	1290500000	1763000000	1533800000	1606100000	1592700000	1880700000	1472700000	1472800000	1652400000	1634900000	1431000000	1675100000
HYOU1	Q9Y4L1	Q9Y4L1	sp|Q9Y4L1|HYOU1_HUMAN Hypoxia up-regulated protein 1 OS=Homo sapiens OX=9606 GN=HYOU1 PE=1 SV=1	40	41	34065000000	2180900000	2267000000	1657500000	2033300000	1741000000	1610800000	1729300000	1174300000	1537900000	1568200000	1163100000	1319600000	1236400000	1355800000	1623400000	1468000000	1385500000	1025400000	1877100000	1516900000	1183800000	1409400000	2173500000	2479200000	2080900000	2032600000	2006600000	1965400000	1678300000	1647100000	1711900000	1753500000	1892200000	1470700000	1854800000	2002600000	1733900000	1576100000	1819000000	1832800000	1948000000	1716000000	1748300000
HNRNPH3	P31942	P31942	sp|P31942|HNRH3_HUMAN Heterogeneous nuclear ribonucleoprotein H3 OS=Homo sapiens OX=9606 GN=HNRNPH3 PE=1 SV=2	11	11	34011000000	1101600000	1014900000	973900000	1113000000	867620000	1927900000	2214500000	1548300000	1823500000	1934500000	1201200000	1912000000	1431000000	1477900000	1962800000	1729000000	1763300000	1108300000	2229300000	1667800000	1451700000	1556900000	1158500000	1328000000	1210600000	1199000000	1118000000	2220100000	1927500000	2141500000	1963300000	2219900000	1938700000	1983600000	2038600000	2168200000	2026200000	1942500000	2025400000	2233600000	2139700000	1760800000	2198200000
PRKCSH	P14314	P14314	sp|P14314|GLU2B_HUMAN Glucosidase 2 subunit beta OS=Homo sapiens OX=9606 GN=PRKCSH PE=1 SV=2	24	24	33885000000	1311800000	1569900000	1171200000	1213600000	1080600000	1664600000	2090000000	1486500000	2099500000	1772700000	1077100000	1701100000	1308800000	1364700000	1767900000	1772800000	1593300000	921020000	2180000000	1970000000	1303600000	1464700000	1309700000	1827100000	1416100000	1225800000	1335300000	2034600000	1783400000	2203100000	2131500000	1971700000	1902100000	1762500000	1996100000	1972100000	1704200000	1971500000	2004800000	1958800000	2025400000	2062300000	1965100000
EZR	P15311	P15311	sp|P15311|EZRI_HUMAN Ezrin OS=Homo sapiens OX=9606 GN=EZR PE=1 SV=4	22	24	33779000000	3897000000	2615700000	3161700000	3929800000	2986800000	723770000	1285200000	1498200000	1758700000	1723900000	317060000	1176200000	1008000000	855660000	572820000	1114300000	1326000000	244570000	789890000	898970000	964240000	930530000	3622700000	3015000000	3595800000	3717000000	3308900000	910470000	1361200000	1779900000	1885900000	1743300000	822430000	1165100000	1443900000	1323900000	812150000	1291800000	1661400000	795560000	932070000	1158200000	1416500000
RPL23A	P62750	P62750	sp|P62750|RL23A_HUMAN 60S ribosomal protein L23a OS=Homo sapiens OX=9606 GN=RPL23A PE=1 SV=1	9	9	33729000000	3496900000	2523200000	2857900000	3313500000	2888800000	1424100000	1525900000	836420000	1033400000	1026000000	921610000	1323600000	923130000	1015000000	1578000000	1142600000	941120000	624340000	1337400000	975050000	1022800000	998280000	3481000000	3097400000	3538400000	3264800000	3497100000	1494900000	1454500000	1111200000	1082200000	1204200000	1707100000	1501800000	1309400000	1515100000	1728400000	1245300000	1188000000	1359100000	1389900000	1105200000	1478500000
INS;INS-IGF2	P01308;F8WCM5	P01308;F8WCM5	sp|P01308|INS_HUMAN Insulin OS=Homo sapiens OX=9606 GN=INS PE=1 SV=1;sp|F8WCM5|INSR2_HUMAN Insulin, isoform 2 OS=Homo sapiens OX=9606 GN=INS-IGF2 PE=2 SV=1	2	2	33631000000	95436000	53917000	34752000	18086000	14325000	3163900000	1825900000	949470000	991080000	1156100000	1791100000	1729600000	1775600000	2571800000	3698900000	1088300000	2162700000	1439100000	3640200000	1373500000	1928700000	2128900000	213860000	0	0	0	0	3391300000	1329000000	1578900000	1123600000	1164100000	3962300000	1954700000	2811500000	4356400000	3065700000	1284400000	2142300000	3975700000	2592400000	1521100000	2754300000
MYL6	P60660	P60660	sp|P60660|MYL6_HUMAN Myosin light polypeptide 6 OS=Homo sapiens OX=9606 GN=MYL6 PE=1 SV=2	7	9	33593000000	2201900000	1691300000	1663600000	2162300000	1647900000	1499100000	1755800000	1449900000	1466400000	1444700000	1001800000	1616700000	1179800000	1143000000	1558600000	1624300000	1416700000	922590000	1993900000	1642400000	1211000000	1299500000	2227500000	2178700000	2197600000	2306900000	1938800000	1787400000	1714700000	1818800000	1650800000	1685700000	1656800000	1711200000	1680100000	1664700000	1672200000	1800900000	1778500000	1615000000	2053700000	1853000000	1680600000
SPTBN1	Q01082	Q01082	sp|Q01082|SPTB2_HUMAN Spectrin beta chain, non-erythrocytic 1 OS=Homo sapiens OX=9606 GN=SPTBN1 PE=1 SV=2	80	84	33250000000	3131300000	2065200000	2449500000	3015600000	2390300000	1082200000	1574800000	1136900000	1541200000	1565300000	729800000	1267500000	919700000	858860000	1024000000	1423100000	1420900000	690980000	1519100000	1440100000	957640000	1045600000	2651300000	2356900000	2615700000	2582400000	2629500000	1446800000	1516500000	1703700000	1685200000	1657400000	1560800000	1475800000	1545400000	1441300000	1408100000	1502300000	1660600000	1677300000	1531800000	1584100000	1588100000
MARCKSL1	P49006	P49006	sp|P49006|MRP_HUMAN MARCKS-related protein OS=Homo sapiens OX=9606 GN=MARCKSL1 PE=1 SV=2	12	12	33041000000	648330000	456690000	643200000	549710000	678500000	1676200000	2126800000	1792400000	1978000000	1888900000	1563300000	1677400000	1631000000	1481500000	1504300000	1876600000	1740300000	2332500000	1841200000	1881900000	1516300000	1555700000	777520000	686080000	965360000	716180000	1042300000	1797700000	1895600000	2159700000	2186300000	2199100000	2590500000	1877200000	2644800000	2357400000	1708200000	2048600000	2250300000	2934900000	1840000000	1979900000	2566300000
RPS27A;UBB;UBC	P62979;P0CG47;P0CG48	P62979;P0CG47;P0CG48	sp|P62979|RS27A_HUMAN Ubiquitin-40S ribosomal protein S27a OS=Homo sapiens OX=9606 GN=RPS27A PE=1 SV=2;sp|P0CG47|UBB_HUMAN Polyubiquitin-B OS=Homo sapiens OX=9606 GN=UBB PE=1 SV=1;sp|P0CG48|UBC_HUMAN Polyubiquitin-C OS=Homo sapiens OX=9606 GN=UBC PE=1 SV=3	2	13	32656000000	2243700000	1802900000	1707200000	2091300000	2151400000	1498400000	1961200000	1059700000	1641800000	1334200000	943670000	1600500000	1039800000	1124300000	1596300000	1388900000	1292700000	672340000	1783500000	1506400000	974720000	1240700000	2287200000	2163700000	1944800000	2097300000	2149800000	1359400000	1571300000	1287000000	1463900000	1363500000	1399100000	1608100000	1321700000	1441000000	1437500000	1378600000	1503700000	1260700000	1680800000	1573600000	1213900000
HMGA1	P17096	P17096	sp|P17096|HMGA1_HUMAN High mobility group protein HMG-I/HMG-Y OS=Homo sapiens OX=9606 GN=HMGA1 PE=1 SV=3	5	5	32592000000	2284700000	1724300000	1800400000	1923700000	1664800000	1966700000	1821600000	1048100000	954480000	982340000	1072800000	1930500000	1145500000	943290000	2047100000	1541100000	1065000000	769610000	2014800000	1595500000	1133100000	1162200000	2598600000	2699900000	3604200000	2375000000	4037000000	1962500000	1463600000	882030000	969690000	929060000	1358700000	1465600000	1309000000	1209900000	2265000000	1278900000	987280000	1246100000	1703200000	1450100000	1338300000
MSN	P26038	P26038	sp|P26038|MOES_HUMAN Moesin OS=Homo sapiens OX=9606 GN=MSN PE=1 SV=3	28	38	32581000000	2453400000	1732800000	1743800000	2608200000	1796200000	1243400000	2469000000	1487000000	1519700000	1363300000	694340000	1764700000	811360000	659300000	1362600000	1725500000	1597100000	759470000	1569400000	1676800000	840550000	703230000	2375400000	2074500000	2242700000	2593400000	2304800000	1279000000	1947300000	1799300000	1869700000	1701400000	1305700000	1905800000	1252800000	1189700000	1340900000	1725000000	1580000000	1100800000	1421200000	1919000000	1321400000
TUBB8	Q3ZCM7	Q3ZCM7	sp|Q3ZCM7|TBB8_HUMAN Tubulin beta-8 chain OS=Homo sapiens OX=9606 GN=TUBB8 PE=1 SV=2	4	4	32483000000	1038900000	539460000	729700000	1069200000	761840000	1572800000	2449400000	1814900000	1916000000	1865100000	865570000	2603100000	1261400000	1220000000	1643300000	1986600000	1885800000	672250000	2028300000	1990300000	971740000	1596800000	1022800000	671920000	684940000	1072400000	867000000	1572300000	2177300000	2378800000	1848000000	2281400000	949950000	2821300000	1652200000	1087000000	1522300000	2009500000	2114800000	840140000	1879400000	2083800000	959600000
RPLP1	P05386	P05386	sp|P05386|RLA1_HUMAN 60S acidic ribosomal protein P1 OS=Homo sapiens OX=9606 GN=RPLP1 PE=1 SV=1	5	5	32470000000	2377700000	509600000	1904400000	2663500000	2239700000	1398600000	1615400000	1581000000	1476800000	1426900000	979420000	1586300000	1327100000	1062500000	1216300000	1609200000	1309900000	841000000	1681200000	1366000000	1177200000	1120700000	2387400000	1714700000	2470200000	2682000000	2909500000	1447700000	1428800000	1636300000	1518400000	1574800000	1691300000	1504500000	1759600000	1580000000	1313000000	1647500000	1563100000	1741200000	1527200000	1473800000	1727600000
HIST2H2BE;HIST1H2BB;HIST1H2BO;HIST1H2BJ;HIST3H2BB	Q16778;P33778;P23527;P06899;Q8N257;Q96A08;Q6DRA6;Q6DN03;A0A2R8Y619	Q16778;P33778;P23527;P06899;Q8N257	sp|Q16778|H2B2E_HUMAN Histone H2B type 2-E OS=Homo sapiens OX=9606 GN=H2BC21 PE=1 SV=3;sp|P33778|H2B1B_HUMAN Histone H2B type 1-B OS=Homo sapiens OX=9606 GN=H2BC3 PE=1 SV=2;sp|P23527|H2B1O_HUMAN Histone H2B type 1-O OS=Homo sapiens OX=9606 GN=H2BC17 PE=1 S	2	2	32461000000	711020000	1031900000	424010000	696540000	465960000	1458700000	2212600000	1352800000	1664700000	1860600000	1024800000	2717900000	1566300000	1316400000	1956000000	2084600000	1607000000	586600000	2447200000	2326400000	1463400000	1485300000	606490000	1348300000	437390000	624610000	518040000	1668400000	2017700000	1874600000	1711200000	2226500000	1576900000	3105800000	2319400000	1905900000	2108800000	2337300000	1957200000	1006900000	2427100000	2655800000	2054800000
RPL32	P62910	P62910	sp|P62910|RL32_HUMAN 60S ribosomal protein L32 OS=Homo sapiens OX=9606 GN=RPL32 PE=1 SV=2	11	11	32302000000	2609800000	1976600000	2976600000	2111500000	2786900000	1436500000	1203000000	1254400000	937780000	913260000	1072000000	1203700000	1223200000	1185800000	1198300000	923520000	1425500000	787140000	1436000000	1197300000	1178000000	1265200000	2762200000	2534000000	2891400000	2348800000	2791700000	1535000000	1444700000	1506200000	1319900000	1346700000	1639300000	1627100000	1618900000	1570300000	1537300000	1382100000	1534900000	1223900000	1844600000	1615800000	1490900000
SLC25A5	P05141;Q9H0C2	P05141	sp|P05141|ADT2_HUMAN ADP/ATP translocase 2 OS=Homo sapiens OX=9606 GN=SLC25A5 PE=1 SV=7	7	18	32267000000	2565800000	3067200000	2532800000	2189200000	1886400000	1345900000	1481000000	884570000	1125400000	1076000000	1137600000	1116900000	1122200000	1204400000	1445700000	1055900000	1126700000	822700000	1385300000	1339100000	1090800000	1265400000	2637000000	3653900000	3023700000	2405900000	2430000000	1471800000	1463500000	1233100000	1307600000	1418400000	1509000000	1264100000	1522500000	1437600000	1741300000	1279900000	1540300000	1238300000	1470400000	1528200000	1438200000
TBCA	O75347	O75347	sp|O75347|TBCA_HUMAN Tubulin-specific chaperone A OS=Homo sapiens OX=9606 GN=TBCA PE=1 SV=3	12	12	32099000000	2959000000	1655500000	2171700000	2523500000	1895900000	1012700000	1839600000	1458600000	1512900000	1514500000	556450000	1528200000	959400000	969780000	1175400000	1585500000	1195400000	579750000	1496700000	1514900000	964960000	1028300000	2772600000	2131500000	2667700000	2558600000	2457600000	1311400000	1608100000	1861100000	1511600000	1744200000	1072300000	1535400000	1409700000	1405000000	1213000000	1730400000	1506100000	1250400000	1334400000	1655700000	1557700000
GNB1	P62873	P62873	sp|P62873|GBB1_HUMAN Guanine nucleotide-binding protein G(I)/G(S)/G(T) subunit beta-1 OS=Homo sapiens OX=9606 GN=GNB1 PE=1 SV=3	11	17	31966000000	778170000	869970000	724090000	887680000	747200000	1859300000	1626300000	1605500000	1855100000	1847300000	1220800000	2083300000	883220000	1271000000	1802100000	2031200000	1849200000	1005300000	2125800000	1839700000	1495400000	1558000000	840810000	1013100000	862330000	958940000	941320000	2075100000	2377500000	1940800000	1813200000	2014500000	1772700000	2319500000	1809100000	1899500000	1818200000	2107100000	2107700000	1813500000	2114800000	1867900000	1931300000
RPL7	P18124	P18124	sp|P18124|RL7_HUMAN 60S ribosomal protein L7 OS=Homo sapiens OX=9606 GN=RPL7 PE=1 SV=1	19	19	31933000000	4407400000	3269900000	2919200000	4061300000	3797900000	893930000	1496800000	356360000	808540000	456770000	773480000	986840000	661170000	479260000	1756700000	490000000	538030000	488680000	1237900000	1059600000	495960000	497140000	4070700000	3568900000	3375900000	4065200000	4343800000	903730000	1168100000	592360000	1131700000	723000000	1377800000	1048700000	950210000	947580000	1660300000	721830000	925260000	1074200000	1516200000	971850000	774850000
CANX	P27824	P27824	sp|P27824|CALX_HUMAN Calnexin OS=Homo sapiens OX=9606 GN=CANX PE=1 SV=2	26	26	31784000000	1142300000	1110300000	1235900000	1229200000	1164600000	1954800000	2343000000	1182000000	2012900000	1704100000	876760000	1510900000	1100000000	923720000	2331800000	1708700000	1469400000	653490000	1759900000	2027500000	994300000	1349000000	1377400000	1330100000	1388700000	1340200000	1391100000	1850400000	1923000000	1555000000	2099800000	1790800000	1568400000	1528700000	1575800000	1719200000	2063400000	1702200000	1641400000	1472100000	1721100000	1886000000	1637000000
FKBP4	Q02790	Q02790	sp|Q02790|FKBP4_HUMAN Peptidyl-prolyl cis-trans isomerase FKBP4 OS=Homo sapiens OX=9606 GN=FKBP4 PE=1 SV=3	32	32	31729000000	3440800000	2547400000	2342100000	3393700000	3017500000	957520000	1414900000	941960000	1274100000	1091400000	693000000	1221800000	776440000	804690000	973610000	1173200000	1056300000	586510000	1176800000	1240100000	726190000	879300000	3213000000	2654900000	2830800000	3191800000	3291800000	1166300000	1341600000	1283000000	1305400000	1365900000	1201800000	1360700000	1275300000	1286200000	1093800000	1461300000	1294000000	1415400000	1247000000	1404700000	1226800000
CCT7	Q99832	Q99832	sp|Q99832|TCPH_HUMAN T-complex protein 1 subunit eta OS=Homo sapiens OX=9606 GN=CCT7 PE=1 SV=2	29	29	31650000000	2207200000	1306600000	1667100000	1950100000	1562600000	1298100000	1795800000	1302900000	1280000000	1283700000	1081000000	1564300000	1165800000	1041300000	1547900000	1377400000	1326300000	974820000	1861700000	1397500000	1270000000	1388100000	2039300000	1553800000	1943500000	1973200000	1936400000	1514200000	1607400000	1626300000	1486600000	1609100000	1751900000	1586900000	1665000000	1597800000	1690400000	1592700000	1685300000	1929100000	1739100000	1663100000	1630300000
SNRNP200	O75643	O75643	sp|O75643|U520_HUMAN U5 small nuclear ribonucleoprotein 200 kDa helicase OS=Homo sapiens OX=9606 GN=SNRNP200 PE=1 SV=2	78	78	31645000000	1394700000	1339200000	1290000000	1123400000	1371500000	1575300000	2125600000	1161000000	1884400000	1422300000	1102800000	1566200000	1216900000	1132000000	1815500000	1598900000	1383200000	751950000	2012800000	1751700000	1238700000	1386500000	1441600000	1711700000	1450800000	1363900000	1429200000	1845500000	1733500000	1642500000	1823900000	1686600000	1995600000	1786200000	1764900000	1777800000	1989300000	1798400000	1752900000	1612500000	1884600000	1916700000	1840000000
RPS11	P62280	P62280	sp|P62280|RS11_HUMAN 40S ribosomal protein S11 OS=Homo sapiens OX=9606 GN=RPS11 PE=1 SV=3	16	16	31579000000	2951400000	2288100000	2627300000	3018800000	2744000000	1401400000	1300400000	995770000	779360000	1013800000	853060000	1467200000	918390000	944030000	1403000000	1130200000	960920000	698730000	1333700000	1048700000	886860000	813800000	3008200000	2750900000	3115400000	3100600000	3391900000	1564000000	1355600000	1186600000	947530000	1118100000	1488600000	1485400000	1280000000	1275100000	1548200000	1298800000	1253300000	1189800000	1412800000	1272100000	1272100000
RANBP1	P43487	P43487	sp|P43487|RANG_HUMAN Ran-specific GTPase-activating protein OS=Homo sapiens OX=9606 GN=RANBP1 PE=1 SV=1	11	11	31461000000	875760000	868710000	1079600000	1389700000	1131800000	1546100000	1819300000	1566500000	1923200000	1765100000	967490000	1549000000	1433700000	1349800000	1648900000	1550600000	1702600000	791700000	1879500000	1621500000	1399000000	1601200000	1456600000	1210100000	1408300000	1621300000	1507400000	1797500000	1769200000	1567900000	2047100000	1927700000	1065800000	1678000000	1731500000	1657800000	1927800000	1846000000	2035500000	1234300000	2139000000	1940800000	1678600000
PHB2	Q99623	Q99623	sp|Q99623|PHB2_HUMAN Prohibitin-2 OS=Homo sapiens OX=9606 GN=PHB2 PE=1 SV=2	19	19	31359000000	1832700000	2106700000	1284100000	1740600000	1603500000	1702200000	1704500000	1224800000	1385200000	1240300000	948590000	1595700000	1019100000	1168200000	1662200000	1457400000	1150100000	1081000000	1687400000	1660600000	954390000	1150100000	1625100000	2462300000	1743200000	1709400000	1833600000	1867800000	1642500000	1628200000	1425200000	1642100000	1414800000	1553100000	1639500000	1715200000	1715900000	1708100000	1616300000	1862000000	1677200000	1803200000	1498000000
PRPF8	Q6P2Q9	Q6P2Q9	sp|Q6P2Q9|PRP8_HUMAN Pre-mRNA-processing-splicing factor 8 OS=Homo sapiens OX=9606 GN=PRPF8 PE=1 SV=2	81	81	31248000000	1461800000	1410800000	1194300000	1356300000	1142300000	1805700000	2084800000	1065200000	1623900000	1261200000	824100000	1665800000	883280000	1004300000	2269500000	1603300000	1574400000	689130000	2186000000	1827300000	972260000	1342800000	1456200000	1509200000	1575900000	1359500000	1382600000	1952800000	1891800000	1418100000	1649700000	1560600000	1785900000	1888500000	1634700000	1719900000	2174800000	1709500000	1715700000	1564200000	1882700000	1745000000	1701000000
RPL15	P61313	P61313	sp|P61313|RL15_HUMAN 60S ribosomal protein L15 OS=Homo sapiens OX=9606 GN=RPL15 PE=1 SV=2	11	11	31225000000	3230500000	2825000000	2166800000	2463200000	1762300000	968330000	1615900000	993330000	1860500000	1058400000	673240000	1134900000	777450000	686940000	1690100000	1486600000	1097000000	514300000	1593900000	1324500000	433600000	868440000	3074700000	2910200000	2962300000	2388500000	2484500000	1207300000	1624900000	1284000000	1635700000	1353600000	1330700000	1220500000	1226600000	1121800000	1839900000	1218800000	1204600000	1183000000	1591800000	1397300000	921730000
SUMO2	P61956;Q6EEV6	P61956	sp|P61956|SUMO2_HUMAN Small ubiquitin-related modifier 2 OS=Homo sapiens OX=9606 GN=SUMO2 PE=1 SV=3	2	3	31147000000	1246900000	979420000	837980000	1202900000	1081700000	1535300000	1924700000	1587700000	1742300000	1840800000	1067100000	1765300000	1309300000	1264900000	1282400000	1908800000	1476800000	988760000	1817900000	1830800000	1237400000	1217600000	1445100000	1209500000	1224500000	1474000000	1236900000	1956500000	1823500000	1623300000	1985500000	1987300000	1744800000	1676200000	1570400000	1989300000	1580200000	2171600000	1703500000	1793800000	1826200000	2007400000	1906800000
TMSB15B;TMSB15A	P0CG35;P0CG34	P0CG35;P0CG34	sp|P0CG35|TB15B_HUMAN Thymosin beta-15B OS=Homo sapiens OX=9606 GN=TMSB15B PE=1 SV=1;sp|P0CG34|TB15A_HUMAN Thymosin beta-15A OS=Homo sapiens OX=9606 GN=TMSB15A PE=1 SV=1	6	6	30756000000	187300000	61933000	110420000	143860000	97510000	1728600000	2682500000	1567800000	2216400000	2107100000	995150000	2212300000	1537700000	1171800000	1595000000	2244800000	1783200000	943990000	2090000000	2440300000	1379900000	1458300000	258060000	105530000	227450000	229860000	170700000	2162000000	2403200000	1810900000	2327500000	2482400000	1814100000	2292700000	2143700000	1798200000	1667700000	2564500000	2183800000	1741900000	2101600000	2495500000	2176600000
HNRNPR	O43390	O43390	sp|O43390|HNRPR_HUMAN Heterogeneous nuclear ribonucleoprotein R OS=Homo sapiens OX=9606 GN=HNRNPR PE=1 SV=1	22	22	30745000000	1015800000	936010000	725100000	921350000	758450000	1733100000	2245200000	1446500000	1379100000	1616400000	1015900000	1942700000	1309700000	1219600000	1982000000	1840000000	1454100000	809030000	2048800000	1772500000	1189900000	1383600000	1009600000	1245800000	989760000	965300000	979200000	2028700000	2144000000	1678900000	1516400000	1820500000	1666100000	1970800000	1878100000	1832200000	2089300000	1964700000	1745000000	1565100000	1930600000	1919800000	1786700000
RPL7A	P62424	P62424	sp|P62424|RL7A_HUMAN 60S ribosomal protein L7a OS=Homo sapiens OX=9606 GN=RPL7A PE=1 SV=2	19	19	30734000000	4522700000	3499700000	2925300000	4241500000	4263300000	867810000	896680000	558530000	518480000	586650000	592910000	779100000	566340000	606070000	1098900000	679580000	669480000	332770000	899020000	673900000	431820000	523130000	4233200000	3924800000	3426400000	4055200000	4723400000	1031500000	911230000	808580000	707430000	713890000	1150900000	939700000	845020000	841860000	1181600000	810310000	824690000	1053000000	901350000	821230000	798430000
ANP32A	P39687;O95626;O43423	P39687	sp|P39687|AN32A_HUMAN Acidic leucine-rich nuclear phosphoprotein 32 family member A OS=Homo sapiens OX=9606 GN=ANP32A PE=1 SV=1	14	16	30660000000	709060000	466550000	574350000	652670000	666210000	1438200000	2070800000	1696900000	2090500000	1858900000	1058200000	1958500000	1472600000	1393500000	1260300000	2010800000	1706600000	1004900000	1701900000	2147300000	1228200000	1493100000	859600000	667760000	853750000	838580000	1014100000	1878200000	2187600000	1650800000	2263800000	2100800000	1867800000	1883600000	1872900000	1837700000	1616400000	2226300000	1817800000	1833700000	1723600000	2237800000	1875700000
SPTAN1	Q13813	Q13813	sp|Q13813|SPTN1_HUMAN Spectrin alpha chain, non-erythrocytic 1 OS=Homo sapiens OX=9606 GN=SPTAN1 PE=1 SV=3	103	103	30554000000	2548000000	1699600000	2095600000	2716600000	2392800000	1270900000	1501300000	1072700000	1590300000	1255400000	603660000	1364800000	674820000	749080000	1272900000	1369300000	1201900000	455180000	1416500000	1596400000	738180000	967790000	2144100000	2002500000	2066800000	2239300000	2178600000	1483900000	1462600000	1463900000	1625500000	1498100000	1395100000	1419300000	1407300000	1421900000	1559300000	1465500000	1471400000	1442800000	1481400000	1554400000	1403300000
MDH1	P40925	P40925	sp|P40925|MDHC_HUMAN Malate dehydrogenase, cytoplasmic OS=Homo sapiens OX=9606 GN=MDH1 PE=1 SV=4	15	15	30296000000	1995300000	1225500000	1519500000	2002300000	1890200000	1054100000	1855900000	1536400000	1568000000	1601700000	784340000	1596200000	923580000	834050000	1290900000	1484300000	1472800000	635570000	1513300000	1519300000	903900000	1088800000	1895400000	1337400000	1717300000	1934000000	1836700000	1302000000	1600300000	2052800000	1671400000	1854400000	1476700000	1804700000	1487400000	1544500000	1391700000	1585500000	1800600000	1646800000	1378500000	1538800000	1644600000
KRT8	P05787;CON__P05787;CON__Q9H552;CON__Q9DCV7;Q9NSB2;CON__Q6ISB0;CON__Q9NSB2;CON__H-INV:HIT000016045;P12035;CON__P12035;CON__P07744;CON__Q01546;CON__REFSEQ:XP_092267;CON__Q8N1N4-2;CON__Q7RTT2;CON__P78386;CON__Q6NT21;CON__Q14533;CON__P78385;CON__O43790;CON__Q61726;P78386;P78385;Q8N1N4;O43790;Q14533	P05787;CON__P05787	sp|P05787|K2C8_HUMAN Keratin, type II cytoskeletal 8 OS=Homo sapiens OX=9606 GN=KRT8 PE=1 SV=7;	12	32	30260000000	4549200000	6373900000	4143600000	4275500000	3487200000	989320000	325620000	265200000	436550000	403920000	204440000	249110000	309960000	319230000	556460000	480900000	268990000	185290000	1079500000	515440000	490660000	350300000	4526700000	8203100000	4750600000	4575900000	4556400000	549510000	454680000	392260000	412780000	448410000	510150000	498630000	525860000	512600000	525260000	438700000	329420000	456630000	548750000	570720000	509330000
TF	P02787	P02787	sp|P02787|TRFE_HUMAN Serotransferrin OS=Homo sapiens OX=9606 GN=TF PE=1 SV=3	43	44	30255000000	395340000	805640000	460680000	497760000	360350000	2301900000	2544400000	656740000	734930000	865130000	2030100000	1349300000	972200000	924000000	4875500000	834030000	912130000	533280000	3795200000	1075400000	930740000	2400000000	675080000	1201900000	820400000	721870000	696670000	2386600000	2205400000	982410000	1048500000	1142500000	3196500000	1499700000	1348100000	1384600000	4562700000	1070600000	1135600000	1254800000	3449000000	1247600000	1416700000
CLIC1	O00299	O00299	sp|O00299|CLIC1_HUMAN Chloride intracellular channel protein 1 OS=Homo sapiens OX=9606 GN=CLIC1 PE=1 SV=4	18	18	30139000000	1281900000	759190000	992620000	1283800000	1179100000	1481300000	2200300000	1478700000	1751100000	1648200000	1052300000	1769400000	1039900000	991910000	1652000000	1683100000	1407400000	820700000	1713200000	1708000000	1016900000	1228100000	1328700000	1080600000	1344200000	1395500000	1480100000	1720500000	2001700000	1837100000	1846700000	1842000000	1652700000	1878100000	1488200000	1583900000	1737700000	1812900000	1672600000	1644600000	1701300000	1770900000	1533000000
MCM2	P49736	P49736	sp|P49736|MCM2_HUMAN DNA replication licensing factor MCM2 OS=Homo sapiens OX=9606 GN=MCM2 PE=1 SV=4	36	36	30122000000	1517000000	1261800000	1267900000	1572100000	1413800000	1553400000	1793400000	1051000000	1309400000	1175500000	1106100000	1545700000	1204100000	1157000000	1746100000	1484500000	1243500000	756140000	1857000000	1616000000	1114200000	1376200000	1606200000	1564300000	1704700000	1600500000	1683400000	1836800000	1560100000	1361800000	1439800000	1384800000	1750800000	1647400000	1601100000	1652200000	1878500000	1675400000	1491900000	1586500000	1797400000	1799400000	1601500000
RPS20	P60866	P60866	sp|P60866|RS20_HUMAN 40S ribosomal protein S20 OS=Homo sapiens OX=9606 GN=RPS20 PE=1 SV=1	7	7	30110000000	1902800000	1456100000	1913200000	2301900000	1845000000	1478100000	1516100000	1358000000	1107200000	1318500000	990590000	1362000000	1061700000	1044400000	1536200000	1155400000	1081800000	813110000	1435800000	1205300000	985300000	1241900000	2391900000	1832100000	2357900000	2423000000	2108000000	1817100000	1448500000	1474900000	1206500000	1554000000	1668400000	1392500000	1472100000	1572700000	1713600000	1313500000	1355500000	1509000000	1439000000	1349000000	1475600000
SF3B2	Q13435	Q13435	sp|Q13435|SF3B2_HUMAN Splicing factor 3B subunit 2 OS=Homo sapiens OX=9606 GN=SF3B2 PE=1 SV=2	34	34	30045000000	1521500000	1666100000	1284700000	1555800000	1216300000	1247300000	1739800000	1400700000	1695000000	1471500000	733970000	1574100000	1137000000	1029400000	1194300000	1578900000	1571900000	709300000	1597500000	1688000000	1047100000	1384500000	1482700000	1829500000	1529500000	1467000000	1437200000	1543800000	1693300000	1727800000	1727700000	1779100000	1411500000	1681400000	1697800000	1517600000	1331300000	1681300000	1781900000	1700100000	1540200000	1719000000	1679600000
37500	Q15019	Q15019	sp|Q15019|SEPT2_HUMAN Septin-2 OS=Homo sapiens OX=9606 GN=SEPTIN2 PE=1 SV=1	19	19	29718000000	1112600000	748250000	762810000	850340000	783430000	1583100000	2266900000	1629600000	2049400000	1372400000	915690000	1428300000	1387900000	1137300000	1239700000	1775100000	1784600000	833460000	1730500000	1461800000	1390200000	1474800000	1065700000	863670000	938140000	1097700000	968570000	1733600000	1878300000	1943400000	1959300000	1901000000	1422500000	2022200000	1759500000	1583000000	1430800000	1841200000	1913300000	1672100000	1720800000	1828600000	1766400000
SF3B3	Q15393	Q15393	sp|Q15393|SF3B3_HUMAN Splicing factor 3B subunit 3 OS=Homo sapiens OX=9606 GN=SF3B3 PE=1 SV=4	43	43	29653000000	1458100000	1517200000	1217300000	1378300000	1271200000	1314600000	1830800000	1103200000	1461800000	1385300000	966230000	1643600000	992340000	1064800000	1548100000	1605900000	1328900000	780140000	1771100000	1720200000	1057600000	1236700000	1319300000	1673500000	1519300000	1296900000	1381800000	1618900000	1684000000	1512400000	1646600000	1656300000	1687000000	1752400000	1562800000	1623200000	1634500000	1721900000	1608000000	1790600000	1724100000	1824900000	1650900000
HNRNPF	P52597	P52597	sp|P52597|HNRPF_HUMAN Heterogeneous nuclear ribonucleoprotein F OS=Homo sapiens OX=9606 GN=HNRNPF PE=1 SV=3	14	14	29476000000	1920800000	1659800000	1540400000	2044800000	1531400000	1318800000	1683400000	1019900000	1323300000	1281100000	764820000	1599400000	1000200000	959860000	1375400000	1650800000	1096700000	509350000	1800800000	1322600000	1000600000	1071600000	1900500000	1948000000	1719900000	1947700000	1806300000	1482300000	1591000000	1320000000	1443800000	1456200000	1214000000	1792200000	1559800000	1323000000	1388100000	1710800000	1403300000	1194100000	1811600000	1441700000	1412200000
EIF3A	Q14152	Q14152	sp|Q14152|EIF3A_HUMAN Eukaryotic translation initiation factor 3 subunit A OS=Homo sapiens OX=9606 GN=EIF3A PE=1 SV=1	66	66	29465000000	2445900000	1642400000	2044000000	2150800000	1977600000	1291100000	1594900000	977680000	1308500000	1321600000	671620000	1295600000	913260000	833550000	1295900000	1165200000	1160100000	547070000	1639800000	1362500000	775910000	1050500000	2114700000	1947000000	2223100000	2079200000	2109100000	1424700000	1468900000	1281500000	1421000000	1478700000	1461000000	1418800000	1380600000	1320000000	1601700000	1373000000	1359100000	1336700000	1554100000	1559900000	1285100000
RBM14	Q96PK6	Q96PK6	sp|Q96PK6|RBM14_HUMAN RNA-binding protein 14 OS=Homo sapiens OX=9606 GN=RBM14 PE=1 SV=2	24	24	29374000000	1172600000	1735100000	1096600000	1171100000	969370000	1579900000	1669600000	1339700000	1551200000	1427600000	893460000	1585000000	1207000000	1111000000	1565400000	1578700000	1374600000	658670000	1746600000	1614400000	1073000000	1253600000	1225200000	1871700000	1351700000	1198200000	1112500000	1797500000	1571600000	1794200000	1565300000	1600500000	1613400000	1687100000	1775200000	1712600000	1639800000	1617200000	1651300000	1721900000	1828300000	1620600000	1677300000
RUVBL2	Q9Y230	Q9Y230	sp|Q9Y230|RUVB2_HUMAN RuvB-like 2 OS=Homo sapiens OX=9606 GN=RUVBL2 PE=1 SV=3	31	31	29374000000	1479800000	1164000000	1129300000	1551400000	1150200000	1535300000	1661800000	1165900000	1320400000	1418300000	1093600000	1429800000	1252000000	1150700000	1531600000	1402000000	1303100000	1012400000	1722200000	1490000000	1117600000	1292800000	1429400000	1544200000	1423000000	1498300000	1531800000	1796400000	1523800000	1612800000	1578000000	1515900000	1737700000	1523100000	1740100000	1716900000	1570000000	1629800000	1588300000	1920000000	1803200000	1625500000	1769400000
WDR1	O75083	O75083	sp|O75083|WDR1_HUMAN WD repeat-containing protein 1 OS=Homo sapiens OX=9606 GN=WDR1 PE=1 SV=4	24	24	29043000000	1938000000	1197900000	1636600000	1778000000	1669300000	1526400000	1530700000	992810000	1239300000	1433800000	996900000	1343400000	1013300000	1146400000	1216200000	1255800000	1179200000	747080000	1428900000	1249000000	1192200000	1331800000	1878100000	1432500000	1796700000	1755100000	1773400000	1670000000	1479600000	1537800000	1453200000	1602700000	1550700000	1505600000	1573300000	1683300000	1475700000	1484300000	1440700000	1728400000	1592600000	1410500000	1639000000
GNAI2	P04899;P11488;P19087;A8MTJ3	P04899	sp|P04899|GNAI2_HUMAN Guanine nucleotide-binding protein G(i) subunit alpha-2 OS=Homo sapiens OX=9606 GN=GNAI2 PE=1 SV=3	15	21	28747000000	486170000	447280000	462800000	533190000	583470000	1547900000	2295900000	1348000000	1624600000	1704200000	1099500000	2018200000	1225300000	1148800000	1470900000	1990600000	1454500000	769330000	1922300000	2044200000	1174900000	1395100000	689430000	680380000	678380000	639110000	713610000	1758400000	2020000000	1615700000	1852700000	1763100000	1767200000	1915100000	1686200000	1606100000	1813100000	2032100000	1602500000	1595800000	1815900000	2003100000	1698100000
MCM5	P33992	P33992	sp|P33992|MCM5_HUMAN DNA replication licensing factor MCM5 OS=Homo sapiens OX=9606 GN=MCM5 PE=1 SV=5	44	44	28671000000	1779600000	1047400000	1374700000	1526700000	1322300000	1486800000	2184900000	928510000	1083700000	1062300000	832240000	1462800000	990160000	966470000	2399000000	1250100000	1093100000	585100000	2095500000	1329000000	863040000	1007300000	1458400000	1391300000	1734800000	1584500000	1769200000	1729800000	1583100000	1308200000	1252600000	1433500000	1386700000	1670400000	1446700000	1481900000	2009700000	1536000000	1332500000	1305700000	1647100000	1473200000	1415400000
ADH5	P11766	P11766	sp|P11766|ADHX_HUMAN Alcohol dehydrogenase class-3 OS=Homo sapiens OX=9606 GN=ADH5 PE=1 SV=4	19	19	28561000000	1214800000	655770000	937760000	1213400000	1060300000	1390900000	1927100000	1401500000	1611500000	1676500000	1043600000	1600100000	998140000	969030000	1580200000	1677000000	1450900000	764160000	1701000000	1693800000	955000000	1038400000	1397100000	925710000	1178100000	1287500000	1378000000	1583600000	1879900000	1466700000	1945200000	1785000000	1640200000	1531600000	1363600000	1539100000	1727200000	1695400000	1653200000	1569400000	1678400000	1873200000	1464000000
SRSF3	P84103	P84103	sp|P84103|SRSF3_HUMAN Serine/arginine-rich splicing factor 3 OS=Homo sapiens OX=9606 GN=SRSF3 PE=1 SV=1	12	13	28511000000	1081500000	812940000	923220000	985540000	863860000	1482100000	1745300000	1650200000	1440100000	1483000000	962710000	1777600000	1262500000	1293500000	1388000000	1342600000	1430800000	791730000	1686100000	1587600000	1188000000	1332100000	1080600000	1138500000	1130100000	1086400000	1178800000	1764000000	1538100000	1747400000	1478300000	1637300000	1817700000	1644900000	1812300000	1721400000	1332700000	1432500000	1722100000	1629300000	1561300000	1564700000	1701900000
ACAT2	Q9BWD1	Q9BWD1	sp|Q9BWD1|THIC_HUMAN Acetyl-CoA acetyltransferase, cytosolic OS=Homo sapiens OX=9606 GN=ACAT2 PE=1 SV=2	20	20	28198000000	1226900000	796330000	881220000	1348900000	1065100000	1386000000	2069600000	1596800000	1442800000	1595400000	853260000	1585200000	1074100000	1010000000	922370000	1527100000	1613900000	748830000	1660100000	1545400000	1055500000	1193400000	1268000000	1004100000	1131700000	1319500000	1292600000	1531100000	1786700000	1857600000	1687200000	1763300000	1534900000	1547800000	1425900000	1309800000	1491200000	1792000000	1841200000	1630700000	1724200000	1635200000	1444500000
AGRN	O00468	O00468	sp|O00468|AGRIN_HUMAN Agrin OS=Homo sapiens OX=9606 GN=AGRN PE=1 SV=6	55	55	27908000000	23423000	9444800	0	12022000	18905000	1861700000	1912500000	1025800000	1522100000	1370800000	1650500000	1754200000	1497800000	1571700000	2254700000	1483900000	1376000000	987440000	2557100000	1833600000	1121100000	2063000000	0	0	0	42957000	0	2089600000	1683900000	1386100000	1531800000	1659700000	2474600000	1813200000	2107000000	2103500000	2159400000	2112500000	1779800000	2196700000	2260600000	2333200000	1914000000
HMGCS1	Q01581;P54868	Q01581	sp|Q01581|HMCS1_HUMAN Hydroxymethylglutaryl-CoA synthase, cytoplasmic OS=Homo sapiens OX=9606 GN=HMGCS1 PE=1 SV=2	24	24	27729000000	1616100000	1126900000	1865900000	1501600000	1553500000	1546600000	1571000000	1003600000	1290600000	1058700000	912290000	1088500000	978260000	952500000	1449500000	1312600000	1105900000	642550000	1703400000	1195000000	1121600000	1131800000	1562800000	1299800000	2103700000	1486400000	1705000000	1644700000	1494100000	1285300000	1350800000	1251400000	1533900000	1275500000	1419200000	1409500000	1545900000	1351600000	1472200000	1396500000	1740300000	1469700000	1483500000
SNRPD2	P62316	P62316	sp|P62316|SMD2_HUMAN Small nuclear ribonucleoprotein Sm D2 OS=Homo sapiens OX=9606 GN=SNRPD2 PE=1 SV=1	11	11	27727000000	1577800000	1269900000	1296200000	1439300000	1319500000	1359400000	1770600000	1080600000	1521200000	1395000000	849980000	1436700000	875160000	1000300000	1467100000	1609200000	1107000000	589810000	1569300000	1343700000	876880000	972130000	1502400000	1493300000	1694000000	1336500000	1499700000	1447500000	1545400000	1264200000	1504200000	1444500000	1501000000	1342100000	1265600000	1572300000	1491000000	1618400000	1230400000	1228100000	1417500000	1338200000	1292600000
GTF2I	P78347	P78347	sp|P78347|GTF2I_HUMAN General transcription factor II-I OS=Homo sapiens OX=9606 GN=GTF2I PE=1 SV=2	51	54	27719000000	1104300000	917050000	965670000	1068600000	785850000	1502100000	1926800000	1097500000	1661400000	1502100000	920300000	1417900000	901330000	925820000	1735000000	1692400000	1413300000	553690000	1660700000	1639100000	1106200000	1221400000	1166400000	1314900000	1281500000	1228600000	1157000000	1676500000	1551800000	1429400000	1495100000	1645000000	1654000000	1636300000	1556900000	1615700000	1627800000	1603100000	1533800000	1482300000	1531000000	1560400000	1544100000
ILF2	Q12905	Q12905	sp|Q12905|ILF2_HUMAN Interleukin enhancer-binding factor 2 OS=Homo sapiens OX=9606 GN=ILF2 PE=1 SV=2	20	20	27665000000	1463600000	1476400000	1076400000	1333800000	1166400000	1166800000	1838500000	1292100000	1414800000	1435200000	687670000	1539600000	1040800000	874500000	1481200000	1448400000	1423500000	556640000	1415800000	1706800000	842520000	983100000	1407300000	1603300000	1337800000	1292600000	1272000000	1334100000	1612700000	1652900000	1476300000	1581800000	1233200000	1685500000	1569600000	1427300000	1601700000	1547100000	1605900000	1363400000	1481900000	1671000000	1407700000
39326	Q16181	Q16181	sp|Q16181|SEPT7_HUMAN Septin-7 OS=Homo sapiens OX=9606 GN=SEPTIN7 PE=1 SV=2	19	20	27630000000	986030000	756970000	810070000	884020000	771160000	1248600000	1770700000	1410200000	1749100000	1575000000	1138900000	1492500000	1178900000	1170300000	1180300000	1451100000	1615700000	1050700000	1468500000	1448200000	1174000000	1299300000	1094300000	912760000	1055600000	1095800000	1081400000	1578400000	1699700000	1665100000	1906400000	1714900000	1482700000	1623800000	1425500000	1540400000	1393100000	1694300000	1644200000	1580300000	1595400000	1772100000	1434300000
GART	P22102	P22102	sp|P22102|PUR2_HUMAN Trifunctional purine biosynthetic protein adenosine-3 OS=Homo sapiens OX=9606 GN=GART PE=1 SV=1	41	41	27602000000	2545700000	1336100000	1554000000	2232300000	1726900000	1353300000	1209900000	907160000	978640000	1109700000	797770000	1221500000	849250000	958480000	1074500000	1064300000	1123000000	849040000	1332500000	1205300000	1026700000	1145500000	2291100000	1714800000	1970100000	2140800000	2190000000	1539300000	1231500000	1114100000	1133500000	1288700000	1512200000	1310900000	1293000000	1367200000	1453800000	1255400000	1279000000	1531500000	1391800000	1253600000	1423000000
DARS	P14868	P14868	sp|P14868|SYDC_HUMAN Aspartate--tRNA ligase, cytoplasmic OS=Homo sapiens OX=9606 GN=DARS1 PE=1 SV=2	31	31	27505000000	1717900000	1096200000	1203300000	1623200000	1303600000	1423300000	1837200000	969360000	1575800000	1426500000	825230000	1408300000	816350000	858960000	1449000000	1365300000	1111500000	645320000	1347900000	1621700000	885770000	993370000	1607300000	1520400000	1434800000	1589000000	1531300000	1552100000	1549400000	1326400000	1678400000	1546500000	1495300000	1555600000	1311600000	1323200000	1481600000	1563100000	1388600000	1390900000	1437100000	1608000000	1391900000
CBX5	P45973	P45973	sp|P45973|CBX5_HUMAN Chromobox protein homolog 5 OS=Homo sapiens OX=9606 GN=CBX5 PE=1 SV=1	19	20	27438000000	591600000	616150000	576330000	601380000	599800000	1397400000	1633700000	1268200000	1449400000	1332700000	1051400000	1425900000	1389600000	1356800000	1821100000	1068100000	1537300000	907990000	2161400000	1723700000	1322800000	1604900000	713740000	860900000	814900000	848120000	871280000	1873500000	1725600000	1431000000	1831100000	1570100000	1511400000	1557900000	1562500000	1769700000	2211900000	1540300000	1650500000	1263400000	2281700000	1949500000	1588300000
SHMT2	P34897	P34897	sp|P34897|GLYM_HUMAN Serine hydroxymethyltransferase, mitochondrial OS=Homo sapiens OX=9606 GN=SHMT2 PE=1 SV=3	26	27	27311000000	1858600000	2193800000	1271000000	1922800000	1550600000	1500600000	1258200000	969810000	921110000	997530000	1041700000	1069700000	1017700000	908800000	1472400000	1052800000	1002800000	832480000	1392400000	1079200000	982790000	1014100000	1938000000	2538900000	1564800000	1860900000	1855300000	1662400000	1179600000	1209600000	1032900000	1155000000	1853100000	1137800000	1404900000	1424000000	1649300000	1239000000	1224100000	1677200000	1528900000	1176900000	1446100000
RPL11	P62913	P62913	sp|P62913|RL11_HUMAN 60S ribosomal protein L11 OS=Homo sapiens OX=9606 GN=RPL11 PE=1 SV=2	9	9	27259000000	1703700000	1406500000	1700900000	1966700000	1558400000	1483100000	1444700000	1009600000	1011200000	1029500000	992260000	1203000000	885200000	1068100000	1404900000	1114900000	1143800000	923140000	1416100000	866980000	940130000	986100000	2098800000	1771700000	2051600000	1938300000	1979500000	1520300000	1172800000	1140200000	1104600000	1130300000	1603700000	1364400000	1437300000	1491500000	1493700000	1281500000	1328100000	1708700000	1313300000	1178100000	1358400000
PPIB	P23284	P23284	sp|P23284|PPIB_HUMAN Peptidyl-prolyl cis-trans isomerase B OS=Homo sapiens OX=9606 GN=PPIB PE=1 SV=2	16	16	27194000000	2809300000	2970800000	2065600000	2538300000	2154500000	738620000	1304100000	989810000	1168000000	1018200000	614140000	834780000	776910000	747140000	813790000	910750000	993970000	174550000	1024400000	973590000	719810000	853350000	2635800000	3500100000	2261500000	2446700000	2285300000	1109300000	1289000000	1174200000	1216200000	1181500000	904280000	974130000	1107600000	1010800000	1011600000	1008800000	1251300000	874890000	1114100000	1041300000	1042400000
ISYNA1	Q9NPH2	Q9NPH2	sp|Q9NPH2|INO1_HUMAN Inositol-3-phosphate synthase 1 OS=Homo sapiens OX=9606 GN=ISYNA1 PE=1 SV=1	24	24	27164000000	623210000	256250000	460270000	543400000	417990000	1429100000	1816300000	1578900000	1735300000	1827100000	1023700000	1631800000	1254800000	1355200000	1184800000	1580200000	1699700000	993580000	1416600000	1647200000	1254500000	1434200000	754790000	512020000	664520000	762120000	651630000	1575800000	1808200000	2045300000	1983600000	2192000000	1479700000	1823000000	1712100000	1576000000	1386200000	1885200000	1877800000	1650600000	1534200000	1892500000	1742800000
AKR1B1	P15121;C9JRZ8	P15121	sp|P15121|ALDR_HUMAN Aldo-keto reductase family 1 member B1 OS=Homo sapiens OX=9606 GN=AKR1B1 PE=1 SV=3	16	16	27031000000	716780000	465710000	517390000	861780000	676460000	1455800000	1942400000	1470900000	1628700000	1615600000	982590000	1561900000	989790000	1077100000	1529200000	1798600000	1260600000	703060000	1922200000	1587300000	1026100000	1240500000	791370000	727310000	691770000	915230000	960130000	1741100000	1820300000	1878900000	1767700000	1867600000	1731800000	1616700000	1347300000	1650000000	1575600000	1978800000	1486200000	1464100000	1731400000	1726300000	1571900000
PSIP1	O75475	O75475	sp|O75475|PSIP1_HUMAN PC4 and SFRS1-interacting protein OS=Homo sapiens OX=9606 GN=PSIP1 PE=1 SV=1	23	25	26906000000	1668700000	1743700000	1411400000	1587900000	1345400000	1479900000	1465800000	1031400000	1111100000	1170300000	791340000	1475500000	925690000	790620000	1428900000	1657100000	909500000	552670000	1298200000	1291300000	866970000	901970000	1644300000	2072200000	1767900000	1609100000	1607500000	1580800000	1355900000	1305300000	1257100000	1301700000	1253700000	1424300000	1313100000	1358500000	1475700000	1520900000	1226100000	1173200000	1235500000	1310700000	1299500000
TPR	P12270	P12270	sp|P12270|TPR_HUMAN Nucleoprotein TPR OS=Homo sapiens OX=9606 GN=TPR PE=1 SV=3	78	78	26868000000	1334700000	1758600000	980420000	1300300000	936000000	1002600000	1655400000	1125600000	1343100000	1331200000	700120000	1465800000	969980000	953340000	1085700000	1579700000	1287600000	778120000	1542300000	1559700000	1064200000	1113700000	1496400000	1958700000	1427600000	1331800000	1236500000	1466200000	1493200000	1383100000	1399700000	1488800000	1427000000	1555400000	1403900000	1447100000	1283300000	1504200000	1531900000	1503800000	1562900000	1566600000	1430500000
RPN1	P04843	P04843	sp|P04843|RPN1_HUMAN Dolichyl-diphosphooligosaccharide--protein glycosyltransferase subunit 1 OS=Homo sapiens OX=9606 GN=RPN1 PE=1 SV=1	27	27	26767000000	1515600000	1298800000	1294200000	1520600000	1308600000	1596400000	1565100000	922050000	1253200000	1000900000	859680000	1312800000	1028400000	1001700000	1395700000	1346800000	1076200000	652340000	1438800000	1353000000	954980000	1071600000	1420200000	1485300000	1408100000	1420200000	1238600000	1684600000	1394100000	1422600000	1282700000	1362700000	1346700000	1438200000	1431300000	1444500000	1672500000	1465700000	1250200000	1351900000	1432900000	1447200000	1433000000
RPL12	P30050	P30050	sp|P30050|RL12_HUMAN 60S ribosomal protein L12 OS=Homo sapiens OX=9606 GN=RPL12 PE=1 SV=1	10	10	26710000000	2367000000	1613400000	1905900000	2071700000	1831300000	1009700000	1415600000	827690000	1130200000	1042400000	715580000	1100600000	733470000	737800000	1215400000	1330500000	927470000	523650000	1315800000	1277800000	728900000	888410000	2435100000	1987800000	2279200000	2206600000	2109200000	1150500000	1273700000	1119800000	1267400000	1185000000	1160600000	1206200000	1066100000	1083800000	1322300000	1192700000	1145600000	1165100000	1257700000	1319800000	987490000
APEX1	P27695	P27695	sp|P27695|APEX1_HUMAN DNA-(apurinic or apyrimidinic site) endonuclease OS=Homo sapiens OX=9606 GN=APEX1 PE=1 SV=2	17	17	26449000000	1291800000	1001200000	1277600000	1367600000	1298000000	1291600000	1524100000	1192300000	1323000000	1163900000	947980000	1242300000	1044500000	1013500000	1338300000	1259100000	1320200000	838100000	1326500000	1284100000	1037800000	1065300000	1352100000	1306600000	1480400000	1386200000	1484900000	1518000000	1514800000	1505900000	1471100000	1407800000	1436100000	1467200000	1409000000	1407000000	1497100000	1451600000	1536700000	1326800000	1437400000	1405600000	1512300000
PTMA	P06454	P06454	sp|P06454|PTMA_HUMAN Prothymosin alpha OS=Homo sapiens OX=9606 GN=PTMA PE=1 SV=2	5	5	26346000000	2490300000	1136200000	1926500000	2252000000	2228700000	1036100000	1538700000	872920000	1405700000	1048000000	569110000	1006900000	791160000	609640000	1242400000	1031400000	854100000	450230000	1130400000	1308500000	702770000	714060000	2253700000	1360300000	2254100000	2257700000	2340200000	1247800000	1397500000	870090000	1577000000	1156700000	963850000	993380000	971490000	845380000	1322200000	1041400000	989980000	1352700000	1104700000	1377600000	1049300000
UGDH	O60701	O60701	sp|O60701|UGDH_HUMAN UDP-glucose 6-dehydrogenase OS=Homo sapiens OX=9606 GN=UGDH PE=1 SV=1	28	28	26283000000	751720000	535610000	578910000	716100000	549700000	1502100000	1891800000	1049800000	1356000000	1334900000	1011800000	1674100000	1076200000	1016300000	1858700000	1773300000	1141700000	768160000	1859500000	1612200000	968300000	1256200000	821330000	645700000	745260000	758070000	801680000	1655900000	1764300000	1411600000	1467300000	1513700000	1636200000	1749700000	1583800000	1554100000	1869400000	1917500000	1453400000	1449400000	1761800000	1652600000	1521000000
RPS17	P08708	P08708	sp|P08708|RS17_HUMAN 40S ribosomal protein S17 OS=Homo sapiens OX=9606 GN=RPS17 PE=1 SV=2	8	8	25910000000	2133800000	1136000000	1649000000	2195400000	1653700000	960020000	1309100000	1092900000	950900000	1041700000	616470000	1248300000	922370000	919590000	1120900000	1162300000	1003500000	655890000	1186300000	1127400000	855360000	969380000	2058000000	1613700000	2068200000	2159900000	2115300000	1337200000	1150900000	1387600000	1071100000	1239600000	1062000000	1341800000	1347200000	1362800000	1134400000	1218000000	1231200000	1348600000	1046100000	1145500000	1277500000
CLIC4	Q9Y696	Q9Y696	sp|Q9Y696|CLIC4_HUMAN Chloride intracellular channel protein 4 OS=Homo sapiens OX=9606 GN=CLIC4 PE=1 SV=4	17	17	25904000000	1417200000	914150000	1372900000	2045100000	1751500000	1167700000	1215400000	1199200000	1295800000	1207700000	875280000	1182400000	890920000	875900000	1303400000	1150300000	1049800000	665150000	1208200000	1176300000	923520000	1016400000	2235100000	1363600000	1668400000	2108300000	1992000000	1347700000	1162000000	1269000000	1391500000	1267900000	1429900000	999900000	1269000000	1291300000	1345200000	1122700000	1470500000	1471800000	1254400000	1194400000	1293700000
HIST1H1B	P16401	P16401	sp|P16401|H15_HUMAN Histone H1.5 OS=Homo sapiens OX=9606 GN=H1-5 PE=1 SV=3	11	11	25863000000	2185100000	2961100000	449750000	2524800000	3396000000	548740000	1268600000	412860000	341910000	756580000	1977100000	2763900000	354790000	376400000	1082300000	1055600000	316800000	363790000	937600000	809130000	676890000	303400000	2142100000	3155700000	644380000	2392400000	3791200000	792440000	1214100000	568050000	593430000	850780000	3122200000	2705700000	648940000	730540000	1203600000	1107400000	496060000	922890000	924740000	878190000	999920000
SERBP1	Q8NC51	Q8NC51	sp|Q8NC51|PAIRB_HUMAN Plasminogen activator inhibitor 1 RNA-binding protein OS=Homo sapiens OX=9606 GN=SERBP1 PE=1 SV=2	18	18	25773000000	2786800000	1786200000	2470000000	2721400000	2616300000	1065500000	1396700000	485420000	1280100000	764590000	532920000	607810000	413830000	490960000	1309800000	925650000	581330000	331190000	1082400000	993550000	488930000	641600000	2529600000	2068300000	3033300000	2589900000	3008600000	1191700000	1285400000	665820000	1369100000	864870000	780880000	657280000	597900000	864830000	1518800000	1065300000	777630000	652800000	1062700000	1077500000	832540000
EIF4A3	P38919	P38919	sp|P38919|IF4A3_HUMAN Eukaryotic initiation factor 4A-III OS=Homo sapiens OX=9606 GN=EIF4A3 PE=1 SV=4	21	21	25734000000	960900000	1104400000	837310000	1073100000	978510000	1509400000	1689600000	1013500000	1412400000	1187600000	885800000	1207800000	1007000000	1043600000	1424000000	1358200000	1286000000	732980000	1356600000	1411500000	1051300000	1202300000	1168900000	1453800000	1183900000	1237300000	1428600000	1593900000	1476000000	1368900000	1491800000	1403000000	1455600000	1460400000	1370300000	1551900000	1466800000	1435100000	1413800000	1425400000	1418600000	1400500000	1639600000
DDX1	Q92499	Q92499	sp|Q92499|DDX1_HUMAN ATP-dependent RNA helicase DDX1 OS=Homo sapiens OX=9606 GN=DDX1 PE=1 SV=2	35	35	25605000000	951480000	741840000	779340000	1036100000	866920000	1337700000	1714700000	1164100000	1397600000	1394400000	742310000	1480900000	1087100000	994540000	1334500000	1310300000	1235000000	628910000	1741100000	1490400000	1040700000	1134700000	1000400000	951450000	1011000000	988810000	1035100000	1426700000	1538200000	1530500000	1417900000	1612500000	1493300000	1539300000	1635800000	1493500000	1299700000	1482000000	1494200000	1504700000	1566300000	1469000000	1580000000
CHD4	Q14839	Q14839	sp|Q14839|CHD4_HUMAN Chromodomain-helicase-DNA-binding protein 4 OS=Homo sapiens OX=9606 GN=CHD4 PE=1 SV=2	42	61	25578000000	905290000	752090000	686320000	886740000	763980000	1358900000	1947500000	1006100000	1419800000	1282500000	1043500000	1704500000	883230000	989070000	1778300000	1594400000	1038700000	729700000	1699400000	1268900000	892580000	946800000	947510000	1052000000	960700000	1018600000	1055600000	1676900000	1678500000	1283100000	1452900000	1447400000	1646200000	1630300000	1354400000	1499200000	1689700000	1626000000	1313300000	1440500000	1584600000	1313400000	1522200000
TUBA1A;TUBA3E	Q71U36;P0DPH8;P0DPH7;Q6PEY2	Q71U36;P0DPH8;P0DPH7;Q6PEY2	sp|Q71U36|TBA1A_HUMAN Tubulin alpha-1A chain OS=Homo sapiens OX=9606 GN=TUBA1A PE=1 SV=1;sp|P0DPH8|TBA3D_HUMAN Tubulin alpha-3D chain OS=Homo sapiens OX=9606 GN=TUBA3D PE=1 SV=1;sp|P0DPH7|TBA3C_HUMAN Tubulin alpha-3C chain OS=Homo sapiens OX=9606 GN=TUBA3C	1	3	25574000000	383430000	283210000	317670000	368920000	340400000	1123500000	1938300000	1678000000	1942900000	1684500000	666200000	1878400000	1214600000	1046200000	1175600000	1861800000	1672800000	643730000	1502400000	1606200000	855920000	1388900000	306840000	370200000	372270000	300840000	479080000	972150000	1614700000	2508900000	1897100000	1923400000	721300000	2465400000	1940300000	1369300000	1141600000	2122800000	1573600000	1064000000	1400000000	1703100000	1090100000
ELAVL1	Q15717	Q15717	sp|Q15717|ELAV1_HUMAN ELAV-like protein 1 OS=Homo sapiens OX=9606 GN=ELAVL1 PE=1 SV=2	17	19	25476000000	922970000	878170000	452490000	810560000	689610000	1440900000	1919200000	1213200000	1458300000	1415700000	780030000	1458800000	1086600000	1105300000	1369700000	1607400000	1206100000	601560000	1526600000	1178000000	1123300000	1231500000	1018500000	1044400000	827630000	898070000	868600000	1504000000	1721500000	1487800000	1566100000	1552700000	1421700000	1490400000	1511800000	1405000000	1541000000	1734900000	1376400000	1281000000	1501500000	1357700000	1472900000
L1TD1	Q5T7N2	Q5T7N2	sp|Q5T7N2|LITD1_HUMAN LINE-1 type transposase domain-containing protein 1 OS=Homo sapiens OX=9606 GN=L1TD1 PE=1 SV=1	44	44	25345000000	4607800000	6838200000	4479500000	4266100000	3990000000	47702000	99471000	89664000	108670000	94685000	4854500	83085000	59841000	68166000	101960000	71195000	84400000	0	72972000	90381000	36899000	49001000	4307100000	8623000000	4988800000	4575400000	5088800000	11835000	15523000	0	20623000	18001000	0	0	14918000	16182000	17702000	0	17088000	0	0	15861000	10211000
RPS6	P62753	P62753	sp|P62753|RS6_HUMAN 40S ribosomal protein S6 OS=Homo sapiens OX=9606 GN=RPS6 PE=1 SV=1	15	15	25334000000	2845900000	1831800000	2046500000	2773800000	2312100000	865000000	1238300000	773290000	663600000	638390000	673960000	1309900000	708300000	620520000	1084300000	921560000	727590000	163900000	1041200000	806630000	709590000	577990000	2223700000	2124800000	2336900000	2208300000	2758700000	1132200000	1148900000	1143900000	788000000	1081700000	1282700000	1409700000	1132900000	1113400000	1166400000	1020100000	877880000	716350000	1091000000	879200000	1061300000
RPL8	P62917	P62917	sp|P62917|RL8_HUMAN 60S ribosomal protein L8 OS=Homo sapiens OX=9606 GN=RPL8 PE=1 SV=2	13	13	25331000000	3154600000	2400900000	2460500000	2667400000	2986200000	882710000	773810000	646360000	413680000	622190000	751710000	903430000	694220000	568270000	1003800000	497260000	622330000	430120000	759020000	669560000	675440000	747460000	2970600000	2779800000	3030100000	2665200000	3518800000	971180000	702620000	782430000	679280000	789070000	1251100000	1062100000	920280000	818760000	976190000	790500000	855490000	911960000	928240000	787820000	1026500000
RPS27	P42677	P42677	sp|P42677|RS27_HUMAN 40S ribosomal protein S27 OS=Homo sapiens OX=9606 GN=RPS27 PE=1 SV=3	3	6	25279000000	2004700000	1591700000	1683400000	1873800000	1495500000	1228200000	1401300000	779380000	1024200000	1005400000	772070000	1165200000	784320000	772290000	1250000000	1012900000	842240000	580170000	1299300000	1002600000	799820000	910480000	1983800000	1940000000	1980600000	1905500000	1710300000	1344400000	1281000000	1117100000	1180800000	1222100000	1416400000	1253900000	1191600000	1178400000	1308000000	1216700000	1126800000	1147800000	1250100000	1124100000	1176900000
AARS	P49588	P49588	sp|P49588|SYAC_HUMAN Alanine--tRNA ligase, cytoplasmic OS=Homo sapiens OX=9606 GN=AARS1 PE=1 SV=2	37	37	25226000000	2576600000	1269300000	1691200000	2488400000	1856800000	1060100000	1035200000	954470000	1067900000	974330000	729910000	766550000	809160000	791860000	1037700000	752700000	1106300000	537520000	1158300000	916810000	765320000	879080000	2556200000	1555100000	1938500000	2403100000	2069200000	1228700000	1052200000	1283800000	1206400000	1106100000	1148900000	1064600000	1142500000	1131800000	1175000000	1010800000	1187200000	1149600000	1136000000	1124700000	1153900000
SUPT16H	Q9Y5B9	Q9Y5B9	sp|Q9Y5B9|SP16H_HUMAN FACT complex subunit SPT16 OS=Homo sapiens OX=9606 GN=SUPT16H PE=1 SV=1	42	42	25223000000	1325100000	939220000	1108300000	1076400000	1102800000	1504800000	1575500000	892790000	1210300000	1153100000	858930000	1359600000	896280000	904890000	1330200000	1221900000	1267400000	752670000	1299000000	1236600000	1044300000	1163300000	1384900000	1251800000	1298600000	1198200000	1295100000	1558000000	1509000000	1166700000	1406300000	1271300000	1445500000	1458500000	1282500000	1409800000	1572100000	1434700000	1374100000	1370500000	1512300000	1389800000	1532200000
RTCB	Q9Y3I0	Q9Y3I0	sp|Q9Y3I0|RTCB_HUMAN RNA-splicing ligase RtcB homolog OS=Homo sapiens OX=9606 GN=RTCB PE=1 SV=1	24	24	25129000000	943950000	610730000	613860000	976970000	617590000	1413700000	1838100000	1219600000	1428200000	1290100000	669810000	1574000000	1015100000	856220000	1428400000	1503400000	1266200000	547240000	1810200000	1443700000	937130000	1125100000	989610000	793530000	847630000	948800000	878000000	1571800000	1494300000	1500800000	1368200000	1422500000	1368900000	1627500000	1352500000	1346000000	1495300000	1547300000	1399100000	1447600000	1613200000	1548100000	1475400000
GPI	P06744	P06744	sp|P06744|G6PI_HUMAN Glucose-6-phosphate isomerase OS=Homo sapiens OX=9606 GN=GPI PE=1 SV=4	19	24	25110000000	2149400000	1189900000	1411700000	2185100000	1433200000	728320000	1628500000	1206000000	1308500000	1279000000	547720000	1302000000	838150000	616110000	760050000	1388500000	934850000	556420000	943500000	1144100000	776720000	782380000	1947500000	1482600000	1617600000	1967800000	1868700000	851960000	1456300000	1375400000	1364600000	1415900000	944500000	1420200000	1000700000	858150000	908950000	1481600000	1086400000	1039100000	1096600000	1411100000	1012400000
BCLAF1	Q9NYF8	Q9NYF8	sp|Q9NYF8|BCLF1_HUMAN Bcl-2-associated transcription factor 1 OS=Homo sapiens OX=9606 GN=BCLAF1 PE=1 SV=2	19	19	25079000000	1013600000	1410600000	783250000	713580000	730000000	1412000000	1340500000	1023300000	1148500000	1213500000	946640000	1471600000	1281100000	1039600000	1212600000	1233100000	1350700000	1011900000	1247900000	1209100000	1162900000	1123000000	993600000	1753900000	1182900000	947450000	1107800000	1615100000	1277700000	1333600000	1445600000	1319200000	1339000000	1383500000	1519800000	1483000000	1670600000	1332000000	1560000000	1685200000	1481800000	1449800000	1500300000
TMPO	P42166	P42166	sp|P42166|LAP2A_HUMAN Lamina-associated polypeptide 2, isoform alpha OS=Homo sapiens OX=9606 GN=TMPO PE=1 SV=2	21	34	25061000000	944440000	816690000	881560000	874990000	884530000	1459900000	1496600000	1028800000	1273600000	1062300000	1134100000	1328300000	1182700000	1230700000	1477800000	1091200000	1046300000	987250000	1293600000	1182300000	1061400000	1321800000	1131500000	1314100000	1228500000	1071800000	1093400000	1574800000	1366600000	1351800000	1327900000	1298000000	1719100000	1344700000	1575300000	1661000000	1604300000	1321500000	1374600000	1645800000	1454800000	1284700000	1571600000
PRPF19	Q9UMS4	Q9UMS4	sp|Q9UMS4|PRP19_HUMAN Pre-mRNA-processing factor 19 OS=Homo sapiens OX=9606 GN=PRPF19 PE=1 SV=1	18	18	24926000000	829250000	915370000	643320000	868080000	606850000	1281200000	1591300000	1192300000	1234100000	1332000000	777480000	1616200000	1000100000	931370000	1298800000	1544500000	1229500000	772620000	1779400000	1387200000	965020000	1129500000	844850000	1170400000	829380000	952480000	820710000	1430300000	1517000000	1460400000	1366400000	1469300000	1465500000	1545900000	1558600000	1368400000	1436900000	1630200000	1407000000	1400700000	1641100000	1425100000	1486100000
SND1	Q7KZF4	Q7KZF4	sp|Q7KZF4|SND1_HUMAN Staphylococcal nuclease domain-containing protein 1 OS=Homo sapiens OX=9606 GN=SND1 PE=1 SV=1	41	41	24891000000	2458800000	1387300000	1790900000	2624000000	2029700000	1093600000	1066700000	825300000	887740000	920700000	664280000	971070000	775420000	742240000	1136500000	732520000	933020000	478680000	1004100000	883150000	690390000	795100000	2200700000	1671200000	2055300000	2437000000	2218500000	1303700000	1026900000	1052500000	999150000	1054300000	1179200000	1119700000	1175200000	1199600000	1205400000	961990000	1137600000	1127900000	1113900000	950260000	1210100000
CAPZB	P47756	P47756	sp|P47756|CAPZB_HUMAN F-actin-capping protein subunit beta OS=Homo sapiens OX=9606 GN=CAPZB PE=1 SV=5	24	24	24849000000	1137300000	756350000	848560000	981810000	891740000	1201800000	1711700000	1124800000	1418300000	1390100000	757780000	1461000000	977700000	957920000	1144400000	1270800000	1307000000	665500000	1542000000	1423200000	948530000	931110000	1170600000	977040000	1089500000	1145700000	1117000000	1348600000	1538800000	1385300000	1561800000	1476900000	1246000000	1444000000	1345500000	1353800000	1251200000	1423000000	1438000000	1278500000	1464400000	1468800000	1372300000
FABP5	Q01469;A8MUU1	Q01469	sp|Q01469|FABP5_HUMAN Fatty acid-binding protein 5 OS=Homo sapiens OX=9606 GN=FABP5 PE=1 SV=3	17	17	24725000000	2863000000	1650100000	2336800000	2950200000	2423100000	685030000	1035200000	665930000	846430000	902990000	373130000	984040000	651720000	545470000	612230000	1030500000	775980000	376960000	876760000	875000000	606870000	657810000	2644800000	1903600000	2481800000	2683700000	2512100000	928500000	959520000	899970000	950860000	1042100000	855310000	1077000000	1021300000	963060000	755720000	1209600000	971910000	1020500000	975380000	1100500000	925180000
RAD23B	P54727	P54727	sp|P54727|RD23B_HUMAN UV excision repair protein RAD23 homolog B OS=Homo sapiens OX=9606 GN=RAD23B PE=1 SV=1	17	19	24622000000	978710000	648350000	885500000	857010000	863140000	1238300000	1792700000	869440000	1599900000	1293600000	835800000	1380300000	783840000	824230000	1282700000	1630300000	1240100000	479890000	1495400000	1732200000	908270000	1002100000	1063000000	855810000	1140800000	917800000	1160800000	1395400000	1681500000	1164200000	1710500000	1576000000	1300500000	1464700000	1209300000	1294800000	1427600000	1705300000	1486200000	1083000000	1377400000	1725300000	1290500000
ACLY	P53396	P53396	sp|P53396|ACLY_HUMAN ATP-citrate synthase OS=Homo sapiens OX=9606 GN=ACLY PE=1 SV=3	41	41	24616000000	2408100000	1637600000	2295100000	2322800000	2262200000	967750000	926910000	778340000	657620000	750820000	530200000	872520000	685980000	718540000	951150000	769000000	797950000	516360000	1224700000	926060000	688610000	927820000	2256900000	1922900000	2495400000	2292900000	2509100000	1125000000	893160000	1011700000	811210000	917000000	1098300000	977570000	1054800000	1122900000	1120100000	927680000	950090000	1122000000	1081900000	986290000	1112800000
IMMT	Q16891	Q16891	sp|Q16891|MIC60_HUMAN MICOS complex subunit MIC60 OS=Homo sapiens OX=9606 GN=IMMT PE=1 SV=1	34	34	24555000000	1080100000	1212700000	983210000	818420000	981680000	1542500000	1380500000	892180000	1143300000	1096200000	1041600000	1094800000	902190000	1184800000	1427300000	994130000	969130000	858160000	1563600000	1374500000	742030000	1272100000	1204800000	1604500000	1165500000	1071800000	1206800000	1535300000	1323000000	1093900000	1360000000	1249200000	1603200000	1280100000	1458600000	1469800000	1521700000	1273600000	1243400000	1574300000	1469500000	1510900000	1397600000
SALL2	Q9Y467	Q9Y467	sp|Q9Y467|SALL2_HUMAN Sal-like protein 2 OS=Homo sapiens OX=9606 GN=SALL2 PE=1 SV=4	14	15	24545000000	421090000	625300000	392180000	954700000	386170000	1313300000	288970000	2165200000	255980000	1920400000	941530000	334640000	1684600000	1365000000	1144700000	1902600000	1948500000	182120000	1704700000	1560400000	1524500000	1528500000	1534300000	1386400000	1533400000	1472100000	1563900000	1622500000	1041100000	1151900000	963820000	1135700000	1616700000	1309300000	1465400000	1340800000	1608200000	1176900000	1232100000	1324000000	1458500000	1213100000	1565700000
DDX3X	O00571;Q9NQI0	O00571	sp|O00571|DDX3X_HUMAN ATP-dependent RNA helicase DDX3X OS=Homo sapiens OX=9606 GN=DDX3X PE=1 SV=3	10	32	24373000000	1474100000	1038900000	1262500000	1545500000	1181300000	1117900000	1281200000	932260000	1090700000	1116600000	885770000	1242800000	966170000	943960000	1261800000	1061700000	1016400000	634270000	1367300000	1059300000	900700000	991820000	1387800000	1304800000	1427900000	1403600000	1381700000	1440700000	1178200000	1241900000	1151400000	1289800000	1465100000	1419100000	1414100000	1472600000	1334000000	1180000000	1270400000	1435000000	1342300000	1241200000	1334900000
UGP2	Q16851	Q16851	sp|Q16851|UGPA_HUMAN UTP--glucose-1-phosphate uridylyltransferase OS=Homo sapiens OX=9606 GN=UGP2 PE=1 SV=5	27	27	24264000000	4082400000	2956000000	3156700000	4776000000	3769600000	289560000	473830000	434250000	392060000	470900000	111310000	372280000	305070000	208440000	276610000	419020000	394410000	109460000	365860000	374640000	247480000	277770000	4392000000	2829100000	3454900000	4496400000	4183800000	398910000	494460000	613260000	490380000	567560000	377580000	478290000	551100000	419550000	366520000	536220000	602150000	489070000	441600000	461630000	465370000
TALDO1	P37837	P37837	sp|P37837|TALDO_HUMAN Transaldolase OS=Homo sapiens OX=9606 GN=TALDO1 PE=1 SV=2	16	16	24165000000	1885200000	1267100000	1516300000	1803200000	1584400000	919590000	1303600000	1063400000	1225100000	1038600000	640450000	1099100000	833580000	747770000	927510000	1061500000	978560000	505190000	1073300000	1144600000	735360000	811980000	1860200000	1541200000	1740900000	1838300000	1860700000	1136800000	1235100000	1251400000	1352200000	1232600000	1070600000	1178100000	1156400000	1093600000	1082600000	1268700000	1234900000	1139000000	1075800000	1307800000	1190600000
STMN2	Q93045	Q93045	sp|Q93045|STMN2_HUMAN Stathmin-2 OS=Homo sapiens OX=9606 GN=STMN2 PE=1 SV=3	2	2	24053000000	810840000	455950000	666690000	884010000	677860000	1028500000	1625400000	1746800000	1824200000	1739100000	708270000	1162800000	1191200000	1010600000	922400000	1263200000	1350000000	710490000	1037700000	1127700000	1083100000	1026000000	0	0	0	0	0	1094000000	0	2383700000	0	0	0	0	0	0	0	0	0	0	0	0	0
SRSF2	Q01130	Q01130	sp|Q01130|SRSF2_HUMAN Serine/arginine-rich splicing factor 2 OS=Homo sapiens OX=9606 GN=SRSF2 PE=1 SV=4	5	7	23968000000	1104200000	771690000	1138700000	601140000	605880000	1334400000	1476500000	930250000	1296100000	1209300000	857080000	1248500000	946520000	973920000	1486500000	1292100000	1119100000	508440000	1519500000	1367900000	1006900000	1172900000	1108500000	1002000000	1507200000	1070400000	1329600000	1457200000	1251000000	1001800000	1296400000	1294200000	1429500000	1153900000	1236700000	1363900000	1442300000	1426700000	1302300000	1279500000	1432400000	1420200000	1376100000
PSMC4	P43686	P43686	sp|P43686|PRS6B_HUMAN 26S proteasome regulatory subunit 6B OS=Homo sapiens OX=9606 GN=PSMC4 PE=1 SV=2	29	29	23959000000	1221100000	825370000	843160000	1074600000	860410000	1158900000	1363900000	1278700000	1249900000	1216100000	622630000	1289800000	1075400000	977100000	1155400000	1301700000	1132300000	557580000	1591500000	1209600000	932130000	1022100000	1239700000	1060400000	1187700000	1240900000	1267300000	1319400000	1284300000	1499800000	1313100000	1319700000	1181500000	1268700000	1472000000	1383500000	1278400000	1339900000	1312100000	1493000000	1433000000	1308600000	1312500000
ATIC	P31939	P31939	sp|P31939|PUR9_HUMAN Bifunctional purine biosynthesis protein ATIC OS=Homo sapiens OX=9606 GN=ATIC PE=1 SV=3	36	36	23906000000	2036900000	1494600000	1936700000	2194200000	2033400000	776020000	1272300000	849010000	934890000	1016400000	514280000	927640000	838760000	738610000	853650000	923990000	968130000	373010000	785320000	923650000	747070000	767710000	1992900000	1730600000	1983900000	2114200000	2488800000	987760000	1120900000	1112500000	1042700000	1118800000	954440000	999070000	1145900000	1117800000	844100000	1043000000	1122500000	968290000	844750000	975690000	1060400000
VDAC2	P45880	P45880	sp|P45880|VDAC2_HUMAN Voltage-dependent anion-selective channel protein 2 OS=Homo sapiens OX=9606 GN=VDAC2 PE=1 SV=2	13	13	23775000000	1319000000	1338600000	983160000	1513600000	1064600000	1317500000	1201400000	1136500000	1104800000	1230200000	525320000	1228500000	989910000	897600000	1093900000	1209000000	816400000	553420000	1225100000	1115300000	881010000	1030200000	1271400000	1458300000	1172300000	1390900000	1278600000	1289200000	1144800000	1372000000	1166600000	1259600000	1077400000	1249400000	1338100000	1226100000	1207100000	1284100000	1309700000	1132000000	1152900000	1105300000	1148900000
ATP1A1	P05023;P20648	P05023	sp|P05023|AT1A1_HUMAN Sodium/potassium-transporting ATPase subunit alpha-1 OS=Homo sapiens OX=9606 GN=ATP1A1 PE=1 SV=1	24	39	23692000000	1773700000	1396400000	1665900000	1839700000	1513200000	951210000	1259300000	859400000	810810000	929040000	718090000	1059700000	849050000	831780000	1008400000	957640000	862870000	621380000	972570000	1101200000	843700000	866700000	1846500000	1700200000	1876100000	1773400000	1823000000	1191500000	1231900000	1084000000	1030500000	1051600000	1199600000	1260600000	1183100000	1150900000	1170300000	1186400000	1110600000	1180600000	1083300000	1261500000	1165000000
HMGN3	Q15651	Q15651	sp|Q15651|HMGN3_HUMAN High mobility group nucleosome-binding domain-containing protein 3 OS=Homo sapiens OX=9606 GN=HMGN3 PE=1 SV=2	2	3	23452000000	478220000	710640000	621260000	1153900000	1161300000	1232400000	2075300000	490170000	2992400000	889640000	902630000	886710000	425170000	403020000	3000300000	1617000000	616880000	232910000	1178200000	1287900000	572710000	523010000	597510000	796210000	1032300000	1272700000	1393200000	1515900000	2020800000	746390000	2605000000	1143400000	1381800000	1065400000	769310000	811290000	2639400000	1626000000	838390000	373720000	1361900000	1368400000	972240000
GOT2	P00505	P00505	sp|P00505|AATM_HUMAN Aspartate aminotransferase, mitochondrial OS=Homo sapiens OX=9606 GN=GOT2 PE=1 SV=3	25	25	23446000000	1445000000	1767300000	1200100000	1254200000	995220000	1083600000	1190600000	941580000	1184700000	913490000	749460000	1156400000	780880000	868590000	1102800000	1136300000	873730000	734560000	1242800000	1146200000	794530000	883690000	1482500000	2170500000	1408000000	1292900000	1194500000	1256500000	1163900000	1218200000	1215600000	1164600000	1238300000	1275100000	1043100000	1091400000	1269700000	1353900000	1108900000	1289800000	1243300000	1262900000	1205600000
40057	Q9UHD8	Q9UHD8	sp|Q9UHD8|SEPT9_HUMAN Septin-9 OS=Homo sapiens OX=9606 GN=SEPTIN9 PE=1 SV=2	27	27	23425000000	982100000	726660000	779210000	1031600000	859940000	1005900000	1438700000	1153800000	1356500000	1418400000	730290000	1266700000	1150500000	926200000	987680000	1104100000	1271500000	638290000	1222800000	1275300000	1023200000	1075500000	1077800000	1058400000	1184300000	1102700000	1099100000	1194700000	1364900000	1422100000	1492800000	1507800000	1308400000	1388300000	1413500000	1350700000	1140300000	1335700000	1383100000	1355900000	1224900000	1355700000	1366300000
HMGA2	P52926	P52926	sp|P52926|HMGA2_HUMAN High mobility group protein HMGI-C OS=Homo sapiens OX=9606 GN=HMGA2 PE=1 SV=1	5	5	23386000000	400650000	351730000	368370000	390040000	309500000	1521400000	2042700000	924870000	1123300000	1181100000	1057500000	1482700000	1201700000	1223800000	1550300000	1524600000	990040000	836760000	1289400000	1340200000	1100400000	1174400000	439110000	486770000	616680000	470100000	533960000	1899000000	1941300000	1080300000	1283900000	1249700000	1700100000	1557600000	1551900000	1573600000	1992500000	1608900000	1164500000	1541100000	1456200000	1493500000	1543500000
PSMD1	Q99460	Q99460	sp|Q99460|PSMD1_HUMAN 26S proteasome non-ATPase regulatory subunit 1 OS=Homo sapiens OX=9606 GN=PSMD1 PE=1 SV=2	34	34	23229000000	1274200000	831760000	938260000	991090000	964840000	1049900000	1342200000	951070000	1214500000	1069200000	648430000	1261400000	978240000	1059400000	1200500000	1122800000	1152800000	891300000	1255900000	1174700000	827730000	1028900000	1216600000	1127500000	1236200000	1102800000	1261400000	1208500000	1135700000	1039600000	1159400000	1134400000	1055500000	1114900000	1205900000	1195500000	1212700000	1187000000	1202800000	1194200000	1394200000	1192700000	1104500000
DDB1	Q16531	Q16531	sp|Q16531|DDB1_HUMAN DNA damage-binding protein 1 OS=Homo sapiens OX=9606 GN=DDB1 PE=1 SV=1	44	44	23217000000	952410000	730710000	781340000	985540000	723540000	896530000	1642200000	1020000000	1319500000	1257900000	772760000	1441100000	815330000	826630000	1074700000	1508600000	1098300000	609680000	1344000000	1508100000	866210000	1042000000	1061800000	1121800000	1161900000	1080400000	1066300000	1192900000	1481400000	1329400000	1376000000	1439400000	1261200000	1380400000	1286600000	1153400000	1159900000	1468400000	1387300000	1157800000	1315800000	1441600000	1294800000
SRSF7	Q16629	Q16629	sp|Q16629|SRSF7_HUMAN Serine/arginine-rich splicing factor 7 OS=Homo sapiens OX=9606 GN=SRSF7 PE=1 SV=1	10	10	23107000000	931390000	804080000	723120000	852960000	661270000	1077400000	1410600000	1140300000	1067300000	1195000000	885830000	1411700000	1056300000	976750000	1228600000	1204100000	1155800000	668940000	1443100000	1191600000	924730000	1096100000	955940000	1022700000	899870000	966700000	786650000	1343700000	1303800000	1355500000	1168700000	1342400000	1477600000	1534800000	1491800000	1307500000	1371700000	1348600000	1382900000	1308700000	1356600000	1199700000	1325000000
PSMC2	P35998	P35998	sp|P35998|PRS7_HUMAN 26S proteasome regulatory subunit 7 OS=Homo sapiens OX=9606 GN=PSMC2 PE=1 SV=3	33	33	23051000000	1214200000	859410000	903100000	1263500000	901920000	1248700000	1315000000	944930000	1245800000	1044800000	851210000	1039900000	824580000	878940000	1251600000	1136600000	1048400000	615860000	1506900000	1126800000	827720000	1001400000	1262200000	1066900000	1204300000	1211100000	1176300000	1378400000	1191100000	1197100000	1290500000	1277400000	1297200000	1133500000	1231200000	1332800000	1305000000	1222600000	1270000000	1285500000	1375700000	1189400000	1305700000
DHX15	O43143	O43143	sp|O43143|DHX15_HUMAN ATP-dependent RNA helicase DHX15 OS=Homo sapiens OX=9606 GN=DHX15 PE=1 SV=2	33	34	23012000000	1174000000	1126900000	1161100000	1070100000	1210300000	1146800000	1272100000	1172600000	905740000	816640000	789340000	1092000000	947850000	955820000	1156200000	1109800000	1065200000	643590000	1158000000	937150000	1023800000	1077400000	1321800000	1466600000	1362200000	1265600000	1455100000	1232100000	1179200000	1185300000	1085900000	1064300000	1229400000	1161000000	1224900000	1272900000	1268500000	1232700000	1155300000	1330000000	1263600000	1172500000	1272900000
EFTUD2	Q15029	Q15029	sp|Q15029|U5S1_HUMAN 116 kDa U5 small nuclear ribonucleoprotein component OS=Homo sapiens OX=9606 GN=EFTUD2 PE=1 SV=1	40	40	22920000000	869740000	1300000000	879270000	1060400000	797050000	1157600000	1691300000	910960000	1275400000	1215000000	711660000	1196500000	790150000	800540000	1078900000	1294700000	1061300000	488130000	1387700000	1360800000	765140000	827560000	1008600000	1332600000	1079300000	1077600000	1050900000	1276800000	1385700000	1207000000	1202700000	1278800000	1307300000	1269100000	1213600000	1258100000	1315500000	1304600000	1255200000	1252800000	1375900000	1309200000	1189200000
CLU	P10909	P10909	sp|P10909|CLUS_HUMAN Clusterin OS=Homo sapiens OX=9606 GN=CLU PE=1 SV=1	16	16	22832000000	66778000	72407000	54067000	70571000	40380000	1182400000	1614800000	1384600000	1580000000	1478000000	821610000	1153900000	1481000000	1593700000	1176400000	1204700000	1396700000	936420000	1514700000	1246100000	1175500000	1587400000	25149000	46320000	38448000	28887000	48365000	1119800000	1724900000	1880900000	1929000000	1289400000	1331200000	1392700000	2208900000	2435600000	1471200000	1034500000	1806800000	1695800000	1573700000	1415100000	1913900000
PSMC5	P62195	P62195	sp|P62195|PRS8_HUMAN 26S proteasome regulatory subunit 8 OS=Homo sapiens OX=9606 GN=PSMC5 PE=1 SV=1	23	24	22729000000	1159400000	758810000	875720000	1032800000	906110000	1013500000	1318300000	842280000	1105700000	1102400000	924290000	1107400000	944920000	1035700000	1067400000	1205100000	1183400000	814810000	1407800000	1133300000	903870000	885660000	1161200000	1016500000	1061300000	1134200000	1114200000	1150800000	1223400000	1122100000	1134400000	1198500000	1214800000	1098100000	1203500000	1275300000	1171000000	1201000000	1208700000	1278100000	1373900000	1239200000	1187400000
SF3A1	Q15459	Q15459	sp|Q15459|SF3A1_HUMAN Splicing factor 3A subunit 1 OS=Homo sapiens OX=9606 GN=SF3A1 PE=1 SV=1	32	32	22600000000	1188000000	1261000000	1082900000	1161300000	939740000	957950000	1418800000	997460000	1248700000	1195100000	631220000	968410000	780830000	761850000	1079400000	1193000000	1067300000	542550000	1241000000	1274700000	752270000	856510000	1227600000	1532800000	1325500000	1196600000	1207900000	1180300000	1249200000	1249300000	1386300000	1252900000	1197100000	1120300000	1158500000	1158500000	1113500000	1236500000	1236600000	1134500000	1229000000	1280500000	1152100000
NUDC	Q9Y266	Q9Y266	sp|Q9Y266|NUDC_HUMAN Nuclear migration protein nudC OS=Homo sapiens OX=9606 GN=NUDC PE=1 SV=1	19	19	22530000000	1886500000	1190200000	1529800000	1529200000	1687900000	837260000	1165200000	831290000	1140800000	1056700000	514990000	965360000	719310000	673090000	909180000	939690000	905620000	487280000	1059300000	1026500000	694120000	780510000	1705400000	1437300000	1662800000	1638300000	1759200000	1040500000	1114800000	1264400000	1181400000	1292800000	898160000	1147700000	1132200000	1103700000	930620000	1047800000	1138800000	1066600000	1023500000	1132900000	1082500000
RPS9	P46781	P46781	sp|P46781|RS9_HUMAN 40S ribosomal protein S9 OS=Homo sapiens OX=9606 GN=RPS9 PE=1 SV=3	18	18	22487000000	2456500000	1568400000	2315900000	1887300000	2300300000	720090000	1017800000	527320000	628920000	642110000	692990000	658730000	577660000	674920000	992930000	673880000	691110000	484290000	915900000	737180000	629500000	693180000	2306000000	2123800000	2557600000	2093300000	2617700000	835920000	1096300000	763070000	829230000	816190000	1101100000	818740000	817010000	881480000	1223500000	830000000	832140000	829470000	1004800000	868130000	831510000
AP2B1	P63010	P63010	sp|P63010|AP2B1_HUMAN AP-2 complex subunit beta OS=Homo sapiens OX=9606 GN=AP2B1 PE=1 SV=1	22	38	22426000000	1043000000	722170000	716430000	1060500000	801640000	1109000000	1382300000	896530000	1429500000	1271700000	704600000	1194700000	782440000	809220000	1127800000	1312400000	1050100000	501460000	1365500000	1369600000	820630000	954630000	1105400000	936900000	1025200000	1083800000	1069800000	1215400000	1340000000	1247600000	1499700000	1382200000	1219900000	1190100000	1243100000	1181500000	1174300000	1335500000	1262300000	1215900000	1285700000	1319500000	1267900000
GLUD1;GLUD2	P00367;P49448	P00367;P49448	sp|P00367|DHE3_HUMAN Glutamate dehydrogenase 1, mitochondrial OS=Homo sapiens OX=9606 GN=GLUD1 PE=1 SV=2;sp|P49448|DHE4_HUMAN Glutamate dehydrogenase 2, mitochondrial OS=Homo sapiens OX=9606 GN=GLUD2 PE=1 SV=2	24	24	22407000000	575730000	786680000	410820000	671690000	460430000	1370300000	1533500000	992740000	1125600000	1144000000	830390000	1412300000	949190000	950740000	1290900000	1383400000	1011300000	735080000	1555000000	1180800000	958850000	1077700000	661240000	952790000	586170000	750780000	642590000	1508100000	1371500000	1278600000	1204900000	1262400000	1500500000	1384500000	1387000000	1421100000	1344700000	1417000000	1296100000	1488800000	1497600000	1222600000	1409900000
ALDH7A1	P49419	P49419	sp|P49419|AL7A1_HUMAN Alpha-aminoadipic semialdehyde dehydrogenase OS=Homo sapiens OX=9606 GN=ALDH7A1 PE=1 SV=5	24	24	22375000000	827870000	689690000	554360000	831800000	619150000	1126200000	1404300000	1107300000	1335800000	1196900000	774800000	1322300000	898090000	874460000	1243000000	1266300000	1121400000	663790000	1341900000	1317300000	916750000	941080000	809610000	871470000	751550000	850730000	751260000	1317900000	1466000000	1429800000	1381800000	1404000000	1427200000	1377800000	1305700000	1247700000	1270600000	1335600000	1355300000	1273700000	1302500000	1313600000	1283100000
MIF	P14174	P14174	sp|P14174|MIF_HUMAN Macrophage migration inhibitory factor OS=Homo sapiens OX=9606 GN=MIF PE=1 SV=4	4	4	22367000000	1385900000	865940000	1005300000	1658600000	1357900000	826640000	1839400000	1163700000	1163300000	1190400000	552880000	1221900000	662000000	705870000	870890000	1377800000	898190000	505460000	1014100000	859130000	621670000	619560000	1350800000	996290000	1233200000	1632700000	1647400000	975730000	1584700000	1502800000	1214000000	1303500000	958120000	1300700000	973990000	1014000000	883720000	1398000000	1100000000	1088800000	954030000	837830000	971790000
ANXA5	P08758	P08758	sp|P08758|ANXA5_HUMAN Annexin A5 OS=Homo sapiens OX=9606 GN=ANXA5 PE=1 SV=2	24	24	22350000000	1480300000	926870000	1160500000	1579900000	1090400000	870530000	1237200000	957170000	1035500000	1015600000	615510000	1185600000	791230000	797190000	1117500000	1182300000	858480000	470680000	1226800000	1271500000	728930000	750400000	1561100000	1153100000	1501800000	1398800000	1396000000	1078800000	1188700000	1120100000	1133700000	1086400000	1187800000	1248800000	1127300000	1105900000	1199300000	1208900000	995790000	1182700000	1188300000	1310500000	1074400000
IGF2BP2	Q9Y6M1	Q9Y6M1	sp|Q9Y6M1|IF2B2_HUMAN Insulin-like growth factor 2 mRNA-binding protein 2 OS=Homo sapiens OX=9606 GN=IGF2BP2 PE=1 SV=2	24	24	22287000000	283990000	221800000	216530000	312430000	234690000	1282600000	1617500000	1024100000	1327100000	1418000000	922110000	1551800000	1191000000	1011600000	1244500000	1478700000	1202800000	634700000	1572600000	1386600000	1022000000	1129900000	598900000	516430000	478460000	539370000	472380000	1428300000	1410200000	1461900000	1460400000	1512500000	1359000000	1595100000	1552900000	1376600000	1342800000	1633100000	1371900000	1211600000	1531300000	1510100000	1517600000
TARDBP	Q13148	Q13148	sp|Q13148|TADBP_HUMAN TAR DNA-binding protein 43 OS=Homo sapiens OX=9606 GN=TARDBP PE=1 SV=1	11	11	22274000000	889820000	789810000	843730000	761110000	894330000	1134400000	1185900000	1262400000	844100000	1131200000	910750000	1178200000	962490000	998640000	991850000	1144800000	1154400000	790470000	1250600000	1042700000	955930000	1156700000	973010000	971620000	1016200000	891270000	1013300000	1316800000	1265600000	1453300000	1372700000	1339900000	1380400000	1417600000	1364100000	1402600000	1197600000	1321100000	1253900000	1522200000	1266500000	1176400000	1308400000
HSPH1	Q92598	Q92598	sp|Q92598|HS105_HUMAN Heat shock protein 105 kDa OS=Homo sapiens OX=9606 GN=HSPH1 PE=1 SV=1	30	31	22199000000	1757000000	841320000	1319700000	1644100000	1400300000	1086800000	1064800000	875140000	834570000	894540000	647530000	918270000	871040000	812590000	993750000	903180000	937220000	562970000	1178400000	939750000	801510000	914950000	1723400000	1185100000	1473400000	1647900000	1492800000	1119300000	991650000	1117000000	1050000000	1078800000	1051600000	1076800000	1196500000	1206900000	1108900000	1042100000	1180500000	1086000000	1200800000	1117600000	1195200000
RUVBL1	Q9Y265	Q9Y265	sp|Q9Y265|RUVB1_HUMAN RuvB-like 1 OS=Homo sapiens OX=9606 GN=RUVBL1 PE=1 SV=1	25	25	22193000000	1182700000	943950000	952480000	1161200000	966290000	1128900000	1362700000	902700000	1033400000	950710000	671240000	1203500000	865150000	852940000	1086300000	1034600000	912750000	771350000	1313300000	1181600000	763000000	951940000	1216800000	1141900000	1178800000	1258700000	1128100000	1189500000	1220800000	1216000000	1112400000	1177800000	1130000000	1230100000	1207700000	1303600000	1198000000	1270600000	1178000000	1087900000	1356900000	1237100000	1168200000
SRRM2	Q9UQ35	Q9UQ35	sp|Q9UQ35|SRRM2_HUMAN Serine/arginine repetitive matrix protein 2 OS=Homo sapiens OX=9606 GN=SRRM2 PE=1 SV=2	40	40	21946000000	1142300000	1266200000	1096300000	961510000	929590000	1115800000	1222400000	858650000	1064900000	1095900000	664350000	949880000	869340000	866320000	1080900000	1004400000	950120000	654890000	1290700000	1166700000	831460000	863860000	1186400000	1390100000	1443200000	1075100000	1217700000	1236400000	1114200000	1278100000	1189000000	1278000000	1175800000	1092100000	1286300000	1274100000	1092900000	1059800000	1196900000	1338700000	1167300000	1147000000	1260600000
LMNB2	Q03252	Q03252	sp|Q03252|LMNB2_HUMAN Lamin-B2 OS=Homo sapiens OX=9606 GN=LMNB2 PE=1 SV=4	44	44	21723000000	622740000	1028800000	561570000	769220000	500790000	923840000	1490600000	1201900000	1312100000	1115000000	627930000	1389100000	746380000	830340000	1067400000	1152500000	1189900000	793920000	1438900000	1234000000	916600000	809400000	918530000	1261700000	812830000	901320000	833220000	1070800000	1302000000	1299000000	1444100000	1294900000	1247900000	1211900000	1187300000	1225400000	1229400000	1327800000	1336100000	1192100000	1250400000	1372000000	1204000000
RPS5	P46782	P46782	sp|P46782|RS5_HUMAN 40S ribosomal protein S5 OS=Homo sapiens OX=9606 GN=RPS5 PE=1 SV=4	12	12	21543000000	2077200000	1578300000	1497100000	2042500000	2177000000	1035700000	941240000	337730000	482910000	525360000	743960000	906390000	537610000	546880000	1405900000	546650000	498650000	491550000	1208400000	652820000	594160000	714920000	1951000000	1697700000	1544800000	2015000000	2482100000	1077300000	905030000	600090000	635530000	719380000	1017300000	1085900000	822500000	1017400000	1477700000	733380000	769340000	861150000	1162700000	784120000	890850000
CACYBP	Q9HB71	Q9HB71	sp|Q9HB71|CYBP_HUMAN Calcyclin-binding protein OS=Homo sapiens OX=9606 GN=CACYBP PE=1 SV=2	19	19	21430000000	1624700000	1068100000	1002700000	1717100000	1183200000	900780000	1153800000	810210000	1088000000	948080000	536980000	960770000	737380000	680910000	939850000	1082300000	918530000	401110000	1173100000	961220000	671810000	869050000	1634100000	1361700000	1328000000	1655100000	1420300000	1041700000	1104100000	1033400000	1135500000	1097700000	913470000	1037800000	1077800000	1069300000	1059100000	1169600000	1121200000	943840000	1171500000	1045500000	926320000
CCAR2	Q8N163	Q8N163	sp|Q8N163|CCAR2_HUMAN Cell cycle and apoptosis regulator protein 2 OS=Homo sapiens OX=9606 GN=CCAR2 PE=1 SV=2	36	36	21362000000	786560000	840060000	626600000	754540000	614510000	972590000	1498500000	1078900000	1129600000	1109800000	701640000	1114000000	983360000	922910000	1024600000	1152800000	1107700000	790210000	1266300000	1152900000	851690000	882610000	899180000	1028800000	924630000	858350000	795420000	1276600000	1268900000	1239100000	1326800000	1254200000	1228400000	1252100000	1296000000	1341300000	1215100000	1247700000	1228000000	1351900000	1256700000	1290500000	1222700000
EIF4G1	Q04637;REV__Q8NEG2	Q04637	sp|Q04637|IF4G1_HUMAN Eukaryotic translation initiation factor 4 gamma 1 OS=Homo sapiens OX=9606 GN=EIF4G1 PE=1 SV=4	38	44	21257000000	2093400000	1301800000	1746300000	2075800000	1752400000	761950000	1054700000	555670000	832830000	739880000	565260000	751610000	673620000	567030000	1012200000	661960000	723930000	437280000	1016200000	709940000	530510000	692230000	1742300000	1461100000	1694200000	1698800000	1638500000	1035100000	991660000	784930000	1080200000	959470000	1035600000	902540000	956610000	1045900000	1085400000	895280000	1010300000	976570000	1114700000	907960000	1101500000
CRABP2	P29373	P29373	sp|P29373|RABP2_HUMAN Cellular retinoic acid-binding protein 2 OS=Homo sapiens OX=9606 GN=CRABP2 PE=1 SV=2	13	13	21171000000	491430000	166230000	167960000	476670000	243520000	976530000	1751000000	1226800000	1633300000	1399100000	642810000	1256600000	960200000	907070000	965830000	1416400000	1441300000	624460000	1187000000	1308000000	933210000	995740000	666760000	272620000	318270000	620380000	388540000	1249000000	1699100000	1373800000	1914200000	1534500000	1097600000	1334000000	1338600000	1234200000	1319500000	1489200000	1421100000	1208800000	1286400000	1432300000	1220900000
RANGAP1	P46060	P46060	sp|P46060|RAGP1_HUMAN Ran GTPase-activating protein 1 OS=Homo sapiens OX=9606 GN=RANGAP1 PE=1 SV=1	34	34	21038000000	1638900000	1707400000	1170100000	2069900000	1882400000	801280000	855880000	535770000	825930000	774040000	831550000	1011500000	584530000	483440000	832850000	793320000	665480000	343520000	926570000	785320000	808250000	710220000	1303100000	1607500000	1592100000	1324000000	1366500000	1031700000	989950000	959550000	937990000	1042600000	1168400000	932100000	1289100000	1077600000	1067900000	1039900000	1003100000	1213000000	1094600000	942840000	1049500000
TARS	P26639	P26639	sp|P26639|SYTC_HUMAN Threonine--tRNA ligase 1, cytoplasmic OS=Homo sapiens OX=9606 GN=TARS1 PE=1 SV=3	35	37	21017000000	2627600000	1675500000	2322200000	2386200000	2343100000	667180000	684510000	449220000	665460000	517890000	508450000	567600000	472110000	523350000	740300000	521650000	558120000	326440000	784490000	569960000	536310000	569300000	2240000000	1845300000	2297100000	2094600000	2445500000	884800000	713050000	746130000	833660000	727730000	834300000	675160000	814230000	845410000	867260000	699140000	896040000	766090000	856030000	752880000	884610000
TPM3	P06753	P06753	sp|P06753|TPM3_HUMAN Tropomyosin alpha-3 chain OS=Homo sapiens OX=9606 GN=TPM3 PE=1 SV=2	10	10	20905000000	1598800000	1308800000	1089000000	1582000000	1173400000	880630000	1557600000	724050000	1101900000	910210000	387830000	1018400000	554340000	477920000	962950000	1161200000	818230000	219420000	1086100000	1184400000	535150000	572240000	1552000000	1514400000	1218800000	1710200000	1327800000	1079800000	1431800000	783190000	1120500000	938070000	649670000	1057700000	768010000	693850000	1104300000	1295100000	935570000	763510000	1146500000	1313000000	836510000
40787	Q9NVA2	Q9NVA2	sp|Q9NVA2|SEP11_HUMAN Septin-11 OS=Homo sapiens OX=9606 GN=SEPTIN11 PE=1 SV=3	11	20	20873000000	534970000	320990000	432210000	519840000	396760000	1026200000	1676700000	1132500000	1418900000	1256900000	633710000	1287300000	876390000	762470000	1132100000	1393200000	1100900000	625130000	1268100000	1346800000	816310000	914610000	668050000	543380000	604860000	631100000	673640000	1196800000	1447500000	1270500000	1503400000	1434900000	1172000000	1145800000	1140600000	1103900000	1237200000	1411800000	1361600000	1256700000	1153800000	1375500000	1198300000
SSRP1	Q08945	Q08945	sp|Q08945|SSRP1_HUMAN FACT complex subunit SSRP1 OS=Homo sapiens OX=9606 GN=SSRP1 PE=1 SV=1	29	29	20825000000	1099100000	748860000	883450000	972170000	913430000	1088300000	1293600000	776200000	1075600000	920690000	606710000	1177500000	802630000	564960000	1052300000	1139700000	967060000	411110000	1347600000	1140900000	842410000	1000700000	1039800000	906580000	982850000	942250000	1015200000	1151300000	1147800000	1080400000	1159800000	1101600000	1056100000	1217000000	1215300000	1155300000	1084100000	1193800000	1172300000	1005200000	1273300000	1166800000	1169000000
KIF5B	P33176	P33176	sp|P33176|KINH_HUMAN Kinesin-1 heavy chain OS=Homo sapiens OX=9606 GN=KIF5B PE=1 SV=1	36	45	20820000000	444740000	250590000	264850000	335870000	310770000	1153200000	1534900000	1068300000	1456600000	1290900000	760690000	1362100000	983800000	738110000	1122000000	1331100000	1206800000	559300000	1484400000	1374600000	825720000	960290000	582330000	467750000	534510000	594800000	575220000	1293000000	1322800000	1350500000	1378400000	1377000000	1234500000	1356300000	1336900000	1273900000	1207100000	1331400000	1343000000	1402200000	1314700000	1382200000	1246300000
ACTB	P60709;Q9BYX7	P60709	sp|P60709|ACTB_HUMAN Actin, cytoplasmic 1 OS=Homo sapiens OX=9606 GN=ACTB PE=1 SV=1	1	1	20784000000	1429800000	539920000	1093900000	1132000000	1236800000	991900000	1189100000	933000000	1056500000	1065700000	797260000	869370000	729920000	817870000	799210000	898440000	856980000	810820000	1130600000	936070000	737790000	730650000	0	0	0	0	0	0	0	0	0	0	0	0	0	0	0	0	0	0	0	0	0
XPO1	O14980	O14980	sp|O14980|XPO1_HUMAN Exportin-1 OS=Homo sapiens OX=9606 GN=XPO1 PE=1 SV=1	35	35	20714000000	1384500000	882300000	1103500000	1456300000	1146400000	827880000	1334100000	691330000	1147800000	873330000	510770000	1092300000	695220000	611490000	1130900000	1012700000	812360000	296590000	1207000000	1197200000	603980000	695880000	1229600000	1018100000	1231300000	1232800000	1257900000	993730000	1170100000	1044900000	1199900000	1069900000	877460000	1172200000	958150000	939570000	1199500000	1134800000	1076300000	771260000	1152300000	1179400000	946500000
CBX3	Q13185	Q13185	sp|Q13185|CBX3_HUMAN Chromobox protein homolog 3 OS=Homo sapiens OX=9606 GN=CBX3 PE=1 SV=4	7	7	20711000000	1242700000	1083300000	923430000	1223500000	1056800000	951530000	1179100000	810340000	897050000	914450000	578120000	1105400000	786730000	788430000	919470000	999400000	811450000	470930000	1237800000	1099200000	678730000	953480000	1280300000	1412700000	1203600000	1303000000	1277500000	1101900000	1177800000	995380000	1034500000	1041600000	1105400000	1111000000	1083000000	1147900000	971900000	1080300000	960080000	960240000	1192300000	1145200000	1081700000
ATP2A2	P16615;O14983	P16615	sp|P16615|AT2A2_HUMAN Sarcoplasmic/endoplasmic reticulum calcium ATPase 2 OS=Homo sapiens OX=9606 GN=ATP2A2 PE=1 SV=1	27	32	20702000000	1255300000	1054600000	1045800000	1154800000	945200000	1278400000	1148000000	869190000	965570000	957020000	668660000	972290000	753090000	680700000	1285400000	926410000	803910000	493260000	1040300000	818550000	695500000	890070000	1163600000	1213400000	1309800000	1125100000	1118300000	1354400000	1188800000	1016300000	1033400000	1091600000	1087200000	1124800000	1031100000	1096400000	1339700000	1075400000	1028600000	1075200000	1047100000	1129500000	1111600000
ANXA6	P08133	P08133	sp|P08133|ANXA6_HUMAN Annexin A6 OS=Homo sapiens OX=9606 GN=ANXA6 PE=1 SV=3	39	39	20666000000	1204900000	729010000	609750000	1017300000	898330000	1087300000	1181800000	921140000	1418500000	1143600000	674140000	1071400000	558530000	753900000	955380000	1087500000	1059500000	439390000	1056400000	1320400000	732420000	745210000	966960000	881730000	937230000	1095200000	1087300000	1165600000	1120100000	1147200000	1406300000	1196400000	1219000000	1087400000	1080500000	989860000	1058000000	1201300000	1169800000	1132000000	1111300000	1246600000	1209300000
HDGF	P51858	P51858	sp|P51858|HDGF_HUMAN Hepatoma-derived growth factor OS=Homo sapiens OX=9606 GN=HDGF PE=1 SV=1	15	15	20596000000	488120000	338480000	327130000	462090000	317760000	605650000	1723900000	1230100000	1506300000	1410400000	649170000	1395100000	876850000	938660000	833790000	1338200000	1268400000	502800000	984970000	1491100000	857900000	1049300000	692560000	611060000	624010000	631400000	609750000	1079500000	1477100000	1543000000	1576900000	1347600000	1001300000	1279500000	1241200000	1186200000	1131000000	1338300000	1315400000	1005100000	1283800000	1410700000	1283600000
SRSF6	Q13247	Q13247	sp|Q13247|SRSF6_HUMAN Serine/arginine-rich splicing factor 6 OS=Homo sapiens OX=9606 GN=SRSF6 PE=1 SV=2	8	12	20521000000	618960000	497280000	645530000	614250000	574550000	1162300000	1079600000	788930000	851540000	938300000	1330600000	994860000	1045200000	1192200000	1109500000	984900000	1079100000	953620000	1005500000	969310000	1076900000	1008300000	878710000	743020000	965090000	828280000	911810000	1306800000	1221200000	1174800000	1075700000	1166400000	1534400000	1246500000	1312100000	1365200000	1248300000	1137000000	1244000000	1563200000	1263900000	1181900000	1413300000
TXNDC5	Q8NBS9	Q8NBS9	sp|Q8NBS9|TXND5_HUMAN Thioredoxin domain-containing protein 5 OS=Homo sapiens OX=9606 GN=TXNDC5 PE=1 SV=2	17	17	20442000000	1409800000	1478500000	1126800000	1255700000	1125800000	981230000	1103100000	693970000	825930000	775600000	664070000	941290000	709060000	617470000	932370000	1029400000	678700000	649550000	1107600000	1039800000	595950000	699940000	1354900000	1733400000	1330400000	1235000000	1308200000	1126300000	1057800000	892770000	921610000	929010000	1140900000	985150000	957780000	1012900000	954130000	1040800000	878490000	1243900000	1081100000	1123800000	963950000
ARHGDIA	P52565	P52565	sp|P52565|GDIR1_HUMAN Rho GDP-dissociation inhibitor 1 OS=Homo sapiens OX=9606 GN=ARHGDIA PE=1 SV=3	9	9	20232000000	907140000	501010000	552430000	892390000	649520000	933120000	1311700000	1063500000	1158400000	1122700000	473710000	1192600000	830100000	757730000	877250000	1047000000	1180900000	584490000	1280500000	1130000000	780790000	1004700000	902950000	648280000	811050000	925530000	829440000	1109600000	1213300000	1253400000	1295800000	1228300000	871810000	1231100000	1193600000	1117400000	1091100000	1145300000	1354600000	1158000000	1234000000	1215900000	1254500000
PSMC1	P62191	P62191	sp|P62191|PRS4_HUMAN 26S proteasome regulatory subunit 4 OS=Homo sapiens OX=9606 GN=PSMC1 PE=1 SV=1	23	23	20227000000	1275900000	671780000	767010000	1089800000	910870000	1039200000	1199000000	778790000	1142100000	1033000000	664370000	1018100000	706590000	670300000	1107400000	1005000000	839180000	468020000	1249000000	1101100000	742360000	748190000	1226100000	883930000	1188900000	1114400000	1090600000	1190000000	1105200000	970260000	1161800000	1162600000	1081100000	1068600000	996200000	1049900000	1171000000	1138000000	1106400000	990690000	1221100000	1126100000	1066600000
FLNB	O75369	O75369	sp|O75369|FLNB_HUMAN Filamin-B OS=Homo sapiens OX=9606 GN=FLNB PE=1 SV=2	82	85	20210000000	2687400000	1671300000	1876400000	2522800000	1881400000	666730000	928100000	370710000	737600000	633520000	412930000	549920000	407860000	405720000	593600000	648980000	508370000	268380000	890160000	638100000	431450000	478110000	2033700000	1663000000	1911600000	1993200000	1865500000	856790000	803110000	719640000	847220000	799360000	869340000	770150000	809830000	813330000	789270000	836960000	736850000	766360000	828810000	809640000	819200000
PSMB5	P28074	P28074	sp|P28074|PSB5_HUMAN Proteasome subunit beta type-5 OS=Homo sapiens OX=9606 GN=PSMB5 PE=1 SV=3	12	12	20175000000	1110300000	816510000	970350000	1046400000	964480000	853200000	1230700000	915950000	1121400000	1009100000	624250000	1094800000	698220000	640860000	878750000	1108800000	854160000	589930000	1024300000	983080000	798940000	840710000	1187400000	989510000	1121400000	1158400000	1128300000	1010300000	1028900000	1146100000	1223500000	1235800000	1047800000	1170300000	999230000	996700000	967850000	1212600000	1001700000	1156000000	1056400000	1048200000	1166500000
CNN3	Q15417	Q15417	sp|Q15417|CNN3_HUMAN Calponin-3 OS=Homo sapiens OX=9606 GN=CNN3 PE=1 SV=1	15	15	20108000000	869290000	548710000	611900000	862630000	606920000	969240000	1199400000	1025900000	1075600000	1126700000	649670000	1269000000	860470000	794000000	973480000	1110500000	1027900000	533970000	1198100000	1099100000	859300000	836410000	853750000	902750000	937410000	983910000	1042400000	1076900000	1071300000	1040000000	1207700000	1258600000	1128300000	1085400000	1135600000	1101700000	1192600000	1227200000	1168200000	1144000000	1147100000	1274600000	1171000000
PTGES3	Q15185	Q15185	sp|Q15185|TEBP_HUMAN Prostaglandin E synthase 3 OS=Homo sapiens OX=9606 GN=PTGES3 PE=1 SV=1	9	9	20075000000	1160400000	853890000	893060000	1316000000	1091100000	942810000	1135900000	660660000	878980000	820380000	761720000	962690000	730330000	744190000	1078100000	921630000	1003500000	524520000	1169600000	905930000	708390000	811580000	1052900000	988990000	1029900000	1270000000	1084000000	1005000000	987480000	972500000	896740000	929390000	861550000	1273400000	993880000	1140800000	1054500000	1015400000	1181000000	856680000	1152400000	971250000	1096700000
ALDH2	P05091;O94788	P05091	sp|P05091|ALDH2_HUMAN Aldehyde dehydrogenase, mitochondrial OS=Homo sapiens OX=9606 GN=ALDH2 PE=1 SV=2	26	29	19974000000	282880000	345010000	160830000	286220000	198100000	1349800000	1559600000	864740000	981830000	1070700000	843600000	1295400000	1091200000	904740000	1336700000	1200700000	922740000	496750000	1558600000	1218500000	980850000	1024400000	476030000	543410000	277480000	423220000	353390000	1495600000	1353500000	1204100000	1153300000	1159300000	1446900000	1337300000	1336700000	1317400000	1435800000	1326200000	1094900000	1156000000	1399800000	1397000000	1296100000
CTNNB1	P35222	P35222	sp|P35222|CTNB1_HUMAN Catenin beta-1 OS=Homo sapiens OX=9606 GN=CTNNB1 PE=1 SV=1	25	29	19913000000	730880000	819100000	738520000	868110000	698260000	785810000	1417200000	1311000000	1550300000	1211600000	448860000	1304300000	899480000	539130000	619080000	985840000	1190600000	493480000	1059900000	900340000	663440000	677880000	991560000	962810000	963610000	939000000	817230000	902930000	1179600000	1507900000	1367800000	1368700000	909680000	1161200000	1178300000	1031500000	909850000	1125900000	1314300000	951500000	989610000	1136500000	1119400000
PSMA7	O14818;Q8TAA3	O14818	sp|O14818|PSA7_HUMAN Proteasome subunit alpha type-7 OS=Homo sapiens OX=9606 GN=PSMA7 PE=1 SV=1	16	16	19874000000	1342100000	806620000	999360000	1305700000	1123500000	809960000	1363800000	811890000	1295300000	941790000	472840000	877750000	533140000	515810000	1013000000	1117300000	702600000	319550000	1206100000	1118200000	547380000	650760000	1217500000	880630000	1153800000	1172800000	1104800000	966940000	1167200000	1256300000	1282800000	1151000000	793990000	1073400000	892510000	956310000	1005200000	1201300000	1015600000	850990000	1106400000	1130400000	924910000
SRRT	Q9BXP5	Q9BXP5	sp|Q9BXP5|SRRT_HUMAN Serrate RNA effector molecule homolog OS=Homo sapiens OX=9606 GN=SRRT PE=1 SV=1	27	27	19773000000	867390000	786430000	887740000	830390000	560570000	1149300000	1097200000	670780000	922480000	917720000	834340000	1093400000	912990000	804060000	978570000	977220000	925420000	509540000	1299400000	1064600000	838810000	844850000	897140000	828490000	959300000	773150000	880940000	1213000000	1048200000	1133400000	1120900000	1079300000	1136200000	1131500000	1213900000	1175800000	1140700000	1124600000	1231900000	1343600000	1194400000	1085400000	1161700000
PSMA1	P25786	P25786	sp|P25786|PSA1_HUMAN Proteasome subunit alpha type-1 OS=Homo sapiens OX=9606 GN=PSMA1 PE=1 SV=1	16	16	19720000000	987130000	727740000	793030000	1109200000	906470000	901270000	1257700000	914790000	988540000	1004900000	582740000	1094400000	769790000	643770000	853760000	1150400000	898490000	603610000	1052600000	1014500000	728660000	736800000	1016200000	1006100000	1008200000	1051200000	1018100000	1031700000	1101900000	1225400000	1103300000	1111900000	1015800000	1130600000	1122200000	1023500000	964060000	1295800000	1067300000	1057900000	1077200000	1120800000	1216700000
RPS21	P63220	P63220	sp|P63220|RS21_HUMAN 40S ribosomal protein S21 OS=Homo sapiens OX=9606 GN=RPS21 PE=1 SV=1	7	7	19719000000	1611400000	1161200000	1347900000	1531600000	1402900000	807290000	983970000	794340000	950800000	806830000	452490000	866180000	703290000	628410000	757170000	844400000	788860000	528150000	843840000	809080000	610970000	487960000	1501700000	1356900000	1580800000	1479700000	1470300000	941310000	893430000	1064800000	1017800000	946530000	824970000	1003100000	990810000	948870000	780340000	903020000	993800000	1088600000	830540000	902620000	928390000
HN1L	Q9H910	Q9H910	sp|Q9H910|JUPI2_HUMAN Jupiter microtubule associated homolog 2 OS=Homo sapiens OX=9606 GN=JPT2 PE=1 SV=1	12	12	19614000000	764440000	507540000	637740000	663470000	610690000	892750000	1267300000	1247900000	962600000	1036700000	566290000	1171900000	819020000	838580000	873050000	1118600000	1064100000	661100000	1050000000	1184800000	807800000	867230000	829460000	716940000	867390000	738690000	856510000	1099900000	1197400000	1203800000	1222400000	1241800000	1034200000	1258900000	1158900000	1179900000	1012300000	1214100000	1211600000	1142800000	1067200000	1272900000	1247400000
THRAP3	Q9Y2W1	Q9Y2W1	sp|Q9Y2W1|TR150_HUMAN Thyroid hormone receptor-associated protein 3 OS=Homo sapiens OX=9606 GN=THRAP3 PE=1 SV=2	25	26	19545000000	800240000	1040200000	776820000	918050000	790550000	955480000	1172000000	813380000	1122900000	977680000	600880000	954380000	761050000	731790000	1090600000	934690000	861580000	455030000	1188600000	1053300000	766040000	779720000	922540000	1199800000	967490000	857260000	950330000	1061400000	1103300000	1041200000	1080900000	1082200000	1085700000	1060600000	1136000000	1167800000	1069200000	1049200000	1083300000	1137100000	1148500000	1084600000	1127500000
SNRNP70	P08621	P08621	sp|P08621|RU17_HUMAN U1 small nuclear ribonucleoprotein 70 kDa OS=Homo sapiens OX=9606 GN=SNRNP70 PE=1 SV=2	18	18	19536000000	908810000	632940000	773320000	1032600000	737210000	884170000	1221000000	773170000	1039000000	1010200000	669510000	1082400000	788270000	833060000	856310000	985420000	905820000	507610000	1105600000	1018800000	816430000	954520000	1028300000	919380000	1004000000	976930000	925160000	1078800000	1149000000	1015900000	1193600000	1222800000	1055100000	1001900000	1092800000	1059400000	1066100000	1174400000	1076900000	1135900000	1135600000	1227400000	1127000000
SLC25A3	Q00325	Q00325	sp|Q00325|MPCP_HUMAN Phosphate carrier protein, mitochondrial OS=Homo sapiens OX=9606 GN=SLC25A3 PE=1 SV=2	14	14	19520000000	718580000	757820000	812000000	632430000	593380000	938700000	1216600000	982730000	934060000	869610000	753650000	1087600000	931480000	765310000	929920000	922360000	970630000	724080000	1043400000	1029200000	870190000	1036000000	739210000	957520000	918950000	700760000	782940000	1090800000	1125100000	1053000000	981020000	1171300000	1294300000	1145400000	1246500000	1161100000	1119700000	1134000000	1145500000	1390100000	980130000	1047500000	1249300000
PRPS1	P60891	P60891	sp|P60891|PRPS1_HUMAN Ribose-phosphate pyrophosphokinase 1 OS=Homo sapiens OX=9606 GN=PRPS1 PE=1 SV=2	8	16	19425000000	688730000	464810000	466840000	677030000	610670000	857520000	1440300000	1106300000	1466200000	1262100000	613940000	1094600000	754670000	609790000	921890000	1188500000	1029200000	469940000	1109600000	1110200000	695760000	786810000	705490000	629780000	607570000	738040000	702450000	1009000000	1175200000	1396000000	1426900000	1342600000	1103300000	1208200000	1121200000	924810000	996710000	1241300000	1206400000	1021300000	1124300000	1148000000	1168000000
H2AFV;H2AFZ	Q71UI9;P0C0S5	Q71UI9;P0C0S5	sp|Q71UI9|H2AV_HUMAN Histone H2A.V OS=Homo sapiens OX=9606 GN=H2AZ2 PE=1 SV=3;sp|P0C0S5|H2AZ_HUMAN Histone H2A.Z OS=Homo sapiens OX=9606 GN=H2AZ1 PE=1 SV=2	4	4	19385000000	901570000	1175700000	843430000	1126500000	786720000	937850000	1385700000	599460000	812620000	763160000	730040000	1190700000	568450000	585020000	1342500000	986770000	753550000	270700000	1313300000	773610000	665650000	871850000	901100000	1347700000	1032200000	1106900000	846390000	1144500000	1321400000	776360000	806610000	874870000	1065800000	1308700000	1027500000	799330000	1455400000	1106800000	965250000	728250000	1291900000	876240000	1016800000
PRMT1	Q99873;Q9NR22	Q99873	sp|Q99873|ANM1_HUMAN Protein arginine N-methyltransferase 1 OS=Homo sapiens OX=9606 GN=PRMT1 PE=1 SV=3	17	17	19245000000	1234900000	1004500000	956610000	1391300000	1301200000	927460000	1185000000	586580000	1008100000	801210000	581990000	805010000	557010000	555380000	987940000	830270000	727440000	320060000	1126600000	1033900000	604230000	718760000	1229800000	1229100000	1159400000	1399800000	1546000000	1049100000	1102600000	775960000	1003800000	964350000	818590000	864260000	843160000	893090000	1120600000	1002400000	881380000	650740000	1118400000	1079300000	935740000
TP53BP1	Q12888	Q12888	sp|Q12888|TP53B_HUMAN TP53-binding protein 1 OS=Homo sapiens OX=9606 GN=TP53BP1 PE=1 SV=2	58	58	19230000000	155680000	89643000	250580000	242490000	166670000	905210000	1412100000	1046800000	1407000000	1280900000	738570000	1077100000	975030000	883110000	957520000	1296200000	1177800000	515540000	1133500000	1291400000	1235000000	992620000	314490000	173060000	525410000	405430000	316190000	1166300000	1363800000	1340000000	1559100000	1415500000	1039700000	1272700000	1244400000	1228200000	1167100000	1372800000	1371600000	1131300000	1205100000	1348100000	1242500000
HUWE1	Q7Z6Z7	Q7Z6Z7	sp|Q7Z6Z7|HUWE1_HUMAN E3 ubiquitin-protein ligase HUWE1 OS=Homo sapiens OX=9606 GN=HUWE1 PE=1 SV=3	85	85	19141000000	709630000	422950000	472630000	696760000	550030000	1075500000	1348300000	881690000	1194000000	1036200000	625280000	1138900000	691560000	636220000	1130900000	1176100000	1008700000	530580000	1108200000	1131900000	789220000	785370000	813400000	672930000	773510000	791430000	748010000	1140600000	1155600000	1147600000	1199300000	1133400000	1134000000	1159100000	1122700000	1041400000	1133000000	1186700000	1086700000	1077300000	1142000000	1188000000	1152800000
NPEPPS	P55786;A6NEC2	P55786	sp|P55786|PSA_HUMAN Puromycin-sensitive aminopeptidase OS=Homo sapiens OX=9606 GN=NPEPPS PE=1 SV=2	38	38	19131000000	754570000	359960000	525630000	602050000	561440000	838490000	1442300000	1104200000	1084100000	1271700000	494160000	1129200000	930400000	598270000	936980000	1106400000	1062300000	473310000	1037600000	1103800000	840200000	874470000	854460000	569870000	769810000	727460000	749240000	1047200000	1231000000	1232600000	1335600000	1295000000	989530000	1087600000	1133000000	1011000000	1103800000	1201600000	1190900000	983750000	1107800000	1239500000	1123000000
GMPS	P49915	P49915	sp|P49915|GUAA_HUMAN GMP synthase [glutamine-hydrolyzing] OS=Homo sapiens OX=9606 GN=GMPS PE=1 SV=1	29	29	19106000000	1045700000	635750000	738210000	982240000	753280000	988800000	1137900000	819210000	925650000	1063800000	566110000	1119600000	602450000	587080000	1113900000	913790000	914700000	501330000	1235000000	1037600000	686070000	738080000	1064300000	842510000	993360000	978310000	1016400000	1086000000	990870000	980130000	931400000	1022500000	1112300000	1098500000	1087500000	1006400000	1172700000	961690000	1086400000	1065600000	1116200000	1030000000	1021600000
SARNP	P82979	P82979	sp|P82979|SARNP_HUMAN SAP domain-containing ribonucleoprotein OS=Homo sapiens OX=9606 GN=SARNP PE=1 SV=3	12	12	19064000000	842530000	730900000	863260000	813970000	837660000	883970000	1069900000	885410000	1044300000	1038800000	567350000	1008300000	781440000	756230000	841200000	1024100000	930310000	590460000	1018300000	1012700000	745480000	777080000	952480000	948040000	1050200000	935270000	1089500000	1032900000	1072000000	1218300000	1130000000	1235400000	940620000	1038800000	1096600000	1062300000	935880000	1083100000	1111000000	1140500000	983800000	1098600000	1099300000
UBA2	Q9UBT2	Q9UBT2	sp|Q9UBT2|SAE2_HUMAN SUMO-activating enzyme subunit 2 OS=Homo sapiens OX=9606 GN=UBA2 PE=1 SV=2	24	24	19047000000	667380000	428340000	462330000	517200000	395480000	974260000	1250700000	827660000	1107300000	970970000	714470000	1182400000	804240000	866450000	1064000000	1186000000	1061100000	604030000	1100900000	1264800000	709460000	887800000	690380000	560490000	633850000	634340000	612360000	1027500000	1185800000	1317700000	1190200000	1235500000	1026300000	1319400000	1146700000	1218100000	1001200000	1291100000	1257000000	1155600000	1098000000	1324700000	1034200000
RALY	Q9UKM9	Q9UKM9	sp|Q9UKM9|RALY_HUMAN RNA-binding protein Raly OS=Homo sapiens OX=9606 GN=RALY PE=1 SV=1	17	17	18987000000	465610000	598120000	552940000	432130000	393340000	1262800000	1075600000	1008700000	911970000	1013300000	692910000	1025500000	929530000	939080000	1126000000	928770000	1152500000	567950000	1073700000	984740000	810250000	1041400000	529790000	748430000	587040000	527860000	510070000	1270900000	1119600000	1320200000	1063500000	1154300000	1106900000	1137000000	1282300000	1321000000	1243800000	1100500000	1218200000	1280700000	1121200000	1107500000	1316000000
CAPRIN1	Q14444	Q14444	sp|Q14444|CAPR1_HUMAN Caprin-1 OS=Homo sapiens OX=9606 GN=CAPRIN1 PE=1 SV=2	13	13	18985000000	1383200000	964070000	1046000000	1243700000	1055500000	844630000	847250000	806000000	712800000	869830000	601610000	1017400000	704130000	759920000	620070000	851450000	789590000	571760000	851800000	835760000	825460000	783060000	1405700000	1152200000	1336900000	1261400000	1376700000	960720000	804240000	1070800000	961710000	982480000	1041700000	948100000	1059300000	1054300000	727670000	928110000	958640000	1231500000	807750000	951180000	1154000000
GLO1	Q04760	Q04760	sp|Q04760|LGUL_HUMAN Lactoylglutathione lyase OS=Homo sapiens OX=9606 GN=GLO1 PE=1 SV=4	12	12	18960000000	887610000	444230000	554000000	790590000	536980000	892950000	1459900000	1016100000	900160000	992830000	659130000	1098400000	693930000	672670000	936330000	1216000000	899090000	778720000	1055100000	1019300000	749270000	706910000	859250000	555270000	696840000	815970000	726870000	1024700000	1160900000	1296500000	1012300000	1164300000	1089900000	1159800000	1041000000	1038700000	1034600000	1294500000	1129400000	1414900000	1022800000	995940000	1163100000
CTNNA1	P35221	P35221	sp|P35221|CTNA1_HUMAN Catenin alpha-1 OS=Homo sapiens OX=9606 GN=CTNNA1 PE=1 SV=1	34	43	18885000000	1240600000	760750000	892220000	1091500000	894540000	734210000	1263600000	879690000	1241300000	1076400000	486800000	841230000	678060000	684820000	846420000	959590000	852790000	410500000	895680000	887080000	586940000	680350000	1127700000	1027500000	1137600000	1082800000	1011100000	951930000	1117200000	1215800000	1197400000	1094500000	970400000	933650000	951870000	1000300000	934440000	1036200000	991790000	924800000	980430000	895770000	923090000
DDX6	P26196	P26196	sp|P26196|DDX6_HUMAN Probable ATP-dependent RNA helicase DDX6 OS=Homo sapiens OX=9606 GN=DDX6 PE=1 SV=2	19	19	18805000000	926870000	639430000	680050000	948250000	706840000	888920000	1199700000	711370000	973870000	1049200000	566210000	959650000	772770000	692030000	1148300000	1060100000	888080000	452030000	1110400000	1059100000	577400000	794930000	894290000	847980000	879250000	909730000	845090000	1085200000	1126200000	1049900000	1029100000	1118900000	1036500000	1053800000	1091700000	1041600000	1110800000	1049700000	1087800000	882810000	1127800000	1089000000	1034000000
PSMA4	P25789	P25789	sp|P25789|PSA4_HUMAN Proteasome subunit alpha type-4 OS=Homo sapiens OX=9606 GN=PSMA4 PE=1 SV=1	15	15	18728000000	1008400000	740600000	854290000	1090200000	908420000	853930000	1298100000	782720000	1043200000	864710000	512400000	969180000	663470000	672150000	708030000	968230000	930660000	520870000	1025900000	969610000	724540000	618020000	965490000	881180000	1003200000	1026900000	1044600000	938630000	1016400000	1016500000	998050000	1059100000	1028500000	949560000	909190000	987590000	754640000	1012400000	1168400000	1016300000	932000000	989120000	1004000000
RPL19	P84098	P84098	sp|P84098|RL19_HUMAN 60S ribosomal protein L19 OS=Homo sapiens OX=9606 GN=RPL19 PE=1 SV=1	14	14	18727000000	2122100000	1412100000	2306800000	2033300000	2044500000	414050000	641720000	431600000	387100000	403900000	395290000	922690000	471510000	562000000	609740000	388550000	629240000	342790000	662260000	516420000	554950000	474080000	1871900000	1475000000	2196700000	1992100000	2382600000	506150000	594270000	517700000	525330000	628230000	1072300000	818600000	731720000	769140000	707110000	485170000	716340000	755420000	804980000	587020000	782210000
AASS	Q9UDR5	Q9UDR5	sp|Q9UDR5|AASS_HUMAN Alpha-aminoadipic semialdehyde synthase, mitochondrial OS=Homo sapiens OX=9606 GN=AASS PE=1 SV=1	45	45	18723000000	3169800000	3417000000	2194000000	3472500000	2260100000	276510000	327100000	197160000	199830000	166120000	188620000	270930000	180920000	206860000	447340000	354630000	175510000	114790000	414870000	263000000	159640000	265530000	3162100000	3675400000	2197500000	3449400000	2250400000	452800000	321620000	387980000	312380000	318780000	450490000	356670000	415480000	442310000	486100000	414950000	312710000	200950000	450240000	362650000	381580000
PPP1CA	P62136	P62136	sp|P62136|PP1A_HUMAN Serine/threonine-protein phosphatase PP1-alpha catalytic subunit OS=Homo sapiens OX=9606 GN=PPP1CA PE=1 SV=1	6	19	18712000000	923710000	745940000	834420000	910390000	801270000	973270000	1276700000	747760000	1045800000	945980000	548390000	1034600000	587820000	619230000	1013500000	1052000000	788740000	401930000	1114300000	1003800000	603930000	738660000	930620000	926120000	1088000000	923890000	973150000	1073700000	1077600000	890720000	1093800000	1041600000	1044200000	1050200000	869490000	967180000	1029200000	1066800000	1004300000	883160000	1061800000	996350000	1037900000
STRAP	Q9Y3F4	Q9Y3F4	sp|Q9Y3F4|STRAP_HUMAN Serine-threonine kinase receptor-associated protein OS=Homo sapiens OX=9606 GN=STRAP PE=1 SV=1	23	23	18709000000	1254100000	690510000	863290000	1127800000	922050000	885780000	1074500000	846500000	963700000	799210000	561780000	950820000	652500000	634090000	1010700000	749120000	815740000	449750000	1170300000	869240000	587670000	830340000	1068200000	916020000	975450000	1074000000	1043500000	1011400000	980630000	1036200000	998530000	917970000	1017400000	985350000	1040600000	1019600000	1023400000	948750000	1042400000	965420000	1062000000	800050000	1065500000
KPNA2	P52292	P52292	sp|P52292|IMA1_HUMAN Importin subunit alpha-1 OS=Homo sapiens OX=9606 GN=KPNA2 PE=1 SV=1	19	19	18683000000	2698100000	1769100000	2017700000	2445000000	1861000000	586830000	479370000	363350000	397820000	422890000	347940000	505500000	435090000	499460000	730090000	401320000	432400000	355910000	597300000	411990000	478460000	446730000	2445600000	1874900000	2158600000	2212100000	2161700000	733090000	522860000	563670000	459680000	560120000	766830000	517910000	710780000	797010000	802240000	517530000	610990000	723410000	652080000	562550000	744390000
RPL22	P35268	P35268	sp|P35268|RL22_HUMAN 60S ribosomal protein L22 OS=Homo sapiens OX=9606 GN=RPL22 PE=1 SV=2	8	9	18625000000	1762900000	979600000	1341700000	1777700000	1448000000	606620000	812070000	775420000	737760000	695300000	544160000	861860000	502390000	571440000	528260000	874140000	597550000	443230000	893320000	663580000	642040000	566230000	1542200000	1107100000	1325600000	1574100000	1572600000	838530000	798100000	1141200000	762710000	970110000	917440000	1038900000	900140000	875690000	730740000	867740000	975690000	1049700000	763940000	661180000	992940000
ENAH	Q8N8S7	Q8N8S7	sp|Q8N8S7|ENAH_HUMAN Protein enabled homolog OS=Homo sapiens OX=9606 GN=ENAH PE=1 SV=2	25	26	18625000000	1103900000	767720000	867310000	1077900000	930040000	719850000	1102400000	729850000	1093800000	878510000	647920000	995740000	732760000	722240000	729170000	812960000	969330000	475070000	939870000	1039600000	617850000	670980000	1091400000	978570000	1075800000	1063500000	1117000000	853440000	984450000	924550000	1182100000	1066000000	988540000	951400000	1049200000	1018800000	965140000	936780000	1096600000	999220000	961820000	1179300000	1038400000
MDK	P21741	P21741	sp|P21741|MK_HUMAN Midkine OS=Homo sapiens OX=9606 GN=MDK PE=1 SV=1	8	8	18615000000	14446000	44971000	15328000	15298000	24777000	1629300000	1495400000	675260000	903740000	951920000	1029800000	1330800000	776070000	978900000	2020400000	1130300000	872700000	663900000	1418700000	885780000	862960000	874020000	0	69568000	0	0	40844000	2281800000	1632800000	762860000	1142600000	1236600000	1312700000	1593000000	895540000	1474600000	2574700000	1415000000	845200000	944430000	1576000000	1112300000	1066300000
PSMC3	P17980	P17980	sp|P17980|PRS6A_HUMAN 26S proteasome regulatory subunit 6A OS=Homo sapiens OX=9606 GN=PSMC3 PE=1 SV=3	25	25	18505000000	838340000	570990000	655620000	826110000	718560000	1050800000	973560000	738700000	1119500000	813580000	819820000	727590000	764700000	805330000	832020000	888050000	875840000	582420000	1078500000	1065700000	839240000	919850000	928130000	898270000	919500000	947850000	997710000	1118700000	1057700000	1011600000	1093400000	992590000	1036100000	967970000	1073900000	1073600000	1036300000	1024300000	984710000	965660000	1169900000	1071100000	1146200000
SMC3	Q9UQE7	Q9UQE7	sp|Q9UQE7|SMC3_HUMAN Structural maintenance of chromosomes protein 3 OS=Homo sapiens OX=9606 GN=SMC3 PE=1 SV=2	47	47	18437000000	828810000	761070000	592940000	856490000	661310000	969760000	1208100000	742290000	1079900000	1018600000	552370000	777580000	620660000	651580000	955260000	961400000	954930000	496710000	1033500000	1210400000	616380000	887430000	873140000	980770000	856460000	810290000	880440000	1104800000	1037900000	992080000	1046200000	1018000000	1086400000	962690000	1015300000	993470000	1039000000	979200000	1006100000	1106500000	1085200000	1022900000	1078500000
PAFAH1B3	Q15102	Q15102	sp|Q15102|PA1B3_HUMAN Platelet-activating factor acetylhydrolase IB subunit alpha1 OS=Homo sapiens OX=9606 GN=PAFAH1B3 PE=1 SV=1	10	10	18433000000	347700000	215740000	302700000	335060000	338440000	1058800000	1164800000	1053700000	1035700000	997750000	814860000	1173100000	879020000	901030000	1146100000	996700000	909660000	771090000	1158500000	1090400000	856720000	885760000	382980000	287160000	398640000	374500000	430360000	1236800000	1103000000	1307100000	1189200000	1138400000	1449700000	1286800000	1280500000	1237300000	1250200000	1108500000	1213200000	1438400000	1183200000	1209400000	1288000000
SMC1A	Q14683	Q14683	sp|Q14683|SMC1A_HUMAN Structural maintenance of chromosomes protein 1A OS=Homo sapiens OX=9606 GN=SMC1A PE=1 SV=2	54	54	18404000000	684510000	757910000	614080000	754370000	576990000	1077100000	1184300000	897110000	1004500000	1011800000	632420000	1088100000	639180000	589340000	864690000	1090300000	893210000	497260000	1187600000	891700000	694390000	773500000	816260000	936900000	718730000	816530000	710810000	1085400000	953980000	996110000	995060000	1055100000	1046400000	1004800000	1075600000	1004200000	972100000	993370000	1071300000	1091700000	1082300000	909790000	1115900000
HSD17B4	P51659	P51659	sp|P51659|DHB4_HUMAN Peroxisomal multifunctional enzyme type 2 OS=Homo sapiens OX=9606 GN=HSD17B4 PE=1 SV=3	31	31	18383000000	1778100000	2026800000	1256200000	1680600000	1249400000	766230000	705170000	662200000	877890000	653850000	386470000	660760000	524160000	425480000	768820000	777280000	640260000	261490000	709570000	645500000	482410000	443940000	1483600000	1929100000	1273500000	1400000000	1392000000	872700000	812040000	903670000	797150000	870980000	796630000	843130000	777140000	786520000	861880000	812180000	839400000	796770000	793360000	707660000	808670000
UBE2N	P61088;Q5JXB2	P61088	sp|P61088|UBE2N_HUMAN Ubiquitin-conjugating enzyme E2 N OS=Homo sapiens OX=9606 GN=UBE2N PE=1 SV=1	13	13	18321000000	1012500000	743180000	823500000	1049700000	917770000	897370000	1128900000	845720000	886570000	905770000	575090000	948730000	645840000	585240000	836310000	1013900000	824760000	487140000	899220000	958470000	659080000	676600000	1146600000	917540000	1098900000	1276800000	1202600000	1005400000	1117300000	809620000	1092500000	996660000	890940000	1014200000	740350000	831500000	945760000	1279700000	896060000	824590000	1111500000	1061700000	894150000
GLG1	Q92896	Q92896	sp|Q92896|GSLG1_HUMAN Golgi apparatus protein 1 OS=Homo sapiens OX=9606 GN=GLG1 PE=1 SV=2	40	40	18288000000	1216000000	1139000000	896860000	1177100000	841760000	1020900000	961980000	670590000	807180000	763690000	584550000	910640000	632500000	587300000	769560000	746810000	822480000	465150000	947390000	987820000	628620000	710430000	1097300000	1282600000	1028400000	1060600000	981710000	1055500000	921550000	853320000	913600000	906450000	1054500000	1018600000	914460000	954010000	884960000	914880000	1010700000	1039400000	948410000	980440000	944930000
RPL30	P62888	P62888	sp|P62888|RL30_HUMAN 60S ribosomal protein L30 OS=Homo sapiens OX=9606 GN=RPL30 PE=1 SV=2	8	8	18206000000	1704800000	1176200000	1334800000	1624700000	1343100000	766210000	861660000	530120000	689610000	613080000	594380000	842090000	508490000	431610000	766670000	785320000	596810000	392770000	879090000	786140000	479410000	499080000	1668900000	1358200000	1461300000	1526700000	1453600000	947220000	789900000	746150000	722630000	759290000	958520000	964700000	738140000	667410000	887610000	937650000	693880000	794770000	857980000	853870000	763350000
LDHA	P00338;Q6ZMR3;P07864	P00338	sp|P00338|LDHA_HUMAN L-lactate dehydrogenase A chain OS=Homo sapiens OX=9606 GN=LDHA PE=1 SV=2	20	20	18203000000	3883300000	2334900000	2714700000	4207500000	3279900000	40541000	243410000	130710000	146810000	61359000	30336000	112950000	82369000	67145000	121410000	142600000	106460000	38864000	147870000	153380000	79700000	77012000	3810800000	2480300000	3105700000	4106500000	4080200000	93085000	233110000	163270000	174710000	135350000	58246000	164730000	142120000	143650000	155140000	201560000	168260000	120610000	174920000	164300000	155260000
RCN1	Q15293	Q15293	sp|Q15293|RCN1_HUMAN Reticulocalbin-1 OS=Homo sapiens OX=9606 GN=RCN1 PE=1 SV=1	13	13	18200000000	273200000	389450000	221720000	268260000	154760000	967730000	1532200000	951750000	1347100000	1115600000	545990000	1019700000	884200000	792670000	1090100000	1083200000	1059800000	526150000	1241000000	1151400000	751550000	832780000	396830000	520390000	345620000	375710000	320920000	1083400000	1349900000	1143700000	1330900000	1233200000	1083100000	1069000000	1158400000	1147500000	1112500000	1160900000	1273300000	1027100000	1202800000	1204200000	1150900000
MSH2	P43246	P43246	sp|P43246|MSH2_HUMAN DNA mismatch repair protein Msh2 OS=Homo sapiens OX=9606 GN=MSH2 PE=1 SV=1	35	35	18158000000	1247800000	746150000	1018000000	1227400000	1013500000	925340000	1034500000	678970000	717630000	721810000	600130000	981690000	635760000	515290000	957380000	735030000	762770000	446470000	1028000000	921500000	558430000	684750000	1094100000	950570000	1147600000	1092900000	1116200000	1092700000	958300000	797130000	877680000	866220000	1073900000	978610000	917710000	927800000	1099500000	921450000	911970000	974250000	957580000	1027200000	1003800000
MAP2	P11137	P11137	sp|P11137|MTAP2_HUMAN Microtubule-associated protein 2 OS=Homo sapiens OX=9606 GN=MAP2 PE=1 SV=4	46	46	18141000000	32348000	40488000	18681000	50224000	40904000	961400000	1474200000	1046500000	1532700000	1182100000	677350000	1058000000	979800000	955620000	1101400000	1101700000	1242500000	565740000	1230600000	1239200000	787270000	822310000	71716000	85431000	0	38320000	0	863370000	1740600000	1493800000	1525400000	1576300000	925710000	1392200000	1104100000	1655600000	944120000	1275200000	1412800000	1389100000	936250000	1350500000	1070500000
RPL27	P61353	P61353	sp|P61353|RL27_HUMAN 60S ribosomal protein L27 OS=Homo sapiens OX=9606 GN=RPL27 PE=1 SV=2	9	9	18098000000	2475300000	1755500000	1726100000	2455500000	1974200000	446870000	614580000	369660000	443420000	349200000	417370000	779490000	292160000	310120000	514390000	434990000	466860000	149120000	825950000	633340000	326630000	337270000	2226000000	1825200000	1865200000	2057300000	2077200000	551590000	610940000	562130000	570150000	490360000	752100000	873580000	498150000	616270000	671700000	565860000	686970000	479100000	789000000	715610000	716070000
MSH6	P52701	P52701	sp|P52701|MSH6_HUMAN DNA mismatch repair protein Msh6 OS=Homo sapiens OX=9606 GN=MSH6 PE=1 SV=2	43	43	18076000000	1074000000	769860000	755780000	1067100000	1052000000	1115900000	901810000	596320000	624860000	722780000	655120000	877800000	750690000	646580000	1043600000	784320000	736470000	497680000	1048000000	807280000	723260000	824390000	1017900000	1002900000	1021200000	1013000000	1062400000	1147000000	990100000	872270000	890300000	876570000	1059600000	1054800000	1001500000	963880000	1101600000	932620000	906180000	881180000	1032900000	950490000	1033100000
ATP5O	P48047	P48047	sp|P48047|ATPO_HUMAN ATP synthase subunit O, mitochondrial OS=Homo sapiens OX=9606 GN=ATP5PO PE=1 SV=1	9	9	18064000000	750920000	1104700000	681560000	672010000	659710000	1013100000	1121300000	728810000	775910000	766640000	650680000	801340000	764650000	761500000	924630000	979110000	801970000	591420000	1072700000	918260000	742880000	779960000	885480000	1368100000	899910000	833460000	877350000	1199400000	1033500000	926120000	913660000	924890000	939920000	846340000	1100400000	1042000000	1003900000	1064000000	988490000	939010000	1107300000	921580000	1116900000
ACP1	P24666	P24666	sp|P24666|PPAC_HUMAN Low molecular weight phosphotyrosine protein phosphatase OS=Homo sapiens OX=9606 GN=ACP1 PE=1 SV=3	10	10	18022000000	462300000	266480000	356560000	438730000	395160000	1096800000	1052900000	952330000	988770000	1090600000	599050000	938150000	805260000	825720000	1134800000	1043300000	1088600000	489760000	1283200000	935900000	796270000	981450000	521190000	380870000	504520000	538290000	598820000	1041400000	1032700000	1146800000	1050600000	1105300000	915910000	1090900000	1192000000	1151000000	1089400000	1037600000	1242600000	1049000000	1151700000	1011000000	1115500000
RPL23	P62829	P62829	sp|P62829|RL23_HUMAN 60S ribosomal protein L23 OS=Homo sapiens OX=9606 GN=RPL23 PE=1 SV=1	11	11	18005000000	1769400000	1200500000	1470200000	1563100000	1491900000	871530000	884080000	439810000	564710000	582080000	405480000	812620000	489050000	479660000	851150000	804170000	579690000	285900000	744620000	649040000	512590000	553610000	1724700000	1446400000	1769300000	1516700000	1776400000	926250000	814730000	677600000	618680000	688010000	814100000	872350000	746520000	785780000	859760000	925270000	705780000	637030000	766450000	724000000	733600000
SUB1	P53999	P53999	sp|P53999|TCP4_HUMAN Activated RNA polymerase II transcriptional coactivator p15 OS=Homo sapiens OX=9606 GN=SUB1 PE=1 SV=3	10	10	17824000000	779890000	527230000	578150000	732280000	663490000	705080000	1011700000	687590000	926810000	787070000	592260000	904560000	775420000	847230000	1018000000	1009000000	901100000	591330000	1207700000	1001000000	768940000	807890000	1051900000	844540000	1014700000	998160000	1082600000	900580000	914680000	854180000	953050000	931690000	878420000	916900000	1034900000	1022500000	1130700000	1049100000	1024600000	797580000	1154200000	1186100000	968130000
DPYSL4	O14531	O14531	sp|O14531|DPYL4_HUMAN Dihydropyrimidinase-related protein 4 OS=Homo sapiens OX=9606 GN=DPYSL4 PE=1 SV=2	22	22	17762000000	26115000	25271000	21030000	42132000	21130000	954860000	1263700000	1375100000	1333600000	1274900000	585790000	1343100000	904090000	724490000	965350000	1166800000	1141000000	582690000	1167600000	1056300000	815460000	971560000	0	0	0	63042000	0	1012600000	1076300000	1770900000	1276100000	1498800000	969600000	1423000000	1063800000	1102000000	977560000	1311900000	1194600000	1072800000	1248600000	1065600000	1122400000
TPT1	P13693;Q56UQ5	P13693	sp|P13693|TCTP_HUMAN Translationally-controlled tumor protein OS=Homo sapiens OX=9606 GN=TPT1 PE=1 SV=1	8	8	17707000000	922300000	637490000	762710000	915790000	809530000	914850000	1017800000	759470000	803530000	807110000	624080000	1019400000	726730000	648580000	820620000	876890000	896910000	341120000	1022200000	850680000	824440000	704990000	869830000	761220000	943410000	929020000	934040000	1000600000	969970000	997480000	871830000	915790000	877140000	1062400000	996130000	943190000	918120000	985000000	953700000	778900000	1050700000	891960000	1080900000
PFAS	O15067	O15067	sp|O15067|PUR4_HUMAN Phosphoribosylformylglycinamidine synthase OS=Homo sapiens OX=9606 GN=PFAS PE=1 SV=4	37	37	17595000000	1326500000	846670000	1051900000	1367300000	1087000000	805690000	798750000	715250000	781100000	790510000	413220000	808030000	664750000	541690000	715780000	681770000	794520000	485310000	893380000	816940000	527180000	681520000	1279300000	1040000000	1303800000	1350500000	1348900000	886630000	844690000	895650000	849580000	852990000	835870000	811150000	907250000	875050000	809450000	814080000	951380000	887970000	899090000	835770000	886360000
NUP93	Q8N1F7	Q8N1F7	sp|Q8N1F7|NUP93_HUMAN Nuclear pore complex protein Nup93 OS=Homo sapiens OX=9606 GN=NUP93 PE=1 SV=2	41	41	17482000000	1187900000	1094300000	940340000	1122600000	749670000	1020500000	1011300000	535300000	681850000	612130000	540080000	862440000	514260000	631510000	908340000	756840000	695410000	404000000	1037900000	810200000	603340000	761950000	1167200000	1243400000	1052600000	985330000	987460000	977900000	861490000	826440000	770340000	840970000	1061800000	880310000	844140000	922190000	966810000	902980000	821270000	995520000	940050000	844790000	1019800000
HNRNPDL	O14979	O14979	sp|O14979|HNRDL_HUMAN Heterogeneous nuclear ribonucleoprotein D-like OS=Homo sapiens OX=9606 GN=HNRNPDL PE=1 SV=3	17	17	17455000000	484890000	401280000	365310000	488170000	279140000	789250000	827780000	1351300000	702920000	969350000	496790000	1377200000	1147200000	843240000	723270000	796650000	1124400000	850400000	1047500000	782620000	751440000	854500000	693860000	774670000	605440000	750910000	584700000	1134000000	973350000	1159800000	1050900000	1031700000	865210000	1169800000	1122400000	1015000000	1093700000	1089300000	1153800000	784920000	1321700000	1092900000	1001600000
RPS16	P62249	P62249	sp|P62249|RS16_HUMAN 40S ribosomal protein S16 OS=Homo sapiens OX=9606 GN=RPS16 PE=1 SV=2	16	16	17354000000	1495800000	1121400000	1188200000	1504400000	1577800000	749470000	899370000	434650000	542790000	511790000	589790000	649010000	454780000	560130000	1146900000	592640000	493110000	372570000	851050000	596180000	471610000	550880000	1438300000	1311300000	1398200000	1488300000	1767300000	840820000	859150000	602480000	599400000	620310000	914210000	771430000	683210000	809820000	1131300000	717570000	599650000	844450000	959160000	644370000	734990000
PSMB6	P28072	P28072	sp|P28072|PSB6_HUMAN Proteasome subunit beta type-6 OS=Homo sapiens OX=9606 GN=PSMB6 PE=1 SV=4	6	6	17327000000	889100000	678910000	672880000	818800000	651300000	790260000	996740000	871990000	821350000	899200000	573180000	940150000	721610000	845640000	738680000	860720000	795420000	528760000	982040000	931100000	644260000	674950000	894990000	883500000	854790000	829480000	849170000	953760000	928040000	1168200000	963640000	1006200000	935180000	949100000	970800000	1107700000	845290000	1154400000	995330000	1049000000	946510000	1029400000	1011600000
PDCD6IP	Q8WUM4	Q8WUM4	sp|Q8WUM4|PDC6I_HUMAN Programmed cell death 6-interacting protein OS=Homo sapiens OX=9606 GN=PDCD6IP PE=1 SV=1	42	42	17318000000	739530000	402040000	542140000	670830000	669490000	916460000	1178000000	813300000	1082500000	940730000	592890000	936810000	725170000	633280000	941450000	909710000	874470000	497180000	864340000	972250000	667250000	747870000	804920000	621220000	718480000	818180000	814210000	992480000	992920000	1032000000	1029000000	1015500000	1014400000	928030000	1056800000	1092800000	951550000	992340000	1031600000	1049800000	942730000	1043700000	1035000000
RPA1	P27694	P27694	sp|P27694|RFA1_HUMAN Replication protein A 70 kDa DNA-binding subunit OS=Homo sapiens OX=9606 GN=RPA1 PE=1 SV=2	27	27	17314000000	632430000	357970000	427390000	548390000	509040000	1013200000	1208800000	771290000	1059500000	909550000	564240000	1162900000	607810000	666210000	1015200000	1045900000	784850000	488450000	1155300000	977810000	616910000	790450000	669620000	528450000	647660000	621970000	729110000	1120700000	1061600000	939690000	1034400000	992750000	1066300000	1119000000	934960000	1013300000	1099200000	1051200000	964130000	1075200000	1027700000	1053900000	1089100000
USP5	P45974	P45974	sp|P45974|UBP5_HUMAN Ubiquitin carboxyl-terminal hydrolase 5 OS=Homo sapiens OX=9606 GN=USP5 PE=1 SV=2	25	26	17132000000	546550000	254300000	400470000	552850000	432890000	818160000	1045500000	920880000	1012600000	889750000	588200000	1087300000	624230000	707740000	867850000	1141200000	897450000	371460000	1204700000	1192500000	697040000	878390000	582350000	506400000	550640000	575360000	638870000	1032600000	963350000	1038400000	1043300000	1025200000	1112900000	1017000000	1095400000	1041200000	1035700000	1004600000	1011400000	1055200000	1122100000	1099200000	1090000000
RPL31	P62899	P62899	sp|P62899|RL31_HUMAN 60S ribosomal protein L31 OS=Homo sapiens OX=9606 GN=RPL31 PE=1 SV=1	8	8	17119000000	1862600000	1280000000	1535500000	1699200000	1575300000	618020000	673940000	559850000	514620000	596570000	396570000	780630000	482710000	434860000	662190000	654050000	476050000	215730000	570340000	642830000	423880000	464030000	1689200000	1325200000	1670100000	1564400000	1559700000	848250000	649560000	748420000	599430000	696410000	767340000	932870000	764300000	737270000	743840000	772810000	639490000	727180000	591940000	763090000	762890000
COTL1	Q14019	Q14019	sp|Q14019|COTL1_HUMAN Coactosin-like protein OS=Homo sapiens OX=9606 GN=COTL1 PE=1 SV=3	13	13	17087000000	573180000	201100000	307520000	619670000	385700000	867980000	1086500000	1437700000	1176300000	1246900000	482710000	746570000	854950000	704810000	734990000	802670000	1223300000	525300000	798720000	751440000	700540000	858440000	594090000	336410000	511670000	674520000	498380000	992180000	1062100000	1424100000	1608100000	1383300000	858820000	842020000	1122800000	964160000	807270000	956410000	1471900000	935290000	838450000	866640000	990590000
OLA1	Q9NTK5	Q9NTK5	sp|Q9NTK5|OLA1_HUMAN Obg-like ATPase 1 OS=Homo sapiens OX=9606 GN=OLA1 PE=1 SV=2	18	18	17068000000	655420000	422750000	471590000	695750000	596420000	837580000	1175100000	684420000	1045000000	825320000	602710000	957910000	745790000	617370000	1132500000	1042000000	833030000	513200000	996860000	873340000	604820000	739120000	580960000	488000000	596250000	643720000	662640000	1150800000	1063500000	905760000	1087700000	965870000	1072900000	948520000	969790000	999390000	1177000000	1118900000	1007500000	939720000	1097800000	1124200000	975700000
NSFL1C	Q9UNZ2	Q9UNZ2	sp|Q9UNZ2|NSF1C_HUMAN NSFL1 cofactor p47 OS=Homo sapiens OX=9606 GN=NSFL1C PE=1 SV=2	20	20	17046000000	612670000	338000000	504340000	532640000	491390000	820630000	1132200000	908700000	1072000000	946450000	547060000	1054300000	761030000	588620000	776120000	1147800000	916050000	413890000	1039700000	1059400000	685010000	698390000	648030000	530350000	662110000	581090000	678610000	962880000	993140000	1117700000	1110400000	1093600000	953090000	1066800000	1066700000	976550000	855630000	1138200000	1103900000	995620000	981840000	1054800000	1052500000
PSMA5	P28066	P28066	sp|P28066|PSA5_HUMAN Proteasome subunit alpha type-5 OS=Homo sapiens OX=9606 GN=PSMA5 PE=1 SV=3	10	10	17010000000	1049400000	763060000	818570000	1066800000	902700000	650580000	1040600000	752510000	866800000	847860000	450390000	797240000	689710000	580200000	762610000	887280000	701590000	427120000	946390000	878330000	563750000	566720000	1037100000	907150000	963620000	1071800000	994930000	747620000	978020000	960880000	915530000	996620000	781580000	881510000	975550000	879280000	827430000	972110000	893160000	828480000	933880000	922770000	875270000
BSG	P35613	P35613	sp|P35613|BASI_HUMAN Basigin OS=Homo sapiens OX=9606 GN=BSG PE=1 SV=2	9	9	16999000000	1591700000	1193000000	1127000000	1558800000	1232300000	548800000	749280000	486610000	621280000	676400000	363290000	829460000	521980000	447000000	754240000	760660000	575400000	334530000	778890000	805880000	463480000	578590000	1546800000	1443500000	1250900000	1531000000	1324500000	793270000	862900000	675590000	690010000	773140000	591950000	897860000	754770000	684380000	779640000	849700000	676900000	716710000	820940000	886720000	699800000
SSBP1	Q04837	Q04837	sp|Q04837|SSBP_HUMAN Single-stranded DNA-binding protein, mitochondrial OS=Homo sapiens OX=9606 GN=SSBP1 PE=1 SV=1	10	10	16894000000	1058000000	969790000	650260000	1038900000	644480000	700270000	767480000	759160000	677440000	882720000	567170000	1001200000	660160000	608040000	902540000	744930000	669830000	523920000	1015400000	805610000	599690000	646950000	929830000	1243400000	860240000	882080000	895810000	868130000	769140000	801890000	799360000	807560000	978960000	822180000	937360000	936750000	853070000	854350000	845540000	1114800000	1045100000	889680000	960410000
HSD17B10	Q99714	Q99714	sp|Q99714|HCD2_HUMAN 3-hydroxyacyl-CoA dehydrogenase type-2 OS=Homo sapiens OX=9606 GN=HSD17B10 PE=1 SV=3	16	16	16840000000	631740000	749500000	431090000	661430000	418140000	915450000	1176700000	675790000	772160000	802310000	641720000	1026500000	723130000	680940000	964140000	914730000	748770000	441230000	1280000000	817840000	638060000	728950000	662500000	920250000	643940000	672720000	570580000	1100200000	1017300000	908030000	827210000	910220000	1082500000	1021700000	988530000	950270000	1058300000	1006900000	946300000	934230000	1181200000	875810000	997720000
RPS19	P39019	P39019	sp|P39019|RS19_HUMAN 40S ribosomal protein S19 OS=Homo sapiens OX=9606 GN=RPS19 PE=1 SV=2	10	10	16799000000	1806100000	1040100000	1220100000	1675900000	1339800000	518370000	892240000	615320000	552270000	568110000	432930000	760490000	465980000	524510000	736840000	604210000	545180000	284950000	802410000	506160000	439450000	467670000	1725900000	1125600000	1441500000	1807400000	1579500000	693330000	831100000	846080000	696890000	770150000	659550000	778180000	654780000	732150000	827220000	683280000	610390000	573560000	799310000	620300000	633520000
BUB3	O43684	O43684	sp|O43684|BUB3_HUMAN Mitotic checkpoint protein BUB3 OS=Homo sapiens OX=9606 GN=BUB3 PE=1 SV=1	11	11	16773000000	761240000	535780000	692710000	784020000	605710000	861220000	1070400000	748960000	914560000	851610000	646040000	864410000	667300000	694040000	787450000	877940000	811760000	545290000	853820000	867570000	718420000	612990000	876450000	777950000	950080000	856290000	844710000	972120000	935240000	917750000	960880000	926720000	998640000	858300000	955210000	951790000	945450000	932430000	964430000	1015000000	946810000	889480000	1005400000
RPL29	P47914	P47914	sp|P47914|RL29_HUMAN 60S ribosomal protein L29 OS=Homo sapiens OX=9606 GN=RPL29 PE=1 SV=2	5	5	16674000000	1790100000	1244500000	1855200000	1482700000	1428000000	519450000	559030000	489080000	367370000	425380000	631940000	810380000	483380000	448840000	514190000	397390000	713140000	338610000	661040000	396130000	574130000	543690000	1845100000	1296700000	2068100000	1395600000	1529100000	606830000	558900000	552280000	376670000	566290000	1068100000	910770000	800510000	893330000	525090000	431840000	976850000	728980000	728790000	519320000	970220000
PSMA6	P60900	P60900	sp|P60900|PSA6_HUMAN Proteasome subunit alpha type-6 OS=Homo sapiens OX=9606 GN=PSMA6 PE=1 SV=1	16	16	16537000000	944190000	739240000	666450000	828450000	722930000	722310000	1203500000	854180000	1031500000	777060000	456330000	832020000	544100000	516330000	676880000	890530000	711510000	527850000	945910000	784360000	565770000	595600000	994390000	890140000	918220000	895500000	1009700000	872340000	1054500000	931230000	1092600000	937180000	721810000	861970000	841070000	814740000	789430000	990380000	872250000	823960000	883890000	853320000	883030000
SNRPN;SNRPB	P63162;P14678	P63162;P14678	sp|P63162|RSMN_HUMAN Small nuclear ribonucleoprotein-associated protein N OS=Homo sapiens OX=9606 GN=SNRPN PE=1 SV=1;sp|P14678|RSMB_HUMAN Small nuclear ribonucleoprotein-associated proteins B and B OS=Homo sapiens OX=9606 GN=SNRPB PE=1 SV=2	8	8	16428000000	641200000	595300000	518140000	735810000	577570000	776420000	1081500000	851600000	825680000	772560000	573500000	1043600000	648250000	591330000	880170000	955190000	758800000	536820000	973080000	904810000	621640000	565210000	644020000	810120000	687500000	739490000	666140000	870410000	987220000	1107400000	874610000	815710000	804890000	1105300000	896730000	840640000	853120000	1061900000	831460000	1009000000	910540000	946540000	778580000
PGRMC1	O00264	O00264	sp|O00264|PGRC1_HUMAN Membrane-associated progesterone receptor component 1 OS=Homo sapiens OX=9606 GN=PGRMC1 PE=1 SV=3	15	16	16315000000	1015300000	802810000	849800000	896070000	922650000	768470000	884140000	683470000	819020000	782110000	444640000	730690000	704990000	528620000	733780000	737550000	806370000	407780000	636210000	698810000	717820000	743790000	1080300000	979620000	1102900000	989550000	1083700000	923800000	846270000	925460000	943070000	968170000	882780000	765360000	945550000	777350000	868530000	787890000	863220000	740080000	670310000	780220000	931050000
INA	Q16352	Q16352	sp|Q16352|AINX_HUMAN Alpha-internexin OS=Homo sapiens OX=9606 GN=INA PE=1 SV=2	26	29	16231000000	0	0	0	0	0	923330000	996330000	1611200000	1200400000	1074300000	636720000	658450000	907910000	877010000	819030000	776870000	1504600000	655800000	1052800000	731250000	856030000	949100000	0	0	0	0	0	1124600000	869580000	1883000000	1308700000	1224300000	1112000000	853010000	1293100000	1388800000	985090000	799090000	1789400000	1215600000	1071200000	849580000	1263300000
RPS15A	P62244	P62244	sp|P62244|RS15A_HUMAN 40S ribosomal protein S15a OS=Homo sapiens OX=9606 GN=RPS15A PE=1 SV=2	10	10	16060000000	1281900000	885560000	1103300000	1076800000	1187900000	763710000	801110000	465600000	555240000	612370000	540700000	703770000	530390000	549550000	801520000	635870000	569830000	381210000	883970000	624180000	556820000	548860000	1222100000	1072500000	1313600000	961390000	1453700000	895130000	676610000	620860000	599600000	737730000	979770000	704800000	789650000	864010000	998370000	753550000	794740000	765840000	834300000	695270000	800300000
RPL21	P46778	P46778	sp|P46778|RL21_HUMAN 60S ribosomal protein L21 OS=Homo sapiens OX=9606 GN=RPL21 PE=1 SV=2	11	11	16049000000	1639700000	1286800000	1282500000	1654600000	1223100000	658750000	760410000	477590000	556010000	482810000	426100000	796430000	441830000	335180000	739550000	536640000	551480000	211870000	771100000	562610000	306990000	347310000	1366400000	1416700000	1402400000	1546600000	1374200000	694500000	670720000	679930000	607880000	602860000	645290000	826630000	735630000	603600000	764140000	669270000	682440000	468640000	766800000	708850000	619010000
HNRNPUL1	Q9BUJ2	Q9BUJ2	sp|Q9BUJ2|HNRL1_HUMAN Heterogeneous nuclear ribonucleoprotein U-like protein 1 OS=Homo sapiens OX=9606 GN=HNRNPUL1 PE=1 SV=2	21	21	16006000000	575500000	509710000	479860000	582190000	469380000	808460000	1059500000	843310000	927700000	828470000	417920000	1051600000	624370000	505670000	879120000	925900000	823820000	325300000	1060100000	1054100000	605930000	647940000	681460000	665260000	636790000	671640000	635390000	903400000	920230000	948670000	902540000	932520000	837670000	1066700000	892570000	830100000	955490000	966700000	882470000	835170000	969850000	1052000000	884780000
EIF3C;EIF3CL	Q99613;B5ME19	Q99613;B5ME19	sp|Q99613|EIF3C_HUMAN Eukaryotic translation initiation factor 3 subunit C OS=Homo sapiens OX=9606 GN=EIF3C PE=1 SV=1;sp|B5ME19|EIFCL_HUMAN Eukaryotic translation initiation factor 3 subunit C-like protein OS=Homo sapiens OX=9606 GN=EIF3CL PE=1 SV=1	31	31	15976000000	1391200000	888760000	942660000	1267100000	991730000	669890000	867680000	591300000	675480000	645600000	358520000	797090000	520210000	441450000	813370000	789750000	650250000	343920000	770130000	675120000	410170000	474670000	1167800000	1020200000	1082800000	1139400000	1141000000	790750000	793030000	706210000	762700000	762980000	803750000	779700000	832120000	770570000	804100000	743890000	752360000	830090000	771610000	826690000	783220000
EIF4B	P23588	P23588	sp|P23588|IF4B_HUMAN Eukaryotic translation initiation factor 4B OS=Homo sapiens OX=9606 GN=EIF4B PE=1 SV=2	17	17	15900000000	1247900000	994060000	1304900000	1174900000	1037500000	732340000	749350000	483020000	854930000	695940000	388020000	656530000	510770000	596000000	501880000	519950000	706350000	394340000	551220000	641110000	540010000	619190000	1099300000	1054700000	1258900000	1088700000	884640000	789760000	807450000	844320000	877380000	824900000	783390000	828270000	797050000	886380000	651750000	719550000	912600000	936140000	716140000	764050000	821990000
EIF2S3;EIF2S3L	P41091;Q2VIR3	P41091;Q2VIR3	sp|P41091|IF2G_HUMAN Eukaryotic translation initiation factor 2 subunit 3 OS=Homo sapiens OX=9606 GN=EIF2S3 PE=1 SV=3;sp|Q2VIR3|IF2GL_HUMAN Eukaryotic translation initiation factor 2 subunit 3B OS=Homo sapiens OX=9606 GN=EIF2S3B PE=2 SV=2	19	19	15873000000	1328300000	772230000	1006500000	1193800000	973500000	665250000	851110000	632840000	679150000	671740000	401790000	799500000	449130000	372620000	754090000	700380000	574110000	373170000	795650000	757720000	518140000	602060000	1118000000	981590000	1082600000	1099600000	1096300000	810340000	797090000	796480000	804750000	769720000	767960000	801940000	791660000	683550000	836410000	791050000	720000000	820810000	803730000	770090000	847150000
AKR1A1	P14550	P14550	sp|P14550|AK1A1_HUMAN Aldo-keto reductase family 1 member A1 OS=Homo sapiens OX=9606 GN=AKR1A1 PE=1 SV=3	20	20	15843000000	739930000	457870000	447920000	898470000	706550000	760900000	1134800000	783640000	830350000	863310000	485140000	989770000	477540000	541610000	794510000	820440000	711670000	459390000	843800000	846260000	587790000	660910000	778550000	626430000	623090000	889800000	880420000	881920000	994870000	986080000	928200000	860740000	855620000	937010000	808710000	869360000	910290000	872660000	870570000	937910000	862240000	804820000	929620000
SRP9	P49458	P49458	sp|P49458|SRP09_HUMAN Signal recognition particle 9 kDa protein OS=Homo sapiens OX=9606 GN=SRP9 PE=1 SV=2	6	6	15835000000	547100000	488440000	499390000	505510000	465840000	879890000	1031400000	973290000	924190000	852150000	511180000	765520000	704150000	748220000	703600000	867240000	863160000	484050000	890510000	767160000	666750000	696640000	574350000	647200000	641160000	539690000	561810000	1009900000	983120000	923210000	1095600000	1042800000	856190000	871690000	999720000	1093800000	813730000	1031600000	1008600000	1025600000	922180000	872260000	999730000
PUF60	Q9UHX1	Q9UHX1	sp|Q9UHX1|PUF60_HUMAN Poly(U)-binding-splicing factor PUF60 OS=Homo sapiens OX=9606 GN=PUF60 PE=1 SV=1	21	21	15710000000	686150000	603790000	613550000	689310000	592020000	769380000	1036100000	777470000	927590000	883450000	414270000	824450000	665090000	534220000	703980000	835900000	763170000	382480000	903500000	877050000	584840000	642480000	715510000	745660000	770700000	744960000	755970000	853850000	916000000	852980000	970460000	979290000	845160000	830880000	914450000	818610000	762220000	945470000	938490000	917050000	874080000	915910000	877030000
HNRNPUL2	Q1KMD3	Q1KMD3	sp|Q1KMD3|HNRL2_HUMAN Heterogeneous nuclear ribonucleoprotein U-like protein 2 OS=Homo sapiens OX=9606 GN=HNRNPUL2 PE=1 SV=1	30	30	15664000000	577450000	628330000	381830000	466280000	352060000	655090000	1063500000	889330000	1035600000	759470000	451430000	969390000	671860000	655260000	779350000	848650000	898560000	290700000	1034300000	967050000	610280000	678290000	599210000	787940000	600120000	546220000	592530000	897550000	944280000	890600000	996290000	922320000	860110000	969220000	859890000	851760000	902390000	903870000	993710000	781480000	946780000	1057300000	982410000
ARF1;ARF3	P84077;P61204	P84077;P61204	sp|P84077|ARF1_HUMAN ADP-ribosylation factor 1 OS=Homo sapiens OX=9606 GN=ARF1 PE=1 SV=2;sp|P61204|ARF3_HUMAN ADP-ribosylation factor 3 OS=Homo sapiens OX=9606 GN=ARF3 PE=1 SV=2	6	9	15627000000	923350000	548110000	723390000	884220000	736740000	755130000	939830000	553130000	825730000	928420000	428410000	793930000	508950000	558370000	824940000	746980000	829880000	349600000	885880000	679030000	557490000	645450000	928240000	714010000	1042700000	1070600000	1212600000	790280000	924340000	721250000	926630000	887340000	727920000	803270000	651970000	735200000	931740000	783570000	914620000	598710000	745650000	732160000	752310000
CNDP2	Q96KP4	Q96KP4	sp|Q96KP4|CNDP2_HUMAN Cytosolic non-specific dipeptidase OS=Homo sapiens OX=9606 GN=CNDP2 PE=1 SV=2	21	21	15600000000	892790000	621050000	638480000	883950000	750370000	689920000	936220000	647460000	683760000	715130000	478560000	787310000	589990000	546880000	786410000	853290000	730160000	485320000	931710000	753110000	536960000	661250000	855510000	701390000	830910000	849780000	942430000	799710000	848210000	845130000	812200000	819160000	857250000	837550000	841120000	855160000	787000000	790920000	843170000	1000100000	834400000	851040000	833290000
NAP1L4	Q99733	Q99733	sp|Q99733|NP1L4_HUMAN Nucleosome assembly protein 1-like 4 OS=Homo sapiens OX=9606 GN=NAP1L4 PE=1 SV=1	12	12	15584000000	644510000	414800000	526690000	659370000	586100000	673040000	1025200000	765530000	878550000	807520000	497630000	865190000	692940000	614090000	798220000	843640000	789520000	457170000	836610000	855470000	669960000	681790000	660250000	555370000	661130000	676820000	707940000	798470000	976380000	1020500000	952170000	933040000	762820000	995850000	1022600000	914410000	852330000	947470000	958250000	910660000	857520000	920410000	987180000
DDAH2	O95865	O95865	sp|O95865|DDAH2_HUMAN N(G),N(G)-dimethylarginine dimethylaminohydrolase 2 OS=Homo sapiens OX=9606 GN=DDAH2 PE=1 SV=1	12	13	15572000000	93010000	31327000	69995000	75694000	58229000	750840000	1373200000	1110000000	1365300000	1110200000	501640000	1043200000	633930000	689680000	778740000	1142300000	1019800000	471060000	944810000	882330000	667490000	759070000	128390000	70748000	103650000	103510000	81737000	904640000	1287700000	1400100000	1437700000	1296500000	845170000	1080100000	920110000	1123200000	811530000	1204300000	1199300000	995670000	926950000	912210000	1026200000
SRSF9	Q13242	Q13242	sp|Q13242|SRSF9_HUMAN Serine/arginine-rich splicing factor 9 OS=Homo sapiens OX=9606 GN=SRSF9 PE=1 SV=1	18	18	15557000000	481720000	385090000	322160000	432220000	367160000	785380000	1113900000	667180000	804480000	688180000	643680000	882130000	694410000	735650000	917040000	856080000	839400000	600250000	1182100000	764470000	665230000	729230000	574080000	524010000	562340000	528340000	605340000	1027600000	972180000	815860000	1003100000	847110000	1077400000	866000000	831670000	1007300000	984030000	874030000	928160000	974990000	1000500000	885830000	967290000
PTBP2	Q9UKA9	Q9UKA9	sp|Q9UKA9|PTBP2_HUMAN Polypyrimidine tract-binding protein 2 OS=Homo sapiens OX=9606 GN=PTBP2 PE=1 SV=1	16	16	15552000000	277110000	203460000	162230000	288090000	148600000	827350000	1170700000	831480000	985250000	920410000	645590000	1029300000	620480000	562720000	915480000	1056000000	807280000	517720000	1065600000	1060300000	684790000	772530000	412770000	338380000	341980000	359680000	405660000	865690000	990090000	950340000	983840000	1010100000	1074900000	1038300000	936700000	892610000	922630000	1098100000	914660000	972810000	968540000	1115300000	956720000
SRP14	P37108	P37108	sp|P37108|SRP14_HUMAN Signal recognition particle 14 kDa protein OS=Homo sapiens OX=9606 GN=SRP14 PE=1 SV=2	8	8	15539000000	646010000	534670000	549150000	666570000	563590000	748240000	1153100000	758840000	839360000	826330000	524680000	963110000	615520000	540160000	869440000	886780000	658220000	258310000	888560000	837510000	548300000	662630000	683020000	676090000	719410000	756890000	725420000	837750000	985760000	815530000	941790000	952060000	897380000	972460000	859320000	796850000	923760000	958710000	821520000	733590000	832140000	935570000	885770000
KRT18	P05783;CON__P05784;CON__H-INV:HIT000015463;CON__Q497I4;Q92764;CON__Q92764;CON__A2A5Y0;CON__O76013;CON__A2AB72;CON__Q14525;CON__Q14532;CON__Q9UE12;CON__REFSEQ:XP_986630;CON__Q15323;CON__O76014;CON__Q2M2I5;CON__O76015;O76015;O76013;O76014;Q14532;Q15323;Q14525;Q2M2I5	P05783	sp|P05783|K1C18_HUMAN Keratin, type I cytoskeletal 18 OS=Homo sapiens OX=9606 GN=KRT18 PE=1 SV=2	24	26	15523000000	2665400000	3576900000	2287200000	2483000000	2080100000	187950000	175820000	92975000	127410000	109990000	135380000	110750000	151530000	154400000	154820000	97238000	155010000	99545000	221860000	159530000	190780000	105380000	2580300000	4603700000	2602000000	2297900000	2048500000	249900000	207120000	166770000	168070000	174680000	291280000	175270000	278530000	282970000	211180000	173730000	202830000	263250000	245900000	213060000	284260000
LARS	Q9P2J5	Q9P2J5	sp|Q9P2J5|SYLC_HUMAN Leucine--tRNA ligase, cytoplasmic OS=Homo sapiens OX=9606 GN=LARS1 PE=1 SV=2	44	44	15508000000	1126400000	728360000	782370000	1433300000	1101800000	781460000	877810000	498990000	588590000	636790000	445040000	774430000	485390000	402130000	798410000	698190000	580830000	257290000	843820000	613940000	485450000	566980000	1049500000	980950000	983170000	1254400000	1209700000	824770000	747130000	673070000	658810000	707250000	841420000	761230000	727160000	697190000	881170000	758090000	738430000	704460000	809660000	721420000	761600000
PAFAH1B1	P43034	P43034	sp|P43034|LIS1_HUMAN Platelet-activating factor acetylhydrolase IB subunit beta OS=Homo sapiens OX=9606 GN=PAFAH1B1 PE=1 SV=2	20	20	15410000000	411430000	220790000	324410000	418310000	371120000	776720000	1101300000	834000000	1114000000	1138800000	434570000	975660000	604580000	496750000	666170000	1023700000	869510000	411760000	950090000	968710000	652790000	644940000	514690000	395620000	474710000	484330000	483320000	900720000	963950000	991150000	1077700000	1117500000	947800000	948420000	934830000	866430000	854030000	999890000	982990000	939450000	886430000	925770000	980840000
CAPZA1	P52907	P52907	sp|P52907|CAZA1_HUMAN F-actin-capping protein subunit alpha-1 OS=Homo sapiens OX=9606 GN=CAPZA1 PE=1 SV=3	11	12	15380000000	649280000	434670000	510810000	615040000	387070000	740130000	1023500000	850250000	799750000	848890000	454670000	891940000	680230000	561110000	733650000	932570000	752510000	522210000	896120000	661510000	682050000	752160000	620790000	535770000	550320000	656000000	562540000	770800000	906250000	996340000	888730000	910720000	741300000	935010000	804680000	807760000	806670000	958980000	849140000	800460000	866230000	919050000	894620000
PSPC1	Q8WXF1	Q8WXF1	sp|Q8WXF1|PSPC1_HUMAN Paraspeckle component 1 OS=Homo sapiens OX=9606 GN=PSPC1 PE=1 SV=1	20	20	15350000000	575920000	504690000	596570000	496420000	467720000	880790000	1036100000	657530000	770870000	762700000	592780000	793860000	655030000	620570000	844280000	841030000	662910000	411280000	1012300000	842340000	628690000	696010000	572040000	583510000	708540000	589460000	593930000	991350000	894430000	890260000	857130000	843790000	913090000	858540000	939250000	922940000	916180000	889010000	832740000	901680000	983730000	864640000	1017500000
RBM4	Q9BWF3	Q9BWF3	sp|Q9BWF3|RBM4_HUMAN RNA-binding protein 4 OS=Homo sapiens OX=9606 GN=RBM4 PE=1 SV=1	4	18	15337000000	713680000	750460000	588670000	732680000	565500000	847360000	806680000	576650000	753580000	761810000	499020000	759060000	635050000	589650000	732680000	816120000	690730000	369530000	1080400000	728960000	676220000	661950000	723460000	886450000	806520000	768070000	734180000	974760000	739320000	718250000	782620000	839090000	923460000	778160000	891940000	930000000	873740000	811970000	919710000	798650000	1024500000	831170000	950360000
SYNE2	Q8WXH0	Q8WXH0	sp|Q8WXH0|SYNE2_HUMAN Nesprin-2 OS=Homo sapiens OX=9606 GN=SYNE2 PE=1 SV=3	152	154	15262000000	57344000	11377000	5879600	24255000	7426600	1049800000	1547300000	249240000	742080000	662100000	547010000	1402200000	554690000	470880000	1388700000	1444900000	378610000	346300000	1658800000	1679100000	516620000	516960000	37281000	0	0	24776000	19093000	1087700000	1754600000	462480000	959800000	666290000	1100700000	991810000	714320000	700450000	1872400000	944190000	616520000	774850000	1769200000	1492200000	891350000
RBBP5	Q15291	Q15291	sp|Q15291|RBBP5_HUMAN Retinoblastoma-binding protein 5 OS=Homo sapiens OX=9606 GN=RBBP5 PE=1 SV=2	11	11	15137000000	997070000	715280000	809520000	1193200000	868160000	607470000	739540000	562220000	662850000	637970000	520590000	741180000	629570000	585220000	665170000	706360000	831780000	467720000	788170000	757700000	26865000	623870000	771490000	827020000	0	825720000	1016800000	762480000	695720000	751910000	854010000	798000000	1174300000	974410000	880570000	881760000	725880000	775970000	847330000	956060000	849200000	955960000	0
MAT2A	P31153;Q00266	P31153	sp|P31153|METK2_HUMAN S-adenosylmethionine synthase isoform type-2 OS=Homo sapiens OX=9606 GN=MAT2A PE=1 SV=1	16	16	15109000000	624730000	460850000	657300000	644670000	508010000	759380000	855450000	728820000	560990000	757240000	469640000	802090000	678640000	676310000	818250000	738240000	817450000	435520000	939940000	821910000	593430000	760070000	669920000	594590000	759210000	659520000	566570000	931080000	752730000	951440000	722260000	898100000	835060000	842260000	1006100000	1006600000	880820000	853540000	960440000	930390000	882130000	869820000	897160000
CAD	P27708	P27708	sp|P27708|PYR1_HUMAN CAD protein OS=Homo sapiens OX=9606 GN=CAD PE=1 SV=3	57	59	15081000000	1758600000	1119200000	1328300000	1589000000	1391200000	526530000	528420000	369960000	419420000	451550000	389280000	585290000	327960000	392810000	612130000	528610000	546290000	226190000	644180000	551640000	362660000	432120000	1368600000	1203800000	1380600000	1365500000	1374500000	637510000	619860000	608810000	603880000	615730000	700180000	768310000	643370000	580890000	688500000	639680000	645430000	692640000	627980000	702680000	634750000
DEK	P35659	P35659	sp|P35659|DEK_HUMAN Protein DEK OS=Homo sapiens OX=9606 GN=DEK PE=1 SV=1	16	16	15076000000	699030000	660830000	533030000	694690000	538510000	775420000	864330000	633900000	702920000	686700000	594470000	824000000	593060000	616900000	874460000	717470000	754360000	367360000	940150000	793260000	569480000	641570000	788040000	858790000	708940000	780700000	794940000	847190000	803570000	669810000	847830000	802600000	861220000	868890000	875340000	877450000	865860000	841680000	845800000	827670000	922020000	802930000	814870000
PSMD6	Q15008	Q15008	sp|Q15008|PSMD6_HUMAN 26S proteasome non-ATPase regulatory subunit 6 OS=Homo sapiens OX=9606 GN=PSMD6 PE=1 SV=1	23	23	15018000000	807360000	442000000	596900000	720890000	562960000	749360000	897650000	511590000	784440000	810220000	403130000	908110000	445890000	456260000	906510000	911860000	610540000	344840000	1215600000	921800000	455970000	553830000	735340000	653900000	728270000	676580000	679580000	783130000	802360000	796590000	876690000	838700000	821070000	841060000	788950000	877590000	871210000	802370000	819930000	894250000	968980000	822790000	850120000
YARS	P54577	P54577	sp|P54577|SYYC_HUMAN Tyrosine--tRNA ligase, cytoplasmic OS=Homo sapiens OX=9606 GN=YARS1 PE=1 SV=4	32	32	15015000000	1547700000	763790000	916920000	1545200000	1141100000	720960000	580250000	402380000	524550000	476670000	517260000	407760000	478960000	519990000	785830000	424610000	586860000	283090000	789630000	471050000	505810000	625130000	1340200000	970690000	978730000	1220000000	1226000000	810240000	583900000	656990000	625520000	660460000	886190000	551940000	706190000	786900000	804790000	610910000	692940000	763480000	792640000	655550000	777860000
LUC7L2	Q9Y383	Q9Y383	sp|Q9Y383|LC7L2_HUMAN Putative RNA-binding protein Luc7-like 2 OS=Homo sapiens OX=9606 GN=LUC7L2 PE=1 SV=2	12	17	15013000000	365120000	373410000	246260000	469600000	290340000	973350000	987020000	643790000	788680000	808010000	605720000	886730000	691290000	688380000	892350000	940040000	676720000	515220000	831260000	918360000	638870000	782750000	454240000	569530000	425130000	494150000	532640000	1045300000	851860000	781010000	927250000	943490000	1008500000	912200000	896070000	874400000	929380000	1072300000	928070000	873940000	976920000	974740000	983660000
RAB11B;RAB11A	Q15907;P62491;P57735	Q15907;P62491	sp|Q15907|RB11B_HUMAN Ras-related protein Rab-11B OS=Homo sapiens OX=9606 GN=RAB11B PE=1 SV=4;sp|P62491|RB11A_HUMAN Ras-related protein Rab-11A OS=Homo sapiens OX=9606 GN=RAB11A PE=1 SV=3	13	13	15004000000	861760000	641600000	599100000	842180000	728980000	628000000	776190000	662820000	730200000	750080000	392040000	678800000	629880000	663680000	775460000	767650000	730920000	400390000	863500000	666560000	609640000	604180000	816520000	813070000	795440000	857040000	837520000	843800000	790150000	800960000	784440000	822390000	829660000	812760000	786460000	869820000	874740000	808180000	801390000	944460000	867850000	712220000	810090000
TCERG1	O14776;Q5VWI1	O14776	sp|O14776|TCRG1_HUMAN Transcription elongation regulator 1 OS=Homo sapiens OX=9606 GN=TCERG1 PE=1 SV=2	32	32	15000000000	718110000	453150000	599820000	610550000	511260000	739290000	900300000	779460000	603130000	622560000	572740000	781600000	642300000	713550000	653510000	674280000	837270000	543870000	991910000	884840000	623370000	542910000	631180000	628630000	735430000	589500000	644440000	849470000	850770000	911990000	867840000	847520000	887130000	901090000	965870000	992220000	794710000	916390000	913920000	1010900000	877060000	834430000	883290000
SAFB	Q15424	Q15424	sp|Q15424|SAFB1_HUMAN Scaffold attachment factor B1 OS=Homo sapiens OX=9606 GN=SAFB PE=1 SV=4	15	26	14943000000	744450000	823150000	613100000	749390000	650470000	552380000	940090000	756520000	862300000	849300000	400280000	664280000	515000000	499740000	682070000	699170000	924510000	366830000	747180000	803390000	460090000	639620000	715940000	959800000	778660000	676330000	694640000	718240000	828340000	782220000	904740000	927870000	712260000	841120000	754040000	858670000	710470000	806280000	924450000	859110000	784310000	809180000	783260000
GLOD4	Q9HC38	Q9HC38	sp|Q9HC38|GLOD4_HUMAN Glyoxalase domain-containing protein 4 OS=Homo sapiens OX=9606 GN=GLOD4 PE=1 SV=1	18	18	14908000000	295690000	195090000	230340000	269540000	234940000	774070000	1361200000	671010000	1142600000	941510000	506150000	846850000	532730000	541780000	896820000	1103300000	776900000	441890000	996340000	952220000	561470000	635160000	342340000	288440000	366270000	367050000	385260000	919220000	1167600000	895050000	1126400000	996380000	878670000	917450000	870040000	762180000	948150000	1128100000	947200000	926650000	963900000	999840000	833950000
CTSD	P07339	P07339	sp|P07339|CATD_HUMAN Cathepsin D OS=Homo sapiens OX=9606 GN=CTSD PE=1 SV=1	16	16	14907000000	849360000	876710000	683510000	946890000	754860000	708830000	815040000	778230000	750430000	756540000	391530000	562720000	585470000	568170000	654970000	841260000	695900000	347720000	764770000	428150000	571790000	573920000	936400000	1012700000	867260000	1026200000	946610000	835120000	791880000	895780000	844390000	795430000	685540000	595820000	913480000	863400000	741890000	841430000	841490000	722210000	740470000	562680000	770900000
ECHS1	P30084	P30084	sp|P30084|ECHM_HUMAN Enoyl-CoA hydratase, mitochondrial OS=Homo sapiens OX=9606 GN=ECHS1 PE=1 SV=4	17	17	14865000000	473130000	717580000	401310000	542190000	500460000	746550000	1131600000	614670000	888970000	731190000	413610000	826270000	597840000	583390000	764740000	789870000	742470000	329470000	1014300000	837030000	512370000	705700000	538680000	957620000	557090000	623050000	595360000	905300000	913700000	781740000	922700000	803220000	726200000	875720000	806370000	838910000	871640000	868090000	870030000	729130000	941090000	935470000	825470000
PSMD11	O00231	O00231	sp|O00231|PSD11_HUMAN 26S proteasome non-ATPase regulatory subunit 11 OS=Homo sapiens OX=9606 GN=PSMD11 PE=1 SV=3	24	24	14798000000	833680000	536180000	651470000	810070000	649100000	703570000	907260000	630810000	855690000	694420000	416190000	712150000	513400000	459130000	753110000	787630000	715760000	327960000	874160000	796830000	564200000	605230000	779210000	684030000	749910000	794200000	740420000	768300000	827670000	795730000	838820000	808340000	824980000	781720000	765360000	770670000	800600000	852660000	840290000	887290000	831770000	841660000	819600000
PAK2	Q13177	Q13177	sp|Q13177|PAK2_HUMAN Serine/threonine-protein kinase PAK 2 OS=Homo sapiens OX=9606 GN=PAK2 PE=1 SV=3	11	21	14774000000	432410000	170580000	252570000	308490000	285590000	707190000	1076100000	913540000	941950000	994460000	457900000	952600000	639270000	600650000	733930000	947260000	821990000	388170000	970540000	964020000	613070000	601400000	502870000	331560000	405940000	449860000	387750000	838580000	964830000	1074800000	988200000	1044200000	828720000	973440000	944120000	867720000	802450000	882940000	990830000	866040000	918290000	922480000	880210000
ARCN1	P48444	P48444	sp|P48444|COPD_HUMAN Coatomer subunit delta OS=Homo sapiens OX=9606 GN=ARCN1 PE=1 SV=1	24	24	14746000000	945190000	776600000	686720000	1005200000	758410000	737300000	864120000	599410000	816490000	687860000	497240000	611400000	483740000	578940000	739040000	816570000	426410000	209390000	932950000	700480000	500590000	371610000	845010000	821060000	815720000	881500000	844070000	821340000	747960000	730910000	790110000	799170000	821670000	677840000	734540000	827980000	774130000	733160000	783700000	918520000	773130000	688280000	747120000
LASP1	Q14847	Q14847	sp|Q14847|LASP1_HUMAN LIM and SH3 domain protein 1 OS=Homo sapiens OX=9606 GN=LASP1 PE=1 SV=2	12	12	14732000000	1410000000	758250000	1027900000	1156700000	900850000	506960000	872770000	764000000	843940000	669460000	341740000	646210000	479920000	405450000	434020000	641140000	600100000	207370000	598520000	621800000	407300000	437140000	1241900000	997450000	1054200000	1039000000	1056600000	632600000	771670000	1030800000	835020000	804270000	494680000	766130000	688540000	689240000	541350000	730010000	768140000	539000000	642690000	679900000	625170000
RPL27A	P46776	P46776	sp|P46776|RL27A_HUMAN 60S ribosomal protein L27a OS=Homo sapiens OX=9606 GN=RPL27A PE=1 SV=2	9	9	14730000000	1660400000	1084600000	1291200000	1584000000	1518100000	513250000	664800000	503810000	474000000	446050000	377010000	486070000	314500000	292620000	603110000	459310000	390690000	310540000	527730000	565350000	270480000	392180000	1633300000	1218300000	1703100000	1607100000	1719500000	582440000	600180000	561010000	585280000	470040000	586990000	485660000	511120000	510510000	712420000	492970000	503290000	670600000	609560000	600510000	480040000
HDAC2	Q92769	Q92769	sp|Q92769|HDAC2_HUMAN Histone deacetylase 2 OS=Homo sapiens OX=9606 GN=HDAC2 PE=1 SV=2	11	17	14675000000	594910000	711900000	471830000	561430000	529680000	798740000	942400000	630700000	706750000	735580000	494350000	782680000	519520000	456200000	755030000	783400000	736820000	406640000	874420000	877230000	576330000	728210000	781680000	873000000	644100000	781150000	709660000	882950000	845580000	819030000	792120000	852300000	774070000	872800000	702290000	785300000	861340000	787550000	830300000	836810000	860220000	847720000	789760000
ANP32B	Q92688	Q92688	sp|Q92688|AN32B_HUMAN Acidic leucine-rich nuclear phosphoprotein 32 family member B OS=Homo sapiens OX=9606 GN=ANP32B PE=1 SV=1	10	10	14655000000	261590000	144410000	168990000	268250000	215550000	885080000	1142300000	814390000	896590000	898570000	519480000	765240000	715580000	604020000	700310000	941110000	986240000	513280000	968590000	931730000	628330000	685020000	303560000	243170000	257840000	362670000	370180000	890800000	1055500000	713810000	956310000	798820000	781900000	804520000	823260000	683270000	1020300000	869530000	914750000	1010500000	856760000	831570000	712710000
HINT1	P49773	P49773	sp|P49773|HINT1_HUMAN Adenosine 5-monophosphoramidase HINT1 OS=Homo sapiens OX=9606 GN=HINT1 PE=1 SV=2	9	9	14648000000	426110000	216640000	355340000	483750000	456740000	815970000	958730000	712060000	826110000	728310000	538510000	751140000	661060000	629170000	898640000	911450000	739620000	494260000	1032300000	669510000	675000000	667820000	479950000	322920000	485590000	495880000	561780000	1003400000	845490000	904760000	832730000	836230000	969780000	802070000	942310000	957420000	928930000	1009100000	852730000	992260000	1007300000	736490000	1068600000
FDPS	P14324	P14324	sp|P14324|FPPS_HUMAN Farnesyl pyrophosphate synthase OS=Homo sapiens OX=9606 GN=FDPS PE=1 SV=4	10	10	14571000000	534360000	392950000	494380000	531030000	529720000	668090000	890040000	824150000	735590000	811780000	479460000	820490000	562290000	539580000	755500000	796950000	750360000	307080000	867920000	812610000	788170000	678520000	629650000	573330000	632280000	555660000	612860000	839660000	965460000	826090000	812950000	851400000	505510000	855850000	762570000	702040000	908690000	842520000	850250000	692260000	949560000	933280000	830200000
ACO2	Q99798	Q99798	sp|Q99798|ACON_HUMAN Aconitate hydratase, mitochondrial OS=Homo sapiens OX=9606 GN=ACO2 PE=1 SV=2	24	24	14522000000	590010000	789780000	511390000	557300000	500140000	764670000	968070000	619020000	818220000	735210000	444210000	849150000	552860000	505250000	808410000	846710000	585970000	314470000	927090000	800360000	484680000	549110000	643660000	929420000	653120000	613020000	634040000	911970000	805170000	816290000	822610000	834530000	834410000	852000000	780630000	755890000	836120000	859620000	762310000	777620000	869270000	825140000	794890000
G3BP2	Q9UN86	Q9UN86	sp|Q9UN86|G3BP2_HUMAN Ras GTPase-activating protein-binding protein 2 OS=Homo sapiens OX=9606 GN=G3BP2 PE=1 SV=2	13	13	14467000000	1165500000	814360000	815740000	972310000	930180000	559960000	671510000	599480000	667360000	541710000	378070000	544220000	482900000	507170000	661230000	606650000	596330000	333650000	765410000	699380000	528870000	624790000	1027000000	897370000	907660000	952950000	1112300000	648610000	639650000	852610000	687850000	641910000	732460000	654830000	822100000	854450000	707020000	687420000	720570000	845170000	749870000	693390000	777810000
MAP4	P27816	P27816	sp|P27816|MAP4_HUMAN Microtubule-associated protein 4 OS=Homo sapiens OX=9606 GN=MAP4 PE=1 SV=3	43	43	14443000000	1618600000	936390000	1260000000	1519500000	1423300000	420700000	725270000	660230000	694250000	553680000	219850000	459640000	352230000	199590000	447770000	435330000	552710000	205860000	506790000	570990000	272310000	408250000	1301000000	863330000	1253100000	1249400000	1359100000	639670000	609340000	826970000	707800000	699020000	550380000	699050000	685780000	503280000	571230000	596130000	643030000	609310000	587770000	648380000	602820000
PRDX3	P30048	P30048	sp|P30048|PRDX3_HUMAN Thioredoxin-dependent peroxide reductase, mitochondrial OS=Homo sapiens OX=9606 GN=PRDX3 PE=1 SV=3	12	12	14426000000	727410000	788980000	589570000	722190000	528420000	669880000	1072600000	650000000	732770000	714640000	310370000	798530000	475650000	456180000	682310000	755640000	607420000	330030000	928680000	817840000	498140000	569070000	663770000	844070000	669560000	761670000	653360000	719010000	847580000	837680000	730590000	785160000	722110000	713150000	715730000	717100000	668960000	766690000	732290000	789320000	833260000	794300000	695240000
CSDE1	O75534	O75534	sp|O75534|CSDE1_HUMAN Cold shock domain-containing protein E1 OS=Homo sapiens OX=9606 GN=CSDE1 PE=1 SV=2	30	30	14387000000	1262400000	782600000	1090800000	1273600000	1071900000	778060000	599740000	418940000	535650000	579180000	458250000	554300000	462280000	349470000	723680000	468840000	479890000	203420000	890220000	522860000	346090000	534840000	1088700000	963080000	1181700000	1054300000	1091600000	808330000	536200000	604020000	589360000	659330000	815950000	601580000	692140000	769290000	743660000	545430000	647530000	793860000	805260000	595590000	725000000
RPL28	P46779	P46779	sp|P46779|RL28_HUMAN 60S ribosomal protein L28 OS=Homo sapiens OX=9606 GN=RPL28 PE=1 SV=3	10	10	14386000000	1807100000	981190000	1113700000	1489200000	1234700000	446270000	567820000	342410000	345680000	383590000	618100000	679520000	381040000	510780000	510110000	394160000	423280000	383850000	496040000	494230000	406570000	377150000	1812200000	1155800000	1313800000	1416600000	1338300000	550010000	624870000	533240000	458380000	518840000	897000000	777150000	574570000	674990000	640860000	484240000	529060000	643250000	552690000	555460000	568070000
RPL13A	P40429;Q6NVV1	P40429	sp|P40429|RL13A_HUMAN 60S ribosomal protein L13a OS=Homo sapiens OX=9606 GN=RPL13A PE=1 SV=2	11	11	14360000000	1306900000	1172100000	1035100000	1231700000	1151400000	484960000	726740000	442560000	529120000	615770000	293540000	641210000	417400000	459140000	556960000	518140000	452340000	173390000	746650000	541680000	342660000	520620000	1361200000	1148700000	1242900000	1311200000	1334700000	557260000	684810000	521030000	576050000	605070000	594030000	643920000	601630000	660630000	612320000	498840000	592720000	625260000	676130000	572330000	531160000
PNN	Q9H307	Q9H307	sp|Q9H307|PININ_HUMAN Pinin OS=Homo sapiens OX=9606 GN=PNN PE=1 SV=5	22	22	14148000000	573080000	855130000	747940000	590950000	528360000	700880000	672150000	648620000	663180000	711140000	608530000	617670000	509400000	698660000	574210000	615130000	765370000	413800000	630150000	736210000	593100000	694250000	615970000	939900000	779540000	606200000	663010000	786510000	749130000	825750000	751130000	783850000	832390000	753220000	853080000	882090000	728580000	710330000	831230000	795740000	677910000	735210000	806840000
HNRNPAB	Q99729	Q99729	sp|Q99729|ROAA_HUMAN Heterogeneous nuclear ribonucleoprotein A/B OS=Homo sapiens OX=9606 GN=HNRNPAB PE=1 SV=2	10	10	14129000000	1031000000	1204400000	759210000	843460000	747330000	696720000	709650000	547920000	559870000	683040000	367610000	697900000	518270000	366700000	660230000	607730000	590350000	361770000	652370000	650280000	402350000	470690000	893720000	1200600000	828210000	863530000	754620000	635780000	689840000	689460000	637770000	684310000	492960000	733530000	663830000	545560000	732620000	753700000	692420000	606580000	682780000	779400000	581890000
NHP2L1	P55769	P55769	sp|P55769|NH2L1_HUMAN NHP2-like protein 1 OS=Homo sapiens OX=9606 GN=SNU13 PE=1 SV=3	9	9	14094000000	860750000	953890000	645750000	827500000	645930000	655210000	805080000	500690000	596190000	639800000	473700000	686580000	547250000	561180000	619950000	749490000	525600000	301090000	832700000	665060000	481860000	518280000	856390000	1073600000	828130000	843830000	802700000	771940000	757400000	666300000	631670000	725410000	886090000	673760000	725810000	766920000	749730000	780260000	677560000	779490000	847890000	712910000	716470000
RARS	P54136	P54136	sp|P54136|SYRC_HUMAN Arginine--tRNA ligase, cytoplasmic OS=Homo sapiens OX=9606 GN=RARS1 PE=1 SV=2	37	37	14071000000	990550000	588090000	834080000	912880000	801960000	715490000	724790000	473310000	554070000	531780000	488810000	671460000	482640000	471300000	633770000	633020000	572250000	393170000	713620000	748610000	559240000	576340000	870230000	778610000	971720000	885480000	894740000	800890000	705590000	674500000	668890000	701710000	792120000	724560000	710680000	670180000	752680000	753760000	674630000	738190000	779400000	757040000	772890000
RAC1;RAC2	P63000;P15153	P63000;P15153	sp|P63000|RAC1_HUMAN Ras-related C3 botulinum toxin substrate 1 OS=Homo sapiens OX=9606 GN=RAC1 PE=1 SV=1;sp|P15153|RAC2_HUMAN Ras-related C3 botulinum toxin substrate 2 OS=Homo sapiens OX=9606 GN=RAC2 PE=1 SV=1	5	10	14020000000	515660000	358780000	481770000	547180000	466350000	597720000	923650000	825500000	741130000	760030000	472880000	1011000000	572390000	533380000	718730000	722980000	603810000	407390000	843620000	781020000	540410000	594160000	591030000	406470000	549950000	558060000	484640000	840010000	928250000	926260000	795430000	876830000	791330000	1007500000	774790000	775260000	860610000	815270000	889280000	829490000	900180000	875930000	767430000
GARS	P41250	P41250	sp|P41250|GARS_HUMAN Glycine--tRNA ligase OS=Homo sapiens OX=9606 GN=GARS1 PE=1 SV=3	25	25	13953000000	1511900000	879240000	810640000	1303800000	1095800000	588810000	531130000	399870000	501350000	568520000	348380000	484110000	398310000	349210000	691840000	437610000	563200000	263690000	715410000	602830000	416410000	491250000	1378000000	902130000	1119500000	1303700000	1211000000	659520000	562540000	542850000	565950000	562260000	693490000	532100000	694890000	631260000	743330000	518660000	663490000	643450000	645360000	612890000	621200000
HADHA	P40939	P40939	sp|P40939|ECHA_HUMAN Trifunctional enzyme subunit alpha, mitochondrial OS=Homo sapiens OX=9606 GN=HADHA PE=1 SV=2	31	31	13951000000	628630000	665790000	554090000	526890000	504610000	673850000	932250000	559130000	807310000	673720000	415970000	811070000	651010000	490470000	792150000	765400000	634020000	258820000	891450000	623140000	554350000	536790000	608900000	824050000	691880000	566840000	551060000	801330000	804940000	801870000	770460000	782210000	819580000	792220000	837140000	749300000	814030000	835520000	764330000	741670000	797880000	753060000	810370000
NUCKS1	Q9H1E3	Q9H1E3	sp|Q9H1E3|NUCKS_HUMAN Nuclear ubiquitous casein and cyclin-dependent kinase substrate 1 OS=Homo sapiens OX=9606 GN=NUCKS1 PE=1 SV=1	9	9	13950000000	269080000	260350000	196620000	178640000	163370000	798610000	950550000	1085200000	677670000	933010000	454170000	1100600000	525890000	681650000	695360000	732220000	834430000	530990000	821040000	774650000	653230000	632560000	319850000	450240000	276100000	241270000	220400000	1013600000	897190000	1058300000	785710000	990090000	779720000	1049400000	682460000	1105300000	804500000	834480000	1004200000	1006200000	859600000	920830000	1056600000
PPA1	Q15181	Q15181	sp|Q15181|IPYR_HUMAN Inorganic pyrophosphatase OS=Homo sapiens OX=9606 GN=PPA1 PE=1 SV=2	19	19	13922000000	792550000	414060000	579180000	782880000	627400000	719050000	821540000	521400000	668790000	676130000	459860000	618420000	533590000	535240000	807880000	605490000	620210000	388410000	925460000	583060000	522370000	719210000	769310000	501510000	690550000	832460000	747690000	775180000	813990000	698850000	710440000	755630000	698910000	678280000	787980000	753290000	824890000	733310000	789560000	684820000	847040000	674380000	780370000
CNN2	Q99439	Q99439	sp|Q99439|CNN2_HUMAN Calponin-2 OS=Homo sapiens OX=9606 GN=CNN2 PE=1 SV=4	18	19	13898000000	1608000000	1191600000	1380500000	1519500000	1167400000	584340000	391930000	381000000	433710000	359500000	363080000	479910000	395080000	371030000	432640000	455170000	414760000	365770000	541670000	328740000	371310000	361250000	1389200000	1445200000	1657800000	1408000000	1360800000	683190000	494220000	500840000	497380000	548530000	577820000	525290000	560900000	573630000	560980000	522200000	537350000	567900000	600730000	511780000	526320000
UQCRC1	P31930	P31930	sp|P31930|QCR1_HUMAN Cytochrome b-c1 complex subunit 1, mitochondrial OS=Homo sapiens OX=9606 GN=UQCRC1 PE=1 SV=3	17	18	13849000000	711710000	1183100000	620260000	823090000	639450000	695440000	724600000	457900000	547420000	552270000	507440000	619670000	457000000	604640000	680430000	670140000	467110000	502460000	712580000	552620000	538760000	580600000	672330000	1256400000	686610000	775370000	787880000	767900000	777420000	674170000	641940000	738610000	784200000	730360000	678270000	821800000	769820000	841940000	638390000	782450000	871950000	617090000	742490000
ACTN1	P12814	P12814	sp|P12814|ACTN1_HUMAN Alpha-actinin-1 OS=Homo sapiens OX=9606 GN=ACTN1 PE=1 SV=2	29	30	13833000000	1726300000	876090000	1483000000	1701300000	1521400000	436680000	607030000	308240000	481220000	400650000	291130000	339170000	282280000	358930000	357320000	479170000	421090000	240430000	460230000	391080000	321620000	349140000	1535000000	993760000	1383000000	1527700000	1398000000	518740000	598660000	526250000	604900000	544760000	470780000	592060000	507980000	511670000	525000000	652800000	553120000	493240000	581870000	604650000	507790000
ACTR3	P61158	P61158	sp|P61158|ARP3_HUMAN Actin-related protein 3 OS=Homo sapiens OX=9606 GN=ACTR3 PE=1 SV=3	18	22	13828000000	702930000	556190000	575600000	585820000	586480000	647100000	893140000	634740000	758140000	657460000	507690000	650430000	557440000	471180000	621760000	718860000	643690000	469890000	790390000	701680000	514660000	582780000	745670000	707840000	763710000	731830000	738030000	743820000	787130000	757390000	786130000	804660000	714680000	792660000	732860000	699840000	645510000	695320000	758480000	677620000	742670000	783610000	715520000
H2AFY2	Q9P0M6	Q9P0M6	sp|Q9P0M6|H2AW_HUMAN Core histone macro-H2A.2 OS=Homo sapiens OX=9606 GN=MACROH2A2 PE=1 SV=3	14	16	13793000000	8686300	51234000	43568000	48067000	45218000	809260000	1220500000	757680000	1052800000	951990000	607460000	1079400000	565730000	491150000	940350000	935520000	682080000	402860000	1144500000	832630000	517970000	604270000	0	69292000	61753000	56943000	67741000	952570000	1016700000	966360000	982760000	1063500000	981970000	1140900000	815680000	734150000	960780000	952520000	824690000	975150000	1084100000	896300000	835440000
ALDOC	P09972	P09972	sp|P09972|ALDOC_HUMAN Fructose-bisphosphate aldolase C OS=Homo sapiens OX=9606 GN=ALDOC PE=1 SV=2	15	15	13748000000	1833800000	1025700000	1276400000	1591900000	1388800000	193570000	627080000	593470000	513570000	646450000	184910000	675250000	240880000	214530000	224400000	625030000	390270000	191510000	263520000	532710000	241800000	272340000	1391100000	987770000	1141300000	1368300000	1336000000	249680000	563600000	551740000	503360000	543540000	285170000	506680000	337120000	305650000	217650000	501260000	429530000	346660000	239560000	445070000	319350000
RPS13	P62277	P62277	sp|P62277|RS13_HUMAN 40S ribosomal protein S13 OS=Homo sapiens OX=9606 GN=RPS13 PE=1 SV=2	10	10	13694000000	1644900000	1243400000	1251800000	1595400000	1396200000	350860000	501920000	336300000	311880000	377720000	381900000	666390000	293970000	299050000	493400000	405590000	374460000	195330000	513270000	379090000	371770000	309610000	1457300000	1574000000	1348000000	1687500000	1617800000	394300000	455450000	479780000	352470000	430450000	644560000	683010000	527710000	485500000	541400000	457400000	464960000	412550000	583740000	407480000	544440000
H1FX	Q92522	Q92522	sp|Q92522|H1X_HUMAN Histone H1.10 OS=Homo sapiens OX=9606 GN=H1-10 PE=1 SV=1	7	7	13682000000	280000000	276290000	171640000	111320000	159430000	545820000	1147400000	510070000	680200000	709210000	1012800000	1897700000	342110000	579850000	774840000	623780000	742580000	332230000	674470000	878460000	674990000	556960000	327910000	380810000	204350000	233440000	257670000	616460000	1048000000	616360000	676270000	785290000	1141000000	1841500000	654000000	759810000	724630000	723700000	801010000	553090000	793160000	921770000	961560000
HMGB3	O15347	O15347	sp|O15347|HMGB3_HUMAN High mobility group protein B3 OS=Homo sapiens OX=9606 GN=HMGB3 PE=1 SV=4	17	17	13570000000	869890000	568510000	690740000	877410000	769420000	627590000	907070000	596170000	564850000	670450000	308740000	810360000	466730000	440490000	646840000	688980000	630020000	266510000	621610000	661560000	396240000	489720000	884600000	760620000	876700000	870160000	908390000	722240000	773960000	725390000	656660000	712040000	635400000	808920000	608000000	659590000	750550000	761540000	665590000	654070000	673630000	707220000	640380000
EIF3B	P55884	P55884	sp|P55884|EIF3B_HUMAN Eukaryotic translation initiation factor 3 subunit B OS=Homo sapiens OX=9606 GN=EIF3B PE=1 SV=3	33	33	13550000000	1245600000	781900000	987310000	1272500000	1041000000	541120000	730080000	393530000	636860000	491310000	320650000	525240000	336970000	385100000	536210000	533740000	437340000	246050000	702140000	615550000	381530000	408770000	985500000	869590000	952390000	960860000	1056200000	656120000	610060000	616440000	611880000	689520000	729890000	603850000	588610000	648480000	594710000	695010000	621810000	750990000	647520000	646170000	631410000
IPO9	Q96P70	Q96P70	sp|Q96P70|IPO9_HUMAN Importin-9 OS=Homo sapiens OX=9606 GN=IPO9 PE=1 SV=3	28	28	13408000000	591910000	230460000	388350000	514430000	478800000	717500000	1080300000	605970000	974360000	699480000	387020000	668820000	516990000	411770000	867350000	747210000	677140000	170810000	822340000	847810000	423250000	586420000	548850000	392850000	538770000	509420000	553010000	719000000	835540000	793500000	908360000	826170000	738910000	711250000	783130000	720720000	779540000	769340000	729510000	736030000	742870000	833920000	707060000
RPL18	Q07020	Q07020	sp|Q07020|RL18_HUMAN 60S ribosomal protein L18 OS=Homo sapiens OX=9606 GN=RPL18 PE=1 SV=2	10	10	13375000000	2230500000	1975500000	1746100000	1494300000	2040800000	301530000	350910000	120800000	235280000	171350000	267420000	260460000	127150000	154170000	415400000	204830000	147340000	141490000	531680000	224060000	88268000	146030000	2162900000	2297000000	1956300000	1412800000	2362900000	348990000	368690000	181030000	269560000	225830000	535700000	310050000	242700000	268370000	512790000	257260000	188690000	389650000	512710000	278580000	164000000
ACIN1	Q9UKV3	Q9UKV3	sp|Q9UKV3|ACINU_HUMAN Apoptotic chromatin condensation inducer in the nucleus OS=Homo sapiens OX=9606 GN=ACIN1 PE=1 SV=2	31	31	13349000000	643790000	757410000	631680000	636430000	541290000	545410000	1248100000	565490000	703700000	650210000	410040000	706460000	472980000	372660000	528380000	606060000	634270000	328550000	716290000	686620000	514340000	448520000	685580000	891670000	811160000	681430000	764070000	669910000	729000000	721550000	736200000	689490000	770620000	735650000	682610000	706880000	669950000	637750000	709070000	776830000	678520000	703190000	788140000
NPC2	P61916	P61916	sp|P61916|NPC2_HUMAN NPC intracellular cholesterol transporter 2 OS=Homo sapiens OX=9606 GN=NPC2 PE=1 SV=1	11	11	13320000000	476990000	419520000	400990000	349920000	323770000	736470000	981110000	400140000	1005000000	686060000	455900000	739610000	475770000	513810000	622810000	806370000	719070000	317560000	912500000	846830000	498080000	632220000	529380000	582220000	521180000	402870000	450500000	834090000	840320000	637480000	1107600000	829000000	782530000	768650000	679480000	741860000	691130000	873860000	817080000	701010000	802330000	925120000	741830000
EIF1AX	P47813	P47813	sp|P47813|IF1AX_HUMAN Eukaryotic translation initiation factor 1A, X-chromosomal OS=Homo sapiens OX=9606 GN=EIF1AX PE=1 SV=2	2	8	13304000000	788730000	508940000	767120000	822840000	636340000	638330000	732540000	377900000	462850000	669420000	483710000	643860000	584750000	494050000	688310000	650060000	567520000	329720000	762980000	523630000	513060000	657290000	752060000	548190000	901360000	749520000	697470000	704230000	770630000	572860000	576970000	772060000	747350000	672980000	831650000	832690000	658700000	786370000	704740000	902070000	665450000	635200000	783260000
EIF3E	P60228	P60228	sp|P60228|EIF3E_HUMAN Eukaryotic translation initiation factor 3 subunit E OS=Homo sapiens OX=9606 GN=EIF3E PE=1 SV=1	21	21	13250000000	1035100000	660530000	835660000	1022900000	844170000	617020000	797120000	479690000	609030000	608480000	375130000	579120000	446090000	367570000	593730000	530920000	561320000	264560000	641620000	588250000	377600000	414200000	1004300000	818030000	988010000	981400000	968720000	670700000	667930000	568070000	657040000	662870000	631210000	601200000	647980000	599910000	677570000	600220000	637600000	611230000	667810000	685680000	627790000
AKAP12	Q02952	Q02952	sp|Q02952|AKA12_HUMAN A-kinase anchor protein 12 OS=Homo sapiens OX=9606 GN=AKAP12 PE=1 SV=4	45	45	13240000000	1698700000	1100800000	1200200000	1739900000	1362900000	403360000	429500000	325870000	443720000	300680000	255080000	419890000	221990000	239380000	398360000	425530000	338170000	225120000	601250000	551450000	291130000	267280000	1328400000	1038700000	1246700000	1254700000	1277700000	576090000	498150000	535290000	540660000	477560000	514030000	554020000	458600000	463040000	569480000	535870000	506410000	617030000	588160000	648860000	564290000
TLN1	Q9Y490	Q9Y490	sp|Q9Y490|TLN1_HUMAN Talin-1 OS=Homo sapiens OX=9606 GN=TLN1 PE=1 SV=3	57	64	13234000000	1192600000	700610000	987870000	1251900000	901960000	485010000	675520000	432880000	485510000	437900000	367920000	499720000	425980000	458420000	461680000	533120000	555100000	367600000	669530000	454700000	382620000	506010000	983230000	774880000	1027500000	912900000	932050000	665720000	591070000	748450000	614530000	625870000	690550000	615960000	702740000	686200000	607880000	623230000	717380000	716990000	650200000	594720000	726350000
RDX	P35241	P35241	sp|P35241|RADI_HUMAN Radixin OS=Homo sapiens OX=9606 GN=RDX PE=1 SV=1	17	17	13228000000	361710000	187580000	264670000	340150000	280610000	699780000	928150000	745050000	873110000	888380000	337330000	829820000	484260000	573380000	689300000	863700000	804330000	329990000	764450000	816050000	581360000	585030000	398460000	337880000	407340000	418300000	425700000	754230000	807990000	876480000	858490000	917690000	704900000	779230000	755880000	823350000	703010000	795170000	910380000	793200000	730540000	826390000	874290000
PHPT1	Q9NRX4	Q9NRX4	sp|Q9NRX4|PHP14_HUMAN 14 kDa phosphohistidine phosphatase OS=Homo sapiens OX=9606 GN=PHPT1 PE=1 SV=1	6	6	13200000000	141440000	71522000	93872000	167480000	118170000	814470000	943350000	797930000	850850000	787280000	374940000	749460000	746180000	586770000	847140000	741720000	854400000	500080000	960280000	771670000	544460000	736270000	183030000	103270000	167750000	198080000	185210000	812560000	793490000	1056800000	844170000	880210000	548480000	819870000	993540000	928170000	833280000	832210000	950490000	1272900000	837420000	763470000	878930000
SAE1	Q9UBE0	Q9UBE0	sp|Q9UBE0|SAE1_HUMAN SUMO-activating enzyme subunit 1 OS=Homo sapiens OX=9606 GN=SAE1 PE=1 SV=1	18	18	13182000000	400190000	266190000	399710000	413560000	320310000	658050000	945300000	731070000	730660000	625450000	441070000	747580000	568220000	508580000	664680000	820900000	708340000	419820000	877450000	797600000	581620000	556060000	461060000	384080000	498720000	490300000	455350000	738630000	833990000	885580000	774430000	736040000	674070000	793270000	749140000	697270000	646740000	823560000	799960000	777470000	778470000	849810000	782760000
CDC37	Q16543	Q16543	sp|Q16543|CDC37_HUMAN Hsp90 co-chaperone Cdc37 OS=Homo sapiens OX=9606 GN=CDC37 PE=1 SV=1	16	16	13166000000	947110000	523590000	598160000	867190000	746740000	600590000	697910000	522240000	575130000	523460000	548290000	628390000	560410000	479490000	569900000	521420000	569180000	359540000	692760000	708930000	395880000	529460000	914790000	664390000	856940000	844110000	892730000	747150000	717920000	698000000	787800000	666690000	719180000	566250000	709120000	672550000	731220000	615180000	656580000	783030000	675300000	702420000	644770000
ATP5H	O75947	O75947	sp|O75947|ATP5H_HUMAN ATP synthase subunit d, mitochondrial OS=Homo sapiens OX=9606 GN=ATP5PD PE=1 SV=3	10	10	13111000000	604930000	909940000	404520000	484080000	357380000	456280000	656650000	527740000	592560000	591020000	587680000	691980000	654250000	703650000	678480000	621660000	537570000	411730000	867540000	592250000	601190000	577660000	590840000	988790000	551820000	557590000	487440000	771650000	631120000	646330000	574610000	686990000	882180000	729190000	871280000	933220000	761670000	760660000	698850000	790640000	874800000	660150000	822180000
SRI	P30626	P30626	sp|P30626|SORCN_HUMAN Sorcin OS=Homo sapiens OX=9606 GN=SRI PE=1 SV=1	13	13	13105000000	476530000	354590000	330410000	424840000	322990000	649660000	876360000	564200000	650970000	715890000	585880000	760910000	632140000	580780000	611610000	766450000	642590000	655850000	765690000	562060000	590420000	583760000	496860000	456630000	489280000	589860000	693580000	860950000	898240000	721400000	856580000	776660000	933160000	699290000	770710000	816770000	827950000	806240000	780510000	893400000	877960000	590430000	790170000
ERP29	P30040	P30040	sp|P30040|ERP29_HUMAN Endoplasmic reticulum resident protein 29 OS=Homo sapiens OX=9606 GN=ERP29 PE=1 SV=4	10	10	13091000000	985690000	1135600000	734140000	913510000	698530000	526600000	684660000	531040000	565550000	551650000	360780000	532040000	499600000	462020000	537570000	525220000	514650000	375740000	592610000	463720000	429410000	470460000	1003800000	1363100000	886810000	955180000	863120000	600290000	632300000	693590000	608580000	610460000	616650000	548600000	731010000	699030000	610730000	568550000	658460000	784430000	591820000	497120000	648470000
RPL36	Q9Y3U8	Q9Y3U8	sp|Q9Y3U8|RL36_HUMAN 60S ribosomal protein L36 OS=Homo sapiens OX=9606 GN=RPL36 PE=1 SV=3	6	6	13087000000	1269500000	911950000	1269400000	1250100000	1213000000	471720000	514420000	301490000	455210000	360170000	425010000	584480000	371420000	253280000	450600000	397780000	464270000	285010000	600230000	522080000	324600000	391570000	1291300000	1173400000	1630800000	1314600000	1711200000	560320000	512690000	318210000	565820000	411150000	718670000	519270000	454200000	349750000	564180000	418470000	547820000	458660000	586210000	573910000	413320000
FKBP10	Q96AY3	Q96AY3	sp|Q96AY3|FKB10_HUMAN Peptidyl-prolyl cis-trans isomerase FKBP10 OS=Homo sapiens OX=9606 GN=FKBP10 PE=1 SV=1	17	17	13057000000	379580000	407810000	280130000	299970000	193170000	836610000	862930000	537060000	741870000	684080000	568750000	753030000	610860000	503050000	780700000	704360000	569400000	441860000	865340000	761680000	616570000	658100000	392080000	489130000	438130000	372140000	374540000	908380000	819410000	681160000	827730000	757370000	935830000	767380000	770790000	747790000	849560000	786870000	735170000	916330000	904690000	815410000	866630000
SNRPD3	P62318	P62318	sp|P62318|SMD3_HUMAN Small nuclear ribonucleoprotein Sm D3 OS=Homo sapiens OX=9606 GN=SNRPD3 PE=1 SV=1	6	6	13050000000	800950000	587430000	565280000	836270000	616520000	553480000	806000000	592010000	744000000	743420000	300350000	618730000	424330000	478830000	588620000	819770000	501990000	302950000	652380000	615210000	404280000	497400000	773200000	703370000	660140000	733570000	639020000	677950000	821390000	704660000	845130000	845330000	616520000	714230000	616570000	700700000	605120000	927000000	635380000	793720000	667750000	662740000	564260000
RHOA	P61586	P61586	sp|P61586|RHOA_HUMAN Transforming protein RhoA OS=Homo sapiens OX=9606 GN=RHOA PE=1 SV=1	3	11	13020000000	577650000	351530000	380000000	614940000	471450000	624400000	889340000	621330000	677380000	717070000	364620000	784430000	516300000	429070000	760750000	728950000	683600000	302810000	790440000	712750000	456960000	564550000	647400000	530270000	505870000	696080000	663760000	686940000	832310000	828600000	631610000	745040000	642700000	790210000	720450000	657620000	779220000	747440000	798330000	689600000	778580000	776360000	670150000
HN1	Q9UK76	Q9UK76	sp|Q9UK76|JUPI1_HUMAN Jupiter microtubule associated homolog 1 OS=Homo sapiens OX=9606 GN=JPT1 PE=1 SV=3	8	8	13010000000	669150000	497700000	587340000	604450000	623570000	506260000	940270000	740050000	813150000	750390000	309620000	685440000	445420000	425040000	455650000	629670000	731800000	277110000	658370000	725560000	451870000	482490000	696650000	579760000	684290000	680040000	760970000	609800000	805070000	895800000	852730000	811020000	535350000	722810000	653740000	707040000	486220000	657920000	863120000	680560000	616930000	731580000	733060000
FKBP9	O95302;Q75LS8	O95302	sp|O95302|FKBP9_HUMAN Peptidyl-prolyl cis-trans isomerase FKBP9 OS=Homo sapiens OX=9606 GN=FKBP9 PE=1 SV=2	4	4	12998000000	677640000	864410000	478690000	582750000	472850000	787600000	236910000	572440000	722260000	675640000	386650000	591410000	458230000	494290000	788120000	771750000	546260000	317210000	805210000	807520000	427300000	533160000	0	0	0	0	0	634090000	326700000	0	0	0	0	0	0	0	0	631750000	517400000	0	603820000	633640000	569670000
RPL26	P61254	P61254	sp|P61254|RL26_HUMAN 60S ribosomal protein L26 OS=Homo sapiens OX=9606 GN=RPL26 PE=1 SV=1	1	12	12998000000	1768900000	1073300000	1251500000	1587000000	1364500000	437300000	433760000	300740000	286010000	288800000	320230000	529040000	337780000	320440000	445260000	322820000	359840000	147460000	467860000	277450000	334990000	343050000	1508800000	1308100000	1447900000	1573700000	1583200000	459580000	453920000	377770000	324420000	331040000	759420000	521460000	438250000	486240000	593180000	354620000	501830000	354730000	527170000	404210000	522640000
SMARCA5	O60264	O60264	sp|O60264|SMCA5_HUMAN SWI/SNF-related matrix-associated actin-dependent regulator of chromatin subfamily A member 5 OS=Homo sapiens OX=9606 GN=SMARCA5 PE=1 SV=1	32	46	12974000000	738080000	629600000	641280000	746510000	667390000	891870000	826360000	413240000	499810000	462950000	399940000	745720000	434700000	368110000	983120000	759090000	421620000	254350000	646030000	526030000	439710000	478880000	687820000	780970000	696730000	663930000	708660000	843880000	762440000	587720000	593990000	607920000	749340000	740010000	648290000	689140000	905100000	728250000	620920000	679460000	712840000	604440000	734820000
RPL10A	P62906	P62906	sp|P62906|RL10A_HUMAN 60S ribosomal protein L10a OS=Homo sapiens OX=9606 GN=RPL10A PE=1 SV=2	8	8	12959000000	1437300000	1289200000	1277700000	1289900000	1169300000	380270000	636260000	275200000	351090000	376740000	312830000	394740000	346650000	328270000	565270000	350850000	328870000	170810000	657580000	425790000	255330000	339020000	1242000000	1360600000	1407800000	1130800000	1364200000	484180000	592630000	402110000	418710000	438490000	541240000	503370000	488860000	531170000	636810000	437250000	436800000	530480000	655440000	499700000	397230000
PSMC6	P62333	P62333	sp|P62333|PRS10_HUMAN 26S proteasome regulatory subunit 10B OS=Homo sapiens OX=9606 GN=PSMC6 PE=1 SV=1	22	22	12905000000	673210000	461380000	547450000	769540000	531420000	584360000	882580000	611610000	673620000	608910000	331930000	695220000	492090000	396560000	666970000	698130000	637400000	288860000	839580000	671650000	359570000	482960000	649110000	571880000	550600000	653950000	570890000	637800000	712340000	805940000	709680000	726080000	649990000	755950000	740610000	782210000	666900000	813190000	733270000	647330000	726750000	702280000	660800000
COPA	P53621	P53621	sp|P53621|COPA_HUMAN Coatomer subunit alpha OS=Homo sapiens OX=9606 GN=COPA PE=1 SV=2	43	43	12846000000	508430000	464850000	417930000	550240000	517970000	632770000	907600000	528790000	612660000	509510000	394700000	773900000	502740000	457980000	920790000	729560000	510210000	276600000	926240000	662280000	460850000	579330000	591560000	588770000	591480000	603740000	604400000	765870000	764600000	704710000	672480000	639550000	743280000	768900000	706140000	726300000	852420000	748130000	690300000	654990000	793200000	691260000	722100000
RPS25	P62851	P62851	sp|P62851|RS25_HUMAN 40S ribosomal protein S25 OS=Homo sapiens OX=9606 GN=RPS25 PE=1 SV=1	6	6	12834000000	1278400000	967090000	1277300000	1429200000	725990000	502580000	517900000	367660000	338680000	384870000	448970000	511660000	326920000	323270000	517720000	491780000	354750000	360530000	506130000	465450000	367640000	369290000	1255800000	1035600000	1367500000	1317700000	1598100000	578740000	494270000	528070000	376690000	453400000	708390000	541120000	454110000	496850000	581350000	518640000	435510000	501070000	513740000	512050000	639440000
STOML2	Q9UJZ1	Q9UJZ1	sp|Q9UJZ1|STML2_HUMAN Stomatin-like protein 2, mitochondrial OS=Homo sapiens OX=9606 GN=STOML2 PE=1 SV=1	16	16	12796000000	521760000	637710000	374280000	496060000	438690000	756740000	848620000	518040000	550130000	531150000	482790000	600340000	552270000	553540000	823300000	514280000	518530000	415220000	922300000	739200000	487710000	513410000	445150000	605480000	445870000	473560000	457230000	752520000	759870000	726690000	664560000	744680000	714760000	749640000	955360000	801140000	763600000	629980000	754110000	972670000	765040000	686070000	744060000
RTN4	Q9NQC3	Q9NQC3	sp|Q9NQC3|RTN4_HUMAN Reticulon-4 OS=Homo sapiens OX=9606 GN=RTN4 PE=1 SV=2	27	27	12795000000	668930000	604210000	663610000	689270000	656250000	501300000	870780000	576250000	777840000	700410000	304980000	620270000	413750000	351910000	627390000	646230000	626490000	208820000	680420000	718220000	458500000	429080000	540450000	593470000	579890000	527830000	532280000	585610000	739590000	759870000	784780000	792140000	588970000	655290000	635540000	652770000	586850000	662980000	735470000	683170000	599800000	727770000	666900000
RAB1A	P62820	P62820	sp|P62820|RAB1A_HUMAN Ras-related protein Rab-1A OS=Homo sapiens OX=9606 GN=RAB1A PE=1 SV=3	5	10	12788000000	591160000	246450000	458500000	536490000	440080000	717000000	768220000	503300000	714970000	559660000	458560000	668470000	455440000	536580000	887320000	620010000	703970000	411630000	848850000	680230000	455090000	526470000	604650000	564520000	630090000	640770000	592220000	837430000	661610000	600430000	736290000	636680000	736080000	620060000	653870000	673000000	879620000	635140000	740500000	756000000	805570000	675540000	703400000
CPSF6	Q16630	Q16630	sp|Q16630|CPSF6_HUMAN Cleavage and polyadenylation specificity factor subunit 6 OS=Homo sapiens OX=9606 GN=CPSF6 PE=1 SV=2	14	14	12741000000	489050000	412600000	391150000	421890000	377190000	626010000	724130000	596670000	674640000	582480000	579420000	833710000	558340000	572030000	487450000	654570000	674420000	391930000	725080000	714800000	617580000	635670000	614620000	520550000	594560000	584300000	572760000	815260000	704050000	712200000	772580000	724690000	683220000	862910000	707470000	720670000	714900000	750230000	691890000	645460000	743860000	846690000	695940000
MARS	P56192	P56192	sp|P56192|SYMC_HUMAN Methionine--tRNA ligase, cytoplasmic OS=Homo sapiens OX=9606 GN=MARS1 PE=1 SV=2	28	28	12721000000	998470000	745390000	773380000	1022000000	900210000	659970000	565580000	400890000	577150000	504130000	363800000	491840000	473910000	398650000	604140000	514380000	521440000	287500000	550830000	485210000	392320000	489700000	899070000	848270000	1008000000	930840000	956660000	690840000	556290000	565490000	584520000	540780000	624200000	556920000	644280000	652570000	697140000	582220000	620420000	695180000	635110000	565540000	596200000
DYNLL2	Q96FJ2	Q96FJ2	sp|Q96FJ2|DYL2_HUMAN Dynein light chain 2, cytoplasmic OS=Homo sapiens OX=9606 GN=DYNLL2 PE=1 SV=1	5	7	12682000000	336700000	270400000	180290000	310030000	249580000	671230000	884670000	538500000	851380000	804260000	323350000	821200000	542260000	435370000	741970000	955520000	717690000	291550000	878600000	823530000	474510000	579380000	334840000	286100000	250210000	367070000	335760000	768130000	823710000	663520000	939150000	867820000	584520000	837110000	708490000	641920000	835820000	919140000	836740000	563260000	967060000	913320000	682980000
NUDT21	O43809	O43809	sp|O43809|CPSF5_HUMAN Cleavage and polyadenylation specificity factor subunit 5 OS=Homo sapiens OX=9606 GN=NUDT21 PE=1 SV=1	12	12	12675000000	477270000	531280000	451390000	573350000	493510000	642910000	920330000	566420000	643380000	640940000	445010000	574800000	492430000	487470000	670520000	799100000	562710000	344680000	726930000	585050000	474650000	570390000	501710000	640490000	603540000	605660000	623350000	788270000	861940000	685050000	651800000	721930000	707420000	658950000	689970000	710650000	723110000	802670000	689890000	739690000	757030000	664190000	729420000
PFKM	P08237	P08237	sp|P08237|PFKAM_HUMAN ATP-dependent 6-phosphofructokinase, muscle type OS=Homo sapiens OX=9606 GN=PFKM PE=1 SV=2	24	27	12661000000	222170000	130120000	156480000	246530000	229700000	768290000	835940000	639240000	696110000	705890000	441520000	811510000	444040000	440350000	920620000	873790000	675730000	304750000	1038800000	935090000	517660000	626450000	340830000	270610000	300290000	348590000	351750000	818390000	777960000	779740000	740170000	771530000	781450000	838370000	755240000	656770000	920390000	851950000	745180000	815740000	895690000	925180000	767220000
ALDH18A1	P54886	P54886	sp|P54886|P5CS_HUMAN Delta-1-pyrroline-5-carboxylate synthase OS=Homo sapiens OX=9606 GN=ALDH18A1 PE=1 SV=2	30	30	12658000000	826920000	1227500000	711080000	824560000	683920000	631000000	554580000	382300000	398980000	516870000	400610000	681420000	328700000	434080000	681740000	549970000	459760000	251060000	745880000	510790000	423570000	432420000	778650000	1189600000	815250000	772190000	792410000	731780000	567750000	544140000	466070000	510160000	767590000	672720000	640610000	684720000	715250000	592170000	566870000	668470000	658570000	538450000	709940000
IARS	P41252	P41252	sp|P41252|SYIC_HUMAN Isoleucine--tRNA ligase, cytoplasmic OS=Homo sapiens OX=9606 GN=IARS1 PE=1 SV=2	41	41	12653000000	1027800000	730050000	742360000	1157300000	641680000	590180000	620740000	446320000	442190000	601620000	274080000	508270000	403890000	364640000	675900000	489870000	462970000	219380000	702890000	621990000	447740000	480890000	893140000	733810000	786650000	983330000	812260000	670460000	615110000	594280000	574970000	647870000	660060000	562430000	638050000	602510000	700030000	576490000	601450000	645430000	671890000	600290000	621080000
ZFR	Q96KR1	Q96KR1	sp|Q96KR1|ZFR_HUMAN Zinc finger RNA-binding protein OS=Homo sapiens OX=9606 GN=ZFR PE=1 SV=2	19	19	12616000000	931610000	767710000	694070000	1084200000	777260000	564640000	806830000	454410000	552060000	509220000	301630000	477740000	396210000	452030000	628470000	630780000	491590000	298790000	526790000	442530000	404190000	423370000	654220000	647410000	666800000	513740000	659210000	851420000	846230000	766340000	664240000	755940000	681740000	624170000	668810000	695060000	779440000	733930000	702570000	687280000	631240000	588520000	631300000
RPL18A	Q02543	Q02543	sp|Q02543|RL18A_HUMAN 60S ribosomal protein L18a OS=Homo sapiens OX=9606 GN=RPL18A PE=1 SV=2	10	10	12587000000	1588200000	884660000	1115900000	1428800000	1250800000	485140000	485250000	337150000	287410000	295160000	382800000	401110000	373230000	438140000	508850000	352830000	354930000	299890000	314690000	342190000	310220000	349610000	1423000000	1141300000	1185500000	1433200000	1506700000	611380000	475410000	439890000	357680000	361190000	599100000	623470000	474730000	522060000	593710000	406260000	441010000	545980000	487860000	417380000	428880000
RAB6A	P20340	P20340	sp|P20340|RAB6A_HUMAN Ras-related protein Rab-6A OS=Homo sapiens OX=9606 GN=RAB6A PE=1 SV=3	4	12	12558000000	592410000	537970000	496420000	663480000	528650000	625330000	732770000	449810000	769320000	579840000	390410000	581670000	442580000	480990000	796680000	600500000	562130000	381830000	638560000	710110000	471200000	525260000	703360000	660270000	696620000	671790000	589010000	614070000	573100000	586850000	704690000	600380000	581280000	588860000	546070000	575240000	580170000	526060000	587110000	646250000	482700000	618130000	639950000
KARS	Q15046	Q15046	sp|Q15046|SYK_HUMAN Lysine--tRNA ligase OS=Homo sapiens OX=9606 GN=KARS1 PE=1 SV=3	27	27	12511000000	1019300000	706680000	762300000	878560000	776700000	539050000	633430000	489190000	550520000	504540000	297400000	520320000	355850000	387520000	513060000	555190000	554690000	276350000	663340000	530480000	469630000	526920000	863480000	721750000	892570000	881640000	801470000	629850000	609250000	619860000	628760000	677900000	660130000	604200000	607050000	599670000	602250000	600640000	629150000	716990000	605820000	615510000	686080000
RPS28	P62857	P62857	sp|P62857|RS28_HUMAN 40S ribosomal protein S28 OS=Homo sapiens OX=9606 GN=RPS28 PE=1 SV=1	7	7	12509000000	1104500000	887140000	924000000	1117700000	859230000	488850000	548170000	375400000	524680000	503190000	306790000	444170000	395560000	404650000	481050000	496410000	505000000	250800000	496680000	464440000	412630000	517830000	850240000	1113100000	1116900000	1111600000	1137200000	487910000	476270000	509220000	586780000	619970000	520010000	541880000	597800000	622860000	580280000	577510000	635890000	492280000	478150000	484940000	540580000
CS	O75390	O75390	sp|O75390|CISY_HUMAN Citrate synthase, mitochondrial OS=Homo sapiens OX=9606 GN=CS PE=1 SV=2	13	13	12491000000	673460000	747350000	548850000	592300000	479790000	633610000	708940000	572820000	598480000	593170000	387390000	689500000	461700000	436370000	702690000	602020000	544890000	323010000	709010000	613950000	383640000	487620000	656920000	867790000	697460000	618780000	569460000	752580000	664240000	746760000	630490000	664130000	671410000	680010000	663480000	674600000	756420000	670820000	657610000	650990000	701420000	696760000	707810000
FKBP3	Q00688	Q00688	sp|Q00688|FKBP3_HUMAN Peptidyl-prolyl cis-trans isomerase FKBP3 OS=Homo sapiens OX=9606 GN=FKBP3 PE=1 SV=1	15	15	12470000000	525650000	449860000	356880000	516650000	511920000	508410000	818210000	735690000	689630000	545110000	366890000	592910000	505260000	480780000	609970000	685100000	728400000	373030000	734980000	648360000	482110000	604640000	586730000	470540000	515250000	571600000	553070000	672940000	797650000	746960000	751100000	752360000	585580000	697450000	684640000	736710000	681530000	805800000	719010000	661460000	807100000	752700000	797030000
RPL17	P18621	P18621	sp|P18621|RL17_HUMAN 60S ribosomal protein L17 OS=Homo sapiens OX=9606 GN=RPL17 PE=1 SV=3	11	11	12442000000	1410900000	952530000	1119000000	1428500000	1175300000	463750000	454200000	254960000	347920000	227250000	296600000	560140000	261300000	309660000	619370000	358230000	348330000	200260000	619200000	365010000	312380000	357600000	1314000000	1096200000	1173200000	1491800000	1324600000	576710000	510750000	374950000	370960000	318640000	545160000	519740000	374810000	454250000	636720000	430620000	395090000	470290000	585630000	425340000	471670000
HCFC1	P51610;Q9Y5Z7	P51610	sp|P51610|HCFC1_HUMAN Host cell factor 1 OS=Homo sapiens OX=9606 GN=HCFC1 PE=1 SV=2	38	38	12384000000	521770000	376130000	469790000	501260000	452330000	612400000	636540000	663760000	704760000	603240000	497800000	830670000	486230000	480990000	685530000	610610000	541880000	417530000	777950000	687410000	399480000	425920000	513940000	512410000	628990000	510870000	555790000	696640000	640170000	802630000	702670000	731320000	727530000	736240000	826190000	736580000	695590000	701260000	746150000	769190000	662360000	698770000	779260000
ATP5F1	P24539	P24539	sp|P24539|AT5F1_HUMAN ATP synthase F(0) complex subunit B1, mitochondrial OS=Homo sapiens OX=9606 GN=ATP5PB PE=1 SV=2	9	9	12333000000	348780000	801960000	576980000	345540000	511110000	770150000	586520000	436140000	577940000	430290000	503180000	560300000	476360000	533390000	734240000	585010000	602130000	347300000	712450000	710620000	527510000	655200000	677420000	851030000	547060000	602500000	540590000	751450000	786330000	554400000	774930000	672730000	613150000	796060000	681280000	629260000	803740000	771420000	696150000	473000000	783390000	812770000	665570000
PSMB7	Q99436	Q99436	sp|Q99436|PSB7_HUMAN Proteasome subunit beta type-7 OS=Homo sapiens OX=9606 GN=PSMB7 PE=1 SV=1	8	8	12327000000	423780000	472270000	492870000	631740000	524980000	587650000	767550000	767580000	702880000	670200000	345490000	637730000	547820000	459920000	516480000	647350000	653790000	377350000	631670000	647850000	399110000	420800000	719600000	515530000	757660000	690330000	708630000	664400000	684850000	867780000	728800000	688420000	520460000	670750000	808640000	688310000	553240000	680710000	688420000	822670000	549590000	625780000	779440000
SFXN1	Q9H9B4	Q9H9B4	sp|Q9H9B4|SFXN1_HUMAN Sideroflexin-1 OS=Homo sapiens OX=9606 GN=SFXN1 PE=1 SV=4	16	17	12297000000	272200000	340570000	182080000	158630000	221470000	739000000	944550000	652160000	708850000	596150000	421840000	846800000	495060000	461540000	842390000	768830000	583400000	433710000	734440000	817920000	518420000	556930000	326130000	489440000	330660000	297620000	343450000	772280000	865670000	782810000	754690000	754790000	699550000	815670000	730870000	704030000	824300000	827930000	688980000	755040000	762210000	883520000	660420000
FXR1	P51114	P51114	sp|P51114|FXR1_HUMAN RNA-binding protein FXR1 OS=Homo sapiens OX=9606 GN=FXR1 PE=1 SV=3	16	18	12292000000	794350000	557280000	755230000	966460000	787130000	697670000	581100000	417220000	538270000	561780000	316380000	515820000	364170000	401300000	720820000	433620000	487240000	244360000	759870000	467220000	454710000	469760000	856010000	696700000	836870000	853210000	778360000	714430000	593110000	586920000	556890000	597150000	646280000	606490000	581780000	582370000	720950000	595520000	599170000	617880000	676000000	601440000	667730000
U2AF2	P26368	P26368	sp|P26368|U2AF2_HUMAN Splicing factor U2AF 65 kDa subunit OS=Homo sapiens OX=9606 GN=U2AF2 PE=1 SV=4	13	13	12259000000	707420000	513740000	534140000	596400000	616170000	656300000	722910000	469870000	753650000	554110000	407090000	533830000	375390000	405060000	703210000	595280000	520480000	353710000	752330000	597030000	412240000	478660000	649950000	703730000	721060000	607490000	805190000	725350000	646340000	586080000	761000000	653520000	691050000	559860000	634600000	586400000	695900000	638560000	609780000	726500000	741890000	638090000	659420000
TPM1	P09493	P09493	sp|P09493|TPM1_HUMAN Tropomyosin alpha-1 chain OS=Homo sapiens OX=9606 GN=TPM1 PE=1 SV=2	13	21	12207000000	1340100000	991690000	1121700000	1530700000	1098400000	480980000	369220000	221780000	255100000	255300000	215270000	615110000	291150000	190520000	386910000	569650000	225150000	249030000	678050000	552900000	291510000	276400000	1577400000	1015200000	1383000000	1460400000	1395200000	550040000	396130000	250960000	179080000	243750000	482280000	658660000	372980000	262230000	561640000	579250000	193550000	575160000	782070000	580770000	330510000
MSI1	O43347	O43347	sp|O43347|MSI1H_HUMAN RNA-binding protein Musashi homolog 1 OS=Homo sapiens OX=9606 GN=MSI1 PE=1 SV=1	15	17	12085000000	12662000	11037000	0	8343400	0	647230000	1035600000	655100000	1014000000	839400000	352650000	755440000	513290000	545410000	714510000	859760000	816920000	336570000	1054900000	777210000	485570000	649840000	0	0	0	0	0	788040000	979200000	826750000	988220000	870470000	695210000	790700000	762280000	805820000	882200000	923050000	898460000	673860000	1009000000	871660000	804770000
API5	Q9BZZ5	Q9BZZ5	sp|Q9BZZ5|API5_HUMAN Apoptosis inhibitor 5 OS=Homo sapiens OX=9606 GN=API5 PE=1 SV=3	18	18	12064000000	563410000	346770000	426230000	594290000	389900000	535960000	1031800000	540980000	865330000	677510000	294370000	744030000	335150000	354810000	690580000	685610000	575050000	216130000	612040000	730750000	413760000	439810000	577440000	534010000	610160000	570040000	653330000	639980000	795070000	712920000	823780000	701310000	558790000	689360000	609150000	541650000	677460000	677650000	660140000	534000000	728030000	753140000	587310000
CTPS1	P17812	P17812	sp|P17812|PYRG1_HUMAN CTP synthase 1 OS=Homo sapiens OX=9606 GN=CTPS1 PE=1 SV=2	24	26	12063000000	685570000	438280000	411070000	647150000	574880000	639970000	792300000	405210000	573870000	526560000	393670000	691800000	422380000	330160000	743000000	703740000	574880000	219410000	746920000	688280000	405970000	447550000	604720000	548720000	565760000	650100000	640370000	682240000	631120000	639530000	598290000	642010000	716950000	672740000	636120000	621130000	756030000	721170000	649270000	655450000	765680000	664920000	653130000
PDHB	P11177	P11177	sp|P11177|ODPB_HUMAN Pyruvate dehydrogenase E1 component subunit beta, mitochondrial OS=Homo sapiens OX=9606 GN=PDHB PE=1 SV=3	13	13	12039000000	712610000	873850000	526070000	693150000	583020000	595160000	646470000	461280000	537870000	501460000	422980000	553400000	411410000	442230000	594740000	585530000	485170000	299260000	672900000	496060000	454480000	489700000	698480000	1003000000	645000000	695230000	682310000	698100000	612640000	593010000	607250000	593470000	639850000	600590000	634180000	631800000	641430000	660460000	625090000	524570000	696450000	556520000	653220000
VARS	P26640	P26640	sp|P26640|SYVC_HUMAN Valine--tRNA ligase OS=Homo sapiens OX=9606 GN=VARS1 PE=1 SV=4	32	32	12034000000	927600000	563630000	705210000	1050900000	678850000	496490000	685860000	419620000	468730000	511410000	315520000	571610000	376790000	378440000	615440000	583930000	453960000	236180000	597510000	595900000	389170000	411420000	799720000	638830000	735430000	868250000	749690000	622270000	588490000	584610000	527790000	590160000	600880000	609380000	622090000	592540000	705910000	597720000	600410000	636390000	576490000	618470000	615840000
PPP1R12A	O14974;O60237	O14974	sp|O14974|MYPT1_HUMAN Protein phosphatase 1 regulatory subunit 12A OS=Homo sapiens OX=9606 GN=PPP1R12A PE=1 SV=1	22	22	11997000000	431410000	341310000	401750000	435770000	273690000	49721000	650960000	562770000	491070000	535340000	40222000	806880000	575710000	710590000	1003500000	616940000	613600000	535840000	912860000	604590000	738400000	663580000	920830000	1139600000	1171800000	1420700000	826240000	437540000	402160000	700220000	578720000	535180000	390310000	497080000	369670000	531190000	484080000	425550000	455170000	1007700000	697790000	396960000	814290000
RPL9	P32969	P32969	sp|P32969|RL9_HUMAN 60S ribosomal protein L9 OS=Homo sapiens OX=9606 GN=RPL9P9 PE=1 SV=1	9	9	11943000000	1078000000	761610000	924630000	1216800000	1133500000	370940000	609740000	348800000	498630000	469070000	237450000	454500000	282490000	323420000	551280000	503250000	311810000	166840000	546510000	514070000	298440000	341260000	1011700000	801320000	1074000000	1099800000	1270000000	519150000	530560000	512530000	514120000	571820000	466330000	579050000	508220000	487050000	524880000	514870000	470420000	417060000	492150000	489160000	501880000
ANKLE2	Q86XL3	Q86XL3	sp|Q86XL3|ANKL2_HUMAN Ankyrin repeat and LEM domain-containing protein 2 OS=Homo sapiens OX=9606 GN=ANKLE2 PE=1 SV=4	2	2	11891000000	735580000	1156400000	579180000	782510000	1616400000	490920000	656350000	278250000	318740000	487660000	428590000	860780000	281820000	206830000	627320000	412570000	319000000	145940000	318230000	475940000	402900000	309240000	0	0	0	0	0	0	0	0	0	0	0	0	0	0	0	0	0	0	0	0	0
WARS	P23381	P23381	sp|P23381|SYWC_HUMAN Tryptophan--tRNA ligase, cytoplasmic OS=Homo sapiens OX=9606 GN=WARS1 PE=1 SV=2	23	23	11883000000	964140000	399560000	534950000	946860000	808210000	594120000	672240000	366440000	581870000	590520000	357580000	513590000	342660000	350360000	545560000	556050000	521870000	316640000	643020000	522280000	361950000	392410000	858140000	615760000	667830000	904550000	850600000	632630000	574240000	609230000	601300000	636890000	630170000	619140000	606200000	573930000	602940000	606300000	562720000	607600000	590090000	585370000	561390000
HIST2H3PS2	Q5TEC6	Q5TEC6	sp|Q5TEC6|H37_HUMAN Histone H3-7 OS=Homo sapiens OX=9606 GN=H3-7 PE=1 SV=1	1	1	11868000000	792570000	699460000	286460000	842100000	739510000	569940000	653110000	347670000	507030000	443150000	657820000	882370000	425910000	252540000	696850000	488680000	411060000	94453000	593010000	546060000	466910000	471160000	763260000	865640000	363310000	874660000	915330000	634570000	620600000	468490000	548300000	528770000	1122100000	973890000	641360000	394570000	725750000	537770000	494580000	0	572570000	585580000	689240000
SMARCC2	Q8TAQ2	Q8TAQ2	sp|Q8TAQ2|SMRC2_HUMAN SWI/SNF complex subunit SMARCC2 OS=Homo sapiens OX=9606 GN=SMARCC2 PE=1 SV=1	19	27	11833000000	168210000	160820000	139700000	109300000	99057000	552010000	907410000	643290000	1124800000	802650000	360500000	964440000	440220000	487600000	560710000	706790000	639150000	339470000	708150000	999320000	451340000	468200000	283210000	405770000	362470000	191870000	208140000	734920000	800410000	797090000	909740000	805640000	750720000	683850000	736180000	642240000	603650000	746550000	770630000	707070000	737780000	871210000	743060000
BANF1	O75531	O75531	sp|O75531|BAF_HUMAN Barrier-to-autointegration factor OS=Homo sapiens OX=9606 GN=BANF1 PE=1 SV=1	9	9	11825000000	428200000	444790000	336480000	423550000	440810000	406990000	479600000	413030000	371130000	422790000	714620000	619050000	650120000	762930000	357830000	355810000	667970000	235410000	1001300000	734840000	658070000	899420000	497880000	549960000	463940000	462410000	528750000	513190000	458860000	588750000	438740000	521450000	1139500000	678690000	936100000	908990000	487540000	410680000	833600000	376850000	997500000	738560000	764240000
MYL12A;MYL12B	P19105;O14950	P19105;O14950	sp|P19105|ML12A_HUMAN Myosin regulatory light chain 12A OS=Homo sapiens OX=9606 GN=MYL12A PE=1 SV=2;sp|O14950|ML12B_HUMAN Myosin regulatory light chain 12B OS=Homo sapiens OX=9606 GN=MYL12B PE=1 SV=2	4	9	11760000000	890950000	575080000	747030000	965240000	827340000	465590000	745450000	334540000	636690000	503630000	344270000	400820000	338510000	340170000	636720000	505890000	419240000	214800000	659940000	593160000	280740000	334470000	855770000	676650000	888000000	861000000	886020000	608610000	647010000	518680000	665310000	546970000	603380000	496400000	541270000	526700000	654330000	541970000	547910000	428830000	595060000	596980000	523490000
COPB2	P35606	P35606	sp|P35606|COPB2_HUMAN Coatomer subunit beta OS=Homo sapiens OX=9606 GN=COPB2 PE=1 SV=2	34	34	11753000000	587040000	369880000	485150000	601640000	557230000	659330000	617540000	473490000	550440000	657460000	423140000	544530000	513960000	455820000	579650000	635440000	503330000	269750000	656460000	617230000	455250000	539410000	589740000	522710000	578810000	630120000	656490000	728640000	597690000	590280000	614360000	658060000	754910000	624210000	658840000	719120000	680010000	642480000	606350000	766170000	647530000	574270000	673120000
CORO1C	Q9ULV4;Q6QEF8	Q9ULV4	sp|Q9ULV4|COR1C_HUMAN Coronin-1C OS=Homo sapiens OX=9606 GN=CORO1C PE=1 SV=1	18	18	11732000000	351330000	176740000	287430000	330530000	267020000	633530000	721780000	706620000	641660000	729560000	452490000	710590000	477310000	591680000	487160000	674600000	726740000	408770000	630030000	598950000	575040000	552490000	456230000	324390000	415300000	468400000	450420000	675500000	747380000	844400000	780810000	857160000	657300000	722810000	695800000	716880000	642050000	751440000	765300000	729050000	679310000	684040000	748350000
NACA	E9PAV3;Q13765;Q9BZK3	E9PAV3;Q13765	sp|E9PAV3|NACAM_HUMAN Nascent polypeptide-associated complex subunit alpha, muscle-specific form OS=Homo sapiens OX=9606 GN=NACA PE=1 SV=1;sp|Q13765|NACA_HUMAN Nascent polypeptide-associated complex subunit alpha OS=Homo sapiens OX=9606 GN=NACA PE=1 SV=1	7	7	11713000000	996820000	648820000	848240000	987830000	791770000	443790000	622980000	379060000	540310000	471130000	276710000	482230000	382490000	342860000	481190000	556230000	454570000	220750000	456720000	556100000	329140000	443490000	988250000	758620000	1079600000	1036700000	951420000	491480000	643950000	472590000	613840000	559080000	400810000	591240000	580910000	527740000	540280000	580310000	571790000	390190000	451970000	610390000	384750000
FUBP3	Q96I24	Q96I24	sp|Q96I24|FUBP3_HUMAN Far upstream element-binding protein 3 OS=Homo sapiens OX=9606 GN=FUBP3 PE=1 SV=2	24	24	11654000000	606760000	466020000	443820000	489750000	379640000	561310000	651510000	614280000	496210000	663700000	385960000	599620000	419390000	517170000	655510000	530590000	445480000	334060000	673090000	610460000	573600000	535700000	602580000	603650000	578620000	539410000	537290000	669660000	594770000	692490000	600370000	690970000	747570000	643900000	699490000	787840000	589190000	618670000	667020000	703240000	702010000	603700000	672300000
UBE2I	P63279	P63279	sp|P63279|UBC9_HUMAN SUMO-conjugating enzyme UBC9 OS=Homo sapiens OX=9606 GN=UBE2I PE=1 SV=1	10	10	11556000000	428100000	370390000	344240000	549380000	422650000	627100000	905570000	602310000	676010000	594950000	284030000	492930000	406000000	394260000	693320000	652860000	571890000	319370000	753920000	555850000	438990000	471770000	461920000	426650000	418540000	506630000	535120000	694060000	755690000	628190000	694270000	642970000	575210000	513320000	698340000	628220000	837900000	649980000	661000000	719990000	690170000	560160000	676430000
SOD1	P00441	P00441	sp|P00441|SODC_HUMAN Superoxide dismutase [Cu-Zn] OS=Homo sapiens OX=9606 GN=SOD1 PE=1 SV=2	9	9	11545000000	404140000	224780000	247030000	368880000	292920000	470790000	771910000	751790000	976970000	761310000	305180000	664950000	481410000	436130000	529140000	627820000	670460000	356670000	609170000	697470000	467850000	428380000	338960000	183940000	256130000	295810000	322670000	500850000	550720000	856490000	638840000	1009000000	519780000	656540000	634290000	626400000	454160000	545590000	711850000	669270000	527800000	595660000	607980000
HK1	P19367;Q2TB90	P19367	sp|P19367|HXK1_HUMAN Hexokinase-1 OS=Homo sapiens OX=9606 GN=HK1 PE=1 SV=3	38	42	11543000000	1165600000	1385700000	1064700000	1132900000	1007100000	295220000	542550000	326300000	296940000	353620000	192120000	458560000	310650000	256310000	504760000	297480000	389110000	164690000	365890000	451100000	267120000	314700000	1047300000	1299800000	1032200000	1044500000	993550000	493500000	508740000	496370000	425310000	478090000	421760000	473840000	518250000	449470000	512810000	407200000	470240000	477590000	446130000	487950000	467430000
EEF1B2	P24534	P24534	sp|P24534|EF1B_HUMAN Elongation factor 1-beta OS=Homo sapiens OX=9606 GN=EEF1B2 PE=1 SV=3	8	8	11538000000	904660000	550570000	757840000	955870000	828480000	455380000	634900000	397860000	463030000	447340000	320930000	446920000	380130000	365150000	495780000	460920000	440570000	307340000	648800000	508380000	340960000	426140000	904790000	671240000	1067900000	961980000	1068300000	504820000	512320000	471870000	501290000	493170000	505310000	475860000	554870000	561980000	544120000	474480000	504740000	612930000	643630000	523510000	516930000
SF3A3	Q12874	Q12874	sp|Q12874|SF3A3_HUMAN Splicing factor 3A subunit 3 OS=Homo sapiens OX=9606 GN=SF3A3 PE=1 SV=1	19	19	11490000000	531930000	482520000	380190000	513750000	423740000	545350000	636840000	612280000	500870000	648820000	372240000	701800000	613550000	421330000	491600000	590520000	536840000	351330000	622690000	560450000	524030000	426980000	568520000	679500000	617620000	549410000	602350000	603150000	659340000	676150000	695960000	648720000	636380000	671260000	680960000	640930000	558140000	618610000	648760000	665360000	600580000	656030000	676650000
PSMD3	O43242	O43242	sp|O43242|PSMD3_HUMAN 26S proteasome non-ATPase regulatory subunit 3 OS=Homo sapiens OX=9606 GN=PSMD3 PE=1 SV=2	26	26	11481000000	671200000	391920000	429250000	525590000	483910000	533650000	773330000	381570000	580400000	659840000	337020000	627070000	291570000	425650000	747210000	682810000	621450000	207410000	782800000	559620000	351730000	415700000	589860000	474260000	627230000	564230000	576320000	616690000	660040000	493560000	592750000	621480000	689010000	592220000	572720000	673000000	738350000	642220000	647820000	660140000	696910000	560080000	589960000
CALD1	Q05682;REV__O75334	Q05682	sp|Q05682|CALD1_HUMAN Caldesmon OS=Homo sapiens OX=9606 GN=CALD1 PE=1 SV=3	27	28	11451000000	2029300000	1147800000	1631600000	1832300000	1516900000	241630000	204970000	115490000	171870000	250280000	107290000	289840000	119970000	148830000	210340000	230720000	195110000	153370000	275950000	281150000	129990000	166410000	1928000000	1154200000	1933700000	1724100000	1633200000	286100000	254290000	219480000	258100000	313260000	236470000	342900000	272440000	275920000	265740000	274370000	283930000	332700000	270930000	293610000	258460000
UGGT1	Q9NYU2;Q9NYU1	Q9NYU2	sp|Q9NYU2|UGGG1_HUMAN UDP-glucose:glycoprotein glucosyltransferase 1 OS=Homo sapiens OX=9606 GN=UGGT1 PE=1 SV=3	38	38	11438000000	345960000	434650000	236650000	411440000	141400000	604120000	772620000	539730000	734670000	598630000	297410000	690880000	488380000	487620000	594250000	683420000	652480000	295040000	691380000	663390000	448360000	625780000	488600000	538000000	395660000	431190000	344080000	673040000	695220000	695850000	717740000	683640000	644870000	702380000	689620000	701310000	640460000	676310000	717000000	704260000	659650000	690820000	663610000
OTUB1	Q96FW1	Q96FW1	sp|Q96FW1|OTUB1_HUMAN Ubiquitin thioesterase OTUB1 OS=Homo sapiens OX=9606 GN=OTUB1 PE=1 SV=2	13	13	11409000000	462780000	270870000	371610000	435850000	469510000	616730000	776700000	476120000	798370000	593510000	370420000	549880000	430610000	358450000	607620000	660200000	606700000	247680000	741220000	755820000	355160000	453580000	502170000	373300000	489190000	488320000	583750000	707440000	712840000	609070000	834290000	691040000	624880000	601370000	550270000	573070000	685690000	682110000	691470000	592160000	687020000	729090000	610940000
GLDC	P23378	P23378	sp|P23378|GCSP_HUMAN Glycine dehydrogenase (decarboxylating), mitochondrial OS=Homo sapiens OX=9606 GN=GLDC PE=1 SV=2	30	30	11356000000	500680000	720670000	364480000	424540000	238920000	649510000	844850000	338270000	651370000	549570000	296310000	744370000	331540000	448320000	577030000	565520000	446910000	401940000	637460000	707880000	442850000	472820000	526030000	769670000	521190000	432500000	432140000	644130000	669000000	489360000	578530000	592520000	692090000	709820000	647500000	633870000	573370000	664770000	607030000	799820000	620890000	677840000	608000000
PCNP	Q8WW12	Q8WW12	sp|Q8WW12|PCNP_HUMAN PEST proteolytic signal-containing nuclear protein OS=Homo sapiens OX=9606 GN=PCNP PE=1 SV=2	6	6	11316000000	655970000	415830000	420940000	524050000	578840000	530520000	698130000	546960000	627530000	571400000	333760000	607240000	349020000	465680000	534600000	606150000	459450000	297600000	565190000	591170000	456340000	479600000	702300000	496590000	671640000	630060000	666770000	582040000	614340000	644550000	645780000	623460000	574690000	612170000	598510000	683350000	552220000	626040000	668690000	699320000	544580000	582990000	649490000
RPS26;RPS26P11	P62854;Q5JNZ5	P62854;Q5JNZ5	sp|P62854|RS26_HUMAN 40S ribosomal protein S26 OS=Homo sapiens OX=9606 GN=RPS26 PE=1 SV=3;sp|Q5JNZ5|RS26L_HUMAN Putative 40S ribosomal protein S26-like 1 OS=Homo sapiens OX=9606 GN=RPS26P11 PE=5 SV=1	3	3	11284000000	954200000	650890000	818660000	904290000	843600000	457490000	505000000	391650000	452830000	442190000	329770000	446540000	381890000	338900000	491310000	481490000	393070000	281860000	455840000	538960000	306980000	416950000	908550000	976040000	800390000	975980000	835010000	611130000	625060000	504380000	492560000	518070000	431100000	548350000	507640000	453550000	522470000	753130000	393630000	603960000	525530000	602380000	458890000
ERLIN2	O94905	O94905	sp|O94905|ERLN2_HUMAN Erlin-2 OS=Homo sapiens OX=9606 GN=ERLIN2 PE=1 SV=1	14	17	11282000000	253800000	360310000	230550000	246980000	200580000	569200000	692430000	508690000	600120000	693180000	484270000	674100000	464770000	454650000	728410000	749150000	631610000	378980000	690050000	701960000	374990000	593550000	387760000	499840000	382660000	341180000	372000000	737070000	718980000	600600000	734570000	725340000	690030000	624170000	658910000	662230000	722600000	756740000	716370000	724850000	685160000	694290000	695280000
GCN1L1	Q92616	Q92616	sp|Q92616|GCN1_HUMAN eIF-2-alpha kinase activator GCN1 OS=Homo sapiens OX=9606 GN=GCN1 PE=1 SV=7	84	84	11255000000	1053000000	539970000	607360000	1072900000	885580000	478600000	557980000	300310000	387330000	371970000	314550000	596030000	281430000	347700000	519630000	415720000	475270000	215690000	649440000	568130000	283250000	333360000	791660000	578910000	683620000	734020000	727990000	591040000	550510000	525210000	495410000	557570000	573590000	591940000	621240000	568990000	621570000	528270000	543600000	549090000	572420000	616320000	571040000
RAB10	P61026	P61026	sp|P61026|RAB10_HUMAN Ras-related protein Rab-10 OS=Homo sapiens OX=9606 GN=RAB10 PE=1 SV=1	5	6	11237000000	529710000	345820000	385700000	484630000	425430000	596070000	616950000	461700000	556980000	544920000	399800000	483370000	493990000	503710000	682660000	531090000	589440000	425900000	611580000	522660000	518900000	526120000	556780000	416950000	482780000	553510000	584760000	687610000	596250000	638620000	614520000	601030000	629270000	619290000	694040000	817460000	708940000	648020000	687890000	678100000	595930000	586270000	752350000
SLC3A2	P08195	P08195	sp|P08195|4F2_HUMAN 4F2 cell-surface antigen heavy chain OS=Homo sapiens OX=9606 GN=SLC3A2 PE=1 SV=3	22	22	11134000000	2223700000	1154600000	1438100000	2382000000	1520400000	193550000	124320000	189770000	116290000	101610000	71139000	126510000	132980000	100290000	195660000	145260000	195310000	58233000	208490000	143950000	136220000	175900000	2115600000	1337000000	1565400000	2154500000	1510100000	279060000	153530000	258430000	178010000	188950000	217890000	193690000	234890000	205700000	267540000	199130000	256110000	206180000	259260000	205130000	233350000
PSMA3	P25788	P25788	sp|P25788|PSA3_HUMAN Proteasome subunit alpha type-3 OS=Homo sapiens OX=9606 GN=PSMA3 PE=1 SV=2	14	14	11095000000	572860000	466630000	422370000	594280000	497520000	451850000	725700000	570460000	612040000	612880000	293920000	581450000	416960000	336820000	468320000	643790000	505460000	227160000	636740000	616470000	417940000	423730000	613320000	572910000	592370000	610890000	668370000	522830000	648810000	621590000	673250000	600290000	603190000	589450000	566770000	574370000	497800000	691210000	547660000	656730000	605210000	607790000	616230000
COPB1	P53618	P53618	sp|P53618|COPB_HUMAN Coatomer subunit beta OS=Homo sapiens OX=9606 GN=COPB1 PE=1 SV=3	26	26	11085000000	600890000	372730000	441680000	629160000	378490000	445810000	556500000	395580000	537920000	526870000	241950000	482280000	364950000	365050000	990740000	526960000	529480000	215610000	1219200000	611460000	260490000	391430000	585330000	559810000	660440000	618560000	585250000	620400000	616460000	517630000	530740000	586460000	551160000	592630000	551670000	625190000	623810000	576420000	580410000	482190000	639020000	626780000	597670000
ATXN10	Q9UBB4	Q9UBB4	sp|Q9UBB4|ATX10_HUMAN Ataxin-10 OS=Homo sapiens OX=9606 GN=ATXN10 PE=1 SV=1	21	21	11055000000	259060000	159710000	191160000	236950000	202630000	540110000	866280000	562580000	758130000	696060000	393670000	569910000	544870000	557210000	551350000	643830000	657820000	416930000	606890000	610640000	441620000	587920000	319810000	252280000	284480000	313610000	298110000	652310000	713800000	711260000	791160000	707160000	676010000	687580000	724120000	800120000	657060000	717110000	708300000	724160000	624850000	739370000	689020000
ACTR1A	P61163	P61163	sp|P61163|ACTZ_HUMAN Alpha-centractin OS=Homo sapiens OX=9606 GN=ACTR1A PE=1 SV=1	6	12	11053000000	321420000	235140000	239190000	328280000	319930000	541850000	768250000	585940000	693560000	616790000	360640000	645220000	449210000	414360000	583800000	716430000	629760000	271260000	680010000	745420000	435590000	470840000	323290000	308730000	336990000	359760000	402560000	645780000	710020000	729210000	702770000	712480000	639510000	692130000	627220000	664810000	628220000	749010000	733360000	484850000	667470000	784820000	593720000
CBX1	P83916	P83916	sp|P83916|CBX1_HUMAN Chromobox protein homolog 1 OS=Homo sapiens OX=9606 GN=CBX1 PE=1 SV=1	10	11	10972000000	314430000	248030000	240620000	255140000	294070000	514070000	622880000	720380000	649610000	643800000	367860000	708910000	515220000	508330000	456960000	584910000	602900000	357840000	608480000	699780000	473560000	584590000	399230000	361900000	411850000	435750000	512700000	534490000	593980000	665980000	614370000	606820000	591900000	670890000	638480000	685070000	555780000	599540000	645220000	640380000	541120000	651220000	606340000
UBAP2L	Q14157	Q14157	sp|Q14157|UBP2L_HUMAN Ubiquitin-associated protein 2-like OS=Homo sapiens OX=9606 GN=UBAP2L PE=1 SV=2	24	24	10957000000	844400000	694050000	898050000	830930000	717110000	471740000	530290000	399350000	423890000	349510000	265990000	438250000	359770000	355280000	298130000	310780000	559700000	383610000	485770000	461090000	355030000	523990000	757490000	699160000	826320000	791590000	795440000	524670000	502950000	603820000	603690000	550820000	544730000	462600000	599830000	584150000	431350000	489580000	597480000	711950000	546390000	511120000	587320000
RRM1	P23921	P23921	sp|P23921|RIR1_HUMAN Ribonucleoside-diphosphate reductase large subunit OS=Homo sapiens OX=9606 GN=RRM1 PE=1 SV=1	27	27	10863000000	461300000	217380000	281290000	383370000	328820000	589350000	701990000	456200000	476870000	570230000	441090000	692300000	408340000	459640000	622770000	663400000	427800000	291950000	744640000	619480000	498280000	526620000	346290000	296410000	321960000	350080000	374140000	709440000	604010000	586560000	546410000	634240000	723850000	760820000	616830000	724900000	674800000	642650000	624210000	696130000	635400000	675370000	697770000
ACTL6A	O96019;O94805	O96019	sp|O96019|ACL6A_HUMAN Actin-like protein 6A OS=Homo sapiens OX=9606 GN=ACTL6A PE=1 SV=1	17	17	10808000000	400210000	241510000	266950000	331380000	300780000	551200000	783620000	555850000	690950000	684040000	316500000	755420000	316200000	460590000	566260000	623040000	569420000	370220000	573180000	559020000	387940000	503530000	414270000	424730000	393620000	398410000	359070000	660580000	589590000	686370000	657860000	668820000	511490000	679500000	594010000	627970000	606800000	602930000	716980000	667260000	653020000	591520000	689480000
CALU	O43852	O43852	sp|O43852|CALU_HUMAN Calumenin OS=Homo sapiens OX=9606 GN=CALU PE=1 SV=2	11	11	10784000000	418010000	522650000	461460000	552300000	374190000	500930000	798680000	393020000	733480000	523070000	332520000	513680000	362680000	359170000	579290000	552600000	457420000	242630000	667850000	664720000	358970000	414340000	542650000	657000000	521770000	522710000	472280000	633700000	665360000	500980000	655400000	607040000	624750000	616850000	531550000	567890000	598290000	568300000	569600000	636140000	617830000	669490000	577280000
CTNND1	O60716	O60716	sp|O60716|CTND1_HUMAN Catenin delta-1 OS=Homo sapiens OX=9606 GN=CTNND1 PE=1 SV=1	28	28	10775000000	790700000	566340000	516270000	830150000	440140000	412270000	576340000	508490000	518150000	528000000	214820000	565380000	389570000	276170000	463600000	510000000	490460000	191910000	580880000	553770000	398660000	453230000	691040000	603300000	671180000	644630000	685310000	560530000	561870000	576240000	593780000	561660000	528730000	590590000	577500000	545400000	535760000	537800000	529170000	494970000	533860000	568410000	556280000
ATXN2L	Q8WWM7	Q8WWM7	sp|Q8WWM7|ATX2L_HUMAN Ataxin-2-like protein OS=Homo sapiens OX=9606 GN=ATXN2L PE=1 SV=2	24	24	10769000000	748100000	606960000	686420000	727830000	604990000	483370000	556370000	398050000	519280000	480410000	346260000	384530000	380870000	380460000	430500000	350970000	482800000	279850000	543360000	513220000	414220000	449710000	657450000	628270000	762160000	700180000	689100000	552320000	494770000	552920000	558690000	558700000	651690000	434610000	559840000	642450000	531490000	513050000	562420000	659670000	539410000	568570000	622380000
APMAP	Q9HDC9	Q9HDC9	sp|Q9HDC9|APMAP_HUMAN Adipocyte plasma membrane-associated protein OS=Homo sapiens OX=9606 GN=APMAP PE=1 SV=2	17	17	10753000000	230790000	197870000	168670000	248030000	257320000	698810000	904490000	488430000	627600000	498960000	340050000	761840000	439940000	340670000	792410000	704980000	468530000	278600000	698290000	723150000	426200000	457640000	307830000	367250000	342580000	311370000	357040000	792060000	760260000	577530000	693040000	672250000	591100000	650330000	556310000	579590000	828380000	710600000	606290000	555620000	659840000	779840000	612270000
CDK1	P06493;Q96Q40;O94921;Q07002	P06493	sp|P06493|CDK1_HUMAN Cyclin-dependent kinase 1 OS=Homo sapiens OX=9606 GN=CDK1 PE=1 SV=3	13	15	10739000000	512390000	265940000	432360000	586020000	445950000	510250000	663150000	386850000	460250000	477200000	368690000	614660000	525590000	440050000	770730000	480290000	473670000	276220000	746230000	444840000	411280000	445990000	568900000	381270000	534510000	524500000	484240000	606310000	570900000	527010000	519820000	535500000	569620000	572930000	624480000	648060000	703940000	562010000	574670000	605920000	626060000	537500000	602800000
PFN2	P35080	P35080	sp|P35080|PROF2_HUMAN Profilin-2 OS=Homo sapiens OX=9606 GN=PFN2 PE=1 SV=3	6	6	10715000000	178030000	107510000	134790000	189930000	190580000	653200000	684410000	693680000	590430000	679190000	425410000	628420000	481020000	538050000	536950000	670950000	669190000	380820000	648240000	467050000	550720000	615990000	210630000	133570000	210150000	222380000	275080000	759140000	765950000	864010000	752070000	756590000	764730000	595260000	683800000	753270000	560500000	694040000	849550000	791000000	642580000	536270000	711890000
VAT1	Q99536	Q99536	sp|Q99536|VAT1_HUMAN Synaptic vesicle membrane protein VAT-1 homolog OS=Homo sapiens OX=9606 GN=VAT1 PE=1 SV=2	14	14	10673000000	735220000	460960000	601840000	765320000	617790000	375290000	644990000	526360000	532800000	489940000	295900000	461940000	386850000	349130000	501670000	424090000	459950000	279790000	552810000	552390000	272080000	385730000	700790000	588430000	661640000	698300000	746440000	572890000	624680000	591460000	603660000	538730000	565230000	582530000	509220000	513630000	582880000	572180000	557100000	499830000	548470000	623150000	419810000
PSMD4	P55036	P55036	sp|P55036|PSMD4_HUMAN 26S proteasome non-ATPase regulatory subunit 4 OS=Homo sapiens OX=9606 GN=PSMD4 PE=1 SV=1	10	12	10647000000	588970000	359530000	316000000	634830000	269860000	502090000	572780000	500460000	631590000	693700000	357310000	505350000	423020000	418230000	436640000	651140000	505970000	300030000	571630000	566700000	388670000	452210000	605300000	527030000	609000000	542730000	624430000	590180000	559110000	608670000	601820000	591260000	602590000	580980000	606740000	615720000	486600000	553270000	560810000	604050000	559910000	578130000	655530000
VDAC3	Q9Y277	Q9Y277	sp|Q9Y277|VDAC3_HUMAN Voltage-dependent anion-selective channel protein 3 OS=Homo sapiens OX=9606 GN=VDAC3 PE=1 SV=1	11	11	10646000000	302600000	296750000	210070000	274800000	194610000	619750000	718070000	503530000	587350000	609500000	354250000	576580000	426530000	475340000	693590000	689170000	472640000	283460000	704850000	722860000	428600000	500760000	346910000	374700000	343080000	280890000	362210000	701200000	610790000	586750000	721670000	652660000	695280000	607870000	620760000	650470000	741040000	704360000	609940000	595990000	654860000	742720000	635310000
EIF4G2	P78344	P78344	sp|P78344|IF4G2_HUMAN Eukaryotic translation initiation factor 4 gamma 2 OS=Homo sapiens OX=9606 GN=EIF4G2 PE=1 SV=1	32	32	10603000000	596370000	239680000	479300000	690300000	540730000	589030000	656270000	417350000	500640000	515690000	374680000	459780000	291480000	368030000	628030000	458150000	498510000	404010000	532770000	493760000	413670000	454790000	576980000	476820000	636540000	625060000	610050000	637740000	552580000	543360000	576480000	557810000	665670000	506750000	569300000	668160000	625600000	544390000	575450000	635650000	560700000	511370000	625890000
U2AF1;U2AF1L4	Q01081;Q8WU68	Q01081;Q8WU68	sp|Q01081|U2AF1_HUMAN Splicing factor U2AF 35 kDa subunit OS=Homo sapiens OX=9606 GN=U2AF1 PE=1 SV=3;sp|Q8WU68|U2AF4_HUMAN Splicing factor U2AF 26 kDa subunit OS=Homo sapiens OX=9606 GN=U2AF1L4 PE=1 SV=2	8	8	10545000000	433380000	298940000	287690000	427380000	360100000	578120000	660010000	345940000	531930000	329360000	660200000	451600000	462880000	567380000	616250000	522670000	409780000	239920000	725500000	616620000	452270000	566770000	575850000	566570000	566240000	581380000	580850000	751200000	694350000	401420000	654420000	557180000	598060000	534220000	478010000	512080000	795300000	604220000	564300000	407980000	797620000	701570000	444000000
CTBP2	P56545	P56545	sp|P56545|CTBP2_HUMAN C-terminal-binding protein 2 OS=Homo sapiens OX=9606 GN=CTBP2 PE=1 SV=1	9	15	10535000000	635160000	505640000	493280000	553810000	494690000	523590000	625220000	459290000	486690000	512970000	344840000	439630000	408560000	351880000	647070000	509350000	457280000	252740000	560500000	454810000	367030000	450750000	581380000	572970000	559970000	583420000	597580000	670300000	622320000	513020000	582810000	562710000	552600000	527770000	519180000	522430000	695920000	577390000	570050000	507800000	590760000	546340000	582400000
DCTN1	Q14203	Q14203	sp|Q14203|DCTN1_HUMAN Dynactin subunit 1 OS=Homo sapiens OX=9606 GN=DCTN1 PE=1 SV=3	41	41	10518000000	152510000	158480000	104670000	166670000	107330000	580110000	891620000	626700000	798840000	669390000	380880000	554540000	391750000	365900000	555060000	765940000	607530000	292540000	860970000	760160000	345720000	380560000	239590000	230910000	227290000	295770000	162350000	619310000	679970000	794050000	810120000	750520000	681440000	598460000	605550000	590870000	596750000	699090000	724340000	558750000	752900000	727860000	626390000
RANBP2	P49792;P0DJD0;P0DJD1;Q05823	P49792	sp|P49792|RBP2_HUMAN E3 SUMO-protein ligase RanBP2 OS=Homo sapiens OX=9606 GN=RANBP2 PE=1 SV=2	41	64	10431000000	886380000	1173400000	855660000	892610000	736950000	415880000	497000000	301090000	437080000	310580000	231800000	280500000	263290000	285810000	518900000	225790000	267910000	187300000	558360000	414020000	284260000	406730000	674440000	997440000	751510000	692440000	679200000	582280000	503200000	459660000	463790000	455110000	517290000	463980000	491720000	484680000	587740000	436170000	453320000	517050000	533610000	519910000	568640000
USP7	Q93009	Q93009	sp|Q93009|UBP7_HUMAN Ubiquitin carboxyl-terminal hydrolase 7 OS=Homo sapiens OX=9606 GN=USP7 PE=1 SV=2	38	38	10413000000	541140000	375900000	467750000	508370000	450070000	410210000	624070000	433930000	511110000	535390000	434470000	560650000	346590000	371170000	633030000	555870000	480800000	274860000	570230000	497280000	379820000	450230000	488240000	469490000	514610000	505940000	459620000	522670000	522200000	533630000	541290000	572750000	597390000	593800000	539270000	556150000	595270000	532010000	555810000	595230000	517640000	569620000	541880000
PPP2CA	P67775	P67775	sp|P67775|PP2AA_HUMAN Serine/threonine-protein phosphatase 2A catalytic subunit alpha isoform OS=Homo sapiens OX=9606 GN=PPP2CA PE=1 SV=1	2	15	10393000000	558010000	383040000	409750000	539260000	375920000	443000000	709140000	377030000	599180000	554650000	227420000	621650000	374600000	354060000	483470000	620170000	523130000	173660000	684840000	619690000	323370000	437800000	560860000	449030000	504350000	527530000	526410000	521100000	640240000	470880000	623780000	547750000	466140000	582490000	506080000	545800000	559920000	586810000	576880000	397750000	631660000	615450000	522490000
PFDN2	Q9UHV9	Q9UHV9	sp|Q9UHV9|PFD2_HUMAN Prefoldin subunit 2 OS=Homo sapiens OX=9606 GN=PFDN2 PE=1 SV=1	9	9	10370000000	392000000	287460000	267280000	408450000	267970000	374530000	606720000	623480000	604910000	596280000	387240000	703810000	457940000	429970000	540320000	550210000	490890000	298070000	637740000	661460000	299890000	483460000	459420000	418060000	387010000	438520000	426130000	526310000	601130000	664880000	657360000	658430000	586230000	626010000	616850000	574570000	571690000	645300000	668950000	588820000	614090000	717540000	592440000
GDI1	P31150	P31150	sp|P31150|GDIA_HUMAN Rab GDP dissociation inhibitor alpha OS=Homo sapiens OX=9606 GN=GDI1 PE=1 SV=2	21	21	10343000000	150340000	53109000	93382000	169710000	108420000	468620000	737390000	839530000	930860000	786940000	262350000	524210000	466110000	363950000	513400000	633950000	757090000	273860000	544330000	788240000	414130000	463450000	232760000	116550000	160740000	238500000	226090000	548960000	718150000	954390000	890710000	825050000	546210000	596530000	648640000	594940000	548550000	618300000	887920000	611500000	594220000	762250000	643000000
PSMB1	P20618	P20618	sp|P20618|PSB1_HUMAN Proteasome subunit beta type-1 OS=Homo sapiens OX=9606 GN=PSMB1 PE=1 SV=2	11	11	10336000000	591930000	534630000	490400000	656800000	539940000	456540000	757730000	425010000	674560000	535520000	225300000	435950000	311110000	265320000	520530000	606240000	424460000	156930000	477200000	636030000	233710000	380380000	608090000	559310000	543430000	611600000	690030000	504000000	656590000	638030000	641870000	544870000	419630000	514290000	461480000	450790000	554930000	593910000	501050000	394620000	575810000	657930000	477040000
LTA4H	P09960	P09960	sp|P09960|LKHA4_HUMAN Leukotriene A-4 hydrolase OS=Homo sapiens OX=9606 GN=LTA4H PE=1 SV=2	27	27	10331000000	916330000	484540000	714800000	1034500000	701140000	356970000	611000000	383300000	505350000	463920000	206860000	470970000	251030000	258680000	422220000	442810000	361800000	192820000	441200000	539470000	262540000	308770000	800850000	677000000	810880000	819010000	759020000	439870000	496150000	504050000	542400000	510150000	468970000	523380000	430990000	459890000	467540000	499760000	445990000	531860000	458170000	507150000	467260000
ARPC3	O15145	O15145	sp|O15145|ARPC3_HUMAN Actin-related protein 2/3 complex subunit 3 OS=Homo sapiens OX=9606 GN=ARPC3 PE=1 SV=3	8	8	10329000000	564930000	375380000	402980000	551580000	423430000	505440000	396250000	407130000	563740000	543960000	388850000	585060000	359220000	382630000	597760000	522810000	503430000	246480000	578020000	527730000	425580000	476240000	530290000	485190000	502660000	532660000	494110000	531720000	584340000	560390000	650850000	621360000	541000000	625510000	527960000	617280000	619450000	587680000	591240000	533000000	570710000	568620000	619560000
EIF3L	Q9Y262	Q9Y262	sp|Q9Y262|EIF3L_HUMAN Eukaryotic translation initiation factor 3 subunit L OS=Homo sapiens OX=9606 GN=EIF3L PE=1 SV=1	23	23	10324000000	747900000	581070000	674740000	780350000	677380000	409380000	564200000	315910000	510550000	460960000	298750000	449350000	294170000	294010000	506790000	427110000	391510000	229720000	481010000	510360000	336410000	382150000	742720000	663020000	766240000	748970000	739200000	539230000	520270000	418400000	530100000	534240000	562270000	469230000	432170000	452880000	557860000	535970000	482900000	523720000	528400000	534490000	510520000
FH	P07954	P07954	sp|P07954|FUMH_HUMAN Fumarate hydratase, mitochondrial OS=Homo sapiens OX=9606 GN=FH PE=1 SV=3	20	20	10319000000	314710000	282350000	314660000	280050000	219670000	542920000	669820000	436650000	646070000	530870000	466980000	503020000	500110000	471470000	515410000	529500000	617110000	463280000	640760000	486640000	353840000	532710000	365130000	471990000	355340000	390790000	350610000	562740000	618940000	636410000	647870000	622740000	593090000	626700000	591660000	600760000	677020000	650440000	595520000	657530000	663450000	705320000	601810000
SF1	Q15637	Q15637	sp|Q15637|SF01_HUMAN Splicing factor 1 OS=Homo sapiens OX=9606 GN=SF1 PE=1 SV=4	15	15	10286000000	488120000	359990000	454740000	507840000	516010000	526270000	576370000	431050000	485550000	536230000	246430000	510920000	337930000	306550000	506770000	557170000	523040000	283370000	669420000	608620000	404130000	449810000	555950000	484250000	565890000	514700000	573130000	565440000	591560000	606000000	600200000	581810000	435960000	583980000	583910000	528340000	521930000	579460000	614790000	520360000	617520000	593880000	579180000
ADAR	P55265	P55265	sp|P55265|DSRAD_HUMAN Double-stranded RNA-specific adenosine deaminase OS=Homo sapiens OX=9606 GN=ADAR PE=1 SV=4	32	32	10270000000	672720000	806990000	680090000	818770000	582710000	235260000	546380000	433640000	456240000	325740000	176720000	497310000	420360000	398090000	435070000	428910000	381470000	220820000	497240000	486630000	275220000	493930000	678510000	736960000	603540000	612710000	616900000	483480000	481890000	566260000	526470000	493220000	497330000	481580000	468330000	534250000	534950000	536930000	513420000	587620000	502520000	492090000	545300000
TRAP1	Q12931	Q12931	sp|Q12931|TRAP1_HUMAN Heat shock protein 75 kDa, mitochondrial OS=Homo sapiens OX=9606 GN=TRAP1 PE=1 SV=3	28	28	10222000000	1006800000	1188500000	724590000	940130000	721140000	411030000	426620000	266220000	346410000	295400000	249410000	368810000	303270000	290310000	400940000	363640000	313010000	171770000	450310000	420830000	274770000	288290000	851210000	1229300000	812200000	828110000	778860000	464530000	407770000	426120000	384060000	392010000	481710000	413030000	442770000	450730000	436110000	417220000	433540000	478350000	461150000	418370000	443800000
CBS	P35520	P35520	sp|P35520|CBS_HUMAN Cystathionine beta-synthase OS=Homo sapiens OX=9606 GN=CBS PE=1 SV=2	20	20	10220000000	1498200000	1116100000	1191900000	1588900000	1267800000	307110000	264860000	212670000	131750000	139290000	198020000	265530000	226140000	243890000	129380000	120650000	242770000	167250000	173940000	237320000	227020000	269370000	1393000000	1144900000	1260600000	1443800000	1412400000	372890000	322660000	319230000	226940000	277510000	350130000	263230000	350020000	381290000	315720000	269780000	296310000	367780000	296210000	268180000	359690000
PPM1G	O15355	O15355	sp|O15355|PPM1G_HUMAN Protein phosphatase 1G OS=Homo sapiens OX=9606 GN=PPM1G PE=1 SV=1	19	19	10219000000	713160000	469670000	612880000	752820000	563880000	420910000	531250000	361840000	443190000	404240000	325430000	568350000	312080000	380290000	475070000	448810000	410540000	178400000	528000000	574650000	333020000	410400000	725780000	525390000	695640000	702670000	684640000	469050000	493630000	584630000	494370000	524130000	471240000	561780000	499060000	511170000	503570000	564520000	532800000	498340000	519600000	565910000	539350000
USO1	O60763;REV__Q5VZ89	O60763	sp|O60763|USO1_HUMAN General vesicular transport factor p115 OS=Homo sapiens OX=9606 GN=USO1 PE=1 SV=2	32	32	10162000000	986310000	664470000	884540000	941520000	806790000	318490000	489180000	370950000	373030000	392870000	192560000	371400000	260990000	318180000	419840000	408880000	418120000	196360000	414930000	355320000	251880000	324970000	795190000	732840000	896300000	794490000	782690000	458540000	429510000	511170000	448710000	483850000	465710000	434360000	448740000	521600000	437520000	464170000	480240000	557210000	443930000	466510000	475190000
VPS35	Q96QK1	Q96QK1	sp|Q96QK1|VPS35_HUMAN Vacuolar protein sorting-associated protein 35 OS=Homo sapiens OX=9606 GN=VPS35 PE=1 SV=2	25	25	10162000000	452920000	207290000	196570000	364580000	257930000	548510000	757520000	412090000	663590000	532280000	386840000	545430000	344040000	283070000	729940000	552960000	485350000	228670000	636580000	647020000	511290000	417360000	354960000	309220000	353100000	397220000	361530000	603860000	624810000	585700000	644690000	632510000	572650000	590070000	586430000	557620000	641280000	617330000	596870000	550070000	604640000	593970000	577310000
NARS	O43776	O43776	sp|O43776|SYNC_HUMAN Asparagine--tRNA ligase, cytoplasmic OS=Homo sapiens OX=9606 GN=NARS1 PE=1 SV=1	22	22	10107000000	815940000	453660000	494840000	836210000	583070000	377130000	599950000	392170000	441890000	411730000	239450000	528770000	347870000	295540000	470690000	456400000	380170000	253150000	584360000	454380000	278030000	412020000	725870000	544020000	605480000	687120000	692840000	467470000	501840000	501650000	577960000	483010000	436900000	509920000	450470000	507470000	566390000	485130000	491990000	457250000	533490000	493750000	504260000
RPS15	P62841	P62841	sp|P62841|RS15_HUMAN 40S ribosomal protein S15 OS=Homo sapiens OX=9606 GN=RPS15 PE=1 SV=2	4	4	10106000000	858690000	832580000	1117500000	758680000	675350000	450210000	410210000	391210000	317540000	265190000	263380000	410730000	291070000	296590000	497380000	360680000	346690000	238190000	430100000	365900000	286070000	241910000	855700000	857190000	1105100000	793590000	862130000	570470000	420110000	476850000	410150000	384570000	436240000	490190000	513000000	474690000	471730000	418930000	442940000	429740000	424430000	435910000	457720000
PSMB2	P49721	P49721	sp|P49721|PSB2_HUMAN Proteasome subunit beta type-2 OS=Homo sapiens OX=9606 GN=PSMB2 PE=1 SV=1	14	14	10099000000	615420000	462720000	460800000	563830000	520400000	415490000	767620000	426950000	637980000	439680000	238440000	564270000	333720000	308930000	423690000	539230000	431980000	153740000	555160000	590680000	259920000	388770000	610960000	521350000	594750000	555820000	656770000	510220000	641500000	465750000	682260000	542270000	420790000	544410000	437450000	429760000	503300000	648430000	485830000	318250000	563210000	766900000	457800000
SNRPA	P09012	P09012	sp|P09012|SNRPA_HUMAN U1 small nuclear ribonucleoprotein A OS=Homo sapiens OX=9606 GN=SNRPA PE=1 SV=3	6	8	10067000000	577600000	430250000	466460000	545610000	475040000	415520000	670500000	295680000	583360000	492930000	253050000	421550000	308420000	336760000	609480000	581730000	435280000	247930000	578810000	589100000	347830000	404200000	530710000	473880000	549030000	533300000	584830000	489100000	605080000	521500000	622920000	547790000	488130000	439790000	513920000	513210000	654750000	584640000	543170000	504820000	559800000	601860000	517770000
TRA2B	P62995	P62995	sp|P62995|TRA2B_HUMAN Transformer-2 protein homolog beta OS=Homo sapiens OX=9606 GN=TRA2B PE=1 SV=1	16	19	10056000000	334030000	286630000	373450000	359030000	255400000	461230000	501120000	381560000	549420000	423780000	474810000	559310000	437040000	502520000	508740000	493000000	413900000	534150000	575110000	626910000	418700000	585940000	419350000	403760000	423780000	496270000	397610000	600750000	601370000	541390000	581110000	490120000	723130000	475360000	598250000	572830000	557960000	528720000	561120000	816480000	547610000	569750000	586970000
RPL35A	P18077	P18077	sp|P18077|RL35A_HUMAN 60S ribosomal protein L35a OS=Homo sapiens OX=9606 GN=RPL35A PE=1 SV=2	7	7	10039000000	1075000000	895220000	932290000	986320000	1075300000	421710000	354060000	159490000	248630000	228630000	309480000	356090000	207230000	230000000	460340000	250430000	331460000	191130000	418670000	322960000	287170000	297750000	1055400000	920860000	1038200000	913620000	1211900000	535250000	372220000	226800000	314020000	279750000	551150000	384370000	343330000	432050000	496130000	318120000	376730000	374920000	429980000	389150000	491570000
HNRNPH2	P55795	P55795	sp|P55795|HNRH2_HUMAN Heterogeneous nuclear ribonucleoprotein H2 OS=Homo sapiens OX=9606 GN=HNRNPH2 PE=1 SV=1	5	5	10037000000	260960000	242490000	196160000	270470000	208930000	581360000	618080000	500450000	532740000	527240000	392330000	655340000	428730000	398070000	592440000	595140000	536540000	262640000	741000000	554870000	451890000	489560000	262800000	290810000	241510000	270970000	263180000	703750000	576890000	649930000	560230000	603600000	697140000	655640000	626500000	628720000	623700000	648750000	648480000	573680000	732410000	576810000	696040000
KLC1	Q07866;Q6P597	Q07866	sp|Q07866|KLC1_HUMAN Kinesin light chain 1 OS=Homo sapiens OX=9606 GN=KLC1 PE=1 SV=2	18	27	10030000000	202780000	97680000	186480000	244910000	219230000	450250000	733610000	569310000	724560000	584610000	374180000	559980000	445150000	437310000	564160000	592130000	569370000	261900000	709230000	625390000	391570000	486630000	337740000	247350000	277750000	339860000	296760000	602750000	645580000	648800000	771390000	653540000	563650000	529740000	579300000	614310000	550740000	616900000	714480000	601160000	628690000	650800000	614970000
EIF4H	Q15056	Q15056	sp|Q15056|IF4H_HUMAN Eukaryotic translation initiation factor 4H OS=Homo sapiens OX=9606 GN=EIF4H PE=1 SV=5	11	11	10005000000	790110000	462720000	560080000	677220000	664410000	394970000	463230000	410560000	613860000	537500000	269230000	350070000	369640000	332580000	431000000	358020000	509730000	308360000	514430000	363780000	213830000	409900000	777600000	605850000	736390000	711410000	877720000	468680000	470840000	471450000	670750000	580150000	444400000	408410000	534120000	416080000	513500000	418820000	604650000	430140000	504260000	454170000	464730000
PRDX4	Q13162	Q13162	sp|Q13162|PRDX4_HUMAN Peroxiredoxin-4 OS=Homo sapiens OX=9606 GN=PRDX4 PE=1 SV=1	10	10	9999200000	612870000	727050000	389000000	582700000	358260000	577540000	675920000	373810000	522150000	485600000	232560000	436230000	339050000	253280000	554510000	500700000	386160000	181290000	629680000	594410000	285780000	300660000	547970000	762260000	510350000	530850000	443170000	598080000	580000000	554580000	522980000	495540000	497010000	464680000	483540000	521910000	551740000	539710000	489180000	395820000	606370000	588600000	486320000
QARS	P47897	P47897	sp|P47897|SYQ_HUMAN Glutamine--tRNA ligase OS=Homo sapiens OX=9606 GN=QARS1 PE=1 SV=1	35	35	9938400000	603490000	396580000	537860000	529520000	424970000	501770000	550720000	393880000	502490000	517680000	266920000	516740000	349910000	338530000	489350000	573860000	385800000	192850000	628600000	510690000	344780000	381460000	596570000	541010000	605620000	580190000	580220000	533010000	535830000	484610000	503070000	511040000	571320000	554440000	531220000	478100000	597120000	542870000	505700000	520010000	561110000	500330000	501660000
UQCRC2	P22695	P22695	sp|P22695|QCR2_HUMAN Cytochrome b-c1 complex subunit 2, mitochondrial OS=Homo sapiens OX=9606 GN=UQCRC2 PE=1 SV=3	14	14	9932200000	582930000	783050000	538450000	551600000	383790000	408380000	585340000	441680000	480600000	443870000	212010000	451000000	273620000	261100000	471450000	619690000	394070000	199970000	608450000	560780000	317670000	362680000	549490000	907440000	600440000	515550000	500580000	521100000	578240000	477340000	488030000	469860000	479700000	524950000	456730000	480940000	481750000	626550000	458930000	489270000	556200000	589180000	490940000
TXNL1	O43396	O43396	sp|O43396|TXNL1_HUMAN Thioredoxin-like protein 1 OS=Homo sapiens OX=9606 GN=TXNL1 PE=1 SV=3	16	16	9900400000	713630000	545240000	678990000	745020000	466140000	399810000	477000000	360730000	678770000	447750000	235080000	476610000	329880000	346280000	356610000	404000000	394430000	170050000	401990000	432220000	409830000	430330000	556610000	541440000	611760000	559950000	752110000	510750000	539200000	456700000	578990000	469070000	460850000	427080000	447380000	527030000	516230000	476100000	479930000	455400000	434870000	521160000	455200000
HIST1H2AC	Q93077	Q93077	sp|Q93077|H2A1C_HUMAN Histone H2A type 1-C OS=Homo sapiens OX=9606 GN=H2AC6 PE=1 SV=3	0	1	9890800000	303210000	345730000	146030000	233530000	121590000	410370000	585580000	421620000	273120000	492950000	425940000	1034700000	627320000	627750000	300510000	580590000	568270000	201350000	656640000	548620000	493320000	492030000	290030000	415200000	180890000	234010000	153720000	457260000	541130000	580170000	281970000	549850000	759400000	1079200000	962230000	1002400000	311630000	632910000	686510000	427980000	644780000	595450000	749250000
FBL	P22087	P22087	sp|P22087|FBRL_HUMAN rRNA 2-O-methyltransferase fibrillarin OS=Homo sapiens OX=9606 GN=FBL PE=1 SV=2	13	14	9884900000	964380000	931080000	758170000	682500000	518350000	385160000	585810000	311760000	408110000	359130000	156130000	463270000	195720000	166620000	598080000	484460000	287930000	131760000	474610000	497710000	209120000	315060000	790470000	977560000	712950000	711580000	696010000	517540000	456370000	402620000	395510000	436300000	418700000	468380000	405180000	377180000	532820000	437210000	381460000	482040000	462990000	475410000	396810000
UTS2	O95399	O95399	sp|O95399|UTS2_HUMAN Urotensin-2 OS=Homo sapiens OX=9606 GN=UTS2 PE=1 SV=1	1	1	9870900000	643240000	724120000	493130000	572750000	507110000	468130000	448590000	316230000	419930000	448360000	359850000	392210000	399240000	367930000	416800000	445620000	384080000	329090000	510340000	405970000	353920000	464300000	0	0	0	0	0	0	0	0	0	0	0	0	0	0	0	0	0	0	0	0	0
RPA2	P15927	P15927	sp|P15927|RFA2_HUMAN Replication protein A 32 kDa subunit OS=Homo sapiens OX=9606 GN=RPA2 PE=1 SV=1	9	9	9863700000	301010000	201020000	234530000	258940000	263160000	492620000	783230000	331710000	568350000	545560000	374660000	675820000	393600000	412320000	489670000	657570000	492230000	166060000	795820000	611700000	347030000	467100000	325740000	276160000	315750000	312730000	353870000	577730000	668300000	445240000	615010000	596330000	571720000	592810000	607890000	579770000	585540000	675450000	578710000	459130000	704380000	629070000	547470000
[truncated: 4,071 more rows]
[truncated: 30 more columns]

## Sheet: Suppl. Table S4B
Supplementary Table S4B: Results of MS-EmpiRe-based quantitative proteomics of D21 (NSC) vs D0 (iPSC). Proteins showing significant differences in abundance between D21 vs D0 (FDR < 0.05, fold-change > 1.3) are marked with a '+'. Positive log2 fold changes means more abundant in the D21 group.
[truncated: 2,235 more rows]

[truncated: 5 more sheets: Suppl. Table S4C, Suppl. Table S4D, Suppl. Table S4E, Suppl. Table S4F, Suppl. Table S4G]
