# Supplementary material for: Proteomics and disease network associations evaluation of environmentally relevant Bisphenol A concentrations in a human 3D neural stem cell model
Source: Front Cell Dev Biol. 2023 Aug 16;11:1236243. doi: 10.3389/fcell.2023.1236243 (PMC10472293; doi:10.3389/fcell.2023.1236243)
Supplement: Supplementary file 6 [file Table4.xlsx]

## Sheet: Suppl table S7A
Supplementary Table S7A: An enrichment analysis was performed for KEGG pathway and the main three branches of the Gene Ontology (Biological Processes, Molecular Functions, and Cellular Components) of the differentially abundant proteins under the perturbation of 0.01uM BPA using a Benjamini-Hochberg threshold=0.05 (correcting for multiple comparisons).
Library	Term	Group	p-value	Adjusted p-value	Combined Score	Genes
GO_Biological_Process_2021	Wnt signaling pathway (GO:0016055)	Tot Proteins	2.0108782415340973e-05	0.0031168612743778	805.97	WNT8B;GPC4;WLS
GO_Cellular_Component_2021	cortical cytoskeleton (GO:0030863)	Tot Proteins	0.0005354125163723767	0.0107082503274475	536.2	LASP1;EZR
GO_Cellular_Component_2021	filopodium (GO:0030175)	Tot Proteins	0.0005354125163723767	0.0107082503274475	536.2	GAP43;EZR
GO_Biological_Process_2021	establishment of centrosome localization (GO:0051660)	Tot Core Proteins	0.0010496614322994	0.0108471953431392	11427.0	EZR
GO_Biological_Process_2021	negative regulation of p38MAPK cascade (GO:1903753)	Tot Core Proteins	0.0010496614322994	0.0108471953431392	11427.0	EZR
GO_Biological_Process_2021	gland morphogenesis (GO:0022612)	Tot Core Proteins	0.0010496614322994	0.0108471953431392	11427.0	EZR
GO_Biological_Process_2021	sphingosine-1-phosphate receptor signaling pathway (GO:0003376)	Tot Core Proteins	0.0010496614322994	0.0108471953431392	11427.0	EZR
GO_Biological_Process_2021	positive regulation of protein localization to early endosome (GO:1902966)	Tot Core Proteins	0.0011995541091196	0.0108471953431392	9603.49	EZR
GO_Biological_Process_2021	positive regulation of protein localization to endosome (GO:1905668)	Tot Core Proteins	0.0011995541091196	0.0108471953431392	9603.49	EZR
GO_Biological_Process_2021	positive regulation of early endosome to late endosome transport (GO:2000643)	Tot Core Proteins	0.0011995541091196	0.0108471953431392	9603.49	EZR
GO_Biological_Process_2021	regulation of protein localization to early endosome (GO:1902965)	Tot Core Proteins	0.0011995541091196	0.0108471953431392	9603.49	EZR
GO_Biological_Process_2021	astral microtubule organization (GO:0030953)	Tot Core Proteins	0.0013494318923464	0.0108471953431392	8255.55	EZR
GO_Biological_Process_2021	establishment of epithelial cell apical/basal polarity (GO:0045198)	Tot Core Proteins	0.0016491427308511	0.0108471953431392	6403.33	EZR
GO_Biological_Process_2021	positive regulation of cytoplasmic transport (GO:1903651)	Tot Core Proteins	0.0016491427308511	0.0108471953431392	6403.33	EZR
GO_Biological_Process_2021	microvillus organization (GO:0032528)	Tot Core Proteins	0.0020985970505495	0.0108471953431392	4739.66	EZR
GO_Biological_Process_2021	polarized epithelial cell differentiation (GO:0030859)	Tot Core Proteins	0.0020985970505495	0.0108471953431392	4739.66	EZR
GO_Biological_Process_2021	microvillus assembly (GO:0030033)	Tot Core Proteins	0.002248385285759	0.0108471953431392	4351.69	EZR
GO_Biological_Process_2021	establishment of apical/basal cell polarity (GO:0035089)	Tot Core Proteins	0.002248385285759	0.0108471953431392	4351.69	EZR
GO_Biological_Process_2021	protein kinase A signaling (GO:0010737)	Tot Core Proteins	0.002248385285759	0.0108471953431392	4351.69	EZR
GO_Biological_Process_2021	filopodium assembly (GO:0046847)	Tot Core Proteins	0.0023981585785517	0.0108471953431392	4018.42	EZR
GO_Biological_Process_2021	regulation of early endosome to late endosome transport (GO:2000641)	Tot Core Proteins	0.0026976603266888	0.0108471953431392	3476.15	EZR
GO_Biological_Process_2021	regulation of cellular protein catabolic process (GO:1903362)	Tot Core Proteins	0.0026976603266888	0.0108471953431392	3476.15	EZR
GO_Biological_Process_2021	positive regulation of cellular protein catabolic process (GO:1903364)	Tot Core Proteins	0.002847388777574	0.0108471953431392	3252.89	EZR
GO_Biological_Process_2021	negative regulation of T cell receptor signaling pathway (GO:0050860)	Tot Core Proteins	0.002847388777574	0.0108471953431392	3252.89	EZR
GO_Biological_Process_2021	establishment of epithelial cell polarity (GO:0090162)	Tot Core Proteins	0.0029971022769704	0.0108985537344381	3054.59	EZR
GO_Biological_Process_2021	negative regulation of interleukin-2 production (GO:0032703)	Tot Core Proteins	0.003296484417552	0.0114660327567026	2718.11	EZR
GO_Biological_Process_2021	regulation of cell size (GO:0008361)	Tot Core Proteins	0.0035958067387344	0.0119806467791013	2443.77	EZR
GO_Biological_Process_2021	negative regulation of antigen receptor-mediated signaling pathway (GO:0050858)	Tot Core Proteins	0.0037454454654532	0.0119806467791013	2324.86	EZR
GO_Biological_Process_2021	endothelial cell development (GO:0001885)	Tot Core Proteins	0.003895069234369	0.0119806467791013	2216.11	EZR
GO_Biological_Process_2021	leukocyte cell-cell adhesion (GO:0007159)	Tot Core Proteins	0.0041942719009199	0.0119806467791013	2024.38	EZR
GO_Biological_Process_2021	establishment of endothelial barrier (GO:0061028)	Tot Core Proteins	0.0043438507968609	0.0119806467791013	1939.49	EZR
GO_Biological_Process_2021	regulation of cellular component size (GO:0032535)	Tot Core Proteins	0.0046429637132384	0.0119806467791013	1787.85	EZR
GO_Biological_Process_2021	cellular response to cAMP (GO:0071320)	Tot Core Proteins	0.0046429637132384	0.0119806467791013	1787.85	EZR
GO_Biological_Process_2021	establishment or maintenance of epithelial cell apical/basal polarity (GO:0045197)	Tot Core Proteins	0.0047924977347936	0.0119806467791013	1719.88	EZR
GO_Biological_Process_2021	actin filament bundle assembly (GO:0051017)	Tot Core Proteins	0.0049420167963792	0.0119806467791013	1656.47	EZR
GO_Biological_Process_2021	actin filament bundle organization (GO:0061572)	Tot Core Proteins	0.0049420167963792	0.0119806467791013	1656.47	EZR
GO_Biological_Process_2021	regulation of T cell receptor signaling pathway (GO:0050856)	Tot Core Proteins	0.0052410100460964	0.0122922464128899	1541.63	EZR
GO_Biological_Process_2021	regulation of p38MAPK cascade (GO:1900744)	Tot Core Proteins	0.0055399434616103	0.0122922464128899	1440.46	EZR
GO_Biological_Process_2021	negative regulation of stress-activated MAPK cascade (GO:0032873)	Tot Core Proteins	0.0055399434616103	0.0122922464128899	1440.46	EZR
GO_Biological_Process_2021	response to cAMP (GO:0051591)	Tot Core Proteins	0.0056893877328946	0.0122922464128899	1394.27	EZR
GO_Biological_Process_2021	regulation of cellular component biogenesis (GO:0044087)	Tot Core Proteins	0.0058388170461227	0.0122922464128899	1350.71	EZR
GO_Biological_Process_2021	cortical cytoskeleton organization (GO:0030865)	Tot Core Proteins	0.0061376308005125	0.0125900118984873	1270.59	EZR
GO_Biological_Process_2021	regulation of interleukin-2 production (GO:0032663)	Tot Core Proteins	0.0071830078183245	0.014366015636649	1047.6	EZR
GO_Biological_Process_2021	negative regulation of ERK1 and ERK2 cascade (GO:0070373)	Tot Core Proteins	0.0074815523734162	0.0145348613731343	996.45	EZR
GO_Biological_Process_2021	inositol lipid-mediated signaling (GO:0048017)	Tot Core Proteins	0.0076308022208955	0.0145348613731343	972.53	EZR
GO_Biological_Process_2021	cytoplasmic microtubule organization (GO:0031122)	Tot Core Proteins	0.0080784620472779	0.0150296968321451	906.62	EZR
GO_Biological_Process_2021	actin cytoskeleton reorganization (GO:0031532)	Tot Core Proteins	0.0094206342211661	0.0171284258566657	749.95	EZR
GO_Biological_Process_2021	positive regulation of protein transport (GO:0051222)	Tot Core Proteins	0.0103147430639722	0.0174568268251583	670.29	EZR
GO_Biological_Process_2021	phosphatidylinositol-mediated signaling (GO:0048015)	Tot Core Proteins	0.0106126597969386	0.0174568268251583	647.02	EZR
GO_Biological_Process_2021	gland development (GO:0048732)	Tot Core Proteins	0.0106126597969386	0.0174568268251583	647.02	EZR
GO_Biological_Process_2021	positive regulation of protein secretion (GO:0050714)	Tot Core Proteins	0.0107615957524881	0.0174568268251583	635.92	EZR
GO_Biological_Process_2021	positive regulation of secretion by cell (GO:1903532)	Tot Core Proteins	0.0107615957524881	0.0174568268251583	635.92	EZR
GO_Biological_Process_2021	regulation of actin filament-based process (GO:0032970)	Tot Core Proteins	0.0109105167657239	0.0174568268251583	625.15	EZR
GO_Biological_Process_2021	regulation of organelle assembly (GO:1902115)	Tot Core Proteins	0.0115060514233315	0.0180415782187829	585.16	EZR
GO_Biological_Process_2021	regulation of organelle organization (GO:0033043)	Tot Core Proteins	0.0119525455699436	0.0180415782187829	558.06	EZR
GO_Biological_Process_2021	regulation of NIK/NF-kappaB signaling (GO:1901222)	Tot Core Proteins	0.0119525455699436	0.0180415782187829	558.06	EZR
GO_Biological_Process_2021	positive regulation of protein catabolic process (GO:0045732)	Tot Core Proteins	0.0126964037761181	0.0188094870757305	517.55	EZR
GO_Biological_Process_2021	regulation of actin cytoskeleton organization (GO:0032956)	Tot Core Proteins	0.0135885408650015	0.0197651503490931	475.39	EZR
GO_Biological_Process_2021	negative regulation of MAPK cascade (GO:0043409)	Tot Core Proteins	0.0140344078673636	0.0200491540962337	456.53	EZR
GO_Biological_Process_2021	positive regulation of cellular protein metabolic process (GO:0032270)	Tot Core Proteins	0.0152227298331673	0.0212016592091875	412.2	EZR
GO_Biological_Process_2021	cellular response to organonitrogen compound (GO:0071417)	Tot Core Proteins	0.015371202926661	0.0212016592091875	407.19	EZR
GO_Biological_Process_2021	regulation of cytoskeleton organization (GO:0051493)	Tot Core Proteins	0.0167067894603527	0.0226532738445461	366.54	EZR
GO_Biological_Process_2021	ion transport (GO:0006811)	Tot Core Proteins	0.0172999956867377	0.0230666609156503	350.71	LASP1
GO_Biological_Process_2021	regulation of protein secretion (GO:0050708)	Tot Core Proteins	0.0186338374756652	0.0244378196402167	319.15	EZR
GO_Biological_Process_2021	protein localization to plasma membrane (GO:0072659)	Tot Core Proteins	0.0202624490989434	0.0261450956115398	286.82	EZR
GO_Biological_Process_2021	protein localization to cell periphery (GO:1990778)	Tot Core Proteins	0.0208542245588729	0.026252663981986	276.45	EZR
GO_Biological_Process_2021	positive regulation of cellular catabolic process (GO:0031331)	Tot Core Proteins	0.0210021311855888	0.026252663981986	273.96	EZR
GO_Biological_Process_2021	cellular response to organic cyclic compound (GO:0071407)	Tot Core Proteins	0.0223326207425039	0.0274863024523125	253.21	EZR
GO_Biological_Process_2021	negative regulation of cytokine production (GO:0001818)	Tot Core Proteins	0.0270534883841024	0.0327921071322454	197.61	EZR
GO_Biological_Process_2021	protein localization to membrane (GO:0072657)	Tot Core Proteins	0.028966992043161	0.0345874531858639	180.76	EZR
GO_Biological_Process_2021	axon guidance (GO:0007411)	Tot Core Proteins	0.0301432849570313	0.0354626881847428	171.58	EZR
GO_Biological_Process_2021	regulation of ERK1 and ERK2 cascade (GO:0070372)	Tot Core Proteins	0.0352783986095116	0.0406528971066326	139.42	EZR
GO_Biological_Process_2021	axonogenesis (GO:0007409)	Tot Core Proteins	0.0355712849683035	0.0406528971066326	137.9	EZR
GO_Biological_Process_2021	cellular component assembly (GO:0022607)	Tot Core Proteins	0.0386430138026298	0.0435414240029631	123.48	EZR
GO_Biological_Process_2021	plasma membrane bounded cell projection assembly (GO:0120031)	Tot Core Proteins	0.0411248692084052	0.0456942991204502	113.59	EZR
GO_Molecular_Function_2021	cadherin binding (GO:0045296)	Tot Core Proteins	0.0007669645150287828	0.006902680635259	882.15	LASP1;EZR
GO_Molecular_Function_2021	protein kinase A catalytic subunit binding (GO:0034236)	Tot Core Proteins	0.0019487938770013	0.0087695724465061	5196.55	EZR
GO_Molecular_Function_2021	protein kinase A regulatory subunit binding (GO:0034237)	Tot Core Proteins	0.003296484417552	0.009889453252656	2718.11	EZR
GO_Molecular_Function_2021	ATPase binding (GO:0051117)	Tot Core Proteins	0.0109105167657239	0.0245486627228789	625.15	EZR
GO_Molecular_Function_2021	actin binding (GO:0003779)	Tot Core Proteins	0.0263168566863423	0.0473703420354161	204.83	EZR
GO_Cellular_Component_2021	cortical cytoskeleton (GO:0030863)	Tot Core Proteins	2.474861877676981e-05	0.0004702237567586264	7553.89	LASP1;EZR
GO_Cellular_Component_2021	actin cytoskeleton (GO:0015629)	Tot Core Proteins	0.0007387537330881202	0.0054443114468174	903.98	LASP1;EZR
GO_Cellular_Component_2021	focal adhesion (GO:0005925)	Tot Core Proteins	0.0011060160412099	0.0054443114468174	693.5	LASP1;EZR
GO_Cellular_Component_2021	cell-substrate junction (GO:0030055)	Tot Core Proteins	0.0011461708309089	0.0054443114468174	677.31	LASP1;EZR
GO_Cellular_Component_2021	preribosome, large subunit precursor (GO:0030687)	Tot Core Proteins	0.0034461530563075	0.0130953816139688	2574.28	WDR37
GO_Cellular_Component_2021	cortical actin cytoskeleton (GO:0030864)	Tot Core Proteins	0.0062870152415198	0.018314168616915	1233.69	LASP1
GO_Cellular_Component_2021	cytoplasmic side of plasma membrane (GO:0009898)	Tot Core Proteins	0.0082276520870908	0.018314168616915	886.4	EZR
GO_Cellular_Component_2021	microvillus (GO:0005902)	Tot Core Proteins	0.0085259873136886	0.018314168616915	848.32	EZR
GO_Cellular_Component_2021	filopodium (GO:0030175)	Tot Core Proteins	0.0086751325027492	0.018314168616915	830.36	EZR
GO_Cellular_Component_2021	actin filament (GO:0005884)	Tot Core Proteins	0.0107615957524881	0.0196316000516299	635.92	EZR
GO_Cellular_Component_2021	plasma membrane raft (GO:0044853)	Tot Core Proteins	0.012250133655514	0.0196316000516299	541.2	EZR
GO_Cellular_Component_2021	actin-based cell projection (GO:0098858)	Tot Core Proteins	0.0123989052957663	0.0196316000516299	533.11	EZR
GO_Cellular_Component_2021	basolateral plasma membrane (GO:0016323)	Tot Core Proteins	0.0224803784730512	0.0328559377683057	251.07	EZR
GO_Cellular_Component_2021	membrane raft (GO:0045121)	Tot Core Proteins	0.0242523103555676	0.0329138497682703	227.69	EZR
GO_Cellular_Component_2021	vesicle (GO:0031982)	Tot Core Proteins	0.0335198352152786	0.0424584579393529	149.2	EZR
GO_Cellular_Component_2021	polymeric cytoskeletal fiber (GO:0099513)	Tot Core Proteins	0.0379122422328197	0.0450207876514734	126.68	EZR
KEGG_2021_Human	Gastric acid secretion	Tot Core Proteins	0.0113571901659932	0.0377373187843669	594.73	EZR
KEGG_2021_Human	Leukocyte transendothelial migration	Tot Core Proteins	0.0170034223995669	0.0377373187843669	358.47	EZR
KEGG_2021_Human	Tight junction	Tot Core Proteins	0.0251374728576962	0.0377373187843669	217.38	EZR
KEGG_2021_Human	Pathogenic Escherichia coli infection	Tot Core Proteins	0.0292611543756679	0.0377373187843669	178.39	EZR
KEGG_2021_Human	Proteoglycans in cancer	Tot Core Proteins	0.0304372096910158	0.0377373187843669	169.41	EZR
KEGG_2021_Human	Regulation of actin cytoskeleton	Tot Core Proteins	0.0323462732437431	0.0377373187843669	156.38	EZR
KEGG_2021_Human	MicroRNAs in cancer	Tot Core Proteins	0.0457850030466385	0.0457850030466385	98.24	EZR
GO_Biological_Process_2021	triglyceride catabolic process (GO:0019433)	Up-regulated Proteins	0.0011499748819949	0.0061248823025585	135204.64	FABP7
GO_Biological_Process_2021	acylglycerol catabolic process (GO:0046464)	Up-regulated Proteins	0.0017499663721595	0.0061248823025585	126740.99	FABP7
GO_Biological_Process_2021	triglyceride metabolic process (GO:0006641)	Up-regulated Proteins	0.0027499544131125	0.0064165602972626	117599.13	FABP7
GO_Biological_Process_2021	negative regulation of cell population proliferation (GO:0008285)	Up-regulated Proteins	0.0189498578729893	0.0312897844443253	77816.08	FABP7
GO_Biological_Process_2021	nervous system development (GO:0007399)	Up-regulated Proteins	0.0223498460316609	0.0312897844443253	74319.7	FABP7
GO_Biological_Process_2021	negative regulation of cellular process (GO:0048523)	Up-regulated Proteins	0.0282998285064415	0.0330164665908485	69280.26	FABP7
GO_Biological_Process_2021	regulation of cell population proliferation (GO:0042127)	Up-regulated Proteins	0.0381998058286958	0.0381998058286958	62804.09	FABP7
KEGG_2021_Human	PPAR signaling pathway	Up-regulated Proteins	0.0036999446830449	0.0036999446830449	111574.39	FABP7
GO_Biological_Process_2021	Wnt signaling pathway (GO:0016055)	Down-regulated Proteins	1.5131978905819234e-05	0.002254664856967	930.61	WNT8B;GPC4;WLS
GO_Biological_Process_2021	positive regulation of protein secretion (GO:0050714)	Down-regulated Proteins	0.0006883061323478026	0.0462798019095152	460.43	EZR;WLS
GO_Biological_Process_2021	determination of dorsal/ventral asymmetry (GO:0048262)	Down-regulated Proteins	0.0027472053583369	0.0462798019095152	2946.37	WNT8B
GO_Biological_Process_2021	axon choice point recognition (GO:0016198)	Down-regulated Proteins	0.0027472053583369	0.0462798019095152	2946.37	GAP43
GO_Biological_Process_2021	establishment of centrosome localization (GO:0051660)	Down-regulated Proteins	0.0038441720045859	0.0462798019095152	1852.16	EZR
GO_Biological_Process_2021	sphingosine-1-phosphate receptor signaling pathway (GO:0003376)	Down-regulated Proteins	0.0038441720045859	0.0462798019095152	1852.16	EZR
GO_Biological_Process_2021	negative regulation of p38MAPK cascade (GO:1903753)	Down-regulated Proteins	0.0038441720045859	0.0462798019095152	1852.16	EZR
GO_Biological_Process_2021	gland morphogenesis (GO:0022612)	Down-regulated Proteins	0.0038441720045859	0.0462798019095152	1852.16	EZR
GO_Biological_Process_2021	positive regulation of protein localization to early endosome (GO:1902966)	Down-regulated Proteins	0.004392244396163	0.0462798019095152	1549.44	EZR
GO_Biological_Process_2021	positive regulation of protein localization to endosome (GO:1905668)	Down-regulated Proteins	0.004392244396163	0.0462798019095152	1549.44	EZR
GO_Biological_Process_2021	positive regulation of early endosome to late endosome transport (GO:2000643)	Down-regulated Proteins	0.004392244396163	0.0462798019095152	1549.44	EZR
GO_Biological_Process_2021	regulation of protein localization to early endosome (GO:1902965)	Down-regulated Proteins	0.004392244396163	0.0462798019095152	1549.44	EZR
GO_Biological_Process_2021	astral microtubule organization (GO:0030953)	Down-regulated Proteins	0.004940042922945	0.0462798019095152	1326.33	EZR
GO_Biological_Process_2021	axon regeneration (GO:0031103)	Down-regulated Proteins	0.004940042922945	0.0462798019095152	1326.33	GAP43
GO_Biological_Process_2021	axon guidance (GO:0007411)	Down-regulated Proteins	0.0053085063609301	0.0462798019095152	114.6	GAP43;EZR
GO_Biological_Process_2021	neuron projection regeneration (GO:0031102)	Down-regulated Proteins	0.0054875676690229	0.0462798019095152	1155.57	GAP43
GO_Biological_Process_2021	establishment of epithelial cell apical/basal polarity (GO:0045198)	Down-regulated Proteins	0.0060348187277604	0.0462798019095152	1020.97	EZR
GO_Biological_Process_2021	positive regulation of cytoplasmic transport (GO:1903651)	Down-regulated Proteins	0.0060348187277604	0.0462798019095152	1020.97	EZR
GO_Biological_Process_2021	protein kinase C-activating G protein-coupled receptor signaling pathway (GO:0007205)	Down-regulated Proteins	0.0060348187277604	0.0462798019095152	1020.97	GAP43
GO_Biological_Process_2021	microvillus organization (GO:0032528)	Down-regulated Proteins	0.0076749307875411	0.0462798019095152	748.3	EZR
GO_Biological_Process_2021	synaptic membrane adhesion (GO:0099560)	Down-regulated Proteins	0.0076749307875411	0.0462798019095152	748.3	GPC4
GO_Biological_Process_2021	polarized epithelial cell differentiation (GO:0030859)	Down-regulated Proteins	0.0076749307875411	0.0462798019095152	748.3	EZR
GO_Biological_Process_2021	microvillus assembly (GO:0030033)	Down-regulated Proteins	0.0082210881236714	0.0462798019095152	685.01	EZR
GO_Biological_Process_2021	establishment of apical/basal cell polarity (GO:0035089)	Down-regulated Proteins	0.0082210881236714	0.0462798019095152	685.01	EZR
GO_Biological_Process_2021	protein kinase A signaling (GO:0010737)	Down-regulated Proteins	0.0082210881236714	0.0462798019095152	685.01	EZR
GO_Biological_Process_2021	filopodium assembly (GO:0046847)	Down-regulated Proteins	0.0087669723009575	0.0462798019095152	630.75	EZR
GO_Biological_Process_2021	response to axon injury (GO:0048678)	Down-regulated Proteins	0.0098579216348164	0.0462798019095152	542.71	GAP43
GO_Biological_Process_2021	regulation of cellular protein catabolic process (GO:1903362)	Down-regulated Proteins	0.0098579216348164	0.0462798019095152	542.71	EZR
GO_Biological_Process_2021	regulation of presynapse assembly (GO:1905606)	Down-regulated Proteins	0.0098579216348164	0.0462798019095152	542.71	GPC4
GO_Biological_Process_2021	regulation of presynapse organization (GO:0099174)	Down-regulated Proteins	0.0098579216348164	0.0462798019095152	542.71	GPC4
GO_Biological_Process_2021	regulation of early endosome to late endosome transport (GO:2000641)	Down-regulated Proteins	0.0098579216348164	0.0462798019095152	542.71	EZR
GO_Biological_Process_2021	negative regulation of T cell receptor signaling pathway (GO:0050860)	Down-regulated Proteins	0.0104029870187894	0.0462798019095152	506.56	EZR
GO_Biological_Process_2021	positive regulation of cellular protein catabolic process (GO:1903364)	Down-regulated Proteins	0.0104029870187894	0.0462798019095152	506.56	EZR
GO_Biological_Process_2021	establishment of epithelial cell polarity (GO:0090162)	Down-regulated Proteins	0.0109477797028559	0.0462798019095152	474.51	EZR
GO_Biological_Process_2021	gastrulation (GO:0007369)	Down-regulated Proteins	0.0109477797028559	0.0462798019095152	474.51	WNT8B
GO_Biological_Process_2021	beta-catenin destruction complex disassembly (GO:1904886)	Down-regulated Proteins	0.0114922998030339	0.0462798019095152	445.92	WNT8B
GO_Biological_Process_2021	anterior/posterior axis specification (GO:0009948)	Down-regulated Proteins	0.0114922998030339	0.0462798019095152	445.92	WLS
GO_Biological_Process_2021	negative regulation of interleukin-2 production (GO:0032703)	Down-regulated Proteins	0.0120365474388125	0.0471959360100807	420.26	EZR
GO_Biological_Process_2021	cellular response to oxygen-containing compound (GO:1901701)	Down-regulated Proteins	0.0129882267280696	0.0476953571077447	59.14	WNT8B;EZR
GO_Biological_Process_2021	regulation of cell size (GO:0008361)	Down-regulated Proteins	0.0131242257813257	0.0476953571077447	376.17	EZR
GO_Biological_Process_2021	dorsal/ventral pattern formation (GO:0009953)	Down-regulated Proteins	0.0131242257813257	0.0476953571077447	376.17	WNT8B
GO_Biological_Process_2021	negative regulation of antigen receptor-mediated signaling pathway (GO:0050858)	Down-regulated Proteins	0.0136676567242548	0.0484876393312851	357.1	EZR
GO_Biological_Process_2021	endothelial cell development (GO:0001885)	Down-regulated Proteins	0.0142108156769532	0.0484895706785795	339.69	EZR
GO_Biological_Process_2021	microtubule polymerization or depolymerization (GO:0031109)	Down-regulated Proteins	0.014753702756032	0.0484895706785795	323.73	TPPP3
GO_Biological_Process_2021	leukocyte cell-cell adhesion (GO:0007159)	Down-regulated Proteins	0.0152963180805092	0.0484895706785795	309.05	EZR
GO_Biological_Process_2021	positive regulation of cell communication (GO:0010647)	Down-regulated Proteins	0.0152963180805092	0.0484895706785795	309.05	WLS
GO_Biological_Process_2021	establishment of endothelial barrier (GO:0061028)	Down-regulated Proteins	0.0158386617716755	0.0484895706785795	295.52	EZR
GO_Biological_Process_2021	microtubule polymerization (GO:0046785)	Down-regulated Proteins	0.0163807339505408	0.0484895706785795	282.99	TPPP3
GO_Biological_Process_2021	regulation of protein localization to membrane (GO:1905475)	Down-regulated Proteins	0.0163807339505408	0.0484895706785795	282.99	GPC4
GO_Biological_Process_2021	regulation of cellular component size (GO:0032535)	Down-regulated Proteins	0.016922534733464	0.0484895706785795	271.38	EZR
GO_Biological_Process_2021	aminoglycan catabolic process (GO:0006026)	Down-regulated Proteins	0.016922534733464	0.0484895706785795	271.38	GPC4
GO_Biological_Process_2021	cellular response to cAMP (GO:0071320)	Down-regulated Proteins	0.016922534733464	0.0484895706785795	271.38	EZR
GO_Biological_Process_2021	establishment or maintenance of epithelial cell apical/basal polarity (GO:0045197)	Down-regulated Proteins	0.0174640642408144	0.0487780557611379	260.59	EZR
GO_Biological_Process_2021	actin filament bundle assembly (GO:0051017)	Down-regulated Proteins	0.0180053225963931	0.0487780557611379	250.53	EZR
GO_Biological_Process_2021	actin filament bundle organization (GO:0061572)	Down-regulated Proteins	0.0180053225963931	0.0487780557611379	250.53	EZR
GO_Biological_Process_2021	regulation of T cell receptor signaling pathway (GO:0050856)	Down-regulated Proteins	0.0190870263243922	0.0497649216083431	232.34	EZR
GO_Biological_Process_2021	regulation of protein polymerization (GO:0032271)	Down-regulated Proteins	0.0190870263243922	0.0497649216083431	232.34	TPPP3
GO_Biological_Process_2021	negative regulation of stress-activated MAPK cascade (GO:0032873)	Down-regulated Proteins	0.0201676468856421	0.0497649216083431	216.36	EZR
GO_Biological_Process_2021	regulation of p38MAPK cascade (GO:1900744)	Down-regulated Proteins	0.0201676468856421	0.0497649216083431	216.36	EZR
GO_Biological_Process_2021	response to cAMP (GO:0051591)	Down-regulated Proteins	0.0207075512732703	0.0497649216083431	209.08	EZR
GO_Biological_Process_2021	response to estradiol (GO:0032355)	Down-regulated Proteins	0.0207075512732703	0.0497649216083431	209.08	WNT8B
GO_Biological_Process_2021	positive regulation of signaling (GO:0023056)	Down-regulated Proteins	0.0207075512732703	0.0497649216083431	209.08	WLS
GO_Cellular_Component_2021	cortical cytoskeleton (GO:0030863)	Down-regulated Proteins	0.00044700954794706256	0.0089401909589412	610.09	LASP1;EZR
GO_Cellular_Component_2021	filopodium (GO:0030175)	Down-regulated Proteins	0.00044700954794706256	0.0089401909589412	610.09	GAP43;EZR
GO_Biological_Process_2021	establishment of centrosome localization (GO:0051660)	Down-regulated Core Proteins	0.0010496614322994	0.0108471953431392	11427.0	EZR
GO_Biological_Process_2021	negative regulation of p38MAPK cascade (GO:1903753)	Down-regulated Core Proteins	0.0010496614322994	0.0108471953431392	11427.0	EZR
GO_Biological_Process_2021	gland morphogenesis (GO:0022612)	Down-regulated Core Proteins	0.0010496614322994	0.0108471953431392	11427.0	EZR
GO_Biological_Process_2021	sphingosine-1-phosphate receptor signaling pathway (GO:0003376)	Down-regulated Core Proteins	0.0010496614322994	0.0108471953431392	11427.0	EZR
GO_Biological_Process_2021	positive regulation of protein localization to early endosome (GO:1902966)	Down-regulated Core Proteins	0.0011995541091196	0.0108471953431392	9603.49	EZR
GO_Biological_Process_2021	positive regulation of protein localization to endosome (GO:1905668)	Down-regulated Core Proteins	0.0011995541091196	0.0108471953431392	9603.49	EZR
GO_Biological_Process_2021	positive regulation of early endosome to late endosome transport (GO:2000643)	Down-regulated Core Proteins	0.0011995541091196	0.0108471953431392	9603.49	EZR
GO_Biological_Process_2021	regulation of protein localization to early endosome (GO:1902965)	Down-regulated Core Proteins	0.0011995541091196	0.0108471953431392	9603.49	EZR
GO_Biological_Process_2021	astral microtubule organization (GO:0030953)	Down-regulated Core Proteins	0.0013494318923464	0.0108471953431392	8255.55	EZR
GO_Biological_Process_2021	establishment of epithelial cell apical/basal polarity (GO:0045198)	Down-regulated Core Proteins	0.0016491427308511	0.0108471953431392	6403.33	EZR
GO_Biological_Process_2021	positive regulation of cytoplasmic transport (GO:1903651)	Down-regulated Core Proteins	0.0016491427308511	0.0108471953431392	6403.33	EZR
GO_Biological_Process_2021	microvillus organization (GO:0032528)	Down-regulated Core Proteins	0.0020985970505495	0.0108471953431392	4739.66	EZR
GO_Biological_Process_2021	polarized epithelial cell differentiation (GO:0030859)	Down-regulated Core Proteins	0.0020985970505495	0.0108471953431392	4739.66	EZR
GO_Biological_Process_2021	microvillus assembly (GO:0030033)	Down-regulated Core Proteins	0.002248385285759	0.0108471953431392	4351.69	EZR
GO_Biological_Process_2021	establishment of apical/basal cell polarity (GO:0035089)	Down-regulated Core Proteins	0.002248385285759	0.0108471953431392	4351.69	EZR
GO_Biological_Process_2021	protein kinase A signaling (GO:0010737)	Down-regulated Core Proteins	0.002248385285759	0.0108471953431392	4351.69	EZR
GO_Biological_Process_2021	filopodium assembly (GO:0046847)	Down-regulated Core Proteins	0.0023981585785517	0.0108471953431392	4018.42	EZR
GO_Biological_Process_2021	regulation of early endosome to late endosome transport (GO:2000641)	Down-regulated Core Proteins	0.0026976603266888	0.0108471953431392	3476.15	EZR
GO_Biological_Process_2021	regulation of cellular protein catabolic process (GO:1903362)	Down-regulated Core Proteins	0.0026976603266888	0.0108471953431392	3476.15	EZR
GO_Biological_Process_2021	positive regulation of cellular protein catabolic process (GO:1903364)	Down-regulated Core Proteins	0.002847388777574	0.0108471953431392	3252.89	EZR
GO_Biological_Process_2021	negative regulation of T cell receptor signaling pathway (GO:0050860)	Down-regulated Core Proteins	0.002847388777574	0.0108471953431392	3252.89	EZR
GO_Biological_Process_2021	establishment of epithelial cell polarity (GO:0090162)	Down-regulated Core Proteins	0.0029971022769704	0.0108985537344381	3054.59	EZR
GO_Biological_Process_2021	negative regulation of interleukin-2 production (GO:0032703)	Down-regulated Core Proteins	0.003296484417552	0.0114660327567026	2718.11	EZR
GO_Biological_Process_2021	regulation of cell size (GO:0008361)	Down-regulated Core Proteins	0.0035958067387344	0.0119806467791013	2443.77	EZR
GO_Biological_Process_2021	negative regulation of antigen receptor-mediated signaling pathway (GO:0050858)	Down-regulated Core Proteins	0.0037454454654532	0.0119806467791013	2324.86	EZR
GO_Biological_Process_2021	endothelial cell development (GO:0001885)	Down-regulated Core Proteins	0.003895069234369	0.0119806467791013	2216.11	EZR
GO_Biological_Process_2021	leukocyte cell-cell adhesion (GO:0007159)	Down-regulated Core Proteins	0.0041942719009199	0.0119806467791013	2024.38	EZR
GO_Biological_Process_2021	establishment of endothelial barrier (GO:0061028)	Down-regulated Core Proteins	0.0043438507968609	0.0119806467791013	1939.49	EZR
GO_Biological_Process_2021	regulation of cellular component size (GO:0032535)	Down-regulated Core Proteins	0.0046429637132384	0.0119806467791013	1787.85	EZR
GO_Biological_Process_2021	cellular response to cAMP (GO:0071320)	Down-regulated Core Proteins	0.0046429637132384	0.0119806467791013	1787.85	EZR
GO_Biological_Process_2021	establishment or maintenance of epithelial cell apical/basal polarity (GO:0045197)	Down-regulated Core Proteins	0.0047924977347936	0.0119806467791013	1719.88	EZR
GO_Biological_Process_2021	actin filament bundle assembly (GO:0051017)	Down-regulated Core Proteins	0.0049420167963792	0.0119806467791013	1656.47	EZR
GO_Biological_Process_2021	actin filament bundle organization (GO:0061572)	Down-regulated Core Proteins	0.0049420167963792	0.0119806467791013	1656.47	EZR
GO_Biological_Process_2021	regulation of T cell receptor signaling pathway (GO:0050856)	Down-regulated Core Proteins	0.0052410100460964	0.0122922464128899	1541.63	EZR
GO_Biological_Process_2021	regulation of p38MAPK cascade (GO:1900744)	Down-regulated Core Proteins	0.0055399434616103	0.0122922464128899	1440.46	EZR
GO_Biological_Process_2021	negative regulation of stress-activated MAPK cascade (GO:0032873)	Down-regulated Core Proteins	0.0055399434616103	0.0122922464128899	1440.46	EZR
GO_Biological_Process_2021	response to cAMP (GO:0051591)	Down-regulated Core Proteins	0.0056893877328946	0.0122922464128899	1394.27	EZR
GO_Biological_Process_2021	regulation of cellular component biogenesis (GO:0044087)	Down-regulated Core Proteins	0.0058388170461227	0.0122922464128899	1350.71	EZR
GO_Biological_Process_2021	cortical cytoskeleton organization (GO:0030865)	Down-regulated Core Proteins	0.0061376308005125	0.0125900118984873	1270.59	EZR
GO_Biological_Process_2021	regulation of interleukin-2 production (GO:0032663)	Down-regulated Core Proteins	0.0071830078183245	0.014366015636649	1047.6	EZR
GO_Biological_Process_2021	negative regulation of ERK1 and ERK2 cascade (GO:0070373)	Down-regulated Core Proteins	0.0074815523734162	0.0145348613731343	996.45	EZR
GO_Biological_Process_2021	inositol lipid-mediated signaling (GO:0048017)	Down-regulated Core Proteins	0.0076308022208955	0.0145348613731343	972.53	EZR
GO_Biological_Process_2021	cytoplasmic microtubule organization (GO:0031122)	Down-regulated Core Proteins	0.0080784620472779	0.0150296968321451	906.62	EZR
GO_Biological_Process_2021	actin cytoskeleton reorganization (GO:0031532)	Down-regulated Core Proteins	0.0094206342211661	0.0171284258566657	749.95	EZR
GO_Biological_Process_2021	positive regulation of protein transport (GO:0051222)	Down-regulated Core Proteins	0.0103147430639722	0.0174568268251583	670.29	EZR
GO_Biological_Process_2021	phosphatidylinositol-mediated signaling (GO:0048015)	Down-regulated Core Proteins	0.0106126597969386	0.0174568268251583	647.02	EZR
GO_Biological_Process_2021	gland development (GO:0048732)	Down-regulated Core Proteins	0.0106126597969386	0.0174568268251583	647.02	EZR
GO_Biological_Process_2021	positive regulation of protein secretion (GO:0050714)	Down-regulated Core Proteins	0.0107615957524881	0.0174568268251583	635.92	EZR
GO_Biological_Process_2021	positive regulation of secretion by cell (GO:1903532)	Down-regulated Core Proteins	0.0107615957524881	0.0174568268251583	635.92	EZR
GO_Biological_Process_2021	regulation of actin filament-based process (GO:0032970)	Down-regulated Core Proteins	0.0109105167657239	0.0174568268251583	625.15	EZR
GO_Biological_Process_2021	regulation of organelle assembly (GO:1902115)	Down-regulated Core Proteins	0.0115060514233315	0.0180415782187829	585.16	EZR
GO_Biological_Process_2021	regulation of organelle organization (GO:0033043)	Down-regulated Core Proteins	0.0119525455699436	0.0180415782187829	558.06	EZR
GO_Biological_Process_2021	regulation of NIK/NF-kappaB signaling (GO:1901222)	Down-regulated Core Proteins	0.0119525455699436	0.0180415782187829	558.06	EZR
GO_Biological_Process_2021	positive regulation of protein catabolic process (GO:0045732)	Down-regulated Core Proteins	0.0126964037761181	0.0188094870757305	517.55	EZR
GO_Biological_Process_2021	regulation of actin cytoskeleton organization (GO:0032956)	Down-regulated Core Proteins	0.0135885408650015	0.0197651503490931	475.39	EZR
GO_Biological_Process_2021	negative regulation of MAPK cascade (GO:0043409)	Down-regulated Core Proteins	0.0140344078673636	0.0200491540962337	456.53	EZR
GO_Biological_Process_2021	positive regulation of cellular protein metabolic process (GO:0032270)	Down-regulated Core Proteins	0.0152227298331673	0.0212016592091875	412.2	EZR
GO_Biological_Process_2021	cellular response to organonitrogen compound (GO:0071417)	Down-regulated Core Proteins	0.015371202926661	0.0212016592091875	407.19	EZR
GO_Biological_Process_2021	regulation of cytoskeleton organization (GO:0051493)	Down-regulated Core Proteins	0.0167067894603527	0.0226532738445461	366.54	EZR
GO_Biological_Process_2021	ion transport (GO:0006811)	Down-regulated Core Proteins	0.0172999956867377	0.0230666609156503	350.71	LASP1
GO_Biological_Process_2021	regulation of protein secretion (GO:0050708)	Down-regulated Core Proteins	0.0186338374756652	0.0244378196402167	319.15	EZR
GO_Biological_Process_2021	protein localization to plasma membrane (GO:0072659)	Down-regulated Core Proteins	0.0202624490989434	0.0261450956115398	286.82	EZR
GO_Biological_Process_2021	protein localization to cell periphery (GO:1990778)	Down-regulated Core Proteins	0.0208542245588729	0.026252663981986	276.45	EZR
GO_Biological_Process_2021	positive regulation of cellular catabolic process (GO:0031331)	Down-regulated Core Proteins	0.0210021311855888	0.026252663981986	273.96	EZR
GO_Biological_Process_2021	cellular response to organic cyclic compound (GO:0071407)	Down-regulated Core Proteins	0.0223326207425039	0.0274863024523125	253.21	EZR
GO_Biological_Process_2021	negative regulation of cytokine production (GO:0001818)	Down-regulated Core Proteins	0.0270534883841024	0.0327921071322454	197.61	EZR
GO_Biological_Process_2021	protein localization to membrane (GO:0072657)	Down-regulated Core Proteins	0.028966992043161	0.0345874531858639	180.76	EZR
GO_Biological_Process_2021	axon guidance (GO:0007411)	Down-regulated Core Proteins	0.0301432849570313	0.0354626881847428	171.58	EZR
GO_Biological_Process_2021	regulation of ERK1 and ERK2 cascade (GO:0070372)	Down-regulated Core Proteins	0.0352783986095116	0.0406528971066326	139.42	EZR
GO_Biological_Process_2021	axonogenesis (GO:0007409)	Down-regulated Core Proteins	0.0355712849683035	0.0406528971066326	137.9	EZR
GO_Biological_Process_2021	cellular component assembly (GO:0022607)	Down-regulated Core Proteins	0.0386430138026298	0.0435414240029631	123.48	EZR
GO_Biological_Process_2021	plasma membrane bounded cell projection assembly (GO:0120031)	Down-regulated Core Proteins	0.0411248692084052	0.0456942991204502	113.59	EZR
GO_Molecular_Function_2021	cadherin binding (GO:0045296)	Down-regulated Core Proteins	0.0007669645150287828	0.006902680635259	882.15	LASP1;EZR
GO_Molecular_Function_2021	protein kinase A catalytic subunit binding (GO:0034236)	Down-regulated Core Proteins	0.0019487938770013	0.0087695724465061	5196.55	EZR
GO_Molecular_Function_2021	protein kinase A regulatory subunit binding (GO:0034237)	Down-regulated Core Proteins	0.003296484417552	0.009889453252656	2718.11	EZR
GO_Molecular_Function_2021	ATPase binding (GO:0051117)	Down-regulated Core Proteins	0.0109105167657239	0.0245486627228789	625.15	EZR
GO_Molecular_Function_2021	actin binding (GO:0003779)	Down-regulated Core Proteins	0.0263168566863423	0.0473703420354161	204.83	EZR
GO_Cellular_Component_2021	cortical cytoskeleton (GO:0030863)	Down-regulated Core Proteins	2.474861877676981e-05	0.0004702237567586264	7553.89	LASP1;EZR
GO_Cellular_Component_2021	actin cytoskeleton (GO:0015629)	Down-regulated Core Proteins	0.0007387537330881202	0.0054443114468174	903.98	LASP1;EZR
GO_Cellular_Component_2021	focal adhesion (GO:0005925)	Down-regulated Core Proteins	0.0011060160412099	0.0054443114468174	693.5	LASP1;EZR
GO_Cellular_Component_2021	cell-substrate junction (GO:0030055)	Down-regulated Core Proteins	0.0011461708309089	0.0054443114468174	677.31	LASP1;EZR
GO_Cellular_Component_2021	preribosome, large subunit precursor (GO:0030687)	Down-regulated Core Proteins	0.0034461530563075	0.0130953816139688	2574.28	WDR37
GO_Cellular_Component_2021	cortical actin cytoskeleton (GO:0030864)	Down-regulated Core Proteins	0.0062870152415198	0.018314168616915	1233.69	LASP1
GO_Cellular_Component_2021	cytoplasmic side of plasma membrane (GO:0009898)	Down-regulated Core Proteins	0.0082276520870908	0.018314168616915	886.4	EZR
GO_Cellular_Component_2021	microvillus (GO:0005902)	Down-regulated Core Proteins	0.0085259873136886	0.018314168616915	848.32	EZR
GO_Cellular_Component_2021	filopodium (GO:0030175)	Down-regulated Core Proteins	0.0086751325027492	0.018314168616915	830.36	EZR
GO_Cellular_Component_2021	actin filament (GO:0005884)	Down-regulated Core Proteins	0.0107615957524881	0.0196316000516299	635.92	EZR
GO_Cellular_Component_2021	plasma membrane raft (GO:0044853)	Down-regulated Core Proteins	0.012250133655514	0.0196316000516299	541.2	EZR
GO_Cellular_Component_2021	actin-based cell projection (GO:0098858)	Down-regulated Core Proteins	0.0123989052957663	0.0196316000516299	533.11	EZR
GO_Cellular_Component_2021	basolateral plasma membrane (GO:0016323)	Down-regulated Core Proteins	0.0224803784730512	0.0328559377683057	251.07	EZR
GO_Cellular_Component_2021	membrane raft (GO:0045121)	Down-regulated Core Proteins	0.0242523103555676	0.0329138497682703	227.69	EZR
GO_Cellular_Component_2021	vesicle (GO:0031982)	Down-regulated Core Proteins	0.0335198352152786	0.0424584579393529	149.2	EZR
GO_Cellular_Component_2021	polymeric cytoskeletal fiber (GO:0099513)	Down-regulated Core Proteins	0.0379122422328197	0.0450207876514734	126.68	EZR
KEGG_2021_Human	Gastric acid secretion	Down-regulated Core Proteins	0.0113571901659932	0.0377373187843669	594.73	EZR
KEGG_2021_Human	Leukocyte transendothelial migration	Down-regulated Core Proteins	0.0170034223995669	0.0377373187843669	358.47	EZR
KEGG_2021_Human	Tight junction	Down-regulated Core Proteins	0.0251374728576962	0.0377373187843669	217.38	EZR
KEGG_2021_Human	Pathogenic Escherichia coli infection	Down-regulated Core Proteins	0.0292611543756679	0.0377373187843669	178.39	EZR
KEGG_2021_Human	Proteoglycans in cancer	Down-regulated Core Proteins	0.0304372096910158	0.0377373187843669	169.41	EZR
KEGG_2021_Human	Regulation of actin cytoskeleton	Down-regulated Core Proteins	0.0323462732437431	0.0377373187843669	156.38	EZR
KEGG_2021_Human	MicroRNAs in cancer	Down-regulated Core Proteins	0.0457850030466385	0.0457850030466385	98.24	EZR

## Sheet: Suppl table S7B
Supplementary Table S7B: An enrichment analysis was performed for KEGG pathway and the main three branches of the Gene Ontology (Biological Processes, Molecular Functions, and Cellular Components) of the differentially abundant proteins under the perturbation of 0.1uM BPA using a Benjamini-Hochberg threshold=0.05 (correcting for multiple comparisons).
Library	Term	Group	p-value	Adjusted p-value	Combined Score	Genes
GO_Biological_Process_2021	glucose catabolic process to pyruvate (GO:0061718)	Tot Proteins	7.796208229167352e-10	1.6382030065301806e-07	3335.32	TPI1;PGAM1;ENO1;ENO2;ALDOA
GO_Biological_Process_2021	canonical glycolysis (GO:0061621)	Tot Proteins	7.796208229167352e-10	1.6382030065301806e-07	3335.32	TPI1;PGAM1;ENO1;ENO2;ALDOA
GO_Biological_Process_2021	glycolytic process through glucose-6-phosphate (GO:0061620)	Tot Proteins	9.731899048694142e-10	1.6382030065301806e-07	3134.89	TPI1;PGAM1;ENO1;ENO2;ALDOA
GO_Biological_Process_2021	glucose metabolic process (GO:0006006)	Tot Proteins	1.7689046813524502e-09	2.1849762332355945e-07	1343.18	TPI1;PGAM1;GAA;ENO1;ALDOA;ENO2
GO_Biological_Process_2021	glycolytic process (GO:0006096)	Tot Proteins	2.163342805183757e-09	2.1849762332355945e-07	2511.33	TPI1;PGAM1;ENO1;ENO2;ALDOA
GO_Biological_Process_2021	gluconeogenesis (GO:0006094)	Tot Proteins	1.3428484029514089e-08	9.687692049863733e-07	1520.1	TPI1;PGAM1;ENO1;ALDOA;ENO2
GO_Biological_Process_2021	carbohydrate catabolic process (GO:0016052)	Tot Proteins	1.3428484029514089e-08	9.687692049863733e-07	1520.1	TPI1;PGAM1;ENO1;ALDOA;ENO2
GO_Biological_Process_2021	hexose biosynthetic process (GO:0019319)	Tot Proteins	1.938013626505553e-08	1.2233711017316303e-06	1374.56	TPI1;PGAM1;ENO1;ALDOA;ENO2
GO_Biological_Process_2021	pyruvate metabolic process (GO:0006090)	Tot Proteins	6.114778301461662e-08	3.431070046931266e-06	1002.24	TPI1;PGAM1;ENO1;ALDOA;ENO2
GO_Biological_Process_2021	Wnt signaling pathway (GO:0016055)	Tot Proteins	2.745407521784889e-05	0.0013864307985013	279.06	SFRP2;WNT8B;GPC4;WLS
GO_Biological_Process_2021	neutrophil degranulation (GO:0043312)	Tot Proteins	0.00026935704081615115	0.0113063532891528	63.23	PGAM1;GAA;COTL1;MIF;ALDOA;CTSB
GO_Biological_Process_2021	neutrophil activation involved in immune response (GO:0002283)	Tot Proteins	0.0002815931060235225	0.0113063532891528	62.35	PGAM1;GAA;COTL1;MIF;ALDOA;CTSB
GO_Biological_Process_2021	neutrophil mediated immunity (GO:0002446)	Tot Proteins	0.0002910546391267082	0.0113063532891528	61.7	PGAM1;GAA;COTL1;MIF;ALDOA;CTSB
GO_Biological_Process_2021	synaptic membrane adhesion (GO:0099560)	Tot Proteins	0.000315297453838473	0.0113732295848877	744.61	GPC4;PTPRF
GO_Biological_Process_2021	nuclear transport (GO:0051169)	Tot Proteins	0.0004147817481844797	0.0139643188555441	616.47	NUTF2;BANF1
GO_Biological_Process_2021	regulation of vacuole organization (GO:0044088)	Tot Proteins	0.0007927368818969882	0.0250207578348736	395.52	ENO1;ENO2
GO_Biological_Process_2021	negative regulation of intrinsic apoptotic signaling pathway in response to DNA damage (GO:1902230)	Tot Proteins	0.0011099934165052	0.0329733338432448	314.0	SFRP2;MIF
GO_Biological_Process_2021	microtubule polymerization or depolymerization (GO:0031109)	Tot Proteins	0.0011973586786605	0.033592562929088	298.06	TPPP3;STMN1
GO_Biological_Process_2021	negative regulation of response to DNA damage stimulus (GO:2001021)	Tot Proteins	0.0015786688417766	0.0419593560577488	246.34	SFRP2;MIF
GO_Biological_Process_2021	lytic vacuole organization (GO:0080171)	Tot Proteins	0.0017882687435073	0.0451537857735597	225.97	GAA;TPP1
GO_Biological_Process_2021	regulation of protein polymerization (GO:0032271)	Tot Proteins	0.0020103738257067	0.0483447039039015	208.33	TPPP3;COTL1
GO_Molecular_Function_2021	tubulin binding (GO:0015631)	Tot Proteins	0.0002732883352006467	0.0204966251400485	80.93	TPPP3;STMN1;NEFM;ALDOA;EZR
GO_Cellular_Component_2021	ficolin-1-rich granule (GO:0101002)	Tot Proteins	1.207836640611891e-06	0.00010914576586168184	283.98	PGAM1;GAA;COTL1;MIF;ALDOA;CTSB
GO_Cellular_Component_2021	cytoplasmic vesicle lumen (GO:0060205)	Tot Proteins	2.483981482722935e-06	0.00010914576586168184	352.9	TF;PGAM1;COTL1;MIF;ALDOA
GO_Cellular_Component_2021	ficolin-1-rich granule lumen (GO:1904813)	Tot Proteins	3.458783086087963e-06	0.00010914576586168184	320.4	PGAM1;COTL1;MIF;ALDOA;CTSB
GO_Cellular_Component_2021	cortical cytoskeleton (GO:0030863)	Tot Proteins	4.365830634467273e-06	0.00010914576586168184	535.29	LASP1;COTL1;EZR;LLGL1
GO_Cellular_Component_2021	lysosomal lumen (GO:0043202)	Tot Proteins	2.103588591270646e-05	0.0004207177182541292	307.16	GAA;TPP1;GPC4;CTSB
GO_Cellular_Component_2021	cortical actin cytoskeleton (GO:0030864)	Tot Proteins	6.901721319653771e-05	0.0011502868866089	419.53	LASP1;COTL1;LLGL1
GO_Cellular_Component_2021	intracellular organelle lumen (GO:0070013)	Tot Proteins	0.00015922012924347916	0.0022745732749068	53.09	TF;PGAM1;COTL1;MIF;GPC4;ALDOA;PRSS23;CTSB
GO_Cellular_Component_2021	actin cytoskeleton (GO:0015629)	Tot Proteins	0.0003121698115826855	0.0034685534620298	77.28	LASP1;COTL1;ALDOA;EZR;LLGL1
GO_Cellular_Component_2021	secretory granule lumen (GO:0034774)	Tot Proteins	0.0003121698115826855	0.0034685534620298	77.28	TF;PGAM1;COTL1;MIF;ALDOA
GO_Cellular_Component_2021	polymeric cytoskeletal fiber (GO:0099513)	Tot Proteins	0.0013747681972468	0.0137476819724686	60.63	TPPP3;COTL1;KIF11;EZR
GO_Cellular_Component_2021	vacuolar lumen (GO:0005775)	Tot Proteins	0.0035128932325134	0.0319353930228497	60.72	GAA;TPP1;GPC4
GO_Cellular_Component_2021	filopodium (GO:0030175)	Tot Proteins	0.005433757630856	0.042267610676787	102.99	GAP43;EZR
GO_Cellular_Component_2021	endocytic vesicle (GO:0030139)	Tot Proteins	0.0054947893879823	0.042267610676787	47.43	TF;RALA;WLS
KEGG_2021_Human	Glycolysis / Gluconeogenesis	Tot Proteins	1.669784105466989e-07	9.851726222255235e-06	758.91	TPI1;PGAM1;ENO1;ALDOA;ENO2
KEGG_2021_Human	HIF-1 signaling pathway	Tot Proteins	5.341383225597328e-05	0.0015757080515512	218.87	TF;ENO1;ALDOA;ENO2
KEGG_2021_Human	Fructose and mannose metabolism	Tot Proteins	0.0017882687435073	0.0270513015654696	225.97	TPI1;ALDOA
KEGG_2021_Human	Lysosome	Tot Proteins	0.0018339865468115	0.0270513015654696	85.71	GAA;TPP1;CTSB
KEGG_2021_Human	Wnt signaling pathway	Tot Proteins	0.0038276207836102	0.0451659252466015	57.94	SFRP2;WNT8B;GPC4
GO_Biological_Process_2021	glucose catabolic process to pyruvate (GO:0061718)	Tot Core Proteins	4.001194529809648e-13	3.567009342729415e-11	30005.92	TPI1;PGAM1;ENO1;ENO2;ALDOA
GO_Biological_Process_2021	canonical glycolysis (GO:0061621)	Tot Core Proteins	4.001194529809648e-13	3.567009342729415e-11	30005.92	TPI1;PGAM1;ENO1;ENO2;ALDOA
GO_Biological_Process_2021	glycolytic process through glucose-6-phosphate (GO:0061620)	Tot Core Proteins	5.000480387003853e-13	3.567009342729415e-11	28281.59	TPI1;PGAM1;ENO1;ENO2;ALDOA
GO_Biological_Process_2021	glycolytic process (GO:0006096)	Tot Core Proteins	1.1167880763243245e-12	5.974816208335136e-11	22894.82	TPI1;PGAM1;ENO1;ENO2;ALDOA
GO_Biological_Process_2021	gluconeogenesis (GO:0006094)	Tot Core Proteins	7.030145691953439e-12	2.5074186301300597e-10	14234.3	TPI1;PGAM1;ENO1;ENO2;ALDOA
GO_Biological_Process_2021	carbohydrate catabolic process (GO:0016052)	Tot Core Proteins	7.030145691953439e-12	2.5074186301300597e-10	14234.3	TPI1;PGAM1;ENO1;ENO2;ALDOA
GO_Biological_Process_2021	hexose biosynthetic process (GO:0019319)	Tot Core Proteins	1.018161854388298e-11	3.112666240558511e-10	12947.91	TPI1;PGAM1;ENO1;ENO2;ALDOA
GO_Biological_Process_2021	pyruvate metabolic process (GO:0006090)	Tot Core Proteins	3.254041105808324e-11	8.704559958037265e-10	9630.44	TPI1;PGAM1;ENO1;ENO2;ALDOA
GO_Biological_Process_2021	glucose metabolic process (GO:0006006)	Tot Core Proteins	6.0442339045984e-11	1.4371845062045087e-09	8228.25	TPI1;PGAM1;ENO1;ENO2;ALDOA
GO_Biological_Process_2021	regulation of vacuole organization (GO:0044088)	Tot Core Proteins	5.1698634856081705e-05	0.0011063507859201	2463.82	ENO1;ENO2
GO_Biological_Process_2021	neutrophil degranulation (GO:0043312)	Tot Core Proteins	0.0014624145381141	0.0240750999199271	114.2	PGAM1;MIF;ALDOA
GO_Biological_Process_2021	neutrophil activation involved in immune response (GO:0002283)	Tot Core Proteins	0.0014976901417846	0.0240750999199271	112.81	PGAM1;MIF;ALDOA
GO_Biological_Process_2021	neutrophil mediated immunity (GO:0002446)	Tot Core Proteins	0.0015244987392993	0.0240750999199271	111.79	PGAM1;MIF;ALDOA
GO_Biological_Process_2021	protein homooligomerization (GO:0051260)	Tot Core Proteins	0.0015825006890192	0.0240750999199271	269.21	MIF;ALDOA
GO_Biological_Process_2021	regulation of phosphorylation (GO:0042325)	Tot Core Proteins	0.0016875070037332	0.0240750999199271	257.81	PGAM1;MIF
GO_Biological_Process_2021	negative regulation of macrophage chemotaxis (GO:0010760)	Tot Core Proteins	0.0024977078641967	0.0252961747107188	3326.77	MIF
GO_Biological_Process_2021	positive regulation of plasminogen activation (GO:0010756)	Tot Core Proteins	0.0029965781728721	0.0252961747107188	2580.41	ENO1
GO_Biological_Process_2021	negative regulation of cellular response to hypoxia (GO:1900038)	Tot Core Proteins	0.0029965781728721	0.0252961747107188	2580.41	ENO1
GO_Biological_Process_2021	protein localization to nuclear envelope (GO:0090435)	Tot Core Proteins	0.0029965781728721	0.0252961747107188	2580.41	NUTF2
GO_Biological_Process_2021	establishment of centrosome localization (GO:0051660)	Tot Core Proteins	0.0034952242970889	0.0252961747107188	2093.27	EZR
GO_Biological_Process_2021	sphingosine-1-phosphate receptor signaling pathway (GO:0003376)	Tot Core Proteins	0.0034952242970889	0.0252961747107188	2093.27	EZR
GO_Biological_Process_2021	aldehyde biosynthetic process (GO:0046184)	Tot Core Proteins	0.0034952242970889	0.0252961747107188	2093.27	TPI1
GO_Biological_Process_2021	gland morphogenesis (GO:0022612)	Tot Core Proteins	0.0034952242970889	0.0252961747107188	2093.27	EZR
GO_Biological_Process_2021	creatine metabolic process (GO:0006600)	Tot Core Proteins	0.0034952242970889	0.0252961747107188	2093.27	CKB
GO_Biological_Process_2021	glyceraldehyde-3-phosphate metabolic process (GO:0019682)	Tot Core Proteins	0.0034952242970889	0.0252961747107188	2093.27	TPI1
GO_Biological_Process_2021	negative regulation of p38MAPK cascade (GO:1903753)	Tot Core Proteins	0.0034952242970889	0.0252961747107188	2093.27	EZR
GO_Biological_Process_2021	positive regulation of protein localization to early endosome (GO:1902966)	Tot Core Proteins	0.0039936462613403	0.0252961747107188	1751.86	EZR
GO_Biological_Process_2021	positive regulation of protein localization to endosome (GO:1905668)	Tot Core Proteins	0.0039936462613403	0.0252961747107188	1751.86	EZR
GO_Biological_Process_2021	fructose metabolic process (GO:0006000)	Tot Core Proteins	0.0039936462613403	0.0252961747107188	1751.86	ALDOA
GO_Biological_Process_2021	positive regulation of early endosome to late endosome transport (GO:2000643)	Tot Core Proteins	0.0039936462613403	0.0252961747107188	1751.86	EZR
GO_Biological_Process_2021	negative regulation of macrophage migration (GO:1905522)	Tot Core Proteins	0.0039936462613403	0.0252961747107188	1751.86	MIF
GO_Biological_Process_2021	regulation of protein localization to early endosome (GO:1902965)	Tot Core Proteins	0.0039936462613403	0.0252961747107188	1751.86	EZR
GO_Biological_Process_2021	positive regulation of muscle contraction (GO:0045933)	Tot Core Proteins	0.0039936462613403	0.0252961747107188	1751.86	ENO1
GO_Biological_Process_2021	ketone biosynthetic process (GO:0042181)	Tot Core Proteins	0.0044918441075108	0.0252961747107188	1500.17	TPI1
GO_Biological_Process_2021	positive regulation of ATP biosynthetic process (GO:2001171)	Tot Core Proteins	0.0044918441075108	0.0252961747107188	1500.17	ENO1
GO_Biological_Process_2021	positive regulation of protein kinase A signaling (GO:0010739)	Tot Core Proteins	0.0044918441075108	0.0252961747107188	1500.17	MIF
GO_Biological_Process_2021	fructose 1,6-bisphosphate metabolic process (GO:0030388)	Tot Core Proteins	0.0044918441075108	0.0252961747107188	1500.17	ALDOA
GO_Biological_Process_2021	astral microtubule organization (GO:0030953)	Tot Core Proteins	0.0044918441075108	0.0252961747107188	1500.17	EZR
GO_Biological_Process_2021	modulation by symbiont of host process (GO:0044003)	Tot Core Proteins	0.0049898178893478	0.027082749608343	1307.49	ENO1
GO_Biological_Process_2021	establishment of epithelial cell apical/basal polarity (GO:0045198)	Tot Core Proteins	0.0054875676690229	0.027082749608343	1155.57	EZR
GO_Biological_Process_2021	positive regulation of cytoplasmic transport (GO:1903651)	Tot Core Proteins	0.0054875676690229	0.027082749608343	1155.57	EZR
GO_Biological_Process_2021	glycerol metabolic process (GO:0006071)	Tot Core Proteins	0.0054875676690229	0.027082749608343	1155.57	TPI1
GO_Biological_Process_2021	regulation of ERK1 and ERK2 cascade (GO:0070372)	Tot Core Proteins	0.0059585913720441	0.027082749608343	107.2	MIF;EZR
GO_Biological_Process_2021	negative regulation of leukocyte chemotaxis (GO:0002689)	Tot Core Proteins	0.0059850935124877	0.027082749608343	1032.95	MIF
GO_Biological_Process_2021	regulation of plasminogen activation (GO:0010755)	Tot Core Proteins	0.0059850935124877	0.027082749608343	1032.95	ENO1
GO_Biological_Process_2021	positive regulation of purine nucleotide biosynthetic process (GO:1900373)	Tot Core Proteins	0.006482395492037	0.027082749608343	932.06	ENO1
GO_Biological_Process_2021	negative regulation of intrinsic apoptotic signaling pathway in response to DNA damage by p53 class mediator (GO:1902166)	Tot Core Proteins	0.006482395492037	0.027082749608343	932.06	MIF
GO_Biological_Process_2021	regulation of cell aging (GO:0090342)	Tot Core Proteins	0.006482395492037	0.027082749608343	932.06	MIF
GO_Biological_Process_2021	negative regulation of DNA damage response, signal transduction by p53 class mediator (GO:0043518)	Tot Core Proteins	0.0069794736802133	0.027082749608343	847.7	MIF
GO_Biological_Process_2021	regulation of intrinsic apoptotic signaling pathway in response to DNA damage by p53 class mediator (GO:1902165)	Tot Core Proteins	0.0069794736802133	0.027082749608343	847.7	MIF
GO_Biological_Process_2021	microvillus organization (GO:0032528)	Tot Core Proteins	0.0069794736802133	0.027082749608343	847.7	EZR
GO_Biological_Process_2021	polarized epithelial cell differentiation (GO:0030859)	Tot Core Proteins	0.0069794736802133	0.027082749608343	847.7	EZR
GO_Biological_Process_2021	establishment of apical/basal cell polarity (GO:0035089)	Tot Core Proteins	0.0074763281564485	0.027082749608343	776.21	EZR
GO_Biological_Process_2021	protein trimerization (GO:0070206)	Tot Core Proteins	0.0074763281564485	0.027082749608343	776.21	MIF
GO_Biological_Process_2021	microvillus assembly (GO:0030033)	Tot Core Proteins	0.0074763281564485	0.027082749608343	776.21	EZR
GO_Biological_Process_2021	prostanoid biosynthetic process (GO:0046457)	Tot Core Proteins	0.0074763281564485	0.027082749608343	776.21	MIF
GO_Biological_Process_2021	protein homotrimerization (GO:0070207)	Tot Core Proteins	0.0074763281564485	0.027082749608343	776.21	MIF
GO_Biological_Process_2021	protein kinase A signaling (GO:0010737)	Tot Core Proteins	0.0074763281564485	0.027082749608343	776.21	EZR
GO_Biological_Process_2021	filopodium assembly (GO:0046847)	Tot Core Proteins	0.0079729589968486	0.027082749608343	714.91	EZR
GO_Biological_Process_2021	regulation of leukocyte activation (GO:0002694)	Tot Core Proteins	0.0079729589968486	0.027082749608343	714.91	MIF
GO_Biological_Process_2021	regulation of ATP biosynthetic process (GO:2001169)	Tot Core Proteins	0.0079729589968486	0.027082749608343	714.91	ENO1
GO_Biological_Process_2021	nuclear transport (GO:0051169)	Tot Core Proteins	0.0079729589968486	0.027082749608343	714.91	NUTF2
GO_Biological_Process_2021	regulation of phosphate metabolic process (GO:0019220)	Tot Core Proteins	0.0079729589968486	0.027082749608343	714.91	PGAM1
GO_Biological_Process_2021	negative regulation of cell aging (GO:0090344)	Tot Core Proteins	0.0084693662805775	0.0278837597545169	661.82	MIF
GO_Biological_Process_2021	negative regulation of intrinsic apoptotic signaling pathway by p53 class mediator (GO:1902254)	Tot Core Proteins	0.0084693662805775	0.0278837597545169	661.82	MIF
GO_Biological_Process_2021	negative regulation of signal transduction by p53 class mediator (GO:1901797)	Tot Core Proteins	0.0089655500933473	0.0282151135290637	615.43	MIF
GO_Biological_Process_2021	regulation of cellular protein catabolic process (GO:1903362)	Tot Core Proteins	0.0089655500933473	0.0282151135290637	615.43	EZR
GO_Biological_Process_2021	regulation of early endosome to late endosome transport (GO:2000641)	Tot Core Proteins	0.0089655500933473	0.0282151135290637	615.43	EZR
GO_Biological_Process_2021	negative regulation of T cell receptor signaling pathway (GO:0050860)	Tot Core Proteins	0.0094615105123957	0.0285177922486294	574.57	EZR
GO_Biological_Process_2021	positive regulation of cellular protein catabolic process (GO:1903364)	Tot Core Proteins	0.0094615105123957	0.0285177922486294	574.57	EZR
GO_Biological_Process_2021	prostaglandin biosynthetic process (GO:0001516)	Tot Core Proteins	0.0094615105123957	0.0285177922486294	574.57	MIF
GO_Biological_Process_2021	establishment of epithelial cell polarity (GO:0090162)	Tot Core Proteins	0.0099572476243861	0.0287952836705222	538.34	EZR
GO_Biological_Process_2021	positive regulation of protein processing (GO:0010954)	Tot Core Proteins	0.0099572476243861	0.0287952836705222	538.34	ENO1
GO_Biological_Process_2021	regulation of protein kinase A signaling (GO:0010738)	Tot Core Proteins	0.0099572476243861	0.0287952836705222	538.34	MIF
GO_Biological_Process_2021	regulation of macrophage chemotaxis (GO:0010758)	Tot Core Proteins	0.0109480522580432	0.0308274103055429	476.99	MIF
GO_Biological_Process_2021	negative regulation of interleukin-2 production (GO:0032703)	Tot Core Proteins	0.0109480522580432	0.0308274103055429	476.99	EZR
GO_Biological_Process_2021	regulation of cell size (GO:0008361)	Tot Core Proteins	0.0119379646683197	0.0331782394677978	427.12	EZR
GO_Biological_Process_2021	positive regulation of multicellular organismal process (GO:0051240)	Tot Core Proteins	0.0121840054754284	0.0334279124582268	63.12	MIF;ENO1
GO_Biological_Process_2021	negative regulation of antigen receptor-mediated signaling pathway (GO:0050858)	Tot Core Proteins	0.0124325865055395	0.0336781457238666	405.55	EZR
GO_Biological_Process_2021	negative regulation of intrinsic apoptotic signaling pathway in response to DNA damage (GO:1902230)	Tot Core Proteins	0.0129269855424658	0.0341527766183666	385.85	MIF
GO_Biological_Process_2021	endothelial cell development (GO:0001885)	Tot Core Proteins	0.0129269855424658	0.0341527766183666	385.85	EZR
GO_Biological_Process_2021	protein export from nucleus (GO:0006611)	Tot Core Proteins	0.0134211618656948	0.0342279854082027	367.79	NUTF2
GO_Biological_Process_2021	leukocyte cell-cell adhesion (GO:0007159)	Tot Core Proteins	0.0139151155631478	0.0342279854082027	351.18	EZR
GO_Biological_Process_2021	positive regulation of fibroblast proliferation (GO:0048146)	Tot Core Proteins	0.0139151155631478	0.0342279854082027	351.18	MIF
GO_Biological_Process_2021	regulation of muscle contraction (GO:0006937)	Tot Core Proteins	0.0139151155631478	0.0342279854082027	351.18	ENO1
GO_Biological_Process_2021	carbohydrate derivative biosynthetic process (GO:1901137)	Tot Core Proteins	0.0139151155631478	0.0342279854082027	351.18	TPI1
GO_Biological_Process_2021	regulation of DNA damage response, signal transduction by p53 class mediator (GO:0043516)	Tot Core Proteins	0.0139151155631478	0.0342279854082027	351.18	MIF
GO_Biological_Process_2021	establishment of endothelial barrier (GO:0061028)	Tot Core Proteins	0.0144088467211374	0.0346807088168395	335.86	EZR
GO_Biological_Process_2021	positive regulation of B cell proliferation (GO:0030890)	Tot Core Proteins	0.0149023554252653	0.0346807088168395	321.69	MIF
GO_Biological_Process_2021	positive regulation of phosphate metabolic process (GO:0045937)	Tot Core Proteins	0.0149023554252653	0.0346807088168395	321.69	MIF
GO_Biological_Process_2021	regulation of macrophage activation (GO:0043030)	Tot Core Proteins	0.0149023554252653	0.0346807088168395	321.69	MIF
GO_Biological_Process_2021	negative regulation of response to DNA damage stimulus (GO:2001021)	Tot Core Proteins	0.0153956417644848	0.0346807088168395	308.54	MIF
GO_Biological_Process_2021	regulation of cellular component size (GO:0032535)	Tot Core Proteins	0.0153956417644848	0.0346807088168395	308.54	EZR
GO_Biological_Process_2021	prostaglandin metabolic process (GO:0006693)	Tot Core Proteins	0.0153956417644848	0.0346807088168395	308.54	MIF
GO_Biological_Process_2021	cellular response to cAMP (GO:0071320)	Tot Core Proteins	0.0153956417644848	0.0346807088168395	308.54	EZR
GO_Biological_Process_2021	establishment or maintenance of epithelial cell apical/basal polarity (GO:0045197)	Tot Core Proteins	0.0158887058240637	0.0350534334675221	296.32	EZR
GO_Biological_Process_2021	regulation of cellular amide metabolic process (GO:0034248)	Tot Core Proteins	0.0158887058240637	0.0350534334675221	296.32	PGAM1
GO_Biological_Process_2021	actin filament bundle assembly (GO:0051017)	Tot Core Proteins	0.0163815476907073	0.0350565120581136	284.93	EZR
GO_Biological_Process_2021	actin filament bundle organization (GO:0061572)	Tot Core Proteins	0.0163815476907073	0.0350565120581136	284.93	EZR
GO_Biological_Process_2021	positive regulation of ATP metabolic process (GO:1903580)	Tot Core Proteins	0.0163815476907073	0.0350565120581136	284.93	ENO1
GO_Biological_Process_2021	regulation of T cell receptor signaling pathway (GO:0050856)	Tot Core Proteins	0.0173665651965465	0.0364357348241269	264.33	EZR
GO_Biological_Process_2021	oxoacid metabolic process (GO:0043436)	Tot Core Proteins	0.0173665651965465	0.0364357348241269	264.33	MIF
GO_Biological_Process_2021	negative regulation of stress-activated MAPK cascade (GO:0032873)	Tot Core Proteins	0.0183506949831896	0.0377600839077171	246.23	EZR
GO_Biological_Process_2021	regulation of p38MAPK cascade (GO:1900744)	Tot Core Proteins	0.0183506949831896	0.0377600839077171	246.23	EZR
GO_Biological_Process_2021	response to cAMP (GO:0051591)	Tot Core Proteins	0.0188424272009397	0.0384026611523914	237.98	EZR
GO_Biological_Process_2021	organophosphate biosynthetic process (GO:0090407)	Tot Core Proteins	0.0193339377497966	0.0386678754995933	230.2	TPI1
GO_Biological_Process_2021	regulation of cellular component biogenesis (GO:0044087)	Tot Core Proteins	0.0193339377497966	0.0386678754995933	230.2	EZR
GO_Biological_Process_2021	nucleocytoplasmic transport (GO:0006913)	Tot Core Proteins	0.019825226718581	0.0389229221814343	222.86	NUTF2
GO_Biological_Process_2021	carboxylic acid metabolic process (GO:0019752)	Tot Core Proteins	0.019825226718581	0.0389229221814343	222.86	MIF
GO_Biological_Process_2021	cortical cytoskeleton organization (GO:0030865)	Tot Core Proteins	0.0203162941970357	0.0391683509744652	215.92	EZR
GO_Biological_Process_2021	hexose metabolic process (GO:0019318)	Tot Core Proteins	0.0203162941970357	0.0391683509744652	215.92	ALDOA
GO_Biological_Process_2021	regulation of purine nucleotide metabolic process (GO:1900542)	Tot Core Proteins	0.0212977650246516	0.0399800150462758	203.13	PGAM1
GO_Biological_Process_2021	substantia nigra development (GO:0021762)	Tot Core Proteins	0.0212977650246516	0.0399800150462758	203.13	CKB
GO_Biological_Process_2021	regulation of carbohydrate catabolic process (GO:0043470)	Tot Core Proteins	0.0212977650246516	0.0399800150462758	203.13	PGAM1
GO_Biological_Process_2021	regulation of fibroblast proliferation (GO:0048145)	Tot Core Proteins	0.0227683122669265	0.0416147277466578	186.27	MIF
GO_Biological_Process_2021	regulation of B cell proliferation (GO:0030888)	Tot Core Proteins	0.0227683122669265	0.0416147277466578	186.27	MIF
GO_Biological_Process_2021	interleukin-12-mediated signaling pathway (GO:0035722)	Tot Core Proteins	0.0227683122669265	0.0416147277466578	186.27	MIF
GO_Biological_Process_2021	positive regulation of gene expression (GO:0010628)	Tot Core Proteins	0.0229464386640449	0.0416147277466578	38.36	MIF;EZR
GO_Biological_Process_2021	cellular response to interleukin-12 (GO:0071349)	Tot Core Proteins	0.0237475721230066	0.0423498369526951	176.34	MIF
GO_Biological_Process_2021	regulation of interleukin-2 production (GO:0032663)	Tot Core Proteins	0.0237475721230066	0.0423498369526951	176.34	EZR
GO_Biological_Process_2021	regulation of generation of precursor metabolites and energy (GO:0043467)	Tot Core Proteins	0.024725948817258	0.04337174628601	167.3	PGAM1
GO_Biological_Process_2021	negative regulation of ERK1 and ERK2 cascade (GO:0070373)	Tot Core Proteins	0.024725948817258	0.04337174628601	167.3	EZR
GO_Biological_Process_2021	inositol lipid-mediated signaling (GO:0048017)	Tot Core Proteins	0.0252148061968427	0.043869662814019	163.08	EZR
GO_Biological_Process_2021	protein homotetramerization (GO:0051289)	Tot Core Proteins	0.0257034430516592	0.0443591678472184	159.04	ALDOA
GO_Biological_Process_2021	positive regulation of B cell activation (GO:0050871)	Tot Core Proteins	0.0261918594705427	0.0448404634135692	155.17	MIF
GO_Biological_Process_2021	striated muscle contraction (GO:0006941)	Tot Core Proteins	0.0266800555326239	0.0449569439683584	151.46	ALDOA
GO_Biological_Process_2021	cytoplasmic microtubule organization (GO:0031122)	Tot Core Proteins	0.0266800555326239	0.0449569439683584	151.46	EZR
GO_Biological_Process_2021	regulation of ATP metabolic process (GO:1903578)	Tot Core Proteins	0.0276557869621033	0.0462370188272664	144.5	PGAM1
GO_Molecular_Function_2021	cadherin binding (GO:0045296)	Tot Core Proteins	1.2828665110208657e-05	0.0003976886184164683	464.53	LASP1;ENO1;EZR;ALDOA
GO_Molecular_Function_2021	hydro-lyase activity (GO:0016836)	Tot Core Proteins	0.00032944057318529184	0.005106328884372	754.04	ENO1;ENO2
GO_Molecular_Function_2021	phosphotransferase activity, nitrogenous group as acceptor (GO:0016775)	Tot Core Proteins	0.0024977078641967	0.0139247167332835	3326.77	CKB
GO_Molecular_Function_2021	creatine kinase activity (GO:0004111)	Tot Core Proteins	0.0024977078641967	0.0139247167332835	3326.77	CKB
GO_Molecular_Function_2021	fructose binding (GO:0070061)	Tot Core Proteins	0.0029965781728721	0.0139247167332835	2580.41	ALDOA
GO_Molecular_Function_2021	actin binding (GO:0003779)	Tot Core Proteins	0.0033448331590871	0.0139247167332835	161.36	EZR;ALDOA
GO_Molecular_Function_2021	aldehyde-lyase activity (GO:0016832)	Tot Core Proteins	0.0039936462613403	0.0139247167332835	1751.86	ALDOA
GO_Molecular_Function_2021	intramolecular oxidoreductase activity, interconverting aldoses and ketoses (GO:0016861)	Tot Core Proteins	0.0039936462613403	0.0139247167332835	1751.86	TPI1
GO_Molecular_Function_2021	GTPase binding (GO:0051020)	Tot Core Proteins	0.0042887731676215	0.0139247167332835	135.55	NUTF2;ENO1
GO_Molecular_Function_2021	intramolecular transferase activity, phosphotransferases (GO:0016868)	Tot Core Proteins	0.0044918441075108	0.0139247167332835	1500.17	PGAM1
GO_Molecular_Function_2021	intramolecular oxidoreductase activity, transposing C=C bonds (GO:0016863)	Tot Core Proteins	0.006482395492037	0.016746188354429	932.06	MIF
GO_Molecular_Function_2021	protein kinase A catalytic subunit binding (GO:0034236)	Tot Core Proteins	0.006482395492037	0.016746188354429	932.06	EZR
GO_Molecular_Function_2021	ubiquitin protein ligase binding (GO:0031625)	Tot Core Proteins	0.0073373307967401	0.0174967118999189	92.16	TPI1;CKB
GO_Molecular_Function_2021	ubiquitin-like protein ligase binding (GO:0044389)	Tot Core Proteins	0.0082731867865232	0.0183191993130158	84.38	TPI1;CKB
GO_Molecular_Function_2021	tubulin binding (GO:0015631)	Tot Core Proteins	0.0097426841283031	0.0201348805318265	74.73	EZR;ALDOA
GO_Molecular_Function_2021	protein kinase A regulatory subunit binding (GO:0034237)	Tot Core Proteins	0.0109480522580432	0.0212118512499588	476.99	EZR
GO_Molecular_Function_2021	chemoattractant activity (GO:0042056)	Tot Core Proteins	0.0158887058240637	0.0289735223850574	296.32	MIF
GO_Molecular_Function_2021	protein kinase binding (GO:0019901)	Tot Core Proteins	0.0251293382387718	0.0432783047445515	35.61	PGAM1;EZR
GO_Molecular_Function_2021	RNA binding (GO:0003723)	Tot Core Proteins	0.0286248284251884	0.0467036674305706	20.18	ENO1;EZR;ALDOA
GO_Cellular_Component_2021	cytoplasmic vesicle lumen (GO:0060205)	Tot Core Proteins	2.157871492289579e-05	0.00038269165735505326	817.21	PGAM1;MIF;ALDOA
GO_Cellular_Component_2021	ficolin-1-rich granule lumen (GO:1904813)	Tot Core Proteins	2.6392528093451947e-05	0.00038269165735505326	748.14	PGAM1;MIF;ALDOA
GO_Cellular_Component_2021	ficolin-1-rich granule (GO:0101002)	Tot Core Proteins	8.765897158789834e-05	0.0008473700586830173	438.18	PGAM1;MIF;ALDOA
GO_Cellular_Component_2021	cortical cytoskeleton (GO:0030863)	Tot Core Proteins	0.00036641752551901487	0.0020868930282679	704.07	LASP1;EZR
GO_Cellular_Component_2021	actin cytoskeleton (GO:0015629)	Tot Core Proteins	0.000431770971365775	0.0020868930282679	208.74	LASP1;EZR;ALDOA
GO_Cellular_Component_2021	secretory granule lumen (GO:0034774)	Tot Core Proteins	0.000431770971365775	0.0020868930282679	208.74	PGAM1;MIF;ALDOA
GO_Cellular_Component_2021	vesicle (GO:0031982)	Tot Core Proteins	0.0053889017595054	0.0198924328002081	115.23	MIF;EZR
GO_Cellular_Component_2021	cell cortex region (GO:0099738)	Tot Core Proteins	0.0054875676690229	0.0198924328002081	1155.57	ENO1
GO_Cellular_Component_2021	intracellular organelle lumen (GO:0070013)	Tot Core Proteins	0.0072868782926168	0.0234799411650986	47.79	PGAM1;MIF;ALDOA
GO_Cellular_Component_2021	focal adhesion (GO:0005925)	Tot Core Proteins	0.0151649219376831	0.0413641562161197	53.33	LASP1;EZR
GO_Cellular_Component_2021	cell-substrate junction (GO:0030055)	Tot Core Proteins	0.0156898523578385	0.0413641562161197	51.93	LASP1;EZR
KEGG_2021_Human	Glycolysis / Gluconeogenesis	Tot Core Proteins	9.011382242396956e-11	1.7121626260554215e-09	7434.41	TPI1;PGAM1;ENO1;ENO2;ALDOA
KEGG_2021_Human	HIF-1 signaling pathway	Tot Core Proteins	1.8376535339644008e-05	0.00017457708572661808	876.65	ENO1;ENO2;ALDOA
KEGG_2021_Human	Fructose and mannose metabolism	Tot Core Proteins	0.00011782293987729036	0.0007462119525561722	1456.09	TPI1;ALDOA
KEGG_2021_Human	RNA degradation	Tot Core Proteins	0.0006791469109190254	0.0032259478268653	471.62	ENO1;ENO2
KEGG_2021_Human	Phenylalanine metabolism	Tot Core Proteins	0.0084693662805775	0.0321835918661948	661.82	MIF
KEGG_2021_Human	Pentose phosphate pathway	Tot Core Proteins	0.0149023554252653	0.0470849134566299	321.69	ALDOA
KEGG_2021_Human	Tyrosine metabolism	Tot Core Proteins	0.0178587410119325	0.0470849134566299	255.0	MIF
KEGG_2021_Human	Glycine, serine and threonine metabolism	Tot Core Proteins	0.019825226718581	0.0470849134566299	222.86	PGAM1
GO_Biological_Process_2021	visual system development (GO:0150063)	Up-regulated Proteins	0.0001825931686229406	0.0203972422538918	1100.92	SALL2;SMOC1
GO_Biological_Process_2021	sensory organ development (GO:0007423)	Up-regulated Proteins	0.00034155103523569007	0.0203972422538918	736.71	SALL2;SMOC1
GO_Biological_Process_2021	eye development (GO:0001654)	Up-regulated Proteins	0.00036641752551901487	0.0203972422538918	704.07	SALL2;SMOC1
GO_Molecular_Function_2021	G-quadruplex RNA binding (GO:0002151)	Up-regulated Proteins	0.0029965781728721	0.0301816221796262	2580.41	LIN28A
GO_Molecular_Function_2021	carbon-nitrogen ligase activity, with glutamine as amido-N-donor (GO:0016884)	Up-regulated Proteins	0.0039936462613403	0.0301816221796262	1751.86	ASNS
GO_Molecular_Function_2021	sequence-specific mRNA binding (GO:1990825)	Up-regulated Proteins	0.0049898178893478	0.0301816221796262	1307.49	LIN28A
GO_Molecular_Function_2021	transferrin receptor binding (GO:1990459)	Up-regulated Proteins	0.0054875676690229	0.0301816221796262	1155.57	TF
GO_Biological_Process_2021	regulation of mitotic centrosome separation (GO:0046602)	Up-regulated Core Proteins	0.0004499872571388355	0.0049498598285271	154056.47	KIF11
GO_Biological_Process_2021	mitotic spindle assembly (GO:0090307)	Up-regulated Core Proteins	0.0021999607179423	0.0064776929649087	122117.07	KIF11
GO_Biological_Process_2021	mitotic nuclear division (GO:0140014)	Up-regulated Core Proteins	0.0036999446830449	0.0064776929649087	111574.39	KIF11
GO_Biological_Process_2021	spindle assembly (GO:0051225)	Up-regulated Core Proteins	0.0041999400184506	0.0064776929649087	108994.0	KIF11
GO_Biological_Process_2021	retrograde vesicle-mediated transport, Golgi to endoplasmic reticulum (GO:0006890)	Up-regulated Core Proteins	0.004249939567045	0.0064776929649087	108752.84	KIF11
GO_Biological_Process_2021	antigen processing and presentation of exogenous peptide antigen via MHC class II (GO:0019886)	Up-regulated Core Proteins	0.0048999339081079	0.0064776929649087	105849.45	KIF11
GO_Biological_Process_2021	antigen processing and presentation of peptide antigen via MHC class II (GO:0002495)	Up-regulated Core Proteins	0.0049999330710556	0.0064776929649087	105436.78	KIF11
GO_Biological_Process_2021	antigen processing and presentation of exogenous peptide antigen (GO:0002478)	Up-regulated Core Proteins	0.0051499318302617	0.0064776929649087	104832.75	KIF11
GO_Biological_Process_2021	regulation of cell cycle process (GO:0010564)	Up-regulated Core Proteins	0.0052999306076525	0.0064776929649087	104245.78	KIF11
GO_Biological_Process_2021	microtubule cytoskeleton organization involved in mitosis (GO:1902850)	Up-regulated Core Proteins	0.0063999221281459	0.0070399143409605	100382.8	KIF11
GO_Biological_Process_2021	mitotic spindle organization (GO:0007052)	Up-regulated Core Proteins	0.0078499120514783	0.0078499120514783	96184.04	KIF11
GO_Molecular_Function_2021	microtubule motor activity (GO:0003777)	Up-regulated Core Proteins	0.0027999538675741	0.006599897253216	117233.87	KIF11
GO_Molecular_Function_2021	motor activity (GO:0003774)	Up-regulated Core Proteins	0.003299948626608	0.006599897253216	113899.85	KIF11
GO_Molecular_Function_2021	kinase binding (GO:0019900)	Up-regulated Core Proteins	0.0230498437780612	0.0252998368967869	73663.91	KIF11
GO_Molecular_Function_2021	protein kinase binding (GO:0019901)	Up-regulated Core Proteins	0.0252998368967869	0.0252998368967869	71678.61	KIF11
GO_Cellular_Component_2021	spindle microtubule (GO:0005876)	Up-regulated Core Proteins	0.0030499512001654	0.0215997776800011	115499.24	KIF11
GO_Cellular_Component_2021	mitotic spindle (GO:0072686)	Up-regulated Core Proteins	0.0059999251180858	0.0215997776800011	101706.24	KIF11
GO_Cellular_Component_2021	microtubule (GO:0005874)	Up-regulated Core Proteins	0.0090999041675125	0.0215997776800011	93134.52	KIF11
GO_Cellular_Component_2021	spindle (GO:0005819)	Up-regulated Core Proteins	0.0095999011911116	0.0215997776800011	92028.02	KIF11
GO_Cellular_Component_2021	polymeric cytoskeletal fiber (GO:0099513)	Up-regulated Core Proteins	0.012799884064457	0.0230397913160227	86050.65	KIF11
GO_Cellular_Component_2021	microtubule cytoskeleton (GO:0015630)	Up-regulated Core Proteins	0.0165498672541744	0.0248248008812616	80669.99	KIF11
GO_Biological_Process_2021	glucose catabolic process to pyruvate (GO:0061718)	Down-regulated Proteins	1.538589484472505e-10	2.3551288568153192e-08	5158.33	TPI1;PGAM1;ENO1;ENO2;ALDOA
GO_Biological_Process_2021	canonical glycolysis (GO:0061621)	Down-regulated Proteins	1.538589484472505e-10	2.3551288568153192e-08	5158.33	TPI1;PGAM1;ENO1;ENO2;ALDOA
GO_Biological_Process_2021	glycolytic process through glucose-6-phosphate (GO:0061620)	Down-regulated Proteins	1.9214018699112128e-10	2.3551288568153192e-08	4851.98	TPI1;PGAM1;ENO1;ENO2;ALDOA
GO_Biological_Process_2021	glucose metabolic process (GO:0006006)	Down-regulated Proteins	2.4725762276276316e-10	2.3551288568153192e-08	2145.55	TPI1;PGAM1;GAA;ENO1;ALDOA;ENO2
GO_Biological_Process_2021	glycolytic process (GO:0006096)	Down-regulated Proteins	4.278297573239623e-10	3.2600627508085936e-08	3897.86	TPI1;PGAM1;ENO1;ALDOA;ENO2
GO_Biological_Process_2021	gluconeogenesis (GO:0006094)	Down-regulated Proteins	2.668989708193707e-09	1.452692969745432e-07	2376.62	TPI1;PGAM1;ENO1;ALDOA;ENO2
GO_Biological_Process_2021	carbohydrate catabolic process (GO:0016052)	Down-regulated Proteins	2.668989708193707e-09	1.452692969745432e-07	2376.62	TPI1;PGAM1;ENO1;ALDOA;ENO2
GO_Biological_Process_2021	hexose biosynthetic process (GO:0019319)	Down-regulated Proteins	3.856738038670546e-09	1.8367714909168477e-07	2152.57	TPI1;PGAM1;ENO1;ALDOA;ENO2
GO_Biological_Process_2021	pyruvate metabolic process (GO:0006090)	Down-regulated Proteins	1.2224638292180734e-08	5.175096877023178e-07	1578.15	TPI1;PGAM1;ENO1;ALDOA;ENO2
GO_Biological_Process_2021	neutrophil degranulation (GO:0043312)	Down-regulated Proteins	4.505146896457875e-05	0.0015502335458385	112.03	PGAM1;GAA;COTL1;MIF;ALDOA;CTSB
GO_Biological_Process_2021	neutrophil activation involved in immune response (GO:0002283)	Down-regulated Proteins	4.717854242022344e-05	0.0015502335458385	110.56	PGAM1;GAA;COTL1;MIF;ALDOA;CTSB
GO_Biological_Process_2021	neutrophil mediated immunity (GO:0002446)	Down-regulated Proteins	4.882625341223808e-05	0.0015502335458385	109.48	PGAM1;GAA;COTL1;MIF;ALDOA;CTSB
GO_Biological_Process_2021	synaptic membrane adhesion (GO:0099560)	Down-regulated Proteins	0.00017021266102889025	0.0049885402963082	1110.4	GPC4;PTPRF
GO_Biological_Process_2021	Wnt signaling pathway (GO:0016055)	Down-regulated Proteins	0.0002838929652472258	0.0077259442685137	218.94	WNT8B;GPC4;WLS
GO_Biological_Process_2021	regulation of vacuole organization (GO:0044088)	Down-regulated Proteins	0.00042909766583667375	0.0108990807122515	595.02	ENO1;ENO2
GO_Biological_Process_2021	microtubule polymerization or depolymerization (GO:0031109)	Down-regulated Proteins	0.000649191109030096	0.0154588632837791	450.48	TPPP3;STMN1
GO_Biological_Process_2021	lytic vacuole organization (GO:0080171)	Down-regulated Proteins	0.000971505882662878	0.0217731612526209	343.24	GAA;TPP1
GO_Biological_Process_2021	regulation of protein polymerization (GO:0032271)	Down-regulated Proteins	0.0010928921891777	0.02313288467093	316.93	TPPP3;COTL1
GO_Biological_Process_2021	lysosome organization (GO:0007040)	Down-regulated Proteins	0.0012879206518041	0.0248209499949678	283.48	GAA;TPP1
GO_Biological_Process_2021	nucleocytoplasmic transport (GO:0006913)	Down-regulated Proteins	0.0014265186232744	0.0248209499949678	264.41	SNRPD1;NUTF2
GO_Biological_Process_2021	regulation of filopodium assembly (GO:0051489)	Down-regulated Proteins	0.0014983775587513	0.0248209499949678	255.68	GAP43;RALA
GO_Biological_Process_2021	cortical cytoskeleton organization (GO:0030865)	Down-regulated Proteins	0.0014983775587513	0.0248209499949678	255.68	EZR;LLGL1
GO_Biological_Process_2021	hexose metabolic process (GO:0019318)	Down-regulated Proteins	0.0014983775587513	0.0248209499949678	255.68	GAA;ALDOA
GO_Biological_Process_2021	substantia nigra development (GO:0021762)	Down-regulated Proteins	0.0016471925007538	0.0261491809494678	239.65	CKB;NDRG2
GO_Biological_Process_2021	interleukin-12-mediated signaling pathway (GO:0035722)	Down-regulated Proteins	0.0018830893634099	0.0286982818983683	218.61	RALA;MIF
GO_Biological_Process_2021	cellular response to interleukin-12 (GO:0071349)	Down-regulated Proteins	0.0020487507071338	0.030022077669923	206.27	RALA;MIF
GO_Biological_Process_2021	striated muscle contraction (GO:0006941)	Down-regulated Proteins	0.0025856429296413	0.0364862946738273	175.56	GAA;ALDOA
GO_Biological_Process_2021	regulation of secretion by cell (GO:1903530)	Down-regulated Proteins	0.003078248660908	0.0418861692787845	155.43	RALA;LLGL1
GO_Biological_Process_2021	actin cytoskeleton reorganization (GO:0031532)	Down-regulated Proteins	0.0035015167897823	0.0460026861002435	141.98	RALA;EZR
GO_Molecular_Function_2021	tubulin binding (GO:0015631)	Down-regulated Proteins	6.0663343720918256e-05	0.003639800623255	137.49	TPPP3;STMN1;NEFM;ALDOA;EZR
GO_Molecular_Function_2021	cadherin binding (GO:0045296)	Down-regulated Proteins	0.0009950606222770605	0.0298518186683118	71.21	LASP1;ENO1;ALDOA;EZR
GO_Molecular_Function_2021	actin binding (GO:0003779)	Down-regulated Proteins	0.0018971097455346	0.0333334846000174	85.57	COTL1;ALDOA;EZR
GO_Molecular_Function_2021	hydro-lyase activity (GO:0016836)	Down-regulated Proteins	0.0026808978945138	0.0333334846000174	171.19	ENO1;ENO2
GO_Molecular_Function_2021	myosin binding (GO:0017022)	Down-regulated Proteins	0.0027777903833347	0.0333334846000174	167.01	RALA;LLGL1
GO_Molecular_Function_2021	ATPase binding (GO:0051117)	Down-regulated Proteins	0.0046712365172169	0.0334864202447445	115.7	RALA;EZR
GO_Molecular_Function_2021	ubiquitin protein ligase binding (GO:0031625)	Down-regulated Proteins	0.0058982158541834	0.0334864202447445	46.34	RALA;TPI1;CKB
GO_Molecular_Function_2021	phosphotransferase activity, nitrogenous group as acceptor (GO:0016775)	Down-regulated Proteins	0.0069810406342333	0.0334864202447445	917.89	CKB
GO_Molecular_Function_2021	creatine kinase activity (GO:0004111)	Down-regulated Proteins	0.0069810406342333	0.0334864202447445	917.89	CKB
GO_Molecular_Function_2021	alpha-1,4-glucosidase activity (GO:0004558)	Down-regulated Proteins	0.0069810406342333	0.0334864202447445	917.89	GAA
GO_Molecular_Function_2021	ubiquitin-like protein ligase binding (GO:0044389)	Down-regulated Proteins	0.0070008542310454	0.0334864202447445	42.03	RALA;TPI1;CKB
GO_Molecular_Function_2021	coreceptor activity involved in Wnt signaling pathway, planar cell polarity pathway (GO:1904929)	Down-regulated Proteins	0.0083716050611861	0.0334864202447445	707.41	GPC4
GO_Molecular_Function_2021	fructose binding (GO:0070061)	Down-regulated Proteins	0.0083716050611861	0.0334864202447445	707.41	ALDOA
GO_Molecular_Function_2021	alpha-glucosidase activity (GO:0090599)	Down-regulated Proteins	0.0083716050611861	0.0334864202447445	707.41	GAA
GO_Molecular_Function_2021	sulfatide binding (GO:0120146)	Down-regulated Proteins	0.0083716050611861	0.0334864202447445	707.41	TPP1
GO_Molecular_Function_2021	serine-type exopeptidase activity (GO:0070008)	Down-regulated Proteins	0.009760292455613	0.0352013845686823	570.56	TPP1
GO_Molecular_Function_2021	coreceptor activity involved in Wnt signaling pathway (GO:0071936)	Down-regulated Proteins	0.011147105113416	0.0352013845686823	475.0	GPC4
GO_Molecular_Function_2021	intramolecular oxidoreductase activity, interconverting aldoses and ketoses (GO:0016861)	Down-regulated Proteins	0.011147105113416	0.0352013845686823	475.0	TPI1
GO_Molecular_Function_2021	aldehyde-lyase activity (GO:0016832)	Down-regulated Proteins	0.011147105113416	0.0352013845686823	475.0	ALDOA
GO_Molecular_Function_2021	intramolecular transferase activity, phosphotransferases (GO:0016868)	Down-regulated Proteins	0.0125320453634479	0.0375961360903438	404.78	PGAM1
GO_Molecular_Function_2021	myosin II binding (GO:0045159)	Down-regulated Proteins	0.0152963180805092	0.0437037659443121	309.05	LLGL1
GO_Molecular_Function_2021	protein kinase A catalytic subunit binding (GO:0034236)	Down-regulated Proteins	0.0180531296002428	0.0470951206962856	247.31	EZR
GO_Molecular_Function_2021	intramolecular oxidoreductase activity, transposing C=C bonds (GO:0016863)	Down-regulated Proteins	0.0180531296002428	0.0470951206962856	247.31	MIF
GO_Cellular_Component_2021	ficolin-1-rich granule (GO:0101002)	Down-regulated Proteins	1.7790317246506565e-07	1.4943866487065517e-05	471.36	PGAM1;GAA;COTL1;MIF;ALDOA;CTSB
GO_Cellular_Component_2021	ficolin-1-rich granule lumen (GO:1904813)	Down-regulated Proteins	7.113408629447951e-07	2.9876316243681395e-05	517.79	PGAM1;COTL1;MIF;ALDOA;CTSB
GO_Cellular_Component_2021	cortical cytoskeleton (GO:0030863)	Down-regulated Proteins	1.2374254621998772e-06	3.464791294159656e-05	836.22	LASP1;COTL1;EZR;LLGL1
GO_Cellular_Component_2021	lysosomal lumen (GO:0043202)	Down-regulated Proteins	6.029285201855702e-06	0.00012661498923896976	485.89	GAA;TPP1;GPC4;CTSB
GO_Cellular_Component_2021	cytoplasmic vesicle lumen (GO:0060205)	Down-regulated Proteins	1.908954081412808e-05	0.00032070428567735167	324.05	PGAM1;COTL1;MIF;ALDOA
GO_Cellular_Component_2021	cortical actin cytoskeleton (GO:0030864)	Down-regulated Proteins	2.7196132100505463e-05	0.0003807458494070765	644.75	LASP1;COTL1;LLGL1
GO_Cellular_Component_2021	actin cytoskeleton (GO:0015629)	Down-regulated Proteins	6.955244573142707e-05	0.0008346293487771248	131.57	LASP1;COTL1;ALDOA;EZR;LLGL1
GO_Cellular_Component_2021	secretory granule lumen (GO:0034774)	Down-regulated Proteins	0.0009279449394929646	0.0090061148012916	73.33	PGAM1;COTL1;MIF;ALDOA
GO_Cellular_Component_2021	intracellular organelle lumen (GO:0070013)	Down-regulated Proteins	0.0009649408715669588	0.0090061148012916	43.02	PGAM1;COTL1;MIF;GPC4;ALDOA;CTSB
GO_Cellular_Component_2021	vacuolar lumen (GO:0005775)	Down-regulated Proteins	0.0014467811501869	0.0121529616615706	98.39	GAA;TPP1;GPC4
GO_Cellular_Component_2021	filopodium (GO:0030175)	Down-regulated Proteins	0.0029764701916058	0.0227294087358988	159.14	GAP43;EZR
GO_Cellular_Component_2021	lytic vacuole (GO:0000323)	Down-regulated Proteins	0.0034665845929012	0.0242660921503089	62.17	GAA;TPP1;CTSB
GO_Cellular_Component_2021	lysosome (GO:0005764)	Down-regulated Proteins	0.0041544337612915	0.0268440335344991	37.68	GAA;TPP1;GPC4;CTSB
GO_Cellular_Component_2021	actin filament (GO:0005884)	Down-regulated Proteins	0.0045471782054532	0.0272830692327195	117.95	COTL1;EZR
GO_Cellular_Component_2021	polymeric cytoskeletal fiber (GO:0099513)	Down-regulated Proteins	0.0053600812884579	0.0300164552153647	48.9	TPPP3;COTL1;EZR
GO_Cellular_Component_2021	endolysosome lumen (GO:0036021)	Down-regulated Proteins	0.0069810406342333	0.034494553722094	917.89	CTSB
GO_Cellular_Component_2021	neurofibrillary tangle (GO:0097418)	Down-regulated Proteins	0.0069810406342333	0.034494553722094	917.89	NEFM
GO_Cellular_Component_2021	early endosome membrane (GO:0031901)	Down-regulated Proteins	0.0081065569634429	0.0378305991627339	77.5	LLGL1;WLS
GO_Cellular_Component_2021	cytoskeleton (GO:0005856)	Down-regulated Proteins	0.0092664546795388	0.0409674838463824	25.37	NEFM;ALDOA;EZR;LLGL1
KEGG_2021_Human	Glycolysis / Gluconeogenesis	Down-regulated Proteins	3.3549641688862753e-08	1.8452302928874511e-06	1201.46	TPI1;PGAM1;ENO1;ALDOA;ENO2
KEGG_2021_Human	HIF-1 signaling pathway	Down-regulated Proteins	0.0004670986010476483	0.0128452115288103	172.47	ENO1;ALDOA;ENO2
KEGG_2021_Human	Lysosome	Down-regulated Proteins	0.0007461751110105926	0.0133582058866145	137.19	GAA;TPP1;CTSB
KEGG_2021_Human	Fructose and mannose metabolism	Down-regulated Proteins	0.000971505882662878	0.0133582058866145	343.24	TPI1;ALDOA
GO_Biological_Process_2021	glucose catabolic process to pyruvate (GO:0061718)	Down-regulated Core Proteins	4.001194529809648e-13	3.567009342729415e-11	30005.92	TPI1;PGAM1;ENO1;ENO2;ALDOA
GO_Biological_Process_2021	canonical glycolysis (GO:0061621)	Down-regulated Core Proteins	4.001194529809648e-13	3.567009342729415e-11	30005.92	TPI1;PGAM1;ENO1;ENO2;ALDOA
GO_Biological_Process_2021	glycolytic process through glucose-6-phosphate (GO:0061620)	Down-regulated Core Proteins	5.000480387003853e-13	3.567009342729415e-11	28281.59	TPI1;PGAM1;ENO1;ENO2;ALDOA
GO_Biological_Process_2021	glycolytic process (GO:0006096)	Down-regulated Core Proteins	1.1167880763243245e-12	5.974816208335136e-11	22894.82	TPI1;PGAM1;ENO1;ENO2;ALDOA
GO_Biological_Process_2021	gluconeogenesis (GO:0006094)	Down-regulated Core Proteins	7.030145691953439e-12	2.5074186301300597e-10	14234.3	TPI1;PGAM1;ENO1;ENO2;ALDOA
GO_Biological_Process_2021	carbohydrate catabolic process (GO:0016052)	Down-regulated Core Proteins	7.030145691953439e-12	2.5074186301300597e-10	14234.3	TPI1;PGAM1;ENO1;ENO2;ALDOA
GO_Biological_Process_2021	hexose biosynthetic process (GO:0019319)	Down-regulated Core Proteins	1.018161854388298e-11	3.112666240558511e-10	12947.91	TPI1;PGAM1;ENO1;ENO2;ALDOA
GO_Biological_Process_2021	pyruvate metabolic process (GO:0006090)	Down-regulated Core Proteins	3.254041105808324e-11	8.704559958037265e-10	9630.44	TPI1;PGAM1;ENO1;ENO2;ALDOA
GO_Biological_Process_2021	glucose metabolic process (GO:0006006)	Down-regulated Core Proteins	6.0442339045984e-11	1.4371845062045087e-09	8228.25	TPI1;PGAM1;ENO1;ENO2;ALDOA
GO_Biological_Process_2021	regulation of vacuole organization (GO:0044088)	Down-regulated Core Proteins	5.1698634856081705e-05	0.0011063507859201	2463.82	ENO1;ENO2
GO_Biological_Process_2021	neutrophil degranulation (GO:0043312)	Down-regulated Core Proteins	0.0014624145381141	0.0240750999199271	114.2	PGAM1;MIF;ALDOA
GO_Biological_Process_2021	neutrophil activation involved in immune response (GO:0002283)	Down-regulated Core Proteins	0.0014976901417846	0.0240750999199271	112.81	PGAM1;MIF;ALDOA
GO_Biological_Process_2021	neutrophil mediated immunity (GO:0002446)	Down-regulated Core Proteins	0.0015244987392993	0.0240750999199271	111.79	PGAM1;MIF;ALDOA
GO_Biological_Process_2021	protein homooligomerization (GO:0051260)	Down-regulated Core Proteins	0.0015825006890192	0.0240750999199271	269.21	MIF;ALDOA
GO_Biological_Process_2021	regulation of phosphorylation (GO:0042325)	Down-regulated Core Proteins	0.0016875070037332	0.0240750999199271	257.81	PGAM1;MIF
GO_Biological_Process_2021	negative regulation of macrophage chemotaxis (GO:0010760)	Down-regulated Core Proteins	0.0024977078641967	0.0252961747107188	3326.77	MIF
GO_Biological_Process_2021	positive regulation of plasminogen activation (GO:0010756)	Down-regulated Core Proteins	0.0029965781728721	0.0252961747107188	2580.41	ENO1
GO_Biological_Process_2021	negative regulation of cellular response to hypoxia (GO:1900038)	Down-regulated Core Proteins	0.0029965781728721	0.0252961747107188	2580.41	ENO1
GO_Biological_Process_2021	protein localization to nuclear envelope (GO:0090435)	Down-regulated Core Proteins	0.0029965781728721	0.0252961747107188	2580.41	NUTF2
GO_Biological_Process_2021	establishment of centrosome localization (GO:0051660)	Down-regulated Core Proteins	0.0034952242970889	0.0252961747107188	2093.27	EZR
GO_Biological_Process_2021	sphingosine-1-phosphate receptor signaling pathway (GO:0003376)	Down-regulated Core Proteins	0.0034952242970889	0.0252961747107188	2093.27	EZR
GO_Biological_Process_2021	aldehyde biosynthetic process (GO:0046184)	Down-regulated Core Proteins	0.0034952242970889	0.0252961747107188	2093.27	TPI1
GO_Biological_Process_2021	gland morphogenesis (GO:0022612)	Down-regulated Core Proteins	0.0034952242970889	0.0252961747107188	2093.27	EZR
GO_Biological_Process_2021	creatine metabolic process (GO:0006600)	Down-regulated Core Proteins	0.0034952242970889	0.0252961747107188	2093.27	CKB
GO_Biological_Process_2021	glyceraldehyde-3-phosphate metabolic process (GO:0019682)	Down-regulated Core Proteins	0.0034952242970889	0.0252961747107188	2093.27	TPI1
GO_Biological_Process_2021	negative regulation of p38MAPK cascade (GO:1903753)	Down-regulated Core Proteins	0.0034952242970889	0.0252961747107188	2093.27	EZR
GO_Biological_Process_2021	positive regulation of protein localization to early endosome (GO:1902966)	Down-regulated Core Proteins	0.0039936462613403	0.0252961747107188	1751.86	EZR
GO_Biological_Process_2021	positive regulation of protein localization to endosome (GO:1905668)	Down-regulated Core Proteins	0.0039936462613403	0.0252961747107188	1751.86	EZR
GO_Biological_Process_2021	fructose metabolic process (GO:0006000)	Down-regulated Core Proteins	0.0039936462613403	0.0252961747107188	1751.86	ALDOA
GO_Biological_Process_2021	positive regulation of early endosome to late endosome transport (GO:2000643)	Down-regulated Core Proteins	0.0039936462613403	0.0252961747107188	1751.86	EZR
GO_Biological_Process_2021	negative regulation of macrophage migration (GO:1905522)	Down-regulated Core Proteins	0.0039936462613403	0.0252961747107188	1751.86	MIF
GO_Biological_Process_2021	regulation of protein localization to early endosome (GO:1902965)	Down-regulated Core Proteins	0.0039936462613403	0.0252961747107188	1751.86	EZR
GO_Biological_Process_2021	positive regulation of muscle contraction (GO:0045933)	Down-regulated Core Proteins	0.0039936462613403	0.0252961747107188	1751.86	ENO1
GO_Biological_Process_2021	ketone biosynthetic process (GO:0042181)	Down-regulated Core Proteins	0.0044918441075108	0.0252961747107188	1500.17	TPI1
GO_Biological_Process_2021	positive regulation of ATP biosynthetic process (GO:2001171)	Down-regulated Core Proteins	0.0044918441075108	0.0252961747107188	1500.17	ENO1
GO_Biological_Process_2021	positive regulation of protein kinase A signaling (GO:0010739)	Down-regulated Core Proteins	0.0044918441075108	0.0252961747107188	1500.17	MIF
GO_Biological_Process_2021	fructose 1,6-bisphosphate metabolic process (GO:0030388)	Down-regulated Core Proteins	0.0044918441075108	0.0252961747107188	1500.17	ALDOA
GO_Biological_Process_2021	astral microtubule organization (GO:0030953)	Down-regulated Core Proteins	0.0044918441075108	0.0252961747107188	1500.17	EZR
GO_Biological_Process_2021	modulation by symbiont of host process (GO:0044003)	Down-regulated Core Proteins	0.0049898178893478	0.027082749608343	1307.49	ENO1
GO_Biological_Process_2021	establishment of epithelial cell apical/basal polarity (GO:0045198)	Down-regulated Core Proteins	0.0054875676690229	0.027082749608343	1155.57	EZR
GO_Biological_Process_2021	positive regulation of cytoplasmic transport (GO:1903651)	Down-regulated Core Proteins	0.0054875676690229	0.027082749608343	1155.57	EZR
GO_Biological_Process_2021	glycerol metabolic process (GO:0006071)	Down-regulated Core Proteins	0.0054875676690229	0.027082749608343	1155.57	TPI1
GO_Biological_Process_2021	regulation of ERK1 and ERK2 cascade (GO:0070372)	Down-regulated Core Proteins	0.0059585913720441	0.027082749608343	107.2	MIF;EZR
GO_Biological_Process_2021	negative regulation of leukocyte chemotaxis (GO:0002689)	Down-regulated Core Proteins	0.0059850935124877	0.027082749608343	1032.95	MIF
GO_Biological_Process_2021	regulation of plasminogen activation (GO:0010755)	Down-regulated Core Proteins	0.0059850935124877	0.027082749608343	1032.95	ENO1
GO_Biological_Process_2021	positive regulation of purine nucleotide biosynthetic process (GO:1900373)	Down-regulated Core Proteins	0.006482395492037	0.027082749608343	932.06	ENO1
GO_Biological_Process_2021	negative regulation of intrinsic apoptotic signaling pathway in response to DNA damage by p53 class mediator (GO:1902166)	Down-regulated Core Proteins	0.006482395492037	0.027082749608343	932.06	MIF
GO_Biological_Process_2021	regulation of cell aging (GO:0090342)	Down-regulated Core Proteins	0.006482395492037	0.027082749608343	932.06	MIF
GO_Biological_Process_2021	negative regulation of DNA damage response, signal transduction by p53 class mediator (GO:0043518)	Down-regulated Core Proteins	0.0069794736802133	0.027082749608343	847.7	MIF
GO_Biological_Process_2021	regulation of intrinsic apoptotic signaling pathway in response to DNA damage by p53 class mediator (GO:1902165)	Down-regulated Core Proteins	0.0069794736802133	0.027082749608343	847.7	MIF
GO_Biological_Process_2021	microvillus organization (GO:0032528)	Down-regulated Core Proteins	0.0069794736802133	0.027082749608343	847.7	EZR
GO_Biological_Process_2021	polarized epithelial cell differentiation (GO:0030859)	Down-regulated Core Proteins	0.0069794736802133	0.027082749608343	847.7	EZR
GO_Biological_Process_2021	establishment of apical/basal cell polarity (GO:0035089)	Down-regulated Core Proteins	0.0074763281564485	0.027082749608343	776.21	EZR
GO_Biological_Process_2021	protein trimerization (GO:0070206)	Down-regulated Core Proteins	0.0074763281564485	0.027082749608343	776.21	MIF
GO_Biological_Process_2021	microvillus assembly (GO:0030033)	Down-regulated Core Proteins	0.0074763281564485	0.027082749608343	776.21	EZR
GO_Biological_Process_2021	prostanoid biosynthetic process (GO:0046457)	Down-regulated Core Proteins	0.0074763281564485	0.027082749608343	776.21	MIF
GO_Biological_Process_2021	protein homotrimerization (GO:0070207)	Down-regulated Core Proteins	0.0074763281564485	0.027082749608343	776.21	MIF
GO_Biological_Process_2021	protein kinase A signaling (GO:0010737)	Down-regulated Core Proteins	0.0074763281564485	0.027082749608343	776.21	EZR
GO_Biological_Process_2021	filopodium assembly (GO:0046847)	Down-regulated Core Proteins	0.0079729589968486	0.027082749608343	714.91	EZR
GO_Biological_Process_2021	regulation of leukocyte activation (GO:0002694)	Down-regulated Core Proteins	0.0079729589968486	0.027082749608343	714.91	MIF
GO_Biological_Process_2021	regulation of ATP biosynthetic process (GO:2001169)	Down-regulated Core Proteins	0.0079729589968486	0.027082749608343	714.91	ENO1
GO_Biological_Process_2021	nuclear transport (GO:0051169)	Down-regulated Core Proteins	0.0079729589968486	0.027082749608343	714.91	NUTF2
GO_Biological_Process_2021	regulation of phosphate metabolic process (GO:0019220)	Down-regulated Core Proteins	0.0079729589968486	0.027082749608343	714.91	PGAM1
GO_Biological_Process_2021	negative regulation of cell aging (GO:0090344)	Down-regulated Core Proteins	0.0084693662805775	0.0278837597545169	661.82	MIF
GO_Biological_Process_2021	negative regulation of intrinsic apoptotic signaling pathway by p53 class mediator (GO:1902254)	Down-regulated Core Proteins	0.0084693662805775	0.0278837597545169	661.82	MIF
GO_Biological_Process_2021	negative regulation of signal transduction by p53 class mediator (GO:1901797)	Down-regulated Core Proteins	0.0089655500933473	0.0282151135290637	615.43	MIF
GO_Biological_Process_2021	regulation of cellular protein catabolic process (GO:1903362)	Down-regulated Core Proteins	0.0089655500933473	0.0282151135290637	615.43	EZR
GO_Biological_Process_2021	regulation of early endosome to late endosome transport (GO:2000641)	Down-regulated Core Proteins	0.0089655500933473	0.0282151135290637	615.43	EZR
GO_Biological_Process_2021	negative regulation of T cell receptor signaling pathway (GO:0050860)	Down-regulated Core Proteins	0.0094615105123957	0.0285177922486294	574.57	EZR
GO_Biological_Process_2021	positive regulation of cellular protein catabolic process (GO:1903364)	Down-regulated Core Proteins	0.0094615105123957	0.0285177922486294	574.57	EZR
GO_Biological_Process_2021	prostaglandin biosynthetic process (GO:0001516)	Down-regulated Core Proteins	0.0094615105123957	0.0285177922486294	574.57	MIF
GO_Biological_Process_2021	establishment of epithelial cell polarity (GO:0090162)	Down-regulated Core Proteins	0.0099572476243861	0.0287952836705222	538.34	EZR
GO_Biological_Process_2021	positive regulation of protein processing (GO:0010954)	Down-regulated Core Proteins	0.0099572476243861	0.0287952836705222	538.34	ENO1
GO_Biological_Process_2021	regulation of protein kinase A signaling (GO:0010738)	Down-regulated Core Proteins	0.0099572476243861	0.0287952836705222	538.34	MIF
GO_Biological_Process_2021	regulation of macrophage chemotaxis (GO:0010758)	Down-regulated Core Proteins	0.0109480522580432	0.0308274103055429	476.99	MIF
GO_Biological_Process_2021	negative regulation of interleukin-2 production (GO:0032703)	Down-regulated Core Proteins	0.0109480522580432	0.0308274103055429	476.99	EZR
GO_Biological_Process_2021	regulation of cell size (GO:0008361)	Down-regulated Core Proteins	0.0119379646683197	0.0331782394677978	427.12	EZR
GO_Biological_Process_2021	positive regulation of multicellular organismal process (GO:0051240)	Down-regulated Core Proteins	0.0121840054754284	0.0334279124582268	63.12	MIF;ENO1
GO_Biological_Process_2021	negative regulation of antigen receptor-mediated signaling pathway (GO:0050858)	Down-regulated Core Proteins	0.0124325865055395	0.0336781457238666	405.55	EZR
GO_Biological_Process_2021	negative regulation of intrinsic apoptotic signaling pathway in response to DNA damage (GO:1902230)	Down-regulated Core Proteins	0.0129269855424658	0.0341527766183666	385.85	MIF
GO_Biological_Process_2021	endothelial cell development (GO:0001885)	Down-regulated Core Proteins	0.0129269855424658	0.0341527766183666	385.85	EZR
GO_Biological_Process_2021	protein export from nucleus (GO:0006611)	Down-regulated Core Proteins	0.0134211618656948	0.0342279854082027	367.79	NUTF2
GO_Biological_Process_2021	leukocyte cell-cell adhesion (GO:0007159)	Down-regulated Core Proteins	0.0139151155631478	0.0342279854082027	351.18	EZR
GO_Biological_Process_2021	positive regulation of fibroblast proliferation (GO:0048146)	Down-regulated Core Proteins	0.0139151155631478	0.0342279854082027	351.18	MIF
GO_Biological_Process_2021	regulation of muscle contraction (GO:0006937)	Down-regulated Core Proteins	0.0139151155631478	0.0342279854082027	351.18	ENO1
GO_Biological_Process_2021	carbohydrate derivative biosynthetic process (GO:1901137)	Down-regulated Core Proteins	0.0139151155631478	0.0342279854082027	351.18	TPI1
GO_Biological_Process_2021	regulation of DNA damage response, signal transduction by p53 class mediator (GO:0043516)	Down-regulated Core Proteins	0.0139151155631478	0.0342279854082027	351.18	MIF
GO_Biological_Process_2021	establishment of endothelial barrier (GO:0061028)	Down-regulated Core Proteins	0.0144088467211374	0.0346807088168395	335.86	EZR
GO_Biological_Process_2021	positive regulation of B cell proliferation (GO:0030890)	Down-regulated Core Proteins	0.0149023554252653	0.0346807088168395	321.69	MIF
GO_Biological_Process_2021	positive regulation of phosphate metabolic process (GO:0045937)	Down-regulated Core Proteins	0.0149023554252653	0.0346807088168395	321.69	MIF
GO_Biological_Process_2021	regulation of macrophage activation (GO:0043030)	Down-regulated Core Proteins	0.0149023554252653	0.0346807088168395	321.69	MIF
GO_Biological_Process_2021	negative regulation of response to DNA damage stimulus (GO:2001021)	Down-regulated Core Proteins	0.0153956417644848	0.0346807088168395	308.54	MIF
GO_Biological_Process_2021	regulation of cellular component size (GO:0032535)	Down-regulated Core Proteins	0.0153956417644848	0.0346807088168395	308.54	EZR
GO_Biological_Process_2021	prostaglandin metabolic process (GO:0006693)	Down-regulated Core Proteins	0.0153956417644848	0.0346807088168395	308.54	MIF
GO_Biological_Process_2021	cellular response to cAMP (GO:0071320)	Down-regulated Core Proteins	0.0153956417644848	0.0346807088168395	308.54	EZR
GO_Biological_Process_2021	establishment or maintenance of epithelial cell apical/basal polarity (GO:0045197)	Down-regulated Core Proteins	0.0158887058240637	0.0350534334675221	296.32	EZR
GO_Biological_Process_2021	regulation of cellular amide metabolic process (GO:0034248)	Down-regulated Core Proteins	0.0158887058240637	0.0350534334675221	296.32	PGAM1
GO_Biological_Process_2021	actin filament bundle assembly (GO:0051017)	Down-regulated Core Proteins	0.0163815476907073	0.0350565120581136	284.93	EZR
GO_Biological_Process_2021	actin filament bundle organization (GO:0061572)	Down-regulated Core Proteins	0.0163815476907073	0.0350565120581136	284.93	EZR
GO_Biological_Process_2021	positive regulation of ATP metabolic process (GO:1903580)	Down-regulated Core Proteins	0.0163815476907073	0.0350565120581136	284.93	ENO1
GO_Biological_Process_2021	regulation of T cell receptor signaling pathway (GO:0050856)	Down-regulated Core Proteins	0.0173665651965465	0.0364357348241269	264.33	EZR
GO_Biological_Process_2021	oxoacid metabolic process (GO:0043436)	Down-regulated Core Proteins	0.0173665651965465	0.0364357348241269	264.33	MIF
GO_Biological_Process_2021	negative regulation of stress-activated MAPK cascade (GO:0032873)	Down-regulated Core Proteins	0.0183506949831896	0.0377600839077171	246.23	EZR
GO_Biological_Process_2021	regulation of p38MAPK cascade (GO:1900744)	Down-regulated Core Proteins	0.0183506949831896	0.0377600839077171	246.23	EZR
GO_Biological_Process_2021	response to cAMP (GO:0051591)	Down-regulated Core Proteins	0.0188424272009397	0.0384026611523914	237.98	EZR
GO_Biological_Process_2021	organophosphate biosynthetic process (GO:0090407)	Down-regulated Core Proteins	0.0193339377497966	0.0386678754995933	230.2	TPI1
GO_Biological_Process_2021	regulation of cellular component biogenesis (GO:0044087)	Down-regulated Core Proteins	0.0193339377497966	0.0386678754995933	230.2	EZR
GO_Biological_Process_2021	nucleocytoplasmic transport (GO:0006913)	Down-regulated Core Proteins	0.019825226718581	0.0389229221814343	222.86	NUTF2
GO_Biological_Process_2021	carboxylic acid metabolic process (GO:0019752)	Down-regulated Core Proteins	0.019825226718581	0.0389229221814343	222.86	MIF
GO_Biological_Process_2021	cortical cytoskeleton organization (GO:0030865)	Down-regulated Core Proteins	0.0203162941970357	0.0391683509744652	215.92	EZR
GO_Biological_Process_2021	hexose metabolic process (GO:0019318)	Down-regulated Core Proteins	0.0203162941970357	0.0391683509744652	215.92	ALDOA
GO_Biological_Process_2021	regulation of purine nucleotide metabolic process (GO:1900542)	Down-regulated Core Proteins	0.0212977650246516	0.0399800150462758	203.13	PGAM1
GO_Biological_Process_2021	substantia nigra development (GO:0021762)	Down-regulated Core Proteins	0.0212977650246516	0.0399800150462758	203.13	CKB
GO_Biological_Process_2021	regulation of carbohydrate catabolic process (GO:0043470)	Down-regulated Core Proteins	0.0212977650246516	0.0399800150462758	203.13	PGAM1
GO_Biological_Process_2021	regulation of fibroblast proliferation (GO:0048145)	Down-regulated Core Proteins	0.0227683122669265	0.0416147277466578	186.27	MIF
GO_Biological_Process_2021	regulation of B cell proliferation (GO:0030888)	Down-regulated Core Proteins	0.0227683122669265	0.0416147277466578	186.27	MIF
GO_Biological_Process_2021	interleukin-12-mediated signaling pathway (GO:0035722)	Down-regulated Core Proteins	0.0227683122669265	0.0416147277466578	186.27	MIF
GO_Biological_Process_2021	positive regulation of gene expression (GO:0010628)	Down-regulated Core Proteins	0.0229464386640449	0.0416147277466578	38.36	MIF;EZR
GO_Biological_Process_2021	cellular response to interleukin-12 (GO:0071349)	Down-regulated Core Proteins	0.0237475721230066	0.0423498369526951	176.34	MIF
GO_Biological_Process_2021	regulation of interleukin-2 production (GO:0032663)	Down-regulated Core Proteins	0.0237475721230066	0.0423498369526951	176.34	EZR
GO_Biological_Process_2021	regulation of generation of precursor metabolites and energy (GO:0043467)	Down-regulated Core Proteins	0.024725948817258	0.04337174628601	167.3	PGAM1
GO_Biological_Process_2021	negative regulation of ERK1 and ERK2 cascade (GO:0070373)	Down-regulated Core Proteins	0.024725948817258	0.04337174628601	167.3	EZR
GO_Biological_Process_2021	inositol lipid-mediated signaling (GO:0048017)	Down-regulated Core Proteins	0.0252148061968427	0.043869662814019	163.08	EZR
GO_Biological_Process_2021	protein homotetramerization (GO:0051289)	Down-regulated Core Proteins	0.0257034430516592	0.0443591678472184	159.04	ALDOA
GO_Biological_Process_2021	positive regulation of B cell activation (GO:0050871)	Down-regulated Core Proteins	0.0261918594705427	0.0448404634135692	155.17	MIF
GO_Biological_Process_2021	striated muscle contraction (GO:0006941)	Down-regulated Core Proteins	0.0266800555326239	0.0449569439683584	151.46	ALDOA
GO_Biological_Process_2021	cytoplasmic microtubule organization (GO:0031122)	Down-regulated Core Proteins	0.0266800555326239	0.0449569439683584	151.46	EZR
GO_Biological_Process_2021	regulation of ATP metabolic process (GO:1903578)	Down-regulated Core Proteins	0.0276557869621033	0.0462370188272664	144.5	PGAM1
GO_Molecular_Function_2021	cadherin binding (GO:0045296)	Down-regulated Core Proteins	1.2828665110208657e-05	0.0003976886184164683	464.53	LASP1;ENO1;EZR;ALDOA
GO_Molecular_Function_2021	hydro-lyase activity (GO:0016836)	Down-regulated Core Proteins	0.00032944057318529184	0.005106328884372	754.04	ENO1;ENO2
GO_Molecular_Function_2021	phosphotransferase activity, nitrogenous group as acceptor (GO:0016775)	Down-regulated Core Proteins	0.0024977078641967	0.0139247167332835	3326.77	CKB
GO_Molecular_Function_2021	creatine kinase activity (GO:0004111)	Down-regulated Core Proteins	0.0024977078641967	0.0139247167332835	3326.77	CKB
GO_Molecular_Function_2021	fructose binding (GO:0070061)	Down-regulated Core Proteins	0.0029965781728721	0.0139247167332835	2580.41	ALDOA
GO_Molecular_Function_2021	actin binding (GO:0003779)	Down-regulated Core Proteins	0.0033448331590871	0.0139247167332835	161.36	EZR;ALDOA
GO_Molecular_Function_2021	aldehyde-lyase activity (GO:0016832)	Down-regulated Core Proteins	0.0039936462613403	0.0139247167332835	1751.86	ALDOA
GO_Molecular_Function_2021	intramolecular oxidoreductase activity, interconverting aldoses and ketoses (GO:0016861)	Down-regulated Core Proteins	0.0039936462613403	0.0139247167332835	1751.86	TPI1
GO_Molecular_Function_2021	GTPase binding (GO:0051020)	Down-regulated Core Proteins	0.0042887731676215	0.0139247167332835	135.55	NUTF2;ENO1
GO_Molecular_Function_2021	intramolecular transferase activity, phosphotransferases (GO:0016868)	Down-regulated Core Proteins	0.0044918441075108	0.0139247167332835	1500.17	PGAM1
GO_Molecular_Function_2021	intramolecular oxidoreductase activity, transposing C=C bonds (GO:0016863)	Down-regulated Core Proteins	0.006482395492037	0.016746188354429	932.06	MIF
GO_Molecular_Function_2021	protein kinase A catalytic subunit binding (GO:0034236)	Down-regulated Core Proteins	0.006482395492037	0.016746188354429	932.06	EZR
GO_Molecular_Function_2021	ubiquitin protein ligase binding (GO:0031625)	Down-regulated Core Proteins	0.0073373307967401	0.0174967118999189	92.16	TPI1;CKB
GO_Molecular_Function_2021	ubiquitin-like protein ligase binding (GO:0044389)	Down-regulated Core Proteins	0.0082731867865232	0.0183191993130158	84.38	TPI1;CKB
GO_Molecular_Function_2021	tubulin binding (GO:0015631)	Down-regulated Core Proteins	0.0097426841283031	0.0201348805318265	74.73	EZR;ALDOA
GO_Molecular_Function_2021	protein kinase A regulatory subunit binding (GO:0034237)	Down-regulated Core Proteins	0.0109480522580432	0.0212118512499588	476.99	EZR
GO_Molecular_Function_2021	chemoattractant activity (GO:0042056)	Down-regulated Core Proteins	0.0158887058240637	0.0289735223850574	296.32	MIF
GO_Molecular_Function_2021	protein kinase binding (GO:0019901)	Down-regulated Core Proteins	0.0251293382387718	0.0432783047445515	35.61	PGAM1;EZR
GO_Molecular_Function_2021	RNA binding (GO:0003723)	Down-regulated Core Proteins	0.0286248284251884	0.0467036674305706	20.18	ENO1;EZR;ALDOA
GO_Cellular_Component_2021	cytoplasmic vesicle lumen (GO:0060205)	Down-regulated Core Proteins	2.157871492289579e-05	0.00038269165735505326	817.21	PGAM1;MIF;ALDOA
GO_Cellular_Component_2021	ficolin-1-rich granule lumen (GO:1904813)	Down-regulated Core Proteins	2.6392528093451947e-05	0.00038269165735505326	748.14	PGAM1;MIF;ALDOA
GO_Cellular_Component_2021	ficolin-1-rich granule (GO:0101002)	Down-regulated Core Proteins	8.765897158789834e-05	0.0008473700586830173	438.18	PGAM1;MIF;ALDOA
GO_Cellular_Component_2021	cortical cytoskeleton (GO:0030863)	Down-regulated Core Proteins	0.00036641752551901487	0.0020868930282679	704.07	LASP1;EZR
GO_Cellular_Component_2021	actin cytoskeleton (GO:0015629)	Down-regulated Core Proteins	0.000431770971365775	0.0020868930282679	208.74	LASP1;EZR;ALDOA
GO_Cellular_Component_2021	secretory granule lumen (GO:0034774)	Down-regulated Core Proteins	0.000431770971365775	0.0020868930282679	208.74	PGAM1;MIF;ALDOA
GO_Cellular_Component_2021	vesicle (GO:0031982)	Down-regulated Core Proteins	0.0053889017595054	0.0198924328002081	115.23	MIF;EZR
GO_Cellular_Component_2021	cell cortex region (GO:0099738)	Down-regulated Core Proteins	0.0054875676690229	0.0198924328002081	1155.57	ENO1
GO_Cellular_Component_2021	intracellular organelle lumen (GO:0070013)	Down-regulated Core Proteins	0.0072868782926168	0.0234799411650986	47.79	PGAM1;MIF;ALDOA
GO_Cellular_Component_2021	focal adhesion (GO:0005925)	Down-regulated Core Proteins	0.0151649219376831	0.0413641562161197	53.33	LASP1;EZR
GO_Cellular_Component_2021	cell-substrate junction (GO:0030055)	Down-regulated Core Proteins	0.0156898523578385	0.0413641562161197	51.93	LASP1;EZR
KEGG_2021_Human	Glycolysis / Gluconeogenesis	Down-regulated Core Proteins	9.011382242396956e-11	1.7121626260554215e-09	7434.41	TPI1;PGAM1;ENO1;ENO2;ALDOA
KEGG_2021_Human	HIF-1 signaling pathway	Down-regulated Core Proteins	1.8376535339644008e-05	0.00017457708572661808	876.65	ENO1;ENO2;ALDOA
KEGG_2021_Human	Fructose and mannose metabolism	Down-regulated Core Proteins	0.00011782293987729036	0.0007462119525561722	1456.09	TPI1;ALDOA
KEGG_2021_Human	RNA degradation	Down-regulated Core Proteins	0.0006791469109190254	0.0032259478268653	471.62	ENO1;ENO2
KEGG_2021_Human	Phenylalanine metabolism	Down-regulated Core Proteins	0.0084693662805775	0.0321835918661948	661.82	MIF
KEGG_2021_Human	Pentose phosphate pathway	Down-regulated Core Proteins	0.0149023554252653	0.0470849134566299	321.69	ALDOA
KEGG_2021_Human	Tyrosine metabolism	Down-regulated Core Proteins	0.0178587410119325	0.0470849134566299	255.0	MIF
KEGG_2021_Human	Glycine, serine and threonine metabolism	Down-regulated Core Proteins	0.019825226718581	0.0470849134566299	222.86	PGAM1

## Sheet: Suppl table S7C
Supplementary Table S7C: An enrichment analysis was performed for KEGG pathway and the main three branches of the Gene Ontology (Biological Processes, Molecular Functions, and Cellular Components) of the differentially abundant proteins under the perturbation of 1uM BPA using a Benjamini-Hochberg threshold=0.05 (correcting for multiple comparisons).
Library	Term	Group	p-value	Adjusted p-value	Combined Score	Genes
GO_Biological_Process_2021	glucose catabolic process to pyruvate (GO:0061718)	Tot Proteins	5.849126796958246e-09	1.5394353312326996e-06	1949.01	TPI1;PGAM1;ENO1;ENO2;ALDOA
GO_Biological_Process_2021	canonical glycolysis (GO:0061621)	Tot Proteins	5.849126796958246e-09	1.5394353312326996e-06	1949.01	TPI1;PGAM1;ENO1;ENO2;ALDOA
GO_Biological_Process_2021	glycolytic process through glucose-6-phosphate (GO:0061620)	Tot Proteins	7.2959020437568715e-09	1.5394353312326996e-06	1829.88	TPI1;PGAM1;ENO1;ENO2;ALDOA
GO_Biological_Process_2021	glycolytic process (GO:0006096)	Tot Proteins	1.616970826805716e-08	2.5588563334200454e-06	1459.83	TPI1;PGAM1;ENO1;ENO2;ALDOA
GO_Biological_Process_2021	gluconeogenesis (GO:0006094)	Tot Proteins	9.947008846264217e-08	1.0494094332808747e-05	874.14	TPI1;PGAM1;ENO1;ENO2;ALDOA
GO_Biological_Process_2021	carbohydrate catabolic process (GO:0016052)	Tot Proteins	9.947008846264217e-08	1.0494094332808747e-05	874.14	TPI1;PGAM1;ENO1;ENO2;ALDOA
GO_Biological_Process_2021	hexose biosynthetic process (GO:0019319)	Tot Proteins	1.4323364011667658e-07	1.2952413456265182e-05	788.53	TPI1;PGAM1;ENO1;ENO2;ALDOA
GO_Biological_Process_2021	SRP-dependent cotranslational protein targeting to membrane (GO:0006614)	Tot Proteins	1.9003493858817357e-07	1.5036514515789232e-05	439.08	RPL14;RPL13;RPL35;RPL29;RPS13;RPL19
GO_Biological_Process_2021	cytoplasmic translation (GO:0002181)	Tot Proteins	2.3116122331248094e-07	1.5596693302684917e-05	418.51	RPL14;RPL13;RPL35;RPL29;RPS13;RPL19
GO_Biological_Process_2021	cotranslational protein targeting to membrane (GO:0006613)	Tot Proteins	2.4639325912614405e-07	1.5596693302684917e-05	412.0	RPL14;RPL13;RPL35;RPL29;RPS13;RPL19
GO_Biological_Process_2021	protein targeting to ER (GO:0045047)	Tot Proteins	4.24418309869988e-07	2.3643381328349574e-05	360.25	RPL14;RPL13;RPL35;RPL29;RPS13;RPL19
GO_Biological_Process_2021	pyruvate metabolic process (GO:0006090)	Tot Proteins	4.482157597791388e-07	2.3643381328349574e-05	570.22	TPI1;PGAM1;ENO1;ENO2;ALDOA
GO_Biological_Process_2021	nuclear-transcribed mRNA catabolic process, nonsense-mediated decay (GO:0000184)	Tot Proteins	7.340450586941263e-07	3.5742347857952456e-05	314.23	RPL14;RPL13;RPL35;RPL29;RPS13;RPL19
GO_Biological_Process_2021	glucose metabolic process (GO:0006006)	Tot Proteins	8.214393250188811e-07	3.7140792338353694e-05	479.29	TPI1;PGAM1;ENO1;ALDOA;ENO2
GO_Biological_Process_2021	peptide biosynthetic process (GO:0043043)	Tot Proteins	5.979138167182105e-06	0.00025231963065508483	183.07	RPL14;RPL13;RPL35;RPL29;RPS13;RPL19
GO_Biological_Process_2021	neutrophil degranulation (GO:0043312)	Tot Proteins	6.934301037436808e-06	0.0002716175938523284	93.84	GM2A;PGAM1;HEXB;LAMP2;PSMB1;COTL1;ALDOA;ARSB;CTSB
GO_Biological_Process_2021	neutrophil activation involved in immune response (GO:0002283)	Tot Proteins	7.411844895093369e-06	0.0002716175938523284	92.51	GM2A;PGAM1;HEXB;LAMP2;PSMB1;COTL1;ALDOA;ARSB;CTSB
GO_Biological_Process_2021	neutrophil mediated immunity (GO:0002446)	Tot Proteins	7.788273583153015e-06	0.0002716175938523284	91.53	GM2A;PGAM1;HEXB;LAMP2;PSMB1;COTL1;ALDOA;ARSB;CTSB
GO_Biological_Process_2021	nuclear-transcribed mRNA catabolic process (GO:0000956)	Tot Proteins	8.152818772818704e-06	0.0002716175938523284	168.55	RPL14;RPL13;RPL35;RPL29;RPS13;RPL19
GO_Biological_Process_2021	cellular protein metabolic process (GO:0044267)	Tot Proteins	1.975850653084212e-05	0.000625356731701153	86.23	RPL14;RPL13;RPL35;RPL29;PRSS23;RPS13;UBE2L3;RPL19
GO_Biological_Process_2021	cellular macromolecule biosynthetic process (GO:0034645)	Tot Proteins	2.637609402387777e-05	0.0007950508341483157	96.34	RPL14;RPL13;RPL35;RPL29;TYMS;RPS13;RPL19
GO_Biological_Process_2021	translation (GO:0006412)	Tot Proteins	2.907891553440793e-05	0.000836679706058192	118.93	RPL14;RPL13;RPL35;RPL29;RPS13;RPL19
GO_Biological_Process_2021	regulation of vacuole organization (GO:0044088)	Tot Proteins	3.0832776538449746e-05	0.0008485716325582038	616.56	ENO1;ENO2;UBQLN2
GO_Biological_Process_2021	rRNA metabolic process (GO:0016072)	Tot Proteins	8.969105248498967e-05	0.0023656015092916	115.15	RPL14;RPL13;RPL35;RPL29;RPL19
GO_Biological_Process_2021	rRNA processing (GO:0006364)	Tot Proteins	0.0001221830884722029	0.0030936758001161	103.98	RPL14;RPL13;RPL35;RPL29;RPL19
GO_Biological_Process_2021	ganglioside catabolic process (GO:0006689)	Tot Proteins	0.00016025245728974483	0.0039015309794003	1290.68	GM2A;HEXB
GO_Biological_Process_2021	ribosome biogenesis (GO:0042254)	Tot Proteins	0.00019875721975079128	0.0046465056409031	88.29	RPL14;RPL13;RPL35;RPL29;RPL19
GO_Biological_Process_2021	regulation of filopodium assembly (GO:0051489)	Tot Proteins	0.00020553263498465665	0.0046465056409031	251.74	GPM6A;RALA;GAP43
GO_Biological_Process_2021	substantia nigra development (GO:0021762)	Tot Proteins	0.00023700221671179864	0.0051731863165023	235.11	CALM3;CKB;NDRG2
GO_Biological_Process_2021	ncRNA processing (GO:0034470)	Tot Proteins	0.0002457784506037849	0.0051859253077398	82.1	RPL14;RPL13;RPL35;RPL29;RPL19
GO_Biological_Process_2021	glycosphingolipid catabolic process (GO:0046479)	Tot Proteins	0.00034155103523569007	0.0069742517840061	736.71	GM2A;HEXB
GO_Biological_Process_2021	gene expression (GO:0010467)	Tot Proteins	0.00046769099875133217	0.0092515125690497	51.51	RPL14;RPL13;RPL35;RPL29;RPS13;RPL19
GO_Biological_Process_2021	glycosaminoglycan catabolic process (GO:0006027)	Tot Proteins	0.000518815360980755	0.0099518219242672	160.69	HEXB;GPC4;ARSB
GO_Biological_Process_2021	chondroitin sulfate catabolic process (GO:0030207)	Tot Proteins	0.0005888380181985052	0.0109627783976368	499.15	HEXB;ARSB
GO_Biological_Process_2021	synaptic membrane adhesion (GO:0099560)	Tot Proteins	0.0006857442847474783	0.0124021752070043	448.16	GPC4;PTPRF
GO_Biological_Process_2021	ceramide catabolic process (GO:0046514)	Tot Proteins	0.0009010346774456688	0.0158431930784196	369.71	GM2A;HEXB
GO_Biological_Process_2021	ganglioside metabolic process (GO:0001573)	Tot Proteins	0.0014164270510532	0.0242323871166682	268.94	GM2A;HEXB
GO_Biological_Process_2021	Wnt signaling pathway (GO:0016055)	Tot Proteins	0.0021889953565273	0.0364640542284691	77.34	SFRP2;WNT8B;GPC4
GO_Biological_Process_2021	positive regulation of filopodium assembly (GO:0051491)	Tot Proteins	0.0023968918556559	0.038903398580262	185.48	GPM6A;RALA
GO_Biological_Process_2021	generation of neurons (GO:0048699)	Tot Proteins	0.0024616223290276	0.0389551733568622	46.08	YAP1;GPM6A;NIF3L1;WNT8B
GO_Biological_Process_2021	chondroitin sulfate metabolic process (GO:0030204)	Tot Proteins	0.0031852247621403	0.0491767627910937	151.46	HEXB;ARSB
GO_Molecular_Function_2021	cadherin binding (GO:0045296)	Tot Proteins	3.0021693060474818e-06	0.0002701952375442733	132.49	LASP1;SERBP1;RPL14;PLIN3;ENO1;ALDOA;RPL29;YWHAZ
GO_Molecular_Function_2021	RNA binding (GO:0003723)	Tot Proteins	0.0004281913564962851	0.0192686110423328	28.15	SERBP1;RPL14;MSN;RPL13;RPL35;ENO1;ALDOA;RPL29;YWHAZ;RPS13;UBE2L3;RPL19
GO_Molecular_Function_2021	ubiquitin protein ligase binding (GO:0031625)	Tot Proteins	0.000865452201059734	0.0256938504560363	52.34	RALA;TPI1;CKB;YWHAZ;UBE2L3
GO_Molecular_Function_2021	ubiquitin-like protein ligase binding (GO:0044389)	Tot Proteins	0.0011419489091571	0.0256938504560363	47.16	RALA;TPI1;CKB;YWHAZ;UBE2L3
GO_Cellular_Component_2021	lysosomal lumen (GO:0043202)	Tot Proteins	1.4473732887837534e-07	1.432899555895916e-05	469.24	GM2A;HEXB;LAMP2;GPC4;ARSB;CTSB
GO_Cellular_Component_2021	cytosolic large ribosomal subunit (GO:0022625)	Tot Proteins	4.482157597791388e-07	1.9521631114585426e-05	570.22	RPL14;RPL35;RPL13;RPL29;RPL19
GO_Cellular_Component_2021	large ribosomal subunit (GO:0015934)	Tot Proteins	6.395819673298617e-07	1.9521631114585426e-05	515.03	RPL14;RPL13;RPL35;RPL29;RPL19
GO_Cellular_Component_2021	ficolin-1-rich granule (GO:0101002)	Tot Proteins	7.887527723064818e-07	1.9521631114585426e-05	224.2	PGAM1;LAMP2;PSMB1;COTL1;ALDOA;ARSB;CTSB
GO_Cellular_Component_2021	ficolin-1-rich granule lumen (GO:1904813)	Tot Proteins	1.2083898604562488e-06	2.3926119237033727e-05	277.09	PGAM1;PSMB1;COTL1;ALDOA;ARSB;CTSB
GO_Cellular_Component_2021	secretory granule lumen (GO:0034774)	Tot Proteins	2.746819107042711e-05	0.0004532251526620473	95.34	GM2A;PGAM1;HEXB;PSMB1;COTL1;ALDOA;ARSB
GO_Cellular_Component_2021	vacuolar lumen (GO:0005775)	Tot Proteins	8.710733434935596e-05	0.001231946585798	116.26	GM2A;HEXB;LAMP2;GPC4;ARSB
GO_Cellular_Component_2021	intracellular organelle lumen (GO:0070013)	Tot Proteins	0.0001077417510742219	0.0013333041695434	45.28	PGAM1;NDUFAB1;PSMB1;COTL1;GPC4;ALDOA;TYMS;PRSS23;ARSB;CTSB
GO_Cellular_Component_2021	cytoplasmic vesicle lumen (GO:0060205)	Tot Proteins	0.0003025314339706988	0.0033278457736776	111.37	PGAM1;PSMB1;COTL1;ALDOA
GO_Cellular_Component_2021	filopodium (GO:0030175)	Tot Proteins	0.0005752280155067126	0.0056947573535164	152.71	GPM6A;GAP43;MSN
GO_Cellular_Component_2021	focal adhesion (GO:0005925)	Tot Proteins	0.0007247342316763771	0.0065226080850873	44.55	RALA;LASP1;MSN;YWHAZ;RPS13;RPL19
GO_Cellular_Component_2021	cell-substrate junction (GO:0030055)	Tot Proteins	0.0007955809565717242	0.0065635428917167	43.16	RALA;LASP1;MSN;YWHAZ;RPS13;RPL19
GO_Cellular_Component_2021	azurophil granule (GO:0042582)	Tot Proteins	0.0009317827887677302	0.0070958843144619	70.36	GM2A;HEXB;LAMP2;ARSB
GO_Cellular_Component_2021	azurophil granule lumen (GO:0035578)	Tot Proteins	0.0020558993712126	0.0139361098222519	79.93	GM2A;HEXB;ARSB
GO_Cellular_Component_2021	lysosome (GO:0005764)	Tot Proteins	0.0021115317912502	0.0139361098222519	30.56	GM2A;HEXB;LAMP2;GPC4;ARSB;CTSB
GO_Cellular_Component_2021	vesicle (GO:0031982)	Tot Proteins	0.0036826556548694	0.0227864318645049	38.3	GPM6A;MSN;CALM3;YWHAZ
GO_Cellular_Component_2021	asymmetric synapse (GO:0032279)	Tot Proteins	0.0061633728032997	0.0339381155208947	43.91	GAP43;RPL14;RPS13
GO_Cellular_Component_2021	cortical actin cytoskeleton (GO:0030864)	Tot Proteins	0.0061705664583444	0.0339381155208947	93.77	LASP1;COTL1
GO_Cellular_Component_2021	postsynaptic density (GO:0014069)	Tot Proteins	0.0068233190275906	0.0355530833542882	41.42	GAP43;RPL14;RPS13
KEGG_2021_Human	Glycolysis / Gluconeogenesis	Tot Proteins	1.2130041450633726e-06	0.0001419214849724146	428.27	TPI1;PGAM1;ENO1;ALDOA;ENO2
KEGG_2021_Human	Ribosome	Tot Proteins	5.178146020793596e-06	0.0003029215422164254	190.18	RPL14;RPL13;RPL35;RPL29;RPS13;RPL19
KEGG_2021_Human	Lysosome	Tot Proteins	2.9192696479892803e-05	0.0011385151627158	164.96	GM2A;HEXB;LAMP2;ARSB;CTSB
KEGG_2021_Human	Coronavirus disease	Tot Proteins	4.567368910950206e-05	0.0013359554064529	104.63	RPL14;RPL13;RPL35;RPL29;RPS13;RPL19
KEGG_2021_Human	Pathways of neurodegeneration	Tot Proteins	0.00034596176005049345	0.0080955051851815	47.38	NDUFAB1;PSMB1;WNT8B;CALM3;NEFM;SLC25A4;UBE2L3
KEGG_2021_Human	Parkinson disease	Tot Proteins	0.0006541011014412774	0.0127549714781049	58.04	NDUFAB1;PSMB1;CALM3;SLC25A4;UBE2L3
KEGG_2021_Human	Glycosaminoglycan degradation	Tot Proteins	0.0012770751216011	0.0213453984610481	289.28	HEXB;ARSB
KEGG_2021_Human	HIF-1 signaling pathway	Tot Proteins	0.0035387981499328	0.044992115685159	59.79	ENO1;ALDOA;ENO2
KEGG_2021_Human	Alzheimer disease	Tot Proteins	0.0036764416315371	0.044992115685159	29.56	NDUFAB1;PSMB1;WNT8B;CALM3;SLC25A4
KEGG_2021_Human	Fructose and mannose metabolism	Tot Proteins	0.0038454799730905	0.044992115685159	132.3	TPI1;ALDOA
GO_Biological_Process_2021	glucose catabolic process to pyruvate (GO:0061718)	Tot Core Proteins	8.337276251690758e-11	1.21831586937931e-08	6093.85	TPI1;PGAM1;ENO1;ENO2;ALDOA
GO_Biological_Process_2021	canonical glycolysis (GO:0061621)	Tot Core Proteins	8.337276251690758e-11	1.21831586937931e-08	6093.85	TPI1;PGAM1;ENO1;ENO2;ALDOA
GO_Biological_Process_2021	glycolytic process through glucose-6-phosphate (GO:0061620)	Tot Core Proteins	1.0412956148541112e-10	1.21831586937931e-08	5733.42	TPI1;PGAM1;ENO1;ENO2;ALDOA
GO_Biological_Process_2021	glycolytic process (GO:0006096)	Tot Core Proteins	2.319767100344074e-10	2.0355956305519248e-08	4610.42	TPI1;PGAM1;ENO1;ALDOA;ENO2
GO_Biological_Process_2021	SRP-dependent cotranslational protein targeting to membrane (GO:0006614)	Tot Core Proteins	1.1589592748025392e-09	5.891650047761029e-08	1538.62	RPL14;RPL35;RPL13;RPL29;RPS13;RPL19
GO_Biological_Process_2021	cytoplasmic translation (GO:0002181)	Tot Core Proteins	1.4154069390057316e-09	5.891650047761029e-08	1470.91	RPL14;RPL35;RPL13;RPL29;RPS13;RPL19
GO_Biological_Process_2021	gluconeogenesis (GO:0006094)	Tot Core Proteins	1.4493484149895302e-09	5.891650047761029e-08	2818.07	TPI1;PGAM1;ENO1;ALDOA;ENO2
GO_Biological_Process_2021	carbohydrate catabolic process (GO:0016052)	Tot Core Proteins	1.4493484149895302e-09	5.891650047761029e-08	2818.07	TPI1;PGAM1;ENO1;ALDOA;ENO2
GO_Biological_Process_2021	cotranslational protein targeting to membrane (GO:0006613)	Tot Core Proteins	1.5106794994259044e-09	5.891650047761029e-08	1449.47	RPL14;RPL35;RPL13;RPL29;RPS13;RPL19
GO_Biological_Process_2021	hexose biosynthetic process (GO:0019319)	Tot Core Proteins	2.09512111454472e-09	7.353875112051969e-08	2553.81	TPI1;PGAM1;ENO1;ALDOA;ENO2
GO_Biological_Process_2021	protein targeting to ER (GO:0045047)	Tot Core Proteins	2.6334895105924924e-09	8.40322562016332e-08	1278.42	RPL14;RPL35;RPL13;RPL29;RPS13;RPL19
GO_Biological_Process_2021	nuclear-transcribed mRNA catabolic process, nonsense-mediated decay (GO:0000184)	Tot Core Proteins	4.6156190162167054e-09	1.3500685622433865e-07	1125.46	RPL14;RPL35;RPL13;RPL29;RPS13;RPL19
GO_Biological_Process_2021	pyruvate metabolic process (GO:0006090)	Tot Core Proteins	6.650019566687537e-09	1.795505283005635e-07	1875.8	TPI1;PGAM1;ENO1;ALDOA;ENO2
GO_Biological_Process_2021	glucose metabolic process (GO:0006006)	Tot Core Proteins	1.2298069275803049e-08	3.0833016541477644e-07	1591.15	TPI1;PGAM1;ENO1;ALDOA;ENO2
GO_Biological_Process_2021	peptide biosynthetic process (GO:0043043)	Tot Core Proteins	4.01233635515803e-08	9.38886707106979e-07	683.29	RPL14;RPL35;RPL13;RPL29;RPS13;RPL19
GO_Biological_Process_2021	nuclear-transcribed mRNA catabolic process (GO:0000956)	Tot Core Proteins	5.536710945517822e-08	1.2146159636729723e-06	633.51	RPL14;RPL35;RPL13;RPL29;RPS13;RPL19
GO_Biological_Process_2021	cellular macromolecule biosynthetic process (GO:0034645)	Tot Core Proteins	8.293486605547086e-08	1.7123610579688394e-06	406.23	RPL14;RPL35;RPL13;RPL29;TYMS;RPS13;RPL19
GO_Biological_Process_2021	translation (GO:0006412)	Tot Core Proteins	2.090643186550499e-07	4.076754213773473e-06	461.58	RPL14;RPL35;RPL13;RPL29;RPS13;RPL19
GO_Biological_Process_2021	cellular protein metabolic process (GO:0044267)	Tot Core Proteins	5.6598112805812e-07	1.0455756628863164e-05	266.95	RPL14;RPL35;RPL13;RPL29;RPS13;UBE2L3;RPL19
GO_Biological_Process_2021	rRNA metabolic process (GO:0016072)	Tot Core Proteins	1.5273654456914447e-06	2.6805263571884856e-05	422.61	RPL14;RPL35;RPL13;RPL29;RPL19
GO_Biological_Process_2021	rRNA processing (GO:0006364)	Tot Core Proteins	2.110280742963027e-06	3.527183527523917e-05	385.2	RPL14;RPL35;RPL13;RPL29;RPL19
GO_Biological_Process_2021	regulation of vacuole organization (GO:0044088)	Tot Core Proteins	2.6153515695720813e-06	4.172674549635457e-05	1841.03	ENO1;ENO2;UBQLN2
GO_Biological_Process_2021	ribosome biogenesis (GO:0042254)	Tot Core Proteins	3.5175557607086867e-06	5.36809596525543e-05	332.21	RPL14;RPL35;RPL13;RPL29;RPL19
GO_Biological_Process_2021	gene expression (GO:0010467)	Tot Core Proteins	4.056989810409607e-06	5.93334759772405e-05	219.83	RPL14;RPL35;RPL13;RPL29;RPS13;RPL19
GO_Biological_Process_2021	ncRNA processing (GO:0034470)	Tot Core Proteins	4.400215363366012e-06	6.17790237016588e-05	311.16	RPL14;RPL35;RPL13;RPL29;RPL19
GO_Biological_Process_2021	response to steroid hormone (GO:0048545)	Tot Core Proteins	0.0008211358169873277	0.0110853335293289	385.03	YAP1;UBE2L3
GO_Biological_Process_2021	substantia nigra development (GO:0021762)	Tot Core Proteins	0.0013126515814769	0.0170644705592004	280.54	CALM3;CKB
GO_Biological_Process_2021	interleukin-12-mediated signaling pathway (GO:0035722)	Tot Core Proteins	0.0015010858723645	0.0188171836142842	256.09	RALA;MSN
GO_Biological_Process_2021	cellular response to interleukin-12 (GO:0071349)	Tot Core Proteins	0.0016334656939331	0.0197705675369149	241.75	RALA;MSN
GO_Biological_Process_2021	positive regulation of establishment of protein localization to mitochondrion (GO:1903749)	Tot Core Proteins	0.0022164873001096	0.0259329014112825	196.06	YWHAZ;UBE2L3
GO_Biological_Process_2021	regulation of organelle assembly (GO:1902115)	Tot Core Proteins	0.0041443015963463	0.0469241890425022	126.58	MSN;UBQLN2
GO_Molecular_Function_2021	RNA binding (GO:0003723)	Tot Core Proteins	3.0592017445781895e-08	1.743744994409568e-06	212.89	SERBP1;RPL14;MSN;RPL35;RPL13;ENO1;RPL29;ALDOA;YWHAZ;RPS13;UBE2L3;RPL19
GO_Molecular_Function_2021	cadherin binding (GO:0045296)	Tot Core Proteins	9.844378584160693e-08	2.805647896485797e-06	391.59	LASP1;SERBP1;RPL14;ENO1;RPL29;ALDOA;YWHAZ
GO_Molecular_Function_2021	ubiquitin protein ligase binding (GO:0031625)	Tot Core Proteins	1.681676311547931e-05	0.00031951849919410687	208.39	RALA;TPI1;CKB;YWHAZ;UBE2L3
GO_Molecular_Function_2021	ubiquitin-like protein ligase binding (GO:0044389)	Tot Core Proteins	2.2676295573242196e-05	0.00032313721191870126	190.12	RALA;TPI1;CKB;YWHAZ;UBE2L3
GO_Molecular_Function_2021	mRNA binding (GO:0003729)	Tot Core Proteins	0.0002974017840718133	0.0033903803384186	117.74	SERBP1;RPL35;TYMS;RPS13
GO_Molecular_Function_2021	hydro-lyase activity (GO:0016836)	Tot Core Proteins	0.0021389615004277	0.0195431795027287	200.93	ENO1;ENO2
GO_Molecular_Function_2021	kinase binding (GO:0019900)	Tot Core Proteins	0.0024000395880544	0.0195431795027287	49.07	PGAM1;MSN;CALM3;YWHAZ
GO_Molecular_Function_2021	protein kinase binding (GO:0019901)	Tot Core Proteins	0.0033578752522066	0.0239248611719722	42.09	PGAM1;MSN;CALM3;YWHAZ
GO_Molecular_Function_2021	phosphotransferase activity, nitrogenous group as acceptor (GO:0016775)	Tot Core Proteins	0.0062349390704731	0.0355391527016969	1056.3	CKB
GO_Molecular_Function_2021	creatine kinase activity (GO:0004111)	Tot Core Proteins	0.0062349390704731	0.0355391527016969	1056.3	CKB
GO_Molecular_Function_2021	fructose binding (GO:0070061)	Tot Core Proteins	0.007477446810139	0.0372977595166187	814.75	ALDOA
GO_Molecular_Function_2021	ubiquitin-protein transferase activator activity (GO:0097027)	Tot Core Proteins	0.0087184638276748	0.0372977595166187	657.63	UBE2L3
GO_Molecular_Function_2021	intramolecular oxidoreductase activity, interconverting aldoses and ketoses (GO:0016861)	Tot Core Proteins	0.0099579917015561	0.0372977595166187	547.86	TPI1
GO_Molecular_Function_2021	aldehyde-lyase activity (GO:0016832)	Tot Core Proteins	0.0099579917015561	0.0372977595166187	547.86	ALDOA
GO_Molecular_Function_2021	carbon-nitrogen ligase activity, with glutamine as amido-N-donor (GO:0016884)	Tot Core Proteins	0.0099579917015561	0.0372977595166187	547.86	ASNS
GO_Molecular_Function_2021	intramolecular transferase activity, phosphotransferases (GO:0016868)	Tot Core Proteins	0.0111960320481715	0.0372977595166187	467.16	PGAM1
GO_Molecular_Function_2021	small ribosomal subunit rRNA binding (GO:0070181)	Tot Core Proteins	0.0111960320481715	0.0372977595166187	467.16	RPS13
GO_Molecular_Function_2021	sequence-specific mRNA binding (GO:1990825)	Tot Core Proteins	0.0124325865055395	0.0372977595166187	405.55	TYMS
GO_Molecular_Function_2021	adenylate cyclase binding (GO:0008179)	Tot Core Proteins	0.0124325865055395	0.0372977595166187	405.55	CALM3
GO_Molecular_Function_2021	titin binding (GO:0031432)	Tot Core Proteins	0.016133351108423	0.0418000460536414	286.06	CALM3
GO_Molecular_Function_2021	protein phosphatase activator activity (GO:0072542)	Tot Core Proteins	0.016133351108423	0.0418000460536414	286.06	CALM3
GO_Molecular_Function_2021	SUMO binding (GO:0032183)	Tot Core Proteins	0.016133351108423	0.0418000460536414	286.06	SERBP1
GO_Molecular_Function_2021	phosphatase activator activity (GO:0019211)	Tot Core Proteins	0.0173639786153884	0.0430324687424843	259.34	CALM3
GO_Cellular_Component_2021	cytosolic large ribosomal subunit (GO:0022625)	Tot Core Proteins	6.650019566687537e-09	2.336907321589264e-07	1875.8	RPL14;RPL35;RPL13;RPL29;RPL19
GO_Cellular_Component_2021	large ribosomal subunit (GO:0015934)	Tot Core Proteins	9.538397230976584e-09	2.336907321589264e-07	1703.24	RPL14;RPL35;RPL13;RPL29;RPL19
GO_Cellular_Component_2021	focal adhesion (GO:0005925)	Tot Core Proteins	6.549027288675456e-06	8.888421564266408e-05	193.85	RALA;LASP1;MSN;YWHAZ;RPS13;RPL19
GO_Cellular_Component_2021	cell-substrate junction (GO:0030055)	Tot Core Proteins	7.255854338176659e-06	8.888421564266408e-05	188.65	RALA;LASP1;MSN;YWHAZ;RPS13;RPL19
GO_Cellular_Component_2021	intracellular non-membrane-bounded organelle (GO:0043232)	Tot Core Proteins	0.0025427063543253	0.0190780182845764	30.83	TPM3;MSN;RPL35;RPL13;RPS13;RPL19
GO_Cellular_Component_2021	ribosome (GO:0005840)	Tot Core Proteins	0.0027092214667341	0.0190780182845764	170.61	RPS13;RPL19
GO_Cellular_Component_2021	vesicle (GO:0031982)	Tot Core Proteins	0.0027254311835109	0.0190780182845764	71.32	MSN;CALM3;YWHAZ
GO_Cellular_Component_2021	nucleus (GO:0005634)	Tot Core Proteins	0.0042420632200704	0.0259826372229314	17.48	YAP1;TPI1;SERBP1;MSN;RPL13;CALM3;ENO1;ALDOA;TYMS;YWHAZ;RPS13;UBE2L3
GO_Cellular_Component_2021	actin cytoskeleton (GO:0015629)	Tot Core Proteins	0.0069456396420249	0.0378151491621358	42.57	LASP1;TPM3;ALDOA
GO_Cellular_Component_2021	cytoplasmic vesicle lumen (GO:0060205)	Tot Core Proteins	0.0090191065694397	0.0393950105581464	71.96	PGAM1;ALDOA
GO_Cellular_Component_2021	ficolin-1-rich granule lumen (GO:1904813)	Tot Core Proteins	0.0102607642781478	0.0393950105581464	65.34	PGAM1;ALDOA
GO_Cellular_Component_2021	pseudopodium (GO:0031143)	Tot Core Proteins	0.0111960320481715	0.0393950105581464	467.16	MSN
GO_Cellular_Component_2021	asymmetric synapse (GO:0032279)	Tot Core Proteins	0.0119133690372256	0.0393950105581464	58.35	RPL14;RPS13
GO_Cellular_Component_2021	nucleolus (GO:0005730)	Tot Core Proteins	0.0122590785875103	0.0393950105581464	22.13	RPL35;RPL13;RPS13;RPL19
GO_Cellular_Component_2021	postsynaptic density (GO:0014069)	Tot Core Proteins	0.0127807567564342	0.0393950105581464	55.3	RPL14;RPS13
GO_Cellular_Component_2021	nuclear lumen (GO:0031981)	Tot Core Proteins	0.012951979785483	0.0393950105581464	21.49	RPL35;RPL13;RPS13;RPL19
GO_Cellular_Component_2021	cell cortex region (GO:0099738)	Tot Core Proteins	0.0136676567242548	0.0393950105581464	357.1	ENO1
GO_Cellular_Component_2021	intracellular membrane-bounded organelle (GO:0043231)	Tot Core Proteins	0.0145349875496319	0.0395674661073314	11.16	YAP1;TPI1;SERBP1;MSN;RPL13;CALM3;ENO1;ALDOA;TYMS;YWHAZ;RPS13;UBE2L3
KEGG_2021_Human	Glycolysis / Gluconeogenesis	Tot Core Proteins	1.8277926388358084e-08	1.3652908137815178e-06	1430.65	TPI1;PGAM1;ENO1;ALDOA;ENO2
KEGG_2021_Human	Ribosome	Tot Core Proteins	3.4564324399532096e-08	1.3652908137815178e-06	707.55	RPL14;RPL35;RPL13;RPL29;RPS13;RPL19
KEGG_2021_Human	Coronavirus disease	Tot Core Proteins	3.362970263892186e-07	8.855821694916089e-06	411.31	RPL14;RPL35;RPL13;RPL29;RPS13;RPL19
KEGG_2021_Human	HIF-1 signaling pathway	Tot Core Proteins	0.0003318593579341887	0.0065542223192002	204.76	ENO1;ALDOA;ENO2
KEGG_2021_Human	Fructose and mannose metabolism	Tot Core Proteins	0.0007734253398115839	0.012220120369023	400.82	TPI1;ALDOA
GO_Biological_Process_2021	SRP-dependent cotranslational protein targeting to membrane (GO:0006614)	Up-regulated Proteins	2.0445347980778585e-11	1.2282251908491316e-09	4373.69	RPL14;RPL35;RPL13;RPL29;RPS13;RPL19
GO_Biological_Process_2021	cytoplasmic translation (GO:0002181)	Up-regulated Proteins	2.5004822390564657e-11	1.2282251908491316e-09	4187.7	RPL14;RPL35;RPL13;RPL29;RPS13;RPL19
GO_Biological_Process_2021	cotranslational protein targeting to membrane (GO:0006613)	Up-regulated Proteins	2.670054762715504e-11	1.2282251908491316e-09	4128.78	RPL14;RPL35;RPL13;RPL29;RPS13;RPL19
GO_Biological_Process_2021	protein targeting to ER (GO:0045047)	Up-regulated Proteins	4.674422502673383e-11	1.612675763422317e-09	3657.88	RPL14;RPL35;RPL13;RPL29;RPS13;RPL19
GO_Biological_Process_2021	nuclear-transcribed mRNA catabolic process, nonsense-mediated decay (GO:0000184)	Up-regulated Proteins	8.231529329094549e-11	2.2719020948300958e-09	3235.51	RPL14;RPL35;RPL13;RPL29;RPS13;RPL19
GO_Biological_Process_2021	cellular macromolecule biosynthetic process (GO:0034645)	Up-regulated Proteins	6.86845086083945e-10	1.443773762367155e-08	1352.46	RPL14;RPL35;RPL13;TYMS;RPL29;RPS13;RPL19
GO_Biological_Process_2021	peptide biosynthetic process (GO:0043043)	Up-regulated Proteins	7.32349009896383e-10	1.443773762367155e-08	2005.38	RPL14;RPL35;RPL13;RPL29;RPS13;RPL19
GO_Biological_Process_2021	nuclear-transcribed mRNA catabolic process (GO:0000956)	Up-regulated Proteins	1.0148996837442451e-09	1.7507019544588232e-08	1865.74	RPL14;RPL35;RPL13;RPL29;RPS13;RPL19
GO_Biological_Process_2021	translation (GO:0006412)	Up-regulated Proteins	3.911076839548922e-09	5.996984487308349e-08	1380.62	RPL14;RPL35;RPL13;RPL29;RPS13;RPL19
GO_Biological_Process_2021	cellular protein metabolic process (GO:0044267)	Up-regulated Proteins	4.928098477418533e-09	6.800775898837575e-08	913.31	RPL14;RPL35;RPL13;RPL29;PRSS23;RPS13;RPL19
GO_Biological_Process_2021	rRNA metabolic process (GO:0016072)	Up-regulated Proteins	6.185065568012003e-08	7.759445894415058e-07	1164.66	RPL14;RPL35;RPL13;RPL29;RPL19
GO_Biological_Process_2021	gene expression (GO:0010467)	Up-regulated Proteins	8.11850910738457e-08	9.117417966175272e-07	686.97	RPL14;RPL35;RPL13;RPL29;RPS13;RPL19
GO_Biological_Process_2021	rRNA processing (GO:0006364)	Up-regulated Proteins	8.588871997121635e-08	9.117417966175272e-07	1066.28	RPL14;RPL35;RPL13;RPL29;RPL19
GO_Biological_Process_2021	ribosome biogenesis (GO:0042254)	Up-regulated Proteins	1.4442014140870618e-07	1.4235699653143894e-06	926.46	RPL14;RPL35;RPL13;RPL29;RPL19
GO_Biological_Process_2021	ncRNA processing (GO:0034470)	Up-regulated Proteins	1.8140803565567534e-07	1.668953928032213e-06	870.72	RPL14;RPL35;RPL13;RPL29;RPL19
GO_Biological_Process_2021	negative regulation of gene expression (GO:0010629)	Up-regulated Proteins	0.0013191698461803	0.0113778399233058	111.49	SFRP2;TYMS;RPS13
GO_Biological_Process_2021	pyrimidine deoxyribonucleotide biosynthetic process (GO:0009221)	Up-regulated Proteins	0.0034953988931204	0.0283744145441544	2173.55	TYMS
GO_Biological_Process_2021	regulation of stem cell division (GO:2000035)	Up-regulated Proteins	0.0055872022837974	0.0405807323770548	1138.86	SFRP2
GO_Biological_Process_2021	aspartate family amino acid biosynthetic process (GO:0009067)	Up-regulated Proteins	0.0055872022837974	0.0405807323770548	1138.86	ASNS
GO_Biological_Process_2021	tetrahydrofolate interconversion (GO:0035999)	Up-regulated Proteins	0.0062835642580931	0.0433565933808425	973.89	TYMS
GO_Biological_Process_2021	hematopoietic stem cell proliferation (GO:0071425)	Up-regulated Proteins	0.0076749307875411	0.0460495847252468	748.3	SFRP2
GO_Biological_Process_2021	somite development (GO:0061053)	Up-regulated Proteins	0.0076749307875411	0.0460495847252468	748.3	SFRP2
GO_Biological_Process_2021	tetrahydrofolate metabolic process (GO:0046653)	Up-regulated Proteins	0.0076749307875411	0.0460495847252468	748.3	TYMS
GO_Molecular_Function_2021	RNA binding (GO:0003723)	Up-regulated Proteins	0.00021924915659261916	0.0035079865054819	83.89	RPL14;RPL35;RPL13;RPL29;RPS13;RPL19
GO_Molecular_Function_2021	mRNA binding (GO:0003729)	Up-regulated Proteins	0.0007350132787055988	0.0058801062296447	149.3	RPL35;TYMS;RPS13
GO_Molecular_Function_2021	carbon-nitrogen ligase activity, with glutamine as amido-N-donor (GO:0016884)	Up-regulated Proteins	0.0055872022837974	0.0223343157766826	1138.86	ASNS
GO_Molecular_Function_2021	small ribosomal subunit rRNA binding (GO:0070181)	Up-regulated Proteins	0.0062835642580931	0.0223343157766826	973.89	RPS13
GO_Molecular_Function_2021	sequence-specific mRNA binding (GO:1990825)	Up-regulated Proteins	0.0069794736802133	0.0223343157766826	847.7	TYMS
GO_Molecular_Function_2021	mRNA 5'-UTR binding (GO:0048027)	Up-regulated Proteins	0.0173639786153884	0.0463039429743691	259.34	RPS13
GO_Molecular_Function_2021	cadherin binding (GO:0045296)	Up-regulated Proteins	0.0206954403371948	0.0473038636278739	39.72	RPL14;RPL29
GO_Cellular_Component_2021	cytosolic large ribosomal subunit (GO:0022625)	Up-regulated Proteins	2.563792312429371e-10	4.052525297666973e-09	4891.93	RPL14;RPL35;RPL13;RPL29;RPL19
GO_Cellular_Component_2021	large ribosomal subunit (GO:0015934)	Up-regulated Proteins	3.684113906969975e-10	4.052525297666973e-09	4454.31	RPL14;RPL35;RPL13;RPL29;RPL19
GO_Cellular_Component_2021	ribosome (GO:0005840)	Up-regulated Proteins	0.0008400240681185265	0.0061601764995358	391.99	RPS13;RPL19
GO_Cellular_Component_2021	nucleolus (GO:0005730)	Up-regulated Proteins	0.0013349462040581	0.006238216311295	69.94	RPL35;RPL13;RPS13;RPL19
GO_Cellular_Component_2021	nuclear lumen (GO:0031981)	Up-regulated Proteins	0.0014177764343852	0.006238216311295	68.14	RPL35;RPL13;RPS13;RPL19
GO_Cellular_Component_2021	asymmetric synapse (GO:0032279)	Up-regulated Proteins	0.0037903316158867	0.0128029121151952	140.84	RPL14;RPS13
GO_Cellular_Component_2021	postsynaptic density (GO:0014069)	Up-regulated Proteins	0.0040736538548348	0.0128029121151952	133.87	RPL14;RPS13
GO_Cellular_Component_2021	intracellular non-membrane-bounded organelle (GO:0043232)	Up-regulated Proteins	0.0070089835238754	0.0192747046906576	32.38	RPL35;RPL13;RPS13;RPL19
KEGG_2021_Human	Ribosome	Up-regulated Proteins	6.296895454705166e-10	4.407826818293617e-09	2073.35	RPL14;RPL35;RPL13;RPL29;RPS13;RPL19
KEGG_2021_Human	Coronavirus disease	Up-regulated Proteins	6.345181000878626e-09	2.2208133503075193e-08	1237.77	RPL14;RPL35;RPL13;RPL29;RPS13;RPL19
KEGG_2021_Human	One carbon pool by folate	Up-regulated Proteins	0.01391373176082	0.03246537410858	345.57	TYMS
KEGG_2021_Human	Alanine, aspartate and glutamate metabolism	Up-regulated Proteins	0.025598893875467	0.0447980642820673	156.24	ASNS
GO_Biological_Process_2021	SRP-dependent cotranslational protein targeting to membrane (GO:0006614)	Up-regulated Core Proteins	7.0061207873035095e-15	7.635204986510559e-14	3893439.39	RPL14;RPL13;RPL35;RPL29;RPS13;RPL19
GO_Biological_Process_2021	cytoplasmic translation (GO:0002181)	Up-regulated Core Proteins	8.577404313372472e-15	7.635204986510559e-14	3868683.98	RPL14;RPL13;RPL35;RPL29;RPS13;RPL19
GO_Biological_Process_2021	cotranslational protein targeting to membrane (GO:0006613)	Up-regulated Core Proteins	9.162245983812667e-15	7.635204986510559e-14	3860611.65	RPL14;RPL13;RPL35;RPL29;RPS13;RPL19
GO_Biological_Process_2021	protein targeting to ER (GO:0045047)	Up-regulated Core Proteins	1.6090032557596266e-14	1.0056270348497669e-13	3791641.13	RPL14;RPL13;RPL35;RPL29;RPS13;RPL19
GO_Biological_Process_2021	nuclear-transcribed mRNA catabolic process, nonsense-mediated decay (GO:0000184)	Up-regulated Core Proteins	2.84319526785349e-14	1.421597633926745e-13	3721803.86	RPL14;RPL13;RPL35;RPL29;RPS13;RPL19
GO_Biological_Process_2021	peptide biosynthetic process (GO:0043043)	Up-regulated Core Proteins	2.5726842675412325e-13	1.0719517781421804e-12	3450461.79	RPL14;RPL13;RPL35;RPL29;RPS13;RPL19
GO_Biological_Process_2021	nuclear-transcribed mRNA catabolic process (GO:0000956)	Up-regulated Core Proteins	3.576360284718343e-13	1.2772715302565512e-12	3409706.87	RPL14;RPL13;RPL35;RPL29;RPS13;RPL19
GO_Biological_Process_2021	translation (GO:0006412)	Up-regulated Core Proteins	1.3988423232982145e-12	4.37138226030692e-12	3240397.87	RPL14;RPL13;RPL35;RPL29;RPS13;RPL19
GO_Biological_Process_2021	cellular macromolecule biosynthetic process (GO:0034645)	Up-regulated Core Proteins	1.4279920114978474e-11	3.966644476382909e-11	2949612.45	RPL14;RPL13;RPL35;RPL29;RPS13;RPL19
GO_Biological_Process_2021	gene expression (GO:0010467)	Up-regulated Core Proteins	3.050215085512557e-11	7.625537713781393e-11	2853867.42	RPL14;RPL13;RPL35;RPL29;RPS13;RPL19
GO_Biological_Process_2021	cellular protein metabolic process (GO:0044267)	Up-regulated Core Proteins	7.927912483950698e-11	1.8017982918069767e-10	2732773.92	RPL14;RPL13;RPL35;RPL29;RPS13;RPL19
GO_Biological_Process_2021	rRNA metabolic process (GO:0016072)	Up-regulated Core Proteins	1.9533445464255624e-10	4.0694678050532547e-10	14123.63	RPL14;RPL13;RPL35;RPL29;RPL19
GO_Biological_Process_2021	rRNA processing (GO:0006364)	Up-regulated Core Proteins	2.7225298109598976e-10	5.235634251845959e-10	12995.64	RPL14;RPL13;RPL35;RPL29;RPL19
GO_Biological_Process_2021	ribosome biogenesis (GO:0042254)	Up-regulated Core Proteins	4.6071513076754007e-10	8.227055906563215e-10	11385.45	RPL14;RPL13;RPL35;RPL29;RPL19
GO_Biological_Process_2021	ncRNA processing (GO:0034470)	Up-regulated Core Proteins	5.804609413084338e-10	9.67434902180723e-10	10741.02	RPL14;RPL13;RPL35;RPL29;RPL19
GO_Biological_Process_2021	maturation of LSU-rRNA from tricistronic rRNA transcript (SSU-rRNA, 5.8S rRNA, LSU-rRNA) (GO:0000463)	Up-regulated Core Proteins	0.0041931197986946	0.0065517496854604	1682.8	RPL35
GO_Biological_Process_2021	negative regulation of RNA metabolic process (GO:0051253)	Up-regulated Core Proteins	0.0056871157389833	0.007898771859699	1147.41	RPS13
GO_Biological_Process_2021	negative regulation of RNA splicing (GO:0033119)	Up-regulated Core Proteins	0.0056871157389833	0.007898771859699	1147.41	RPS13
GO_Biological_Process_2021	maturation of LSU-rRNA (GO:0000470)	Up-regulated Core Proteins	0.007775574144635	0.0102310186113619	775.88	RPL35
GO_Biological_Process_2021	bone development (GO:0060348)	Up-regulated Core Proteins	0.0119415311049953	0.0149269138812441	453.1	RPL13
GO_Biological_Process_2021	ribosomal large subunit biogenesis (GO:0042273)	Up-regulated Core Proteins	0.016980593412106	0.0202149921572691	290.22	RPL14
GO_Biological_Process_2021	ribonucleoprotein complex biogenesis (GO:0022613)	Up-regulated Core Proteins	0.0178676130920248	0.0203041057863918	271.98	RPL14
GO_Biological_Process_2021	regulation of RNA splicing (GO:0043484)	Up-regulated Core Proteins	0.0225871297456579	0.0245512279844108	201.33	RPS13
GO_Biological_Process_2021	skeletal system development (GO:0001501)	Up-regulated Core Proteins	0.0464791191856751	0.0484157491517449	77.55	RPL13
GO_Molecular_Function_2021	RNA binding (GO:0003723)	Up-regulated Core Proteins	1.19499402103172e-07	7.16996412619032e-07	1778325.08	RPL14;RPL13;RPL35;RPL29;RPS13;RPL19
GO_Molecular_Function_2021	mRNA binding (GO:0003729)	Up-regulated Core Proteins	0.002495430463228	0.0053945118718283	226.56	RPL35;RPS13
GO_Molecular_Function_2021	small ribosomal subunit rRNA binding (GO:0070181)	Up-regulated Core Proteins	0.0026972559359141	0.0053945118718283	2955.69	RPS13
GO_Molecular_Function_2021	cadherin binding (GO:0045296)	Up-regulated Core Proteins	0.0037137499991159	0.0055706249986739	172.02	RPL14;RPL29
GO_Molecular_Function_2021	mRNA 5'-UTR binding (GO:0048027)	Up-regulated Core Proteins	0.007477446810139	0.0089729361721668	814.75	RPS13
GO_Molecular_Function_2021	rRNA binding (GO:0019843)	Up-regulated Core Proteins	0.0125354765664381	0.0125354765664381	426.23	RPS13
GO_Cellular_Component_2021	cytosolic large ribosomal subunit (GO:0022625)	Up-regulated Core Proteins	7.811911828812749e-13	8.43043430578609e-12	55599.8	RPL14;RPL13;RPL35;RPL29;RPL19
GO_Cellular_Component_2021	large ribosomal subunit (GO:0015934)	Up-regulated Core Proteins	1.1240579074381454e-12	8.43043430578609e-12	50799.14	RPL14;RPL13;RPL35;RPL29;RPL19
GO_Cellular_Component_2021	nucleolus (GO:0005730)	Up-regulated Core Proteins	2.5306912349198924e-05	0.00010118316264373235	559.42	RPL13;RPL35;RPS13;RPL19
GO_Cellular_Component_2021	nuclear lumen (GO:0031981)	Up-regulated Core Proteins	2.69821767049953e-05	0.00010118316264373235	546.69	RPL13;RPL35;RPS13;RPL19
GO_Cellular_Component_2021	ribosome (GO:0005840)	Up-regulated Core Proteins	0.00014069576561853692	0.0003815847568156527	1473.27	RPS13;RPL19
GO_Cellular_Component_2021	intracellular non-membrane-bounded organelle (GO:0043232)	Up-regulated Core Proteins	0.0001526339027262611	0.0003815847568156527	286.93	RPL13;RPL35;RPS13;RPL19
GO_Cellular_Component_2021	asymmetric synapse (GO:0032279)	Up-regulated Core Proteins	0.000646948912530899	0.0013054347807939	556.71	RPL14;RPS13
GO_Cellular_Component_2021	postsynaptic density (GO:0014069)	Up-regulated Core Proteins	0.000696231883090109	0.0013054347807939	530.75	RPL14;RPS13
GO_Cellular_Component_2021	focal adhesion (GO:0005925)	Up-regulated Core Proteins	0.0053205778297274	0.0082647926680736	133.35	RPS13;RPL19
GO_Cellular_Component_2021	cell-substrate junction (GO:0030055)	Up-regulated Core Proteins	0.0055098617787157	0.0082647926680736	130.04	RPS13;RPL19
GO_Cellular_Component_2021	polysomal ribosome (GO:0042788)	Up-regulated Core Proteins	0.008967337727522	0.0122281878102573	649.09	RPL19
GO_Cellular_Component_2021	cytosolic small ribosomal subunit (GO:0022627)	Up-regulated Core Proteins	0.0119415311049953	0.0149269138812441	453.1	RPS13
GO_Cellular_Component_2021	small ribosomal subunit (GO:0015935)	Up-regulated Core Proteins	0.0134258370265617	0.0154913504152635	390.89	RPS13
KEGG_2021_Human	Ribosome	Up-regulated Core Proteins	2.2089969010481474e-13	4.417993802096295e-13	3469302.39	RPL14;RPL13;RPL35;RPL29;RPS13;RPL19
KEGG_2021_Human	Coronavirus disease	Up-regulated Core Proteins	2.283604910213491e-12	2.283604910213491e-12	3179318.97	RPL14;RPL13;RPL35;RPL29;RPS13;RPL19
GO_Biological_Process_2021	glucose catabolic process to pyruvate (GO:0061718)	Down-regulated Proteins	1.3170957633211282e-09	2.953428956622382e-07	2899.78	TPI1;PGAM1;ENO1;ENO2;ALDOA
GO_Biological_Process_2021	canonical glycolysis (GO:0061621)	Down-regulated Proteins	1.3170957633211282e-09	2.953428956622382e-07	2899.78	TPI1;PGAM1;ENO1;ENO2;ALDOA
GO_Biological_Process_2021	glycolytic process through glucose-6-phosphate (GO:0061620)	Down-regulated Proteins	1.6438380092517895e-09	2.953428956622382e-07	2724.8	TPI1;PGAM1;ENO1;ENO2;ALDOA
GO_Biological_Process_2021	glycolytic process (GO:0006096)	Down-regulated Proteins	3.651714510964514e-09	4.920685303524683e-07	2180.63	TPI1;PGAM1;ENO1;ENO2;ALDOA
GO_Biological_Process_2021	gluconeogenesis (GO:0006094)	Down-regulated Proteins	2.2621897654270562e-08	2.0322004726086383e-06	1316.49	TPI1;PGAM1;ENO1;ENO2;ALDOA
GO_Biological_Process_2021	carbohydrate catabolic process (GO:0016052)	Down-regulated Proteins	2.2621897654270562e-08	2.0322004726086383e-06	1316.49	TPI1;PGAM1;ENO1;ENO2;ALDOA
GO_Biological_Process_2021	hexose biosynthetic process (GO:0019319)	Down-regulated Proteins	3.2631843144974014e-08	2.512651922162999e-06	1189.75	TPI1;PGAM1;ENO1;ALDOA;ENO2
GO_Biological_Process_2021	pyruvate metabolic process (GO:0006090)	Down-regulated Proteins	1.027706561288222e-07	6.924172956679394e-06	865.77	TPI1;PGAM1;ENO1;ALDOA;ENO2
GO_Biological_Process_2021	glucose metabolic process (GO:0006006)	Down-regulated Proteins	1.8911627694137755e-07	1.1325963696822498e-05	730.41	TPI1;PGAM1;ENO1;ALDOA;ENO2
GO_Biological_Process_2021	neutrophil degranulation (GO:0043312)	Down-regulated Proteins	5.500288304361647e-07	2.7871131514958105e-05	162.28	GM2A;PGAM1;HEXB;LAMP2;PSMB1;COTL1;ALDOA;ARSB;CTSB
GO_Biological_Process_2021	neutrophil activation involved in immune response (GO:0002283)	Down-regulated Proteins	5.893971270531737e-07	2.7871131514958105e-05	160.11	GM2A;PGAM1;HEXB;LAMP2;PSMB1;COTL1;ALDOA;ARSB;CTSB
GO_Biological_Process_2021	neutrophil mediated immunity (GO:0002446)	Down-regulated Proteins	6.205075661957278e-07	2.7871131514958105e-05	158.52	GM2A;PGAM1;HEXB;LAMP2;PSMB1;COTL1;ALDOA;ARSB;CTSB
GO_Biological_Process_2021	regulation of vacuole organization (GO:0044088)	Down-regulated Proteins	1.2897043917517367e-05	0.000534731282426297	908.84	ENO1;ENO2;UBQLN2
GO_Biological_Process_2021	regulation of filopodium assembly (GO:0051489)	Down-regulated Proteins	8.683120085209544e-05	0.0032269840253331	377.09	GPM6A;RALA;GAP43
GO_Biological_Process_2021	ganglioside catabolic process (GO:0006689)	Down-regulated Proteins	8.980475024118336e-05	0.0032269840253331	1859.2	GM2A;HEXB
GO_Biological_Process_2021	substantia nigra development (GO:0021762)	Down-regulated Proteins	0.00010023073893269744	0.0033765230177952	352.7	CALM3;CKB;NDRG2
GO_Biological_Process_2021	glycosphingolipid catabolic process (GO:0046479)	Down-regulated Proteins	0.00019167176285246336	0.006077122363381	1067.29	GM2A;HEXB
GO_Biological_Process_2021	glycosaminoglycan catabolic process (GO:0006027)	Down-regulated Proteins	0.0002209045551098438	0.0066148641780114	243.19	HEXB;GPC4;ARSB
GO_Biological_Process_2021	chondroitin sulfate catabolic process (GO:0030207)	Down-regulated Proteins	0.0003309067201768156	0.0093873011671212	726.59	HEXB;ARSB
GO_Biological_Process_2021	synaptic membrane adhesion (GO:0099560)	Down-regulated Proteins	0.0003855442169962099	0.0103904166480478	653.3	GPC4;PTPRF
GO_Biological_Process_2021	ceramide catabolic process (GO:0046514)	Down-regulated Proteins	0.0005070581642096471	0.0130144928813809	540.4	GM2A;HEXB
GO_Biological_Process_2021	ganglioside metabolic process (GO:0001573)	Down-regulated Proteins	0.0007985794740225155	0.0195651971135516	395.07	GM2A;HEXB
GO_Biological_Process_2021	generation of neurons (GO:0048699)	Down-regulated Proteins	0.0008372447581436346	0.019620648897366	74.43	YAP1;GPM6A;NIF3L1;WNT8B
GO_Biological_Process_2021	positive regulation of filopodium assembly (GO:0051491)	Down-regulated Proteins	0.001355132075043	0.0304340078520076	274.25	GPM6A;RALA
GO_Biological_Process_2021	chondroitin sulfate metabolic process (GO:0030204)	Down-regulated Proteins	0.0018041720679571	0.0388979497851568	224.84	HEXB;ARSB
GO_Biological_Process_2021	regulation of mRNA catabolic process (GO:0061013)	Down-regulated Proteins	0.0021372275855875	0.0443063718704494	78.85	SERBP1;PSMB1;YWHAZ
GO_Biological_Process_2021	response to steroid hormone (GO:0048545)	Down-regulated Proteins	0.0023144248687839	0.0449964794341403	188.94	YAP1;UBE2L3
GO_Biological_Process_2021	synapse organization (GO:0050808)	Down-regulated Proteins	0.0023426235242396	0.0449964794341403	75.13	GPM6A;GPC4;PTPRF
GO_Biological_Process_2021	regulation of protein polymerization (GO:0032271)	Down-regulated Proteins	0.0024514342464343	0.0449964794341403	181.47	TPPP3;COTL1
GO_Biological_Process_2021	muscle contraction (GO:0006936)	Down-regulated Proteins	0.0025044422690616	0.0449964794341403	72.52	ASPH;TPM3;ALDOA
GO_Molecular_Function_2021	cadherin binding (GO:0045296)	Down-regulated Proteins	5.350811978246276e-05	0.0043341577023794	101.89	LASP1;SERBP1;PLIN3;ENO1;ALDOA;YWHAZ
GO_Molecular_Function_2021	ubiquitin protein ligase binding (GO:0031625)	Down-regulated Proteins	0.00022406277500669537	0.0080606143080395	86.04	RALA;TPI1;CKB;YWHAZ;UBE2L3
GO_Molecular_Function_2021	ubiquitin-like protein ligase binding (GO:0044389)	Down-regulated Proteins	0.0002985412706681306	0.0080606143080395	77.93	RALA;TPI1;CKB;YWHAZ;UBE2L3
GO_Cellular_Component_2021	lysosomal lumen (GO:0043202)	Down-regulated Proteins	2.4534653716577085e-08	2.2326534882085146e-06	725.68	GM2A;HEXB;LAMP2;GPC4;ARSB;CTSB
GO_Cellular_Component_2021	ficolin-1-rich granule (GO:0101002)	Down-regulated Proteins	1.022653064899312e-07	4.65307144529187e-06	359.76	PGAM1;LAMP2;PSMB1;COTL1;ALDOA;ARSB;CTSB
GO_Cellular_Component_2021	ficolin-1-rich granule lumen (GO:1904813)	Down-regulated Proteins	2.094286651628567e-07	6.352669509939987e-06	434.66	PGAM1;PSMB1;COTL1;ALDOA;ARSB;CTSB
GO_Cellular_Component_2021	secretory granule lumen (GO:0034774)	Down-regulated Proteins	3.860538742210675e-06	8.782725638529285e-05	158.52	GM2A;PGAM1;HEXB;PSMB1;COTL1;ALDOA;ARSB
GO_Cellular_Component_2021	vacuolar lumen (GO:0005775)	Down-regulated Proteins	2.1240569944525843e-05	0.0003865783729903703	184.56	GM2A;HEXB;LAMP2;GPC4;ARSB
GO_Cellular_Component_2021	cytoplasmic vesicle lumen (GO:0060205)	Down-regulated Proteins	9.808112656301275e-05	0.0014875637528723	173.71	PGAM1;PSMB1;COTL1;ALDOA
GO_Cellular_Component_2021	filopodium (GO:0030175)	Down-regulated Proteins	0.00024517941428003225	0.0031873323856404	231.42	GPM6A;GAP43;MSN
GO_Cellular_Component_2021	azurophil granule (GO:0042582)	Down-regulated Proteins	0.0003088371269024412	0.0033448064590111	111.6	GM2A;HEXB;LAMP2;ARSB
GO_Cellular_Component_2021	intracellular organelle lumen (GO:0070013)	Down-regulated Proteins	0.00033080503440770047	0.0033448064590111	42.92	PGAM1;NDUFAB1;PSMB1;COTL1;GPC4;ALDOA;ARSB;CTSB
GO_Cellular_Component_2021	lysosome (GO:0005764)	Down-regulated Proteins	0.0004515549073506596	0.004109149656891	53.12	GM2A;HEXB;LAMP2;GPC4;ARSB;CTSB
GO_Cellular_Component_2021	azurophil granule lumen (GO:0035578)	Down-regulated Proteins	0.0008909526132552673	0.0073706079823844	123.39	GM2A;HEXB;ARSB
GO_Cellular_Component_2021	vesicle (GO:0031982)	Down-regulated Proteins	0.0012690889495576	0.0096239245341454	62.41	GPM6A;MSN;CALM3;YWHAZ
GO_Cellular_Component_2021	cortical actin cytoskeleton (GO:0030864)	Down-regulated Proteins	0.0035145509368019	0.0246018565576137	140.69	LASP1;COTL1
GO_Cellular_Component_2021	actin cytoskeleton (GO:0015629)	Down-regulated Proteins	0.0042664602261899	0.0277319914702344	36.17	LASP1;TPM3;COTL1;ALDOA
GO_Cellular_Component_2021	cortical cytoskeleton (GO:0030863)	Down-regulated Proteins	0.0066058178896844	0.0400752951974189	89.2	LASP1;COTL1
GO_Cellular_Component_2021	focal adhesion (GO:0005925)	Down-regulated Proteins	0.0086540629102828	0.047063367432398	25.55	RALA;LASP1;MSN;YWHAZ
GO_Cellular_Component_2021	cell-substrate junction (GO:0030055)	Down-regulated Proteins	0.0092025103186484	0.047063367432398	24.76	RALA;LASP1;MSN;YWHAZ
GO_Cellular_Component_2021	actin filament (GO:0005884)	Down-regulated Proteins	0.01002695625131	0.047063367432398	65.38	TPM3;COTL1
GO_Cellular_Component_2021	endolysosome lumen (GO:0036021)	Down-regulated Proteins	0.0104569283345458	0.047063367432398	554.88	CTSB
GO_Cellular_Component_2021	neurofibrillary tangle (GO:0097418)	Down-regulated Proteins	0.0104569283345458	0.047063367432398	554.88	NEFM
GO_Cellular_Component_2021	lytic vacuole (GO:0000323)	Down-regulated Proteins	0.0108607770997841	0.047063367432398	31.8	LAMP2;ARSB;CTSB
GO_Cellular_Component_2021	cortical endoplasmic reticulum (GO:0032541)	Down-regulated Proteins	0.0125354765664381	0.0475303486477446	426.23	ASPH
GO_Cellular_Component_2021	cortical granule (GO:0060473)	Down-regulated Proteins	0.0125354765664381	0.0475303486477446	426.23	HEXB
GO_Cellular_Component_2021	platelet dense granule membrane (GO:0031088)	Down-regulated Proteins	0.0125354765664381	0.0475303486477446	426.23	LAMP2
GO_Cellular_Component_2021	actin-based cell projection (GO:0098858)	Down-regulated Proteins	0.0131570746147379	0.0478917515976461	53.14	GPM6A;MSN
KEGG_2021_Human	Glycolysis / Gluconeogenesis	Down-regulated Proteins	2.800789461069297e-07	3.1088763017869195e-05	654.3	TPI1;PGAM1;ENO1;ALDOA;ENO2
KEGG_2021_Human	Lysosome	Down-regulated Proteins	6.983712109740228e-06	0.00038759602209058265	258.71	GM2A;HEXB;LAMP2;ARSB;CTSB
KEGG_2021_Human	Pathways of neurodegeneration	Down-regulated Proteins	5.356356561045503e-05	0.0019818519275868	81.91	NDUFAB1;PSMB1;WNT8B;CALM3;NEFM;SLC25A4;UBE2L3
KEGG_2021_Human	Parkinson disease	Down-regulated Proteins	0.00016779678808540654	0.00465636086937	94.91	NDUFAB1;PSMB1;CALM3;SLC25A4;UBE2L3
KEGG_2021_Human	Glycosaminoglycan degradation	Down-regulated Proteins	0.0007196785738538356	0.0159768643395551	424.43	HEXB;ARSB
KEGG_2021_Human	Alzheimer disease	Down-regulated Proteins	0.0010100367168751	0.01868567926219	50.18	NDUFAB1;PSMB1;WNT8B;CALM3;SLC25A4
KEGG_2021_Human	HIF-1 signaling pathway	Down-regulated Proteins	0.001548695143631	0.0245578801347206	93.21	ENO1;ALDOA;ENO2
KEGG_2021_Human	Fructose and mannose metabolism	Down-regulated Proteins	0.0021811782673054	0.0302638484588634	196.95	TPI1;ALDOA
GO_Biological_Process_2021	glucose catabolic process to pyruvate (GO:0061718)	Down-regulated Core Proteins	9.771615302089714e-12	1.245264173888204e-09	11099.08	TPI1;PGAM1;ENO1;ENO2;ALDOA
GO_Biological_Process_2021	canonical glycolysis (GO:0061621)	Down-regulated Core Proteins	9.771615302089714e-12	1.245264173888204e-09	11099.08	TPI1;PGAM1;ENO1;ENO2;ALDOA
GO_Biological_Process_2021	glycolytic process through glucose-6-phosphate (GO:0061620)	Down-regulated Core Proteins	1.220847229302161e-11	1.245264173888204e-09	10451.0	TPI1;PGAM1;ENO1;ENO2;ALDOA
GO_Biological_Process_2021	glycolytic process (GO:0006096)	Down-regulated Core Proteins	2.7234038541876097e-11	2.083403948453521e-09	8429.4	TPI1;PGAM1;ENO1;ENO2;ALDOA
GO_Biological_Process_2021	gluconeogenesis (GO:0006094)	Down-regulated Core Proteins	1.7083669088840934e-10	8.712671235308877e-09	5192.29	TPI1;PGAM1;ENO1;ENO2;ALDOA
GO_Biological_Process_2021	carbohydrate catabolic process (GO:0016052)	Down-regulated Core Proteins	1.7083669088840934e-10	8.712671235308877e-09	5192.29	TPI1;PGAM1;ENO1;ENO2;ALDOA
GO_Biological_Process_2021	hexose biosynthetic process (GO:0019319)	Down-regulated Core Proteins	2.47202346783354e-10	1.0806274016529476e-08	4713.43	TPI1;PGAM1;ENO1;ENO2;ALDOA
GO_Biological_Process_2021	pyruvate metabolic process (GO:0006090)	Down-regulated Core Proteins	7.875200749022778e-10	3.012264286501213e-08	3481.98	TPI1;PGAM1;ENO1;ENO2;ALDOA
GO_Biological_Process_2021	glucose metabolic process (GO:0006006)	Down-regulated Core Proteins	1.4597911819010483e-09	4.9632900184635646e-08	2963.41	TPI1;PGAM1;ENO1;ENO2;ALDOA
GO_Biological_Process_2021	regulation of vacuole organization (GO:0044088)	Down-regulated Core Proteins	7.776440344533682e-07	2.3795907454273063e-05	3167.3	ENO1;ENO2;UBQLN2
GO_Biological_Process_2021	response to steroid hormone (GO:0048545)	Down-regulated Core Proteins	0.0003754326017445429	0.0104438523758027	655.68	YAP1;UBE2L3
GO_Biological_Process_2021	substantia nigra development (GO:0021762)	Down-regulated Core Proteins	0.0006015962324961352	0.0153407039286514	480.94	CALM3;CKB
GO_Biological_Process_2021	interleukin-12-mediated signaling pathway (GO:0035722)	Down-regulated Core Proteins	0.0006885050542203426	0.0162063497378019	439.93	RALA;MSN
GO_Biological_Process_2021	cellular response to interleukin-12 (GO:0071349)	Down-regulated Core Proteins	0.0007496217439114789	0.0163845895454937	415.84	RALA;MSN
GO_Biological_Process_2021	positive regulation of establishment of protein localization to mitochondrion (GO:1903749)	Down-regulated Core Proteins	0.0010193400070965	0.0207945361447696	338.97	YWHAZ;UBE2L3
GO_Biological_Process_2021	cytokine-mediated signaling pathway (GO:0019221)	Down-regulated Core Proteins	0.0015867608006048	0.0303468003115672	62.25	YAP1;RALA;MSN;YWHAZ
GO_Biological_Process_2021	regulation of organelle assembly (GO:1902115)	Down-regulated Core Proteins	0.0019165497585845	0.0344978956545218	221.46	MSN;UBQLN2
GO_Biological_Process_2021	cellular response to testosterone stimulus (GO:0071394)	Down-regulated Core Proteins	0.0042431439889969	0.0437671623106495	1705.22	MSN
GO_Biological_Process_2021	PML body organization (GO:0030578)	Down-regulated Core Proteins	0.0042431439889969	0.0437671623106495	1705.22	SERBP1
GO_Biological_Process_2021	regulation of mRNA catabolic process (GO:0061013)	Down-regulated Core Proteins	0.00472729225697	0.0437671623106495	118.17	SERBP1;YWHAZ
GO_Biological_Process_2021	positive regulation of plasminogen activation (GO:0010756)	Down-regulated Core Proteins	0.0050897414535705	0.0437671623106495	1318.68	ENO1
GO_Biological_Process_2021	negative regulation of cellular response to hypoxia (GO:1900038)	Down-regulated Core Proteins	0.0050897414535705	0.0437671623106495	1318.68	ENO1
GO_Biological_Process_2021	contact inhibition (GO:0060242)	Down-regulated Core Proteins	0.0050897414535705	0.0437671623106495	1318.68	YAP1
GO_Biological_Process_2021	response to testosterone (GO:0033574)	Down-regulated Core Proteins	0.0050897414535705	0.0437671623106495	1318.68	MSN
GO_Biological_Process_2021	muscle contraction (GO:0006936)	Down-regulated Core Proteins	0.0052692820787968	0.0437671623106495	109.36	TPM3;ALDOA
GO_Biological_Process_2021	aldehyde biosynthetic process (GO:0046184)	Down-regulated Core Proteins	0.0059356619951244	0.0437671623106495	1066.85	TPI1
GO_Biological_Process_2021	gland morphogenesis (GO:0022612)	Down-regulated Core Proteins	0.0059356619951244	0.0437671623106495	1066.85	MSN
GO_Biological_Process_2021	creatine metabolic process (GO:0006600)	Down-regulated Core Proteins	0.0059356619951244	0.0437671623106495	1066.85	CKB
GO_Biological_Process_2021	glyceraldehyde-3-phosphate metabolic process (GO:0019682)	Down-regulated Core Proteins	0.0059356619951244	0.0437671623106495	1066.85	TPI1
GO_Biological_Process_2021	positive regulation of ER-associated ubiquitin-dependent protein catabolic process (GO:1903071)	Down-regulated Core Proteins	0.0059356619951244	0.0437671623106495	1066.85	UBQLN2
GO_Biological_Process_2021	positive regulation of intracellular estrogen receptor signaling pathway (GO:0033148)	Down-regulated Core Proteins	0.0059356619951244	0.0437671623106495	1066.85	YAP1
GO_Biological_Process_2021	regulation of mRNA stability (GO:0043488)	Down-regulated Core Proteins	0.0066987426430587	0.0437671623106495	91.95	SERBP1;YWHAZ
GO_Biological_Process_2021	establishment of Golgi localization (GO:0051683)	Down-regulated Core Proteins	0.0067809060200976	0.0437671623106495	890.65	YWHAZ
GO_Biological_Process_2021	positive regulation of protein localization to early endosome (GO:1902966)	Down-regulated Core Proteins	0.0067809060200976	0.0437671623106495	890.65	MSN
GO_Biological_Process_2021	positive regulation of protein localization to endosome (GO:1905668)	Down-regulated Core Proteins	0.0067809060200976	0.0437671623106495	890.65	MSN
GO_Biological_Process_2021	fructose metabolic process (GO:0006000)	Down-regulated Core Proteins	0.0067809060200976	0.0437671623106495	890.65	ALDOA
GO_Biological_Process_2021	positive regulation of ryanodine-sensitive calcium-release channel activity (GO:0060316)	Down-regulated Core Proteins	0.0067809060200976	0.0437671623106495	890.65	CALM3
GO_Biological_Process_2021	positive regulation of early endosome to late endosome transport (GO:2000643)	Down-regulated Core Proteins	0.0067809060200976	0.0437671623106495	890.65	MSN
GO_Biological_Process_2021	positive regulation of intracellular steroid hormone receptor signaling pathway (GO:0033145)	Down-regulated Core Proteins	0.0067809060200976	0.0437671623106495	890.65	YAP1
GO_Biological_Process_2021	progesterone receptor signaling pathway (GO:0050847)	Down-regulated Core Proteins	0.0067809060200976	0.0437671623106495	890.65	YAP1
GO_Biological_Process_2021	regulation of cyclic-nucleotide phosphodiesterase activity (GO:0051342)	Down-regulated Core Proteins	0.0067809060200976	0.0437671623106495	890.65	CALM3
GO_Biological_Process_2021	immunological synapse formation (GO:0001771)	Down-regulated Core Proteins	0.0067809060200976	0.0437671623106495	890.65	MSN
GO_Biological_Process_2021	regulation of protein localization to early endosome (GO:1902965)	Down-regulated Core Proteins	0.0067809060200976	0.0437671623106495	890.65	MSN
GO_Biological_Process_2021	positive regulation of muscle contraction (GO:0045933)	Down-regulated Core Proteins	0.0067809060200976	0.0437671623106495	890.65	ENO1
GO_Biological_Process_2021	positive regulation of intracellular protein transport (GO:0090316)	Down-regulated Core Proteins	0.0068773120248587	0.0437671623106495	90.21	YWHAZ;UBE2L3
GO_Biological_Process_2021	cellular response to organic cyclic compound (GO:0071407)	Down-regulated Core Proteins	0.0070580458028467	0.0437671623106495	88.52	MSN;UBE2L3
GO_Biological_Process_2021	actin filament organization (GO:0007015)	Down-regulated Core Proteins	0.007240937002024	0.0437671623106495	86.88	TPM3;ALDOA
GO_Biological_Process_2021	ketone biosynthetic process (GO:0042181)	Down-regulated Core Proteins	0.0076254739654265	0.0437671623106495	760.96	TPI1
GO_Biological_Process_2021	positive regulation of ATP biosynthetic process (GO:2001171)	Down-regulated Core Proteins	0.0076254739654265	0.0437671623106495	760.96	ENO1
GO_Biological_Process_2021	fructose 1,6-bisphosphate metabolic process (GO:0030388)	Down-regulated Core Proteins	0.0076254739654265	0.0437671623106495	760.96	ALDOA
GO_Biological_Process_2021	regulation of ER-associated ubiquitin-dependent protein catabolic process (GO:1903069)	Down-regulated Core Proteins	0.0076254739654265	0.0437671623106495	760.96	UBQLN2
GO_Biological_Process_2021	intestinal epithelial cell differentiation (GO:0060575)	Down-regulated Core Proteins	0.0076254739654265	0.0437671623106495	760.96	YAP1
GO_Biological_Process_2021	regulation of high voltage-gated calcium channel activity (GO:1901841)	Down-regulated Core Proteins	0.0084693662805775	0.0437671623106495	661.82	CALM3
GO_Biological_Process_2021	negative regulation of voltage-gated calcium channel activity (GO:1901386)	Down-regulated Core Proteins	0.0084693662805775	0.0437671623106495	661.82	CALM3
GO_Biological_Process_2021	modulation by symbiont of host process (GO:0044003)	Down-regulated Core Proteins	0.0084693662805775	0.0437671623106495	661.82	ENO1
GO_Biological_Process_2021	protein deneddylation (GO:0000338)	Down-regulated Core Proteins	0.0084693662805775	0.0437671623106495	661.82	COPS7B
GO_Biological_Process_2021	regulation of epithelial cell apoptotic process (GO:1904035)	Down-regulated Core Proteins	0.0084693662805775	0.0437671623106495	661.82	YAP1
GO_Biological_Process_2021	establishment of epithelial cell apical/basal polarity (GO:0045198)	Down-regulated Core Proteins	0.0093125834341288	0.0437671623106495	583.76	MSN
GO_Biological_Process_2021	regulation of synapse maturation (GO:0090128)	Down-regulated Core Proteins	0.0093125834341288	0.0437671623106495	583.76	YWHAZ
GO_Biological_Process_2021	positive regulation of cytoplasmic transport (GO:1903651)	Down-regulated Core Proteins	0.0093125834341288	0.0437671623106495	583.76	MSN
GO_Biological_Process_2021	regulation of lymphocyte migration (GO:2000401)	Down-regulated Core Proteins	0.0093125834341288	0.0437671623106495	583.76	MSN
GO_Biological_Process_2021	glycerol metabolic process (GO:0006071)	Down-regulated Core Proteins	0.0093125834341288	0.0437671623106495	583.76	TPI1
GO_Biological_Process_2021	Golgi inheritance (GO:0048313)	Down-regulated Core Proteins	0.0093125834341288	0.0437671623106495	583.76	YWHAZ
GO_Biological_Process_2021	negative regulation of ryanodine-sensitive calcium-release channel activity (GO:0060315)	Down-regulated Core Proteins	0.0101551258956082	0.0437671623106495	520.84	CALM3
GO_Biological_Process_2021	negative regulation of cilium assembly (GO:1902018)	Down-regulated Core Proteins	0.0101551258956082	0.0437671623106495	520.84	YAP1
GO_Biological_Process_2021	nuclear body organization (GO:0030575)	Down-regulated Core Proteins	0.0101551258956082	0.0437671623106495	520.84	SERBP1
GO_Biological_Process_2021	Golgi localization (GO:0051645)	Down-regulated Core Proteins	0.0101551258956082	0.0437671623106495	520.84	YWHAZ
GO_Biological_Process_2021	regulation of cell communication by electrical coupling involved in cardiac conduction (GO:1901844)	Down-regulated Core Proteins	0.0101551258956082	0.0437671623106495	520.84	CALM3
GO_Biological_Process_2021	regulation of plasminogen activation (GO:0010755)	Down-regulated Core Proteins	0.0101551258956082	0.0437671623106495	520.84	ENO1
GO_Biological_Process_2021	negative regulation of receptor internalization (GO:0002091)	Down-regulated Core Proteins	0.0101551258956082	0.0437671623106495	520.84	UBQLN2
GO_Biological_Process_2021	negative regulation of release of sequestered calcium ion into cytosol (GO:0051280)	Down-regulated Core Proteins	0.0101551258956082	0.0437671623106495	520.84	CALM3
GO_Biological_Process_2021	positive regulation of purine nucleotide biosynthetic process (GO:1900373)	Down-regulated Core Proteins	0.0109969941425308	0.0442773711528215	469.12	ENO1
GO_Biological_Process_2021	positive regulation of ERAD pathway (GO:1904294)	Down-regulated Core Proteins	0.0109969941425308	0.0442773711528215	469.12	UBQLN2
GO_Biological_Process_2021	regulation of cell communication by electrical coupling (GO:0010649)	Down-regulated Core Proteins	0.0109969941425308	0.0442773711528215	469.12	CALM3
GO_Biological_Process_2021	detection of calcium ion (GO:0005513)	Down-regulated Core Proteins	0.0109969941425308	0.0442773711528215	469.12	CALM3
GO_Biological_Process_2021	protein localization to mitochondrion (GO:0070585)	Down-regulated Core Proteins	0.0109969941425308	0.0442773711528215	469.12	RALA
GO_Biological_Process_2021	polarized epithelial cell differentiation (GO:0030859)	Down-regulated Core Proteins	0.0118381886593292	0.0470452692175943	425.94	MSN
GO_Biological_Process_2021	modification-dependent protein catabolic process (GO:0019941)	Down-regulated Core Proteins	0.0123767346179499	0.0478973486381693	58.22	UBE2L3;UBQLN2
GO_Biological_Process_2021	establishment of apical/basal cell polarity (GO:0035089)	Down-regulated Core Proteins	0.012678709933633	0.0478973486381693	389.38	MSN
GO_Biological_Process_2021	T cell proliferation (GO:0042098)	Down-regulated Core Proteins	0.012678709933633	0.0478973486381693	389.38	MSN
GO_Biological_Process_2021	regulation of clathrin-dependent endocytosis (GO:2000369)	Down-regulated Core Proteins	0.012678709933633	0.0478973486381693	389.38	UBQLN2
GO_Biological_Process_2021	regulation of ATP biosynthetic process (GO:2001169)	Down-regulated Core Proteins	0.0135185584535393	0.0489478862368754	358.07	ENO1
GO_Biological_Process_2021	regulation of phosphate metabolic process (GO:0019220)	Down-regulated Core Proteins	0.0135185584535393	0.0489478862368754	358.07	PGAM1
GO_Biological_Process_2021	cellular response to corticosteroid stimulus (GO:0071384)	Down-regulated Core Proteins	0.0135185584535393	0.0489478862368754	358.07	UBE2L3
GO_Biological_Process_2021	cellular response to gamma radiation (GO:0071480)	Down-regulated Core Proteins	0.0143577347072013	0.0489478862368754	330.97	YAP1
GO_Biological_Process_2021	regulation of stem cell proliferation (GO:0072091)	Down-regulated Core Proteins	0.0143577347072013	0.0489478862368754	330.97	YAP1
GO_Biological_Process_2021	regulation of cardiac muscle contraction by regulation of the release of sequestered calcium ion (GO:0010881)	Down-regulated Core Proteins	0.0143577347072013	0.0489478862368754	330.97	CALM3
GO_Biological_Process_2021	negative regulation of peptidyl-threonine phosphorylation (GO:0010801)	Down-regulated Core Proteins	0.0143577347072013	0.0489478862368754	330.97	CALM3
GO_Biological_Process_2021	cellular response to lipid (GO:0071396)	Down-regulated Core Proteins	0.0145677486929034	0.0489478862368754	51.36	MSN;UBE2L3
GO_Biological_Process_2021	cellular response to glucocorticoid stimulus (GO:0071385)	Down-regulated Core Proteins	0.0151962391911868	0.0489478862368754	307.32	UBE2L3
GO_Biological_Process_2021	positive regulation of phosphoprotein phosphatase activity (GO:0032516)	Down-regulated Core Proteins	0.0151962391911868	0.0489478862368754	307.32	CALM3
GO_Biological_Process_2021	T cell migration (GO:0072678)	Down-regulated Core Proteins	0.0151962391911868	0.0489478862368754	307.32	MSN
GO_Biological_Process_2021	regulation of cellular protein catabolic process (GO:1903362)	Down-regulated Core Proteins	0.0151962391911868	0.0489478862368754	307.32	MSN
GO_Biological_Process_2021	regulation of early endosome to late endosome transport (GO:2000641)	Down-regulated Core Proteins	0.0151962391911868	0.0489478862368754	307.32	MSN
GO_Biological_Process_2021	interleukin-6-mediated signaling pathway (GO:0070102)	Down-regulated Core Proteins	0.0151962391911868	0.0489478862368754	307.32	YAP1
GO_Molecular_Function_2021	ubiquitin protein ligase binding (GO:0031625)	Down-regulated Core Proteins	2.136160233747898e-06	7.53186254940721e-05	412.68	RALA;TPI1;CKB;YWHAZ;UBE2L3
GO_Molecular_Function_2021	ubiquitin-like protein ligase binding (GO:0044389)	Down-regulated Core Proteins	2.8968702113104657e-06	7.53186254940721e-05	377.99	RALA;TPI1;CKB;YWHAZ;UBE2L3
GO_Molecular_Function_2021	cadherin binding (GO:0045296)	Down-regulated Core Proteins	5.535222241460967e-06	9.594385218532342e-05	312.89	LASP1;SERBP1;ENO1;ALDOA;YWHAZ
GO_Molecular_Function_2021	kinase binding (GO:0019900)	Down-regulated Core Proteins	0.0005223970217491849	0.0065191306041886	99.35	PGAM1;MSN;CALM3;YWHAZ
GO_Molecular_Function_2021	protein kinase binding (GO:0019901)	Down-regulated Core Proteins	0.0007413871700154963	0.0065191306041886	86.06	PGAM1;MSN;CALM3;YWHAZ
GO_Molecular_Function_2021	RNA binding (GO:0003723)	Down-regulated Core Proteins	0.0007522073774063831	0.0065191306041886	52.07	SERBP1;MSN;ENO1;ALDOA;YWHAZ;UBE2L3
GO_Molecular_Function_2021	hydro-lyase activity (GO:0016836)	Down-regulated Core Proteins	0.0009834258801979265	0.007305449395756	347.18	ENO1;ENO2
GO_Molecular_Function_2021	phosphotransferase activity, nitrogenous group as acceptor (GO:0016775)	Down-regulated Core Proteins	0.0042431439889969	0.0245159430475378	1705.22	CKB
GO_Molecular_Function_2021	creatine kinase activity (GO:0004111)	Down-regulated Core Proteins	0.0042431439889969	0.0245159430475378	1705.22	CKB
GO_Molecular_Function_2021	fructose binding (GO:0070061)	Down-regulated Core Proteins	0.0050897414535705	0.0264666555585669	1318.68	ALDOA
GO_Molecular_Function_2021	ubiquitin-protein transferase activator activity (GO:0097027)	Down-regulated Core Proteins	0.0059356619951244	0.0271236240803904	1066.85	UBE2L3
GO_Molecular_Function_2021	intramolecular oxidoreductase activity, interconverting aldoses and ketoses (GO:0016861)	Down-regulated Core Proteins	0.0067809060200976	0.0271236240803904	890.65	TPI1
GO_Molecular_Function_2021	aldehyde-lyase activity (GO:0016832)	Down-regulated Core Proteins	0.0067809060200976	0.0271236240803904	890.65	ALDOA
GO_Molecular_Function_2021	intramolecular transferase activity, phosphotransferases (GO:0016868)	Down-regulated Core Proteins	0.0076254739654265	0.0283231890144414	760.96	PGAM1
GO_Molecular_Function_2021	adenylate cyclase binding (GO:0008179)	Down-regulated Core Proteins	0.0084693662805775	0.0293604697726689	661.82	CALM3
GO_Molecular_Function_2021	titin binding (GO:0031432)	Down-regulated Core Proteins	0.0109969941425308	0.0317690941895335	469.12	CALM3
GO_Molecular_Function_2021	protein phosphatase activator activity (GO:0072542)	Down-regulated Core Proteins	0.0109969941425308	0.0317690941895335	469.12	CALM3
GO_Molecular_Function_2021	SUMO binding (GO:0032183)	Down-regulated Core Proteins	0.0109969941425308	0.0317690941895335	469.12	SERBP1
GO_Molecular_Function_2021	phosphatase activator activity (GO:0019211)	Down-regulated Core Proteins	0.0118381886593292	0.0323992531729012	425.94	CALM3
GO_Molecular_Function_2021	DNA-binding transcription factor binding (GO:0140297)	Down-regulated Core Proteins	0.0132099568936911	0.034345887923597	55.39	YAP1;YWHAZ
GO_Molecular_Function_2021	disordered domain specific binding (GO:0097718)	Down-regulated Core Proteins	0.0193787023349683	0.0479853581627788	223.63	CALM3
GO_Cellular_Component_2021	focal adhesion (GO:0005925)	Down-regulated Core Proteins	0.0002690332618324819	0.0050409488984732	129.44	RALA;LASP1;MSN;YWHAZ
GO_Cellular_Component_2021	cell-substrate junction (GO:0030055)	Down-regulated Core Proteins	0.0002880542227698988	0.0050409488984732	126.02	RALA;LASP1;MSN;YWHAZ
GO_Cellular_Component_2021	vesicle (GO:0031982)	Down-regulated Core Proteins	0.0008612342748706758	0.0100477332068245	134.0	MSN;CALM3;YWHAZ
GO_Cellular_Component_2021	actin cytoskeleton (GO:0015629)	Down-regulated Core Proteins	0.0022540410712308	0.0197228593732699	82.08	LASP1;TPM3;ALDOA
GO_Cellular_Component_2021	cytoplasmic vesicle lumen (GO:0060205)	Down-regulated Core Proteins	0.0042129440595182	0.0280176995459995	128.24	PGAM1;ALDOA
GO_Cellular_Component_2021	ficolin-1-rich granule lumen (GO:1904813)	Down-regulated Core Proteins	0.0048030342078856	0.0280176995459995	116.84	PGAM1;ALDOA
GO_Cellular_Component_2021	nucleus (GO:0005634)	Down-regulated Core Proteins	0.0058264721120117	0.0291323605600588	20.06	YAP1;TPI1;SERBP1;MSN;CALM3;ENO1;ALDOA;YWHAZ;UBE2L3
GO_Cellular_Component_2021	pseudopodium (GO:0031143)	Down-regulated Core Proteins	0.0076254739654265	0.0333614485987411	760.96	MSN
GO_Cellular_Component_2021	cell cortex region (GO:0099738)	Down-regulated Core Proteins	0.0093125834341288	0.0362156022438343	583.76	ENO1
GO_Cellular_Component_2021	ficolin-1-rich granule (GO:0101002)	Down-regulated Core Proteins	0.0104549724305987	0.0365924035070957	66.16	PGAM1;ALDOA
GO_Cellular_Component_2021	cytoskeleton (GO:0005856)	Down-regulated Core Proteins	0.0133489489126557	0.0424739283584501	30.03	TPM3;MSN;ALDOA
GO_Cellular_Component_2021	intracellular membrane-bounded organelle (GO:0043231)	Down-regulated Core Proteins	0.0158981158080693	0.0463695044402023	13.3	YAP1;TPI1;SERBP1;MSN;CALM3;ENO1;ALDOA;YWHAZ;UBE2L3
KEGG_2021_Human	Glycolysis / Gluconeogenesis	Down-regulated Core Proteins	2.173230381584124e-09	1.608190482372252e-07	2670.47	TPI1;PGAM1;ENO1;ENO2;ALDOA
KEGG_2021_Human	HIF-1 signaling pathway	Down-regulated Core Proteins	0.0001012781420617614	0.0037472912562851	369.59	ENO1;ENO2;ALDOA
KEGG_2021_Human	Fructose and mannose metabolism	Down-regulated Core Proteins	0.0003535248152475582	0.0087202787761064	682.02	TPI1;ALDOA
KEGG_2021_Human	RNA degradation	Down-regulated Core Proteins	0.0020160625157912	0.0372971565421385	213.94	ENO1;ENO2

## Sheet: Suppl table S7D
Supplementary Table S7D: An enrichment analysis was performed for KEGG pathway and the main three branches of the Gene Ontology (Biological Processes, Molecular Functions, and Cellular Components) of the differentially abundant proteins commonly perturbed by 0.1uM and 1uM BPA using a Benjamini-Hochberg threshold=0.05 (correcting for multiple comparisons).
Library	Term	Group	p-value	Adjusted p-value	Combined Score	Genes
GO_Biological_Process_2021	glucose catabolic process to pyruvate (GO:0061718)	Tot Proteins	6.675075921296668e-11	6.725402843030545e-09	6476.37	TPI1;PGAM1;ENO1;ENO2;ALDOA
GO_Biological_Process_2021	canonical glycolysis (GO:0061621)	Tot Proteins	6.675075921296668e-11	6.725402843030545e-09	6476.37	TPI1;PGAM1;ENO1;ENO2;ALDOA
GO_Biological_Process_2021	glycolytic process through glucose-6-phosphate (GO:0061620)	Tot Proteins	8.337276251690758e-11	6.725402843030545e-09	6093.85	TPI1;PGAM1;ENO1;ENO2;ALDOA
GO_Biological_Process_2021	glycolytic process (GO:0006096)	Tot Proteins	1.8576635810901455e-10	1.1238864665595382e-08	4901.92	TPI1;PGAM1;ENO1;ENO2;ALDOA
GO_Biological_Process_2021	gluconeogenesis (GO:0006094)	Tot Proteins	1.16121599751527e-09	4.6835711899782566e-08	2998.84	TPI1;PGAM1;ENO1;ENO2;ALDOA
GO_Biological_Process_2021	carbohydrate catabolic process (GO:0016052)	Tot Proteins	1.16121599751527e-09	4.6835711899782566e-08	2998.84	TPI1;PGAM1;ENO1;ENO2;ALDOA
GO_Biological_Process_2021	hexose biosynthetic process (GO:0019319)	Tot Proteins	1.6788183824181112e-09	5.8039149792168994e-08	2718.16	TPI1;PGAM1;ENO1;ENO2;ALDOA
GO_Biological_Process_2021	pyruvate metabolic process (GO:0006090)	Tot Proteins	5.331100190958756e-09	1.6126578077650237e-07	1997.81	TPI1;PGAM1;ENO1;ENO2;ALDOA
GO_Biological_Process_2021	glucose metabolic process (GO:0006006)	Tot Proteins	9.861834097685088e-09	2.6517376129331017e-07	1695.28	TPI1;PGAM1;ENO1;ENO2;ALDOA
GO_Biological_Process_2021	synaptic membrane adhesion (GO:0099560)	Tot Proteins	0.000124480947880634	0.0030124389387113	1359.87	GPC4;PTPRF
GO_Biological_Process_2021	Wnt signaling pathway (GO:0016055)	Tot Proteins	0.0001777476099679932	0.0039104474192958	275.65	SFRP2;WNT8B;GPC4
GO_Biological_Process_2021	regulation of vacuole organization (GO:0044088)	Tot Proteins	0.000314144742212557	0.0063352523012865	731.63	ENO1;ENO2
GO_Biological_Process_2021	regulation of protein polymerization (GO:0032271)	Tot Proteins	0.0008014959660444926	0.0149201556755974	391.66	TPPP3;COTL1
GO_Biological_Process_2021	regulation of filopodium assembly (GO:0051489)	Tot Proteins	0.0010997425892605	0.0190098361857901	316.61	RALA;GAP43
GO_Biological_Process_2021	substantia nigra development (GO:0021762)	Tot Proteins	0.0012092868136118	0.0195098272596043	296.94	CKB;NDRG2
GO_Biological_Process_2021	neutrophil degranulation (GO:0043312)	Tot Proteins	0.002395677068454	0.0338628380345513	49.33	PGAM1;COTL1;ALDOA;CTSB
GO_Biological_Process_2021	neutrophil activation involved in immune response (GO:0002283)	Tot Proteins	0.0024686832372467	0.0338628380345513	48.67	PGAM1;COTL1;ALDOA;CTSB
GO_Biological_Process_2021	neutrophil mediated immunity (GO:0002446)	Tot Proteins	0.0025244399073755	0.0338628380345513	48.18	PGAM1;COTL1;ALDOA;CTSB
GO_Biological_Process_2021	negative regulation of intrinsic apoptotic signaling pathway (GO:2001243)	Tot Proteins	0.0026586525729606	0.0338628380345513	173.15	SFRP2;ENO1
GO_Biological_Process_2021	canonical Wnt signaling pathway (GO:0060070)	Tot Proteins	0.0029954011693546	0.0362443541491911	159.35	SFRP2;WNT8B
GO_Molecular_Function_2021	hydro-lyase activity (GO:0016836)	Tot Proteins	0.0019713124920084	0.0367743950685659	212.87	ENO1;ENO2
GO_Molecular_Function_2021	ubiquitin protein ligase binding (GO:0031625)	Tot Proteins	0.0037887271214542	0.0367743950685659	59.93	RALA;TPI1;CKB
GO_Molecular_Function_2021	ubiquitin-like protein ligase binding (GO:0044389)	Tot Proteins	0.0045082460861401	0.0367743950685659	54.48	RALA;TPI1;CKB
GO_Molecular_Function_2021	tubulin binding (GO:0015631)	Tot Proteins	0.005708694679729	0.0367743950685659	47.75	TPPP3;NEFM;ALDOA
GO_Molecular_Function_2021	phosphotransferase activity, nitrogenous group as acceptor (GO:0016775)	Tot Proteins	0.005986138987596	0.0367743950685659	1111.12	CKB
GO_Molecular_Function_2021	creatine kinase activity (GO:0004111)	Tot Proteins	0.005986138987596	0.0367743950685659	1111.12	CKB
GO_Molecular_Function_2021	cadherin binding (GO:0045296)	Tot Proteins	0.0065129786430667	0.0367743950685659	44.31	LASP1;ENO1;ALDOA
GO_Molecular_Function_2021	coreceptor activity involved in Wnt signaling pathway, planar cell polarity pathway (GO:1904929)	Tot Proteins	0.0071792448741713	0.0367743950685659	857.29	GPC4
GO_Molecular_Function_2021	fructose binding (GO:0070061)	Tot Proteins	0.0071792448741713	0.0367743950685659	857.29	ALDOA
GO_Molecular_Function_2021	coreceptor activity involved in Wnt signaling pathway (GO:0071936)	Tot Proteins	0.0095613427178271	0.0367743950685659	576.75	GPC4
GO_Molecular_Function_2021	intramolecular oxidoreductase activity, interconverting aldoses and ketoses (GO:0016861)	Tot Proteins	0.0095613427178271	0.0367743950685659	576.75	TPI1
GO_Molecular_Function_2021	aldehyde-lyase activity (GO:0016832)	Tot Proteins	0.0095613427178271	0.0367743950685659	576.75	ALDOA
GO_Molecular_Function_2021	carbon-nitrogen ligase activity, with glutamine as amido-N-donor (GO:0016884)	Tot Proteins	0.0095613427178271	0.0367743950685659	576.75	ASNS
GO_Molecular_Function_2021	intramolecular transferase activity, phosphotransferases (GO:0016868)	Tot Proteins	0.0107503374648081	0.0383940623743146	491.91	PGAM1
GO_Cellular_Component_2021	ficolin-1-rich granule lumen (GO:1904813)	Tot Proteins	1.3158181875513597e-05	0.0005921181843981119	375.06	PGAM1;COTL1;ALDOA;CTSB
GO_Cellular_Component_2021	ficolin-1-rich granule (GO:0101002)	Tot Proteins	6.37910315316294e-05	0.0014352982094616	212.47	PGAM1;COTL1;ALDOA;CTSB
GO_Cellular_Component_2021	cytoplasmic vesicle lumen (GO:0060205)	Tot Proteins	0.0003432064781403362	0.0044823386943913	202.12	PGAM1;COTL1;ALDOA
GO_Cellular_Component_2021	intracellular organelle lumen (GO:0070013)	Tot Proteins	0.0003984301061681243	0.0044823386943913	59.3	PGAM1;COTL1;GPC4;ALDOA;PRSS23;CTSB
GO_Cellular_Component_2021	cortical actin cytoskeleton (GO:0030864)	Tot Proteins	0.0011538849900373	0.0103849649103359	306.5	LASP1;COTL1
GO_Cellular_Component_2021	cortical cytoskeleton (GO:0030863)	Tot Proteins	0.0021895208131594	0.0164214060986957	198.04	LASP1;COTL1
GO_Cellular_Component_2021	lysosomal lumen (GO:0043202)	Tot Proteins	0.0047432708947267	0.0252964211641161	115.2	GPC4;CTSB
GO_Cellular_Component_2021	endolysosome lumen (GO:0036021)	Tot Proteins	0.005986138987596	0.0252964211641161	1111.12	CTSB
GO_Cellular_Component_2021	neurofibrillary tangle (GO:0097418)	Tot Proteins	0.005986138987596	0.0252964211641161	1111.12	NEFM
GO_Cellular_Component_2021	actin cytoskeleton (GO:0015629)	Tot Proteins	0.006183569617895	0.0252964211641161	45.64	LASP1;COTL1;ALDOA
GO_Cellular_Component_2021	secretory granule lumen (GO:0034774)	Tot Proteins	0.006183569617895	0.0252964211641161	45.64	PGAM1;COTL1;ALDOA
GO_Cellular_Component_2021	cell cortex region (GO:0099738)	Tot Proteins	0.0131242257813257	0.0492158466799714	376.17	ENO1
GO_Cellular_Component_2021	filopodium membrane (GO:0031527)	Tot Proteins	0.014309122256811	0.0495315770428074	335.13	GAP43
KEGG_2021_Human	Glycolysis / Gluconeogenesis	Tot Proteins	1.4660145190982911e-08	6.45046388403248e-07	1524.67	TPI1;PGAM1;ENO1;ENO2;ALDOA
KEGG_2021_Human	HIF-1 signaling pathway	Tot Proteins	0.00029319598760714423	0.0064503117273571	217.84	ENO1;ENO2;ALDOA
KEGG_2021_Human	Fructose and mannose metabolism	Tot Proteins	0.0007122855268112139	0.0104468543932311	423.88	TPI1;ALDOA
KEGG_2021_Human	Wnt signaling pathway	Tot Proteins	0.0009997567321736792	0.0109973240539104	119.95	SFRP2;WNT8B;GPC4
KEGG_2021_Human	RNA degradation	Tot Proteins	0.0040188558859007	0.0353659317959263	129.61	ENO1;ENO2
GO_Biological_Process_2021	regulation of stem cell division (GO:2000035)	Up-regulated Proteins	0.0023978589692277	0.0473926311581944	3445.29	SFRP2
GO_Biological_Process_2021	aspartate family amino acid biosynthetic process (GO:0009067)	Up-regulated Proteins	0.0023978589692277	0.0473926311581944	3445.29	ASNS
GO_Biological_Process_2021	hematopoietic stem cell proliferation (GO:0071425)	Up-regulated Proteins	0.0032958256764104	0.0473926311581944	2284.21	SFRP2
GO_Biological_Process_2021	somite development (GO:0061053)	Up-regulated Proteins	0.0032958256764104	0.0473926311581944	2284.21	SFRP2
GO_Biological_Process_2021	branching involved in blood vessel morphogenesis (GO:0001569)	Up-regulated Proteins	0.0041931197986946	0.0473926311581944	1682.8	SFRP2
GO_Biological_Process_2021	cardiac left ventricle morphogenesis (GO:0003214)	Up-regulated Proteins	0.0041931197986946	0.0473926311581944	1682.8	SFRP2
GO_Biological_Process_2021	regulation of intrinsic apoptotic signaling pathway in response to DNA damage (GO:1902229)	Up-regulated Proteins	0.0047909422750142	0.0473926311581944	1422.78	SFRP2
GO_Biological_Process_2021	nuclear transport (GO:0051169)	Up-regulated Proteins	0.0047909422750142	0.0473926311581944	1422.78	BANF1
GO_Biological_Process_2021	mesenchyme development (GO:0060485)	Up-regulated Proteins	0.0047909422750142	0.0473926311581944	1422.78	SFRP2
GO_Biological_Process_2021	negative regulation of cell population proliferation (GO:0008285)	Up-regulated Proteins	0.0051080887767998	0.0473926311581944	137.29	SFRP2;FABP7
GO_Biological_Process_2021	positive regulation of cell adhesion mediated by integrin (GO:0033630)	Up-regulated Proteins	0.0053884659389882	0.0473926311581944	1227.64	SFRP2
GO_Biological_Process_2021	aspartate family amino acid metabolic process (GO:0009066)	Up-regulated Proteins	0.0056871157389833	0.0473926311581944	1147.41	ASNS
GO_Biological_Process_2021	triglyceride catabolic process (GO:0019433)	Up-regulated Proteins	0.0068809683244201	0.0476707768535901	904.0	FABP7
GO_Biological_Process_2021	DNA packaging (GO:0006323)	Up-regulated Proteins	0.0071792448741713	0.0476707768535901	857.29	BANF1
GO_Biological_Process_2021	negative regulation of intrinsic apoptotic signaling pathway in response to DNA damage (GO:1902230)	Up-regulated Proteins	0.007775574144635	0.0476707768535901	775.88	SFRP2
GO_Biological_Process_2021	positive regulation of mitotic cell cycle (GO:0045931)	Up-regulated Proteins	0.0080736268908127	0.0476707768535901	740.22	ASNS
GO_Biological_Process_2021	negative regulation of epithelial to mesenchymal transition (GO:0010719)	Up-regulated Proteins	0.0086695086687213	0.0476707768535901	677.12	SFRP2
GO_Biological_Process_2021	negative regulation of response to DNA damage stimulus (GO:2001021)	Up-regulated Proteins	0.0092650922497144	0.0476707768535901	623.08	SFRP2
GO_Biological_Process_2021	negative regulation of peptidyl-tyrosine phosphorylation (GO:0050732)	Up-regulated Proteins	0.0092650922497144	0.0476707768535901	623.08	SFRP2
GO_Biological_Process_2021	regulation of cell adhesion mediated by integrin (GO:0033628)	Up-regulated Proteins	0.0101579087405383	0.0476707768535901	555.22	SFRP2
GO_Biological_Process_2021	acylglycerol catabolic process (GO:0046464)	Up-regulated Proteins	0.0104553652553503	0.0476707768535901	535.47	FABP7
GO_Biological_Process_2021	negative regulation of cellular process (GO:0048523)	Up-regulated Proteins	0.011118805933491	0.0476707768535901	77.5	SFRP2;FABP7
GO_Biological_Process_2021	visual system development (GO:0150063)	Up-regulated Proteins	0.0122385410272356	0.0476707768535901	439.3	SALL2
GO_Biological_Process_2021	cellular response to glucose starvation (GO:0042149)	Up-regulated Proteins	0.0128323377374525	0.0476707768535901	413.84	ASNS
GO_Biological_Process_2021	branching morphogenesis of an epithelial tube (GO:0048754)	Up-regulated Proteins	0.0131291245516557	0.0476707768535901	402.08	SFRP2
GO_Biological_Process_2021	cardiac ventricle morphogenesis (GO:0003208)	Up-regulated Proteins	0.0131291245516557	0.0476707768535901	402.08	SFRP2
GO_Biological_Process_2021	chromosome condensation (GO:0030261)	Up-regulated Proteins	0.0134258370265617	0.0476707768535901	390.89	BANF1
GO_Biological_Process_2021	alpha-amino acid metabolic process (GO:1901605)	Up-regulated Proteins	0.0137224751767354	0.0476707768535901	380.25	ASNS
GO_Biological_Process_2021	positive regulation of fat cell differentiation (GO:0045600)	Up-regulated Proteins	0.0152045515346865	0.0476707768535901	333.96	SFRP2
GO_Biological_Process_2021	mitotic nuclear membrane organization (GO:0101024)	Up-regulated Proteins	0.0152045515346865	0.0476707768535901	333.96	BANF1
GO_Biological_Process_2021	mitotic nuclear membrane reassembly (GO:0007084)	Up-regulated Proteins	0.0152045515346865	0.0476707768535901	333.96	BANF1
GO_Biological_Process_2021	negative regulation of viral genome replication (GO:0045071)	Up-regulated Proteins	0.0160929063554706	0.0476707768535901	310.73	BANF1
GO_Biological_Process_2021	nuclear membrane reassembly (GO:0031468)	Up-regulated Proteins	0.0160929063554706	0.0476707768535901	310.73	BANF1
GO_Biological_Process_2021	triglyceride metabolic process (GO:0006641)	Up-regulated Proteins	0.0163888762191803	0.0476707768535901	303.62	FABP7
GO_Biological_Process_2021	sensory organ development (GO:0007423)	Up-regulated Proteins	0.0166847718987565	0.0476707768535901	296.78	SALL2
GO_Biological_Process_2021	eye development (GO:0001654)	Up-regulated Proteins	0.0172763407705115	0.0479898354736432	283.9	SALL2
GO_Biological_Process_2021	regulation of apoptotic process (GO:0042981)	Up-regulated Proteins	0.0186674873321475	0.0480577228631021	51.79	SFRP2;ASNS
GO_Biological_Process_2021	negative regulation of intrinsic apoptotic signaling pathway (GO:2001243)	Up-regulated Proteins	0.0190492685407353	0.0480577228631021	250.61	SFRP2
GO_Biological_Process_2021	positive regulation of cell cycle (GO:0045787)	Up-regulated Proteins	0.0196396519018298	0.0480577228631021	241.0	ASNS
GO_Biological_Process_2021	regulation of cell population proliferation (GO:0042127)	Up-regulated Proteins	0.0197327610269485	0.0480577228631021	49.54	SFRP2;FABP7
GO_Biological_Process_2021	regulation of viral genome replication (GO:0045069)	Up-regulated Proteins	0.0199347325407437	0.0480577228631021	236.44	BANF1
GO_Biological_Process_2021	canonical Wnt signaling pathway (GO:0060070)	Up-regulated Proteins	0.020229739174506	0.0480577228631021	232.02	SFRP2
GO_Biological_Process_2021	negative regulation of viral process (GO:0048525)	Up-regulated Proteins	0.0208195304784689	0.0480577228631021	223.61	BANF1
GO_Biological_Process_2021	negative regulation of epithelial cell proliferation (GO:0050680)	Up-regulated Proteins	0.0214090259328941	0.0480577228631021	215.73	SFRP2
GO_Biological_Process_2021	regulation of cell division (GO:0051302)	Up-regulated Proteins	0.0225871297456579	0.0480577228631021	201.33	SFRP2
GO_Biological_Process_2021	positive regulation of growth (GO:0045927)	Up-regulated Proteins	0.0225871297456579	0.0480577228631021	201.33	SFRP2
GO_Biological_Process_2021	regulation of epithelial to mesenchymal transition (GO:0010717)	Up-regulated Proteins	0.0225871297456579	0.0480577228631021	201.33	SFRP2
GO_Biological_Process_2021	regulation of fat cell differentiation (GO:0045598)	Up-regulated Proteins	0.0237640515542398	0.0484980643964078	188.54	SFRP2
GO_Biological_Process_2021	positive regulation of cell adhesion (GO:0045785)	Up-regulated Proteins	0.0237640515542398	0.0484980643964078	188.54	SFRP2
GO_Molecular_Function_2021	carbon-nitrogen ligase activity, with glutamine as amido-N-donor (GO:0016884)	Up-regulated Proteins	0.0023978589692277	0.0215807307230497	3445.29	ASNS
KEGG_2021_Human	Alanine, aspartate and glutamate metabolism	Up-regulated Proteins	0.0110500548998867	0.032997338469994	499.54	ASNS
KEGG_2021_Human	PPAR signaling pathway	Up-regulated Proteins	0.0219982256466627	0.032997338469994	208.31	FABP7
KEGG_2021_Human	Wnt signaling pathway	Up-regulated Proteins	0.0487837527270572	0.0487837527270572	72.59	SFRP2
GO_Biological_Process_2021	nuclear transport (GO:0051169)	Up-regulated Core Proteins	0.0007999806025552998	0.0034713706665295	142504.37	BANF1
GO_Biological_Process_2021	DNA packaging (GO:0006323)	Up-regulated Core Proteins	0.0011999741185782	0.0034713706665295	134347.69	BANF1
GO_Biological_Process_2021	chromosome condensation (GO:0030261)	Up-regulated Core Proteins	0.0022499601197094	0.0034713706665295	121662.5	BANF1
GO_Biological_Process_2021	mitotic nuclear membrane organization (GO:0101024)	Up-regulated Core Proteins	0.0025499566390179	0.0034713706665295	119129.02	BANF1
GO_Biological_Process_2021	mitotic nuclear membrane reassembly (GO:0007084)	Up-regulated Core Proteins	0.0025499566390179	0.0034713706665295	119129.02	BANF1
GO_Biological_Process_2021	negative regulation of viral genome replication (GO:0045071)	Up-regulated Core Proteins	0.0026999549628563	0.0034713706665295	117971.02	BANF1
GO_Biological_Process_2021	nuclear membrane reassembly (GO:0031468)	Up-regulated Core Proteins	0.0026999549628563	0.0034713706665295	117971.02	BANF1
GO_Biological_Process_2021	regulation of viral genome replication (GO:0045069)	Up-regulated Core Proteins	0.0033499481224912	0.0034999466296654	113594.39	BANF1
GO_Biological_Process_2021	negative regulation of viral process (GO:0048525)	Up-regulated Core Proteins	0.0034999466296654	0.0034999466296654	112704.3	BANF1
GO_Molecular_Function_2021	protein homodimerization activity (GO:0042803)	Up-regulated Core Proteins	0.0317998196952851	0.0405498013581075	66772.78	BANF1
GO_Molecular_Function_2021	DNA binding (GO:0003677)	Up-regulated Core Proteins	0.0405498013581075	0.0405498013581075	61505.05	BANF1
GO_Biological_Process_2021	canonical glycolysis (GO:0061621)	Down-regulated Proteins	1.3519317553968878e-11	8.839139399989753e-10	10113.6	TPI1;PGAM1;ENO1;ENO2;ALDOA
GO_Biological_Process_2021	glucose catabolic process to pyruvate (GO:0061718)	Down-regulated Proteins	1.3519317553968878e-11	8.839139399989753e-10	10113.6	TPI1;PGAM1;ENO1;ENO2;ALDOA
GO_Biological_Process_2021	glycolytic process through glucose-6-phosphate (GO:0061620)	Down-regulated Proteins	1.6890075286604625e-11	8.839139399989753e-10	9521.99	TPI1;PGAM1;ENO1;ENO2;ALDOA
GO_Biological_Process_2021	glycolytic process (GO:0006096)	Down-regulated Proteins	3.7671224937835645e-11	1.478595578810049e-09	7676.83	TPI1;PGAM1;ENO1;ENO2;ALDOA
GO_Biological_Process_2021	carbohydrate catabolic process (GO:0016052)	Down-regulated Proteins	2.361898295810774e-10	6.180300540704858e-09	4723.62	TPI1;PGAM1;ENO1;ENO2;ALDOA
GO_Biological_Process_2021	gluconeogenesis (GO:0006094)	Down-regulated Proteins	2.361898295810774e-10	6.180300540704858e-09	4723.62	TPI1;PGAM1;ENO1;ENO2;ALDOA
GO_Biological_Process_2021	hexose biosynthetic process (GO:0019319)	Down-regulated Proteins	3.4172615940299234e-10	7.6644295751814e-09	4286.96	TPI1;PGAM1;ENO1;ENO2;ALDOA
GO_Biological_Process_2021	pyruvate metabolic process (GO:0006090)	Down-regulated Proteins	1.0881475532317732e-09	2.1354895732173557e-08	3164.4	TPI1;PGAM1;ENO1;ENO2;ALDOA
GO_Biological_Process_2021	glucose metabolic process (GO:0006006)	Down-regulated Proteins	2.016461584629105e-09	3.517605208741882e-08	2691.88	TPI1;PGAM1;ENO1;ENO2;ALDOA
GO_Biological_Process_2021	synaptic membrane adhesion (GO:0099560)	Down-regulated Proteins	6.917121064943945e-05	0.0010859880071961	1992.62	GPC4;PTPRF
GO_Biological_Process_2021	regulation of vacuole organization (GO:0044088)	Down-regulated Proteins	0.00017484233445803956	0.0024954769554465	1079.4	ENO1;ENO2
GO_Biological_Process_2021	regulation of protein polymerization (GO:0032271)	Down-regulated Proteins	0.0004472442885735218	0.0058514461088369	582.78	TPPP3;COTL1
GO_Biological_Process_2021	regulation of filopodium assembly (GO:0051489)	Down-regulated Proteins	0.0006144037622474869	0.007420106974835	472.68	RALA;GAP43
GO_Biological_Process_2021	substantia nigra development (GO:0021762)	Down-regulated Proteins	0.0006758731147824064	0.0075375361220073	443.78	CKB;NDRG2
GO_Biological_Process_2021	neutrophil degranulation (GO:0043312)	Down-regulated Proteins	0.0007732479841556616	0.0075375361220073	83.71	PGAM1;COTL1;ALDOA;CTSB
GO_Biological_Process_2021	neutrophil activation involved in immune response (GO:0002283)	Down-regulated Proteins	0.0007975705608358262	0.0075375361220073	82.64	PGAM1;COTL1;ALDOA;CTSB
GO_Biological_Process_2021	neutrophil mediated immunity (GO:0002446)	Down-regulated Proteins	0.0008161663316823287	0.0075375361220073	81.85	PGAM1;COTL1;ALDOA;CTSB
GO_Biological_Process_2021	Wnt signaling pathway (GO:0016055)	Down-regulated Proteins	0.0030524520685432	0.0266241652645164	160.01	WNT8B;GPC4
GO_Biological_Process_2021	determination of dorsal/ventral asymmetry (GO:0048262)	Down-regulated Proteins	0.0044922927083929	0.0352346003758256	1588.07	WNT8B
GO_Biological_Process_2021	axon choice point recognition (GO:0016198)	Down-regulated Proteins	0.0044922927083929	0.0352346003758256	1588.07	GAP43
GO_Biological_Process_2021	positive regulation of plasminogen activation (GO:0010756)	Down-regulated Proteins	0.0053884659389882	0.0352346003758256	1227.64	ENO1
GO_Biological_Process_2021	negative regulation of cellular response to hypoxia (GO:1900038)	Down-regulated Proteins	0.0053884659389882	0.0352346003758256	1227.64	ENO1
GO_Biological_Process_2021	transmembrane receptor protein tyrosine phosphatase signaling pathway (GO:0007185)	Down-regulated Proteins	0.0053884659389882	0.0352346003758256	1227.64	PTPRF
GO_Biological_Process_2021	synapse organization (GO:0050808)	Down-regulated Proteins	0.0056396048458236	0.0352346003758256	103.65	GPC4;PTPRF
GO_Biological_Process_2021	aldehyde biosynthetic process (GO:0046184)	Down-regulated Proteins	0.0062838777740325	0.0352346003758256	992.88	TPI1
GO_Biological_Process_2021	intermediate filament bundle assembly (GO:0045110)	Down-regulated Proteins	0.0062838777740325	0.0352346003758256	992.88	NEFM
GO_Biological_Process_2021	creatine metabolic process (GO:0006600)	Down-regulated Proteins	0.0062838777740325	0.0352346003758256	992.88	CKB
GO_Biological_Process_2021	glyceraldehyde-3-phosphate metabolic process (GO:0019682)	Down-regulated Proteins	0.0062838777740325	0.0352346003758256	992.88	TPI1
GO_Biological_Process_2021	fructose metabolic process (GO:0006000)	Down-regulated Proteins	0.0071785287204102	0.0370418780172509	828.65	ALDOA
GO_Biological_Process_2021	positive regulation of muscle contraction (GO:0045933)	Down-regulated Proteins	0.0071785287204102	0.0370418780172509	828.65	ENO1
GO_Biological_Process_2021	ketone biosynthetic process (GO:0042181)	Down-regulated Proteins	0.0080724193100501	0.0370418780172509	707.8	TPI1
GO_Biological_Process_2021	positive regulation of ATP biosynthetic process (GO:2001171)	Down-regulated Proteins	0.0080724193100501	0.0370418780172509	707.8	ENO1
GO_Biological_Process_2021	fructose 1,6-bisphosphate metabolic process (GO:0030388)	Down-regulated Proteins	0.0080724193100501	0.0370418780172509	707.8	ALDOA
GO_Biological_Process_2021	axon regeneration (GO:0031103)	Down-regulated Proteins	0.0080724193100501	0.0370418780172509	707.8	GAP43
GO_Biological_Process_2021	regulation of receptor binding (GO:1900120)	Down-regulated Proteins	0.0089655500933473	0.0370418780172509	615.43	PTPRF
GO_Biological_Process_2021	modulation by symbiont of host process (GO:0044003)	Down-regulated Proteins	0.0089655500933473	0.0370418780172509	615.43	ENO1
GO_Biological_Process_2021	neuron projection regeneration (GO:0031102)	Down-regulated Proteins	0.0089655500933473	0.0370418780172509	615.43	GAP43
GO_Biological_Process_2021	negative regulation of receptor binding (GO:1900121)	Down-regulated Proteins	0.0089655500933473	0.0370418780172509	615.43	PTPRF
GO_Biological_Process_2021	protein kinase C-activating G protein-coupled receptor signaling pathway (GO:0007205)	Down-regulated Proteins	0.0098579216348164	0.0384831461949395	542.71	GAP43
GO_Biological_Process_2021	glycerol metabolic process (GO:0006071)	Down-regulated Proteins	0.0098579216348164	0.0384831461949395	542.71	TPI1
GO_Biological_Process_2021	cell-cell adhesion via plasma-membrane adhesion molecules (GO:0098742)	Down-regulated Proteins	0.0100497388152389	0.0384831461949395	67.82	GPC4;PTPRF
GO_Biological_Process_2021	cellular response to thyroid hormone stimulus (GO:0097067)	Down-regulated Proteins	0.0107495345067081	0.0392483004082135	484.1	CTSB
GO_Biological_Process_2021	regulation of plasminogen activation (GO:0010755)	Down-regulated Proteins	0.0107495345067081	0.0392483004082135	484.1	ENO1
GO_Biological_Process_2021	response to thyroid hormone (GO:0097066)	Down-regulated Proteins	0.011640389286531	0.0397291547388125	435.94	CTSB
GO_Biological_Process_2021	positive regulation of purine nucleotide biosynthetic process (GO:1900373)	Down-regulated Proteins	0.011640389286531	0.0397291547388125	435.94	ENO1
GO_Biological_Process_2021	protein localization to mitochondrion (GO:0070585)	Down-regulated Proteins	0.011640389286531	0.0397291547388125	435.94	RALA
GO_Biological_Process_2021	regulation of phosphate metabolic process (GO:0019220)	Down-regulated Proteins	0.0143084109196949	0.046800427383169	332.54	PGAM1
GO_Biological_Process_2021	regulation of ATP biosynthetic process (GO:2001169)	Down-regulated Proteins	0.0143084109196949	0.046800427383169	332.54	ENO1
GO_Biological_Process_2021	response to axon injury (GO:0048678)	Down-regulated Proteins	0.0160833123117468	0.0495113731949852	285.31	GAP43
GO_Biological_Process_2021	regulation of presynapse assembly (GO:1905606)	Down-regulated Proteins	0.0160833123117468	0.0495113731949852	285.31	GPC4
GO_Biological_Process_2021	regulation of presynapse organization (GO:0099174)	Down-regulated Proteins	0.0160833123117468	0.0495113731949852	285.31	GPC4
GO_Molecular_Function_2021	hydro-lyase activity (GO:0016836)	Down-regulated Proteins	0.0011044055879804	0.0253763853756396	320.01	ENO1;ENO2
GO_Molecular_Function_2021	ubiquitin protein ligase binding (GO:0031625)	Down-regulated Proteins	0.0016196298657178	0.0253763853756396	96.73	RALA;TPI1;CKB
GO_Molecular_Function_2021	ubiquitin-like protein ligase binding (GO:0044389)	Down-regulated Proteins	0.001934496751292	0.0253763853756396	88.25	RALA;TPI1;CKB
GO_Molecular_Function_2021	tubulin binding (GO:0015631)	Down-regulated Proteins	0.0024632179129385	0.0253763853756396	77.76	TPPP3;NEFM;ALDOA
GO_Molecular_Function_2021	cadherin binding (GO:0045296)	Down-regulated Proteins	0.002819598375071	0.0253763853756396	72.38	LASP1;ENO1;ALDOA
GO_Molecular_Function_2021	phosphotransferase activity, nitrogenous group as acceptor (GO:0016775)	Down-regulated Proteins	0.0044922927083929	0.0269194827015382	1588.07	CKB
GO_Molecular_Function_2021	creatine kinase activity (GO:0004111)	Down-regulated Proteins	0.0044922927083929	0.0269194827015382	1588.07	CKB
GO_Molecular_Function_2021	coreceptor activity involved in Wnt signaling pathway, planar cell polarity pathway (GO:1904929)	Down-regulated Proteins	0.0053884659389882	0.0269194827015382	1227.64	GPC4
GO_Molecular_Function_2021	fructose binding (GO:0070061)	Down-regulated Proteins	0.0053884659389882	0.0269194827015382	1227.64	ALDOA
GO_Molecular_Function_2021	aldehyde-lyase activity (GO:0016832)	Down-regulated Proteins	0.0071785287204102	0.0269194827015382	828.65	ALDOA
GO_Molecular_Function_2021	coreceptor activity involved in Wnt signaling pathway (GO:0071936)	Down-regulated Proteins	0.0071785287204102	0.0269194827015382	828.65	GPC4
GO_Molecular_Function_2021	intramolecular oxidoreductase activity, interconverting aldoses and ketoses (GO:0016861)	Down-regulated Proteins	0.0071785287204102	0.0269194827015382	828.65	TPI1
GO_Molecular_Function_2021	intramolecular transferase activity, phosphotransferases (GO:0016868)	Down-regulated Proteins	0.0080724193100501	0.0279429899194043	707.8	PGAM1
GO_Molecular_Function_2021	actin binding (GO:0003779)	Down-regulated Proteins	0.0108565477915066	0.0348960464726999	63.99	COTL1;ALDOA
GO_Molecular_Function_2021	transmembrane receptor protein phosphatase activity (GO:0019198)	Down-regulated Proteins	0.0143084109196949	0.0402424057116421	332.54	PTPRF
GO_Molecular_Function_2021	transmembrane receptor protein tyrosine phosphatase activity (GO:0005001)	Down-regulated Proteins	0.0143084109196949	0.0402424057116421	332.54	PTPRF
GO_Cellular_Component_2021	ficolin-1-rich granule lumen (GO:1904813)	Down-regulated Proteins	3.898920372597916e-06	0.0001715524963943083	593.97	PGAM1;COTL1;ALDOA;CTSB
GO_Cellular_Component_2021	ficolin-1-rich granule (GO:0101002)	Down-regulated Proteins	1.918036333207391e-05	0.000421967993305626	341.4	PGAM1;COTL1;ALDOA;CTSB
GO_Cellular_Component_2021	cytoplasmic vesicle lumen (GO:0060205)	Down-regulated Proteins	0.00014189076431477682	0.0020810645432833	314.39	PGAM1;COTL1;ALDOA
GO_Cellular_Component_2021	cortical actin cytoskeleton (GO:0030864)	Down-regulated Proteins	0.000644780459847493	0.0064358299430061	457.83	LASP1;COTL1
GO_Cellular_Component_2021	intracellular organelle lumen (GO:0070013)	Down-regulated Proteins	0.0007313443117052405	0.0064358299430061	63.05	PGAM1;COTL1;GPC4;ALDOA;CTSB
GO_Cellular_Component_2021	cortical cytoskeleton (GO:0030863)	Down-regulated Proteins	0.0012273862947571	0.0090008328282192	298.13	LASP1;COTL1
GO_Cellular_Component_2021	actin cytoskeleton (GO:0015629)	Down-regulated Proteins	0.0026734396405693	0.0130717436548312	74.46	LASP1;COTL1;ALDOA
GO_Cellular_Component_2021	secretory granule lumen (GO:0034774)	Down-regulated Proteins	0.0026734396405693	0.0130717436548312	74.46	PGAM1;COTL1;ALDOA
GO_Cellular_Component_2021	lysosomal lumen (GO:0043202)	Down-regulated Proteins	0.0026737657475791	0.0130717436548312	175.42	GPC4;CTSB
GO_Cellular_Component_2021	endolysosome lumen (GO:0036021)	Down-regulated Proteins	0.0044922927083929	0.0179691708335718	1588.07	CTSB
GO_Cellular_Component_2021	neurofibrillary tangle (GO:0097418)	Down-regulated Proteins	0.0044922927083929	0.0179691708335718	1588.07	NEFM
GO_Cellular_Component_2021	cell cortex region (GO:0099738)	Down-regulated Proteins	0.0098579216348164	0.0361457126609938	542.71	ENO1
GO_Cellular_Component_2021	filopodium membrane (GO:0031527)	Down-regulated Proteins	0.0107495345067081	0.0363830398688584	484.1	GAP43
KEGG_2021_Human	Glycolysis / Gluconeogenesis	Down-regulated Proteins	3.0013338921930603e-09	1.2605602347210853e-07	2425.03	TPI1;PGAM1;ENO1;ENO2;ALDOA
KEGG_2021_Human	HIF-1 signaling pathway	Down-regulated Proteins	0.0001210523267137453	0.0025420988609886	338.24	ENO1;ENO2;ALDOA
KEGG_2021_Human	Fructose and mannose metabolism	Down-regulated Proteins	0.0003973053137316762	0.0055622743922434	629.97	TPI1;ALDOA
KEGG_2021_Human	RNA degradation	Down-regulated Proteins	0.0022622747962299	0.0237538853604147	196.83	ENO1;ENO2
GO_Biological_Process_2021	canonical glycolysis (GO:0061621)	Down-regulated Core Proteins	9.555856473097774e-15	2.627768902643298e-13	169690.9	TPI1;PGAM1;ENO1;ENO2;ALDOA
GO_Biological_Process_2021	glucose catabolic process to pyruvate (GO:0061718)	Down-regulated Core Proteins	9.555856473097774e-15	2.627768902643298e-13	169690.9	TPI1;PGAM1;ENO1;ENO2;ALDOA
GO_Biological_Process_2021	glycolytic process through glucose-6-phosphate (GO:0061620)	Down-regulated Core Proteins	1.1944404102924083e-14	2.627768902643298e-13	160084.19	TPI1;PGAM1;ENO1;ENO2;ALDOA
GO_Biological_Process_2021	glycolytic process (GO:0006096)	Down-regulated Core Proteins	2.6694061041353785e-14	4.404520071823374e-13	130031.06	TPI1;PGAM1;ENO1;ENO2;ALDOA
GO_Biological_Process_2021	carbohydrate catabolic process (GO:0016052)	Down-regulated Core Proteins	1.683762877119859e-13	1.8521391648318445e-12	81530.02	TPI1;PGAM1;ENO1;ENO2;ALDOA
GO_Biological_Process_2021	gluconeogenesis (GO:0006094)	Down-regulated Core Proteins	1.683762877119859e-13	1.8521391648318445e-12	81530.02	TPI1;PGAM1;ENO1;ENO2;ALDOA
GO_Biological_Process_2021	hexose biosynthetic process (GO:0019319)	Down-regulated Core Proteins	2.439784830439745e-13	2.3003685544146167e-12	74298.34	TPI1;PGAM1;ENO1;ENO2;ALDOA
GO_Biological_Process_2021	pyruvate metabolic process (GO:0006090)	Down-regulated Core Proteins	7.811911828812749e-13	6.444827258770518e-12	55599.8	TPI1;PGAM1;ENO1;ENO2;ALDOA
GO_Biological_Process_2021	glucose metabolic process (GO:0006006)	Down-regulated Core Proteins	1.452728206228454e-12	1.065334017900866e-11	47669.68	TPI1;PGAM1;ENO1;ENO2;ALDOA
GO_Biological_Process_2021	regulation of vacuole organization (GO:0044088)	Down-regulated Core Proteins	1.7278715595310902e-05	0.00011403952292905196	5475.89	ENO1;ENO2
GO_Biological_Process_2021	positive regulation of plasminogen activation (GO:0010756)	Down-regulated Core Proteins	0.0017988408901478	0.0089009445885167	5053.71	ENO1
GO_Biological_Process_2021	negative regulation of cellular response to hypoxia (GO:1900038)	Down-regulated Core Proteins	0.0017988408901478	0.0089009445885167	5053.71	ENO1
GO_Biological_Process_2021	aldehyde biosynthetic process (GO:0046184)	Down-regulated Core Proteins	0.0020983872819732	0.0089009445885167	4108.59	TPI1
GO_Biological_Process_2021	creatine metabolic process (GO:0006600)	Down-regulated Core Proteins	0.0020983872819732	0.0089009445885167	4108.59	CKB
GO_Biological_Process_2021	glyceraldehyde-3-phosphate metabolic process (GO:0019682)	Down-regulated Core Proteins	0.0020983872819732	0.0089009445885167	4108.59	TPI1
GO_Biological_Process_2021	fructose metabolic process (GO:0006000)	Down-regulated Core Proteins	0.0023978589692277	0.0089009445885167	3445.29	ALDOA
GO_Biological_Process_2021	positive regulation of muscle contraction (GO:0045933)	Down-regulated Core Proteins	0.0023978589692277	0.0089009445885167	3445.29	ENO1
GO_Biological_Process_2021	fructose 1,6-bisphosphate metabolic process (GO:0030388)	Down-regulated Core Proteins	0.0026972559359141	0.0089009445885167	2955.69	ALDOA
GO_Biological_Process_2021	ketone biosynthetic process (GO:0042181)	Down-regulated Core Proteins	0.0026972559359141	0.0089009445885167	2955.69	TPI1
GO_Biological_Process_2021	positive regulation of ATP biosynthetic process (GO:2001171)	Down-regulated Core Proteins	0.0026972559359141	0.0089009445885167	2955.69	ENO1
GO_Biological_Process_2021	modulation by symbiont of host process (GO:0044003)	Down-regulated Core Proteins	0.0029965781728721	0.009417817114741	2580.41	ENO1
GO_Biological_Process_2021	glycerol metabolic process (GO:0006071)	Down-regulated Core Proteins	0.0032958256764104	0.0098874770292313	2284.21	TPI1
GO_Biological_Process_2021	regulation of plasminogen activation (GO:0010755)	Down-regulated Core Proteins	0.0035949984464796	0.0103160824985937	2044.88	ENO1
GO_Biological_Process_2021	positive regulation of purine nucleotide biosynthetic process (GO:1900373)	Down-regulated Core Proteins	0.0038940964853966	0.0107087653348408	1847.77	ENO1
GO_Biological_Process_2021	regulation of phosphate metabolic process (GO:0019220)	Down-regulated Core Proteins	0.0047909422750142	0.0121616226981131	1422.78	PGAM1
GO_Biological_Process_2021	regulation of ATP biosynthetic process (GO:2001169)	Down-regulated Core Proteins	0.0047909422750142	0.0121616226981131	1422.78	ENO1
GO_Biological_Process_2021	positive regulation of protein processing (GO:0010954)	Down-regulated Core Proteins	0.0059856908667451	0.014631688785377	1076.21	ENO1
GO_Biological_Process_2021	neutrophil degranulation (GO:0043312)	Down-regulated Core Proteins	0.0081199794793194	0.0172664354386964	98.05	PGAM1;ALDOA
GO_Biological_Process_2021	neutrophil activation involved in immune response (GO:0002283)	Down-regulated Core Proteins	0.0082512886584652	0.0172664354386964	96.9	PGAM1;ALDOA
GO_Biological_Process_2021	neutrophil mediated immunity (GO:0002446)	Down-regulated Core Proteins	0.0083504138047682	0.0172664354386964	96.04	PGAM1;ALDOA
GO_Biological_Process_2021	regulation of muscle contraction (GO:0006937)	Down-regulated Core Proteins	0.0083716050611861	0.0172664354386964	707.41	ENO1
GO_Biological_Process_2021	carbohydrate derivative biosynthetic process (GO:1901137)	Down-regulated Core Proteins	0.0083716050611861	0.0172664354386964	707.41	TPI1
GO_Biological_Process_2021	regulation of cellular amide metabolic process (GO:0034248)	Down-regulated Core Proteins	0.0095627722512654	0.0191255445025309	598.87	PGAM1
GO_Biological_Process_2021	positive regulation of ATP metabolic process (GO:1903580)	Down-regulated Core Proteins	0.0098603777426936	0.0191407332652288	576.31	ENO1
GO_Biological_Process_2021	organophosphate biosynthetic process (GO:0090407)	Down-regulated Core Proteins	0.0116444467860795	0.0217162638633812	467.7	TPI1
GO_Biological_Process_2021	hexose metabolic process (GO:0019318)	Down-regulated Core Proteins	0.0122385410272356	0.0217162638633812	439.3	ALDOA
GO_Biological_Process_2021	regulation of carbohydrate catabolic process (GO:0043470)	Down-regulated Core Proteins	0.0128323377374525	0.0217162638633812	413.84	PGAM1
GO_Biological_Process_2021	regulation of purine nucleotide metabolic process (GO:1900542)	Down-regulated Core Proteins	0.0128323377374525	0.0217162638633812	413.84	PGAM1
GO_Biological_Process_2021	substantia nigra development (GO:0021762)	Down-regulated Core Proteins	0.0128323377374525	0.0217162638633812	413.84	CKB
GO_Biological_Process_2021	regulation of generation of precursor metabolites and energy (GO:0043467)	Down-regulated Core Proteins	0.0149082847993736	0.0245986699189664	342.39	PGAM1
GO_Biological_Process_2021	protein homotetramerization (GO:0051289)	Down-regulated Core Proteins	0.0155007440273006	0.024952417214679	325.88	ALDOA
GO_Biological_Process_2021	striated muscle contraction (GO:0006941)	Down-regulated Core Proteins	0.0160929063554706	0.025288852844311	310.73	ALDOA
GO_Biological_Process_2021	regulation of ATP metabolic process (GO:1903578)	Down-regulated Core Proteins	0.0166847718987565	0.0256091847748356	296.78	PGAM1
GO_Biological_Process_2021	negative regulation of intrinsic apoptotic signaling pathway (GO:2001243)	Down-regulated Core Proteins	0.0190492685407353	0.0285739028111029	250.61	ENO1
GO_Biological_Process_2021	protein tetramerization (GO:0051262)	Down-regulated Core Proteins	0.0211143151809354	0.0302944522161247	219.61	ALDOA
GO_Biological_Process_2021	regulation of glycolytic process (GO:0006110)	Down-regulated Core Proteins	0.0211143151809354	0.0302944522161247	219.61	PGAM1
GO_Biological_Process_2021	protein homooligomerization (GO:0051260)	Down-regulated Core Proteins	0.0357595712725531	0.048159293578845	110.33	ALDOA
GO_Biological_Process_2021	regulation of phosphorylation (GO:0042325)	Down-regulated Core Proteins	0.0369232602647567	0.048159293578845	105.72	PGAM1
GO_Biological_Process_2021	platelet degranulation (GO:0002576)	Down-regulated Core Proteins	0.0369232602647567	0.048159293578845	105.72	ALDOA
GO_Biological_Process_2021	negative regulation of cell growth (GO:0030308)	Down-regulated Core Proteins	0.0372139995836529	0.048159293578845	104.62	ENO1
GO_Biological_Process_2021	negative regulation of growth (GO:0045926)	Down-regulated Core Proteins	0.0372139995836529	0.048159293578845	104.62	ENO1
GO_Biological_Process_2021	muscle contraction (GO:0006936)	Down-regulated Core Proteins	0.0380857787516059	0.0483396422616536	101.44	ALDOA
GO_Molecular_Function_2021	hydro-lyase activity (GO:0016836)	Down-regulated Core Proteins	0.00011059129575543732	0.0023224172108641	1713.74	ENO1;ENO2
GO_Molecular_Function_2021	creatine kinase activity (GO:0004111)	Down-regulated Core Proteins	0.0014992198216206	0.0066790455559016	6499.56	CKB
GO_Molecular_Function_2021	phosphotransferase activity, nitrogenous group as acceptor (GO:0016775)	Down-regulated Core Proteins	0.0014992198216206	0.0066790455559016	6499.56	CKB
GO_Molecular_Function_2021	fructose binding (GO:0070061)	Down-regulated Core Proteins	0.0017988408901478	0.0066790455559016	5053.71	ALDOA
GO_Molecular_Function_2021	aldehyde-lyase activity (GO:0016832)	Down-regulated Core Proteins	0.0023978589692277	0.0066790455559016	3445.29	ALDOA
GO_Molecular_Function_2021	intramolecular oxidoreductase activity, interconverting aldoses and ketoses (GO:0016861)	Down-regulated Core Proteins	0.0023978589692277	0.0066790455559016	3445.29	TPI1
GO_Molecular_Function_2021	ubiquitin protein ligase binding (GO:0031625)	Down-regulated Core Proteins	0.0025329219585748	0.0066790455559016	224.26	TPI1;CKB
GO_Molecular_Function_2021	intramolecular transferase activity, phosphotransferases (GO:0016868)	Down-regulated Core Proteins	0.0026972559359141	0.0066790455559016	2955.69	PGAM1
GO_Molecular_Function_2021	ubiquitin-like protein ligase binding (GO:0044389)	Down-regulated Core Proteins	0.0028624480953864	0.0066790455559016	206.15	TPI1;CKB
GO_Molecular_Function_2021	cadherin binding (GO:0045296)	Down-regulated Core Proteins	0.0037137499991159	0.0077988749981434	172.02	ENO1;ALDOA
GO_Molecular_Function_2021	protein homodimerization activity (GO:0042803)	Down-regulated Core Proteins	0.0139097788487589	0.0265550323476306	65.27	TPI1;ENO1
GO_Cellular_Component_2021	cytoplasmic vesicle lumen (GO:0060205)	Down-regulated Core Proteins	0.00048427420894458297	0.003876034157852	671.46	PGAM1;ALDOA
GO_Cellular_Component_2021	ficolin-1-rich granule lumen (GO:1904813)	Down-regulated Core Proteins	0.000553719165407441	0.003876034157852	615.8	PGAM1;ALDOA
GO_Cellular_Component_2021	ficolin-1-rich granule (GO:0101002)	Down-regulated Core Proteins	0.0012324005530949	0.0057512025811097	364.61	PGAM1;ALDOA
GO_Cellular_Component_2021	cell cortex region (GO:0099738)	Down-regulated Core Proteins	0.0032958256764104	0.010022062852861	2284.21	ENO1
GO_Cellular_Component_2021	secretory granule lumen (GO:0034774)	Down-regulated Core Proteins	0.003579308161736	0.010022062852861	176.51	PGAM1;ALDOA
GO_Cellular_Component_2021	tertiary granule lumen (GO:1904724)	Down-regulated Core Proteins	0.0163888762191803	0.0382407111780876	303.62	ALDOA
GO_Cellular_Component_2021	platelet alpha granule lumen (GO:0031093)	Down-regulated Core Proteins	0.0199347325407437	0.0398694650814875	236.44	ALDOA
GO_Cellular_Component_2021	intracellular organelle lumen (GO:0070013)	Down-regulated Core Proteins	0.0240383136856379	0.0415351859511937	42.19	PGAM1;ALDOA
GO_Cellular_Component_2021	platelet alpha granule (GO:0031091)	Down-regulated Core Proteins	0.0267011909686245	0.0415351859511937	162.06	ALDOA
KEGG_2021_Human	Glycolysis / Gluconeogenesis	Down-regulated Core Proteins	2.167693938949778e-12	2.167693938949778e-11	43171.04	TPI1;PGAM1;ENO1;ENO2;ALDOA
KEGG_2021_Human	HIF-1 signaling pathway	Down-regulated Core Proteins	3.1118370051671004e-06	1.55591850258355e-05	2379.11	ENO1;ENO2;ALDOA
KEGG_2021_Human	Fructose and mannose metabolism	Down-regulated Core Proteins	3.9436610600764144e-05	0.00013145536866921383	3265.18	TPI1;ALDOA
KEGG_2021_Human	RNA degradation	Down-regulated Core Proteins	0.0002287162138674749	0.0005717905346686872	1084.19	ENO1;ENO2
KEGG_2021_Human	Pentose phosphate pathway	Down-regulated Core Proteins	0.008967337727522	0.0179346754550441	649.09	ALDOA
KEGG_2021_Human	Glycine, serine and threonine metabolism	Down-regulated Core Proteins	0.0119415311049953	0.0199025518416589	453.1	PGAM1
KEGG_2021_Human	Arginine and proline metabolism	Down-regulated Core Proteins	0.0149082847993736	0.0212975497133909	342.39	CKB
KEGG_2021_Human	Central carbon metabolism in cancer	Down-regulated Core Proteins	0.0208195304784689	0.0241151808305157	223.61	PGAM1
KEGG_2021_Human	Inositol phosphate metabolism	Down-regulated Core Proteins	0.0217036627474641	0.0241151808305157	211.96	TPI1
KEGG_2021_Human	Glucagon signaling pathway	Down-regulated Core Proteins	0.0316774286006728	0.0316774286006728	129.54	PGAM1

## Sheet: Suppl table S7E
Supplementary Table S7E: Genetic overlap between group of proteins of interest and diseases calculated by a Fisher's exact test + Benjamini Hochberg correction for multiple comparisons. 0.1uM BPA = Medium BPA concentrations, 1uM BPA = High BPA concentrations
Condition	Disease Name	FDR
Down-regulated Proteins at Medium BPA concentrations	Enzymopathy	0.005362350296493725
Down-regulated Proteins at Medium BPA concentrations	Undifferentiated carcinoma	0.005905771710902451
Down-regulated Proteins at Medium BPA concentrations	Carcinomatosis	0.00590577
Down-regulated Proteins at Medium BPA concentrations	Mammary Carcinoma, Animal	0.005905771710902451
Down-regulated Proteins at Medium BPA concentrations	Anaplastic carcinoma	0.005905771710902451
Down-regulated Proteins at Medium BPA concentrations	Carcinoma, Spindle-Cell	0.005905771710902451
Down-regulated Proteins at Medium BPA concentrations	Animal Mammary Neoplasms	0.005905771710902451
Down-regulated Proteins at Medium BPA concentrations	Acute schizophrenia	0.008880782445258355
Down-regulated Core Proteins at Medium BPA concentrations	Enzymopathy	0.00019755455346686504
Down-regulated Core Proteins at Medium BPA concentrations	Undifferentiated carcinoma	0.0014819542549875536
Down-regulated Core Proteins at Medium BPA concentrations	Carcinomatosis	0.0014819542549875536
Down-regulated Core Proteins at Medium BPA concentrations	Mammary Carcinoma, Animal	0.0014819542549875536
Down-regulated Core Proteins at Medium BPA concentrations	Anaplastic carcinoma	0.0014819542549875536
Down-regulated Core Proteins at Medium BPA concentrations	Carcinoma, Spindle-Cell	0.0014819542549875536
Down-regulated Core Proteins at Medium BPA concentrations	Acute schizophrenia	0.0014819542549875536
Down-regulated Core Proteins at Medium BPA concentrations	Animal Mammary Neoplasms	0.0014819542549875536
Down-regulated Proteins at High BPA concentrations	Enzymopathy	0.01870735307929644
Down-regulated Core Proteins at High BPA concentrations	Enzymopathy	0.0011169783020108777
Down-regulated Core Proteins at High BPA concentrations	Acute schizophrenia	0.012785795169647755
Down-regulated Core Proteins at High BPA concentrations	Undifferentiated carcinoma	0.016022868310680723
Down-regulated Core Proteins at High BPA concentrations	Carcinomatosis	0.016022868310680723
Down-regulated Core Proteins at High BPA concentrations	Mammary Carcinoma, Animal	0.016022868310680723
Down-regulated Core Proteins at High BPA concentrations	Anaplastic carcinoma	0.016022868310680723
Down-regulated Core Proteins at High BPA concentrations	Carcinoma, Spindle-Cell	0.016022868310680723
Down-regulated Core Proteins at High BPA concentrations	Animal Mammary Neoplasms	0.016022868310680723
Total Dysregulated Proteins at Medium BPA concentrations	Undifferentiated carcinoma	0.0015097186842769144
Total Dysregulated Proteins at Medium BPA concentrations	Carcinomatosis	0.0015097186842769144
Total Dysregulated Proteins at Medium BPA concentrations	Mammary Carcinoma, Animal	0.0015097186842769144
Total Dysregulated Proteins at Medium BPA concentrations	Anaplastic carcinoma	0.0015097186842769144
Total Dysregulated Proteins at Medium BPA concentrations	Carcinoma, Spindle-Cell	0.0015097186842769144
Total Dysregulated Proteins at Medium BPA concentrations	Animal Mammary Neoplasms	0.0015097186842769144
Total Dysregulated Proteins at Medium BPA concentrations	Enzymopathy	0.00196636
Total Dysregulated Proteins at Medium BPA concentrations	Acute schizophrenia	0.016510517596347824
Total Dysregulated Proteins at Medium BPA concentrations	Acute Confusional Senile Dementia	0.029511902985666447
Total Dysregulated Proteins at Medium BPA concentrations	Presenile dementia	0.029511902985666447
Total Dysregulated Proteins at Medium BPA concentrations	Alzheimer's Disease, Focal Onset	0.029511902985666447
Total Dysregulated Proteins at Medium BPA concentrations	Alzheimer Disease, Late Onset	0.029511902985666447
Total Dysregulated Core Proteins at Medium BPA concentrations	Enzymopathy	0.00019755455346686504
Total Dysregulated Core Proteins at Medium BPA concentrations	Undifferentiated carcinoma	0.0014819542549875536
Total Dysregulated Core Proteins at Medium BPA concentrations	Carcinomatosis	0.0014819542549875536
Total Dysregulated Core Proteins at Medium BPA concentrations	Mammary Carcinoma, Animal	0.0014819542549875536
Total Dysregulated Core Proteins at Medium BPA concentrations	Anaplastic carcinoma	0.0014819542549875536
Total Dysregulated Core Proteins at Medium BPA concentrations	Carcinoma, Spindle-Cell	0.0014819542549875536
Total Dysregulated Core Proteins at Medium BPA concentrations	Acute schizophrenia	0.0014819542549875536
Total Dysregulated Core Proteins at Medium BPA concentrations	Animal Mammary Neoplasms	0.0014819542549875536
Total Dysregulated Proteins at High BPA concentrations	Enzymopathy	0.044
Total Dysregulated Core Proteins at High BPA concentrations	Enzymopathy	0.0037683821826776996
Total Dysregulated Core Proteins at High BPA concentrations	Acute schizophrenia	0.02819596008623255
Total Dysregulated Proteins at Medium and High BPA concentrations	Enzymopathy	0.0013399463292464691
Total Dysregulated Proteins at Medium and High BPA concentrations	Acute schizophrenia	0.014383509575619331
Total Dysregulated Core Proteins at Medium and High BPA concentrations	Enzymopathy	3.296780252114103e-05
Total Dysregulated Core Proteins at Medium and High BPA concentrations	Acute schizophrenia	0.001410747986120785
Down-regulated Proteins at Medium and High BPA concentrations	Enzymopathy	0.0013399463292464691
Down-regulated Proteins at Medium and High BPA concentrations	Acute schizophrenia	0.014383509575619331
Down-regulated Core Proteins at Medium and High BPA concentrations	Enzymopathy	3.296780252114103e-05
Down-regulated Core Proteins at Medium and High BPA concentrations	Acute schizophrenia	0.001410747986120785

## Sheet: Suppl table S7F
Supplementary Table S7F: Network proximity between groups of proteins of interest and diseases, p-values are adjusted with Benjamini Hochberg correction for multiple comparisons. 0.01uM = Low BPA concentrations, 0.1uM = medium BPA concentrations, 1uM = high BPA concentrations.
						Total Dysregulated Proteins at Low BPA concentrations are proximal to 26 diseases
						Total Dysregulated Core Proteins at Low BPA concentrations are proximal to 155 diseases
Condition	Disease Name	FDR				Upregulated Proteins at Low BPA concentrations are proximal to 0 diseases
Total Dysregulated Proteins at Low BPA concentrations	Psychoses, Substance-Induced	0.046				Upregulated Core Proteins at Low BPA concentrations are proximal to 0 diseases
Total Dysregulated Proteins at Low BPA concentrations	Ramsay Hunt Paralysis Syndrome	0.046				Downregulated Proteins at Low BPA concentrations are proximal to 23 diseases
Total Dysregulated Proteins at Low BPA concentrations	Familial Juvenile Parkinsonism	0.046				Downregulated Core Proteins at Low BPA concentrations are proximal to 152 diseases
Total Dysregulated Proteins at Low BPA concentrations	Autosomal Dominant Parkinsonism	0.046				Total Dysregulated Proteins at Medium BPA concentrations are proximal to 1843 diseases
Total Dysregulated Proteins at Low BPA concentrations	Sarcomatoid Renal Cell Carcinoma	0.046				Total Dysregulated Core Proteins at Medium BPA concentrations are proximal to 1982 diseases
Total Dysregulated Proteins at Low BPA concentrations	Hypoxia	0.046				Upregulated Proteins at Medium BPA concentrations are proximal to 553 diseases
Total Dysregulated Proteins at Low BPA concentrations	Anoxemia	0.046				Upregulated Core Proteins at Medium BPA concentrations are proximal to 3 diseases
Total Dysregulated Proteins at Low BPA concentrations	Memory Disorder, Spatial	0.046				Downregulated Proteins at Medium BPA concentrations are proximal to 1781 diseases
Total Dysregulated Proteins at Low BPA concentrations	Parkinsonism, Experimental	0.046				Downregulated Core Proteins at Medium BPA concentrations are proximal to 1982 diseases
Total Dysregulated Proteins at Low BPA concentrations	Anoxia	0.046				Total Dysregulated Proteins at High BPA concentrations are proximal to 2128 diseases
Total Dysregulated Proteins at Low BPA concentrations	Age-Related Memory Disorders	0.046				Total Dysregulated Core Proteins at High BPA concentrations are proximal to 2417 diseases
Total Dysregulated Proteins at Low BPA concentrations	Autosomal Recessive Parkinsonism	0.046				Upregulated Proteins at High BPA concentrations are proximal to 1599 diseases
Total Dysregulated Proteins at Low BPA concentrations	Memory Disorder, Semantic	0.046				Upregulated Core Proteins at High BPA concentrations are proximal to 1369 diseases
Total Dysregulated Proteins at Low BPA concentrations	Keloid	0.046				Downregulated Proteins at High BPA concentrations are proximal to 2049 diseases
Total Dysregulated Proteins at Low BPA concentrations	Memory Loss	0.046				Downregulated Core Proteins at High BPA concentrations are proximal to 2365 diseases
Total Dysregulated Proteins at Low BPA concentrations	Hamman-Rich Disease	0.046				Total Dysregulated Proteins at Medium and High BPA concentrations are proximal to 1205 diseases
Total Dysregulated Proteins at Low BPA concentrations	Prostatic Intraepithelial Neoplasias	0.046				Total Dysregulated Core Proteins at Medium and High BPA concentrations are proximal to 1387 diseases
Total Dysregulated Proteins at Low BPA concentrations	Cholestasis, Extrahepatic	0.046				Upregulated Proteins at Medium and High BPA concentrations are proximal to 113 diseases
Total Dysregulated Proteins at Low BPA concentrations	Autosomal Dominant Juvenile Parkinson Disease	0.046				Upregulated Core Proteins at Medium and High BPA concentrations are proximal to 0 diseases
Total Dysregulated Proteins at Low BPA concentrations	Dystonia, Diurnal	0.046				Downregulated Proteins at Medium and High BPA concentrations are proximal to 1208 diseases
Total Dysregulated Proteins at Low BPA concentrations	Hypoxemia	0.046				Downregulated Core Proteins at Medium and High BPA concentrations are proximal to 1394 diseases
Total Dysregulated Proteins at Low BPA concentrations	Dystonia, Limb	0.046
Total Dysregulated Proteins at Low BPA concentrations	Collecting Duct Carcinoma of the Kidney	0.046
Total Dysregulated Proteins at Low BPA concentrations	Endometrial Carcinoma	0.046
Total Dysregulated Proteins at Low BPA concentrations	Ductal Carcinoma	0.046
Total Dysregulated Proteins at Low BPA concentrations	Usual Interstitial Pneumonia	0.046
Total Dysregulated Core Proteins at Low BPA concentrations	Osteoarthrosis Deformans	0.005
Total Dysregulated Core Proteins at Low BPA concentrations	Urogenital Abnormalities	0.005
Total Dysregulated Core Proteins at Low BPA concentrations	Abnormality of the eye	0.005
Total Dysregulated Core Proteins at Low BPA concentrations	Hearing abnormality	0.005
Total Dysregulated Core Proteins at Low BPA concentrations	Abnormality of nervous system morphology	0.005
Total Dysregulated Core Proteins at Low BPA concentrations	AUTISM, SUSCEPTIBILITY TO, 15	0.005
Total Dysregulated Core Proteins at Low BPA concentrations	Corneal Opacity	0.005
Total Dysregulated Core Proteins at Low BPA concentrations	Abnormality of the skeletal system	0.005
Total Dysregulated Core Proteins at Low BPA concentrations	Cardiovascular Abnormalities	0.005
Total Dysregulated Core Proteins at Low BPA concentrations	Lymphatic Metastasis	0.006
Total Dysregulated Core Proteins at Low BPA concentrations	Keloid	0.009
Total Dysregulated Core Proteins at Low BPA concentrations	Memory Disorder, Spatial	0.01
Total Dysregulated Core Proteins at Low BPA concentrations	Age-Related Memory Disorders	0.01
Total Dysregulated Core Proteins at Low BPA concentrations	Memory Disorder, Semantic	0.01
Total Dysregulated Core Proteins at Low BPA concentrations	Memory Loss	0.01
Total Dysregulated Core Proteins at Low BPA concentrations	Mammary Carcinoma, Animal	0.01
Total Dysregulated Core Proteins at Low BPA concentrations	Animal Mammary Neoplasms	0.01
Total Dysregulated Core Proteins at Low BPA concentrations	Undifferentiated carcinoma	0.019
Total Dysregulated Core Proteins at Low BPA concentrations	Carcinomatosis	0.019
Total Dysregulated Core Proteins at Low BPA concentrations	Anaplastic carcinoma	0.019
Total Dysregulated Core Proteins at Low BPA concentrations	Carcinoma, Spindle-Cell	0.019
Total Dysregulated Core Proteins at Low BPA concentrations	Eperythrozoonosis	0.024
Total Dysregulated Core Proteins at Low BPA concentrations	Ametropia	0.024
Total Dysregulated Core Proteins at Low BPA concentrations	Refractive Errors	0.024
Total Dysregulated Core Proteins at Low BPA concentrations	Mycoplasma Infections	0.024
Total Dysregulated Core Proteins at Low BPA concentrations	Primary pigmented nodular adrenocortical disease	0.034
Total Dysregulated Core Proteins at Low BPA concentrations	Testicular Diseases	0.034
Total Dysregulated Core Proteins at Low BPA concentrations	Hereditary Sensory Radicular Neuropathy	0.034
Total Dysregulated Core Proteins at Low BPA concentrations	Myeloid Leukemia, Chronic	0.034
Total Dysregulated Core Proteins at Low BPA concentrations	Adrenal Cortical Adenoma	0.034
Total Dysregulated Core Proteins at Low BPA concentrations	Conventional (Clear Cell) Renal Cell Carcinoma	0.034
Total Dysregulated Core Proteins at Low BPA concentrations	Stomach Neoplasms	0.034
Total Dysregulated Core Proteins at Low BPA concentrations	Hypertrophic Cardiomyopathy	0.034
Total Dysregulated Core Proteins at Low BPA concentrations	Paroxysmal Nerve Pain	0.034
Total Dysregulated Core Proteins at Low BPA concentrations	GLIOMA SUSCEPTIBILITY 1	0.034
Total Dysregulated Core Proteins at Low BPA concentrations	Malignant neoplasm of stomach	0.034
Total Dysregulated Core Proteins at Low BPA concentrations	Spongioblastoma	0.034
Total Dysregulated Core Proteins at Low BPA concentrations	Cancer of Urinary Tract	0.034
Total Dysregulated Core Proteins at Low BPA concentrations	Drug abuse	0.034
Total Dysregulated Core Proteins at Low BPA concentrations	Neuralgia, Ilioinguinal	0.034
Total Dysregulated Core Proteins at Low BPA concentrations	Substance Dependence	0.034
Total Dysregulated Core Proteins at Low BPA concentrations	Aneuploidy	0.034
Total Dysregulated Core Proteins at Low BPA concentrations	Nephroblastoma	0.034
Total Dysregulated Core Proteins at Low BPA concentrations	Prescription Drug Abuse	0.034
Total Dysregulated Core Proteins at Low BPA concentrations	Adult Hodgkin Lymphoma	0.034
Total Dysregulated Core Proteins at Low BPA concentrations	Familial Atypical Mole Melanoma Syndrome	0.034
Total Dysregulated Core Proteins at Low BPA concentrations	Precursor B-Cell Lymphoblastic Leukemia-Lymphoma	0.034
Total Dysregulated Core Proteins at Low BPA concentrations	Carcinoma in situ of esophagus	0.034
Total Dysregulated Core Proteins at Low BPA concentrations	Cleft palate with cleft lip	0.034
Total Dysregulated Core Proteins at Low BPA concentrations	Adrenal Cancer	0.034
Total Dysregulated Core Proteins at Low BPA concentrations	Enzymopathy	0.034
Total Dysregulated Core Proteins at Low BPA concentrations	Drug Dependence	0.034
Total Dysregulated Core Proteins at Low BPA concentrations	Posterior subcapsular cataract	0.034
Total Dysregulated Core Proteins at Low BPA concentrations	Hereditary Sensory Autonomic Neuropathy, Type 2	0.034
Total Dysregulated Core Proteins at Low BPA concentrations	Squamous cell carcinoma of esophagus	0.034
Total Dysregulated Core Proteins at Low BPA concentrations	Crohn Disease	0.034
Total Dysregulated Core Proteins at Low BPA concentrations	Cardiomyopathy, Dilated	0.034
Total Dysregulated Core Proteins at Low BPA concentrations	Ependymoblastoma	0.034
Total Dysregulated Core Proteins at Low BPA concentrations	Carcinogenesis	0.034
Total Dysregulated Core Proteins at Low BPA concentrations	Chemical and Drug Induced Liver Injury	0.034
Total Dysregulated Core Proteins at Low BPA concentrations	Familial Dementia	0.034
Total Dysregulated Core Proteins at Low BPA concentrations	Uveoretinal Coloboma	0.034
Total Dysregulated Core Proteins at Low BPA concentrations	Substance Use Disorders	0.034
Total Dysregulated Core Proteins at Low BPA concentrations	Hepatitis C	0.034
Total Dysregulated Core Proteins at Low BPA concentrations	Lymphocyte Rich Classical Hodgkin Lymphoma	0.034
Total Dysregulated Core Proteins at Low BPA concentrations	46,XY partial gonadal dysgenesis	0.034
Total Dysregulated Core Proteins at Low BPA concentrations	Nodular Lymphocyte Predominant Hodgkin Lymphoma	0.034
Total Dysregulated Core Proteins at Low BPA concentrations	Nephritis	0.034
Total Dysregulated Core Proteins at Low BPA concentrations	Stomach Carcinoma	0.034
Total Dysregulated Core Proteins at Low BPA concentrations	Sensory hearing loss	0.034
Total Dysregulated Core Proteins at Low BPA concentrations	Angle Closure Glaucoma	0.034
Total Dysregulated Core Proteins at Low BPA concentrations	Biliary Tract Neoplasm	0.034
Total Dysregulated Core Proteins at Low BPA concentrations	Medulloepithelioma	0.034
Total Dysregulated Core Proteins at Low BPA concentrations	Esophageal Neoplasms	0.034
Total Dysregulated Core Proteins at Low BPA concentrations	Neoplasm of uncertain or unknown behavior of stomach	0.034
Total Dysregulated Core Proteins at Low BPA concentrations	Malignant neoplasm of urinary bladder	0.034
Total Dysregulated Core Proteins at Low BPA concentrations	HIV Coinfection	0.034
Total Dysregulated Core Proteins at Low BPA concentrations	Cerebellar Diseases	0.034
Total Dysregulated Core Proteins at Low BPA concentrations	Cranioschisis	0.034
Total Dysregulated Core Proteins at Low BPA concentrations	Colorectal Neoplasms	0.034
Total Dysregulated Core Proteins at Low BPA concentrations	Mixed Cellularity Hodgkin Lymphoma	0.034
Total Dysregulated Core Proteins at Low BPA concentrations	Neuralgia, Supraorbital	0.034
Total Dysregulated Core Proteins at Low BPA concentrations	Precursor Cell Lymphoblastic Leukemia Lymphoma	0.034
Total Dysregulated Core Proteins at Low BPA concentrations	Benign neoplasm of esophagus	0.034
Total Dysregulated Core Proteins at Low BPA concentrations	Left ventricular noncompaction	0.034
Total Dysregulated Core Proteins at Low BPA concentrations	Hamman-Rich Disease	0.034
Total Dysregulated Core Proteins at Low BPA concentrations	Neuralgia, Stump	0.034
Total Dysregulated Core Proteins at Low BPA concentrations	Ulcerative Colitis	0.034
Total Dysregulated Core Proteins at Low BPA concentrations	Bladder Neoplasm	0.034
Total Dysregulated Core Proteins at Low BPA concentrations	Urologic Neoplasms	0.034
Total Dysregulated Core Proteins at Low BPA concentrations	Prostatic Intraepithelial Neoplasias	0.034
Total Dysregulated Core Proteins at Low BPA concentrations	African Burkitt's lymphoma	0.034
Total Dysregulated Core Proteins at Low BPA concentrations	Multiple congenital anomalies	0.034
Total Dysregulated Core Proteins at Low BPA concentrations	Drug habituation	0.034
Total Dysregulated Core Proteins at Low BPA concentrations	Dystonia, Diurnal	0.034
Total Dysregulated Core Proteins at Low BPA concentrations	Organic Mental Disorders, Substance-Induced	0.034
Total Dysregulated Core Proteins at Low BPA concentrations	Congenital neurologic anomalies	0.034
Total Dysregulated Core Proteins at Low BPA concentrations	Substance-Related Disorders	0.034
Total Dysregulated Core Proteins at Low BPA concentrations	Mammary Ductal Carcinoma	0.034
Total Dysregulated Core Proteins at Low BPA concentrations	Blood Platelet Disorders	0.034
Total Dysregulated Core Proteins at Low BPA concentrations	Adrenal Gland Neoplasms	0.034
Total Dysregulated Core Proteins at Low BPA concentrations	Invasive Ductal Breast Carcinoma	0.034
Total Dysregulated Core Proteins at Low BPA concentrations	Diabetic Nephropathy	0.034
Total Dysregulated Core Proteins at Low BPA concentrations	Neuralgia, Iliohypogastric Nerve	0.034
Total Dysregulated Core Proteins at Low BPA concentrations	Benign neoplasm of stomach	0.034
Total Dysregulated Core Proteins at Low BPA concentrations	Dystonia, Limb	0.034
Total Dysregulated Core Proteins at Low BPA concentrations	Neuralgia	0.034
Total Dysregulated Core Proteins at Low BPA concentrations	Nerve Pain	0.034
Total Dysregulated Core Proteins at Low BPA concentrations	Carcinoma in situ of stomach	0.034
Total Dysregulated Core Proteins at Low BPA concentrations	Chromosome Breakage	0.034
Total Dysregulated Core Proteins at Low BPA concentrations	Chromosome Breaks	0.034
Total Dysregulated Core Proteins at Low BPA concentrations	Helicobacter Infections	0.034
Total Dysregulated Core Proteins at Low BPA concentrations	Substance abuse problem	0.034
Total Dysregulated Core Proteins at Low BPA concentrations	Endometrial Carcinoma	0.034
Total Dysregulated Core Proteins at Low BPA concentrations	Ductal Carcinoma	0.034
Total Dysregulated Core Proteins at Low BPA concentrations	Cerebral Primitive Neuroectodermal Tumor	0.034
Total Dysregulated Core Proteins at Low BPA concentrations	Neuralgia, Atypical	0.034
Total Dysregulated Core Proteins at Low BPA concentrations	Neuralgia, Perineal	0.034
Total Dysregulated Core Proteins at Low BPA concentrations	Senile Paranoid Dementia	0.034
Total Dysregulated Core Proteins at Low BPA concentrations	Manic	0.034
Total Dysregulated Core Proteins at Low BPA concentrations	Usual Interstitial Pneumonia	0.034
Total Dysregulated Core Proteins at Low BPA concentrations	Hodgkin lymphoma, lymphocyte depletion	0.034
Total Dysregulated Core Proteins at Low BPA concentrations	Neuralgia, Vidian	0.034
Total Dysregulated Core Proteins at Low BPA concentrations	Drug Use Disorders	0.034
Total Dysregulated Core Proteins at Low BPA concentrations	Burkitt Leukemia	0.034
Total Dysregulated Core Proteins at Low BPA concentrations	Malignant neoplasm of esophagus	0.034
Total Dysregulated Core Proteins at Low BPA concentrations	Congenital diaphragmatic hernia	0.034
Total Dysregulated Core Proteins at Low BPA concentrations	Precursor B-cell lymphoblastic leukemia	0.034
Total Dysregulated Core Proteins at Low BPA concentrations	Dystonia, Paroxysmal	0.034
Total Dysregulated Core Proteins at Low BPA concentrations	Familial Idiopathic Pulmonary Fibrosis	0.034
Total Dysregulated Core Proteins at Low BPA concentrations	Nuclear non-senile cataract	0.034
Total Dysregulated Core Proteins at Low BPA concentrations	Carcinoma, Pancreatic Ductal	0.038
Total Dysregulated Core Proteins at Low BPA concentrations	Ureteral obstruction	0.04
Total Dysregulated Core Proteins at Low BPA concentrations	Congenital hernia of foramen of Morgagni	0.04
Total Dysregulated Core Proteins at Low BPA concentrations	Congenital hernia of foramen of Bochdalek	0.04
Total Dysregulated Core Proteins at Low BPA concentrations	Sarcomatoid Renal Cell Carcinoma	0.04
Total Dysregulated Core Proteins at Low BPA concentrations	Collecting Duct Carcinoma of the Kidney	0.04
Total Dysregulated Core Proteins at Low BPA concentrations	Ramsay Hunt Paralysis Syndrome	0.045
Total Dysregulated Core Proteins at Low BPA concentrations	Familial Juvenile Parkinsonism	0.045
Total Dysregulated Core Proteins at Low BPA concentrations	Autosomal Dominant Parkinsonism	0.045
Total Dysregulated Core Proteins at Low BPA concentrations	Malignant neoplasm of prostate	0.045
Total Dysregulated Core Proteins at Low BPA concentrations	Parkinsonism, Experimental	0.045
Total Dysregulated Core Proteins at Low BPA concentrations	Hyalinosis, Segmental Glomerular	0.045
Total Dysregulated Core Proteins at Low BPA concentrations	Child Development Deviations	0.045
Total Dysregulated Core Proteins at Low BPA concentrations	Autosomal Recessive Parkinsonism	0.045
Total Dysregulated Core Proteins at Low BPA concentrations	Bilateral Wilms Tumor	0.045
Total Dysregulated Core Proteins at Low BPA concentrations	Pigmented Basal Cell Carcinoma	0.045
Total Dysregulated Core Proteins at Low BPA concentrations	Autosomal Dominant Juvenile Parkinson Disease	0.045
Total Dysregulated Core Proteins at Low BPA concentrations	Malignant neoplasm of ovary	0.045
Total Dysregulated Core Proteins at Low BPA concentrations	Child Development Disorders, Specific	0.045
Total Dysregulated Core Proteins at Low BPA concentrations	Neoplasm of uncertain or unknown behavior of ovary	0.049
Total Dysregulated Core Proteins at Low BPA concentrations	Global developmental delay	0.049
Total Dysregulated Core Proteins at Low BPA concentrations	Developmental Disabilities	0.049
Total Dysregulated Core Proteins at Low BPA concentrations	Severe Congenital Microcephaly	0.049
Total Dysregulated Core Proteins at Low BPA concentrations	Epileptic encephalopathy	0.049
Downregulated Proteins at Low BPA concentrations	Ramsay Hunt Paralysis Syndrome	0.032
Downregulated Proteins at Low BPA concentrations	Familial Juvenile Parkinsonism	0.032
Downregulated Proteins at Low BPA concentrations	Autosomal Dominant Parkinsonism	0.032
Downregulated Proteins at Low BPA concentrations	Memory Disorder, Spatial	0.032
Downregulated Proteins at Low BPA concentrations	Parkinsonism, Experimental	0.032
Downregulated Proteins at Low BPA concentrations	Age-Related Memory Disorders	0.032
Downregulated Proteins at Low BPA concentrations	Autosomal Recessive Parkinsonism	0.032
Downregulated Proteins at Low BPA concentrations	Memory Disorder, Semantic	0.032
Downregulated Proteins at Low BPA concentrations	Memory Loss	0.032
Downregulated Proteins at Low BPA concentrations	Prostatic Intraepithelial Neoplasias	0.032
Downregulated Proteins at Low BPA concentrations	Cholestasis, Extrahepatic	0.032
Downregulated Proteins at Low BPA concentrations	Autosomal Dominant Juvenile Parkinson Disease	0.032
Downregulated Proteins at Low BPA concentrations	Ductal Carcinoma	0.032
Downregulated Proteins at Low BPA concentrations	Endometrial Carcinoma	0.037
Downregulated Proteins at Low BPA concentrations	Psychoses, Substance-Induced	0.045
Downregulated Proteins at Low BPA concentrations	Keloid	0.045
Downregulated Proteins at Low BPA concentrations	Hamman-Rich Disease	0.045
Downregulated Proteins at Low BPA concentrations	Dystonia, Diurnal	0.045
Downregulated Proteins at Low BPA concentrations	Dystonia, Limb	0.045
Downregulated Proteins at Low BPA concentrations	Cardiovascular Abnormalities	0.045
Downregulated Proteins at Low BPA concentrations	Usual Interstitial Pneumonia	0.045
Downregulated Proteins at Low BPA concentrations	Dystonia, Paroxysmal	0.048
Downregulated Proteins at Low BPA concentrations	Familial Idiopathic Pulmonary Fibrosis	0.048
Downregulated Core Proteins at Low BPA concentrations	Osteoarthrosis Deformans	0.005
Downregulated Core Proteins at Low BPA concentrations	Urogenital Abnormalities	0.005
Downregulated Core Proteins at Low BPA concentrations	Abnormality of the eye	0.005
Downregulated Core Proteins at Low BPA concentrations	Hearing abnormality	0.005
Downregulated Core Proteins at Low BPA concentrations	Abnormality of nervous system morphology	0.005
Downregulated Core Proteins at Low BPA concentrations	Cardiovascular Abnormalities	0.005
Downregulated Core Proteins at Low BPA concentrations	AUTISM, SUSCEPTIBILITY TO, 15	0.005
Downregulated Core Proteins at Low BPA concentrations	Corneal Opacity	0.005
Downregulated Core Proteins at Low BPA concentrations	Abnormality of the skeletal system	0.005
Downregulated Core Proteins at Low BPA concentrations	Lymphatic Metastasis	0.006
Downregulated Core Proteins at Low BPA concentrations	Keloid	0.011
Downregulated Core Proteins at Low BPA concentrations	Mammary Carcinoma, Animal	0.012
Downregulated Core Proteins at Low BPA concentrations	Animal Mammary Neoplasms	0.012
Downregulated Core Proteins at Low BPA concentrations	Memory Disorder, Spatial	0.013
Downregulated Core Proteins at Low BPA concentrations	Age-Related Memory Disorders	0.013
Downregulated Core Proteins at Low BPA concentrations	Memory Disorder, Semantic	0.013
Downregulated Core Proteins at Low BPA concentrations	Memory Loss	0.013
Downregulated Core Proteins at Low BPA concentrations	Undifferentiated carcinoma	0.016
Downregulated Core Proteins at Low BPA concentrations	Carcinomatosis	0.016
Downregulated Core Proteins at Low BPA concentrations	Anaplastic carcinoma	0.016
Downregulated Core Proteins at Low BPA concentrations	Carcinoma, Spindle-Cell	0.016
Downregulated Core Proteins at Low BPA concentrations	Eperythrozoonosis	0.026
Downregulated Core Proteins at Low BPA concentrations	Ametropia	0.026
Downregulated Core Proteins at Low BPA concentrations	Refractive Errors	0.026
Downregulated Core Proteins at Low BPA concentrations	Mycoplasma Infections	0.026
Downregulated Core Proteins at Low BPA concentrations	Conventional (Clear Cell) Renal Cell Carcinoma	0.032
Downregulated Core Proteins at Low BPA concentrations	Primary pigmented nodular adrenocortical disease	0.032
Downregulated Core Proteins at Low BPA concentrations	Stomach Neoplasms	0.032
Downregulated Core Proteins at Low BPA concentrations	Hypertrophic Cardiomyopathy	0.032
Downregulated Core Proteins at Low BPA concentrations	Paroxysmal Nerve Pain	0.032
Downregulated Core Proteins at Low BPA concentrations	GLIOMA SUSCEPTIBILITY 1	0.032
Downregulated Core Proteins at Low BPA concentrations	Testicular Diseases	0.032
Downregulated Core Proteins at Low BPA concentrations	Malignant neoplasm of stomach	0.032
Downregulated Core Proteins at Low BPA concentrations	Spongioblastoma	0.032
Downregulated Core Proteins at Low BPA concentrations	Cancer of Urinary Tract	0.032
Downregulated Core Proteins at Low BPA concentrations	Drug abuse	0.032
Downregulated Core Proteins at Low BPA concentrations	Neuralgia, Ilioinguinal	0.032
Downregulated Core Proteins at Low BPA concentrations	Substance Dependence	0.032
Downregulated Core Proteins at Low BPA concentrations	Aneuploidy	0.032
Downregulated Core Proteins at Low BPA concentrations	Nephroblastoma	0.032
Downregulated Core Proteins at Low BPA concentrations	Prescription Drug Abuse	0.032
Downregulated Core Proteins at Low BPA concentrations	Adult Hodgkin Lymphoma	0.032
Downregulated Core Proteins at Low BPA concentrations	Familial Atypical Mole Melanoma Syndrome	0.032
Downregulated Core Proteins at Low BPA concentrations	Precursor B-Cell Lymphoblastic Leukemia-Lymphoma	0.032
Downregulated Core Proteins at Low BPA concentrations	Carcinoma in situ of esophagus	0.032
Downregulated Core Proteins at Low BPA concentrations	Cleft palate with cleft lip	0.032
Downregulated Core Proteins at Low BPA concentrations	Adrenal Cancer	0.032
Downregulated Core Proteins at Low BPA concentrations	Enzymopathy	0.032
Downregulated Core Proteins at Low BPA concentrations	Drug Dependence	0.032
Downregulated Core Proteins at Low BPA concentrations	Posterior subcapsular cataract	0.032
Downregulated Core Proteins at Low BPA concentrations	Hereditary Sensory Autonomic Neuropathy, Type 2	0.032
Downregulated Core Proteins at Low BPA concentrations	Squamous cell carcinoma of esophagus	0.032
Downregulated Core Proteins at Low BPA concentrations	Crohn Disease	0.032
Downregulated Core Proteins at Low BPA concentrations	Cardiomyopathy, Dilated	0.032
Downregulated Core Proteins at Low BPA concentrations	Hereditary Sensory Radicular Neuropathy	0.032
Downregulated Core Proteins at Low BPA concentrations	Ependymoblastoma	0.032
Downregulated Core Proteins at Low BPA concentrations	Carcinogenesis	0.032
Downregulated Core Proteins at Low BPA concentrations	Chemical and Drug Induced Liver Injury	0.032
Downregulated Core Proteins at Low BPA concentrations	Familial Dementia	0.032
Downregulated Core Proteins at Low BPA concentrations	Myeloid Leukemia, Chronic	0.032
Downregulated Core Proteins at Low BPA concentrations	Uveoretinal Coloboma	0.032
Downregulated Core Proteins at Low BPA concentrations	Substance Use Disorders	0.032
Downregulated Core Proteins at Low BPA concentrations	Hepatitis C	0.032
Downregulated Core Proteins at Low BPA concentrations	Lymphocyte Rich Classical Hodgkin Lymphoma	0.032
Downregulated Core Proteins at Low BPA concentrations	46,XY partial gonadal dysgenesis	0.032
Downregulated Core Proteins at Low BPA concentrations	Nodular Lymphocyte Predominant Hodgkin Lymphoma	0.032
Downregulated Core Proteins at Low BPA concentrations	Nephritis	0.032
Downregulated Core Proteins at Low BPA concentrations	Stomach Carcinoma	0.032
Downregulated Core Proteins at Low BPA concentrations	Sensory hearing loss	0.032
Downregulated Core Proteins at Low BPA concentrations	Angle Closure Glaucoma	0.032
Downregulated Core Proteins at Low BPA concentrations	Biliary Tract Neoplasm	0.032
Downregulated Core Proteins at Low BPA concentrations	Medulloepithelioma	0.032
Downregulated Core Proteins at Low BPA concentrations	Adrenal Cortical Adenoma	0.032
Downregulated Core Proteins at Low BPA concentrations	Esophageal Neoplasms	0.032
Downregulated Core Proteins at Low BPA concentrations	Neoplasm of uncertain or unknown behavior of stomach	0.032
Downregulated Core Proteins at Low BPA concentrations	Malignant neoplasm of urinary bladder	0.032
Downregulated Core Proteins at Low BPA concentrations	HIV Coinfection	0.032
Downregulated Core Proteins at Low BPA concentrations	Cerebellar Diseases	0.032
Downregulated Core Proteins at Low BPA concentrations	Cranioschisis	0.032
Downregulated Core Proteins at Low BPA concentrations	Colorectal Neoplasms	0.032
Downregulated Core Proteins at Low BPA concentrations	Mixed Cellularity Hodgkin Lymphoma	0.032
Downregulated Core Proteins at Low BPA concentrations	Neuralgia, Supraorbital	0.032
Downregulated Core Proteins at Low BPA concentrations	Precursor Cell Lymphoblastic Leukemia Lymphoma	0.032
Downregulated Core Proteins at Low BPA concentrations	Benign neoplasm of esophagus	0.032
Downregulated Core Proteins at Low BPA concentrations	Left ventricular noncompaction	0.032
Downregulated Core Proteins at Low BPA concentrations	Hamman-Rich Disease	0.032
Downregulated Core Proteins at Low BPA concentrations	Neuralgia, Stump	0.032
Downregulated Core Proteins at Low BPA concentrations	Ulcerative Colitis	0.032
Downregulated Core Proteins at Low BPA concentrations	Bladder Neoplasm	0.032
Downregulated Core Proteins at Low BPA concentrations	Urologic Neoplasms	0.032
Downregulated Core Proteins at Low BPA concentrations	Prostatic Intraepithelial Neoplasias	0.032
Downregulated Core Proteins at Low BPA concentrations	African Burkitt's lymphoma	0.032
Downregulated Core Proteins at Low BPA concentrations	Multiple congenital anomalies	0.032
Downregulated Core Proteins at Low BPA concentrations	Drug habituation	0.032
Downregulated Core Proteins at Low BPA concentrations	Dystonia, Diurnal	0.032
Downregulated Core Proteins at Low BPA concentrations	Organic Mental Disorders, Substance-Induced	0.032
Downregulated Core Proteins at Low BPA concentrations	Congenital neurologic anomalies	0.032
Downregulated Core Proteins at Low BPA concentrations	Substance-Related Disorders	0.032
Downregulated Core Proteins at Low BPA concentrations	Mammary Ductal Carcinoma	0.032
Downregulated Core Proteins at Low BPA concentrations	Blood Platelet Disorders	0.032
Downregulated Core Proteins at Low BPA concentrations	Adrenal Gland Neoplasms	0.032
Downregulated Core Proteins at Low BPA concentrations	Invasive Ductal Breast Carcinoma	0.032
Downregulated Core Proteins at Low BPA concentrations	Diabetic Nephropathy	0.032
Downregulated Core Proteins at Low BPA concentrations	Neuralgia, Iliohypogastric Nerve	0.032
Downregulated Core Proteins at Low BPA concentrations	Benign neoplasm of stomach	0.032
Downregulated Core Proteins at Low BPA concentrations	Dystonia, Limb	0.032
Downregulated Core Proteins at Low BPA concentrations	Neuralgia	0.032
Downregulated Core Proteins at Low BPA concentrations	Nerve Pain	0.032
Downregulated Core Proteins at Low BPA concentrations	Carcinoma in situ of stomach	0.032
Downregulated Core Proteins at Low BPA concentrations	Chromosome Breakage	0.032
Downregulated Core Proteins at Low BPA concentrations	Chromosome Breaks	0.032
Downregulated Core Proteins at Low BPA concentrations	Helicobacter Infections	0.032
Downregulated Core Proteins at Low BPA concentrations	Endometrial Carcinoma	0.032
Downregulated Core Proteins at Low BPA concentrations	Ductal Carcinoma	0.032
Downregulated Core Proteins at Low BPA concentrations	Cerebral Primitive Neuroectodermal Tumor	0.032
Downregulated Core Proteins at Low BPA concentrations	Neuralgia, Atypical	0.032
Downregulated Core Proteins at Low BPA concentrations	Neuralgia, Perineal	0.032
Downregulated Core Proteins at Low BPA concentrations	Senile Paranoid Dementia	0.032
Downregulated Core Proteins at Low BPA concentrations	Manic	0.032
Downregulated Core Proteins at Low BPA concentrations	Usual Interstitial Pneumonia	0.032
Downregulated Core Proteins at Low BPA concentrations	Hodgkin lymphoma, lymphocyte depletion	0.032
Downregulated Core Proteins at Low BPA concentrations	Neuralgia, Vidian	0.032
Downregulated Core Proteins at Low BPA concentrations	Drug Use Disorders	0.032
Downregulated Core Proteins at Low BPA concentrations	Burkitt Leukemia	0.032
Downregulated Core Proteins at Low BPA concentrations	Malignant neoplasm of esophagus	0.032
Downregulated Core Proteins at Low BPA concentrations	Congenital diaphragmatic hernia	0.033
Downregulated Core Proteins at Low BPA concentrations	Precursor B-cell lymphoblastic leukemia	0.033
Downregulated Core Proteins at Low BPA concentrations	Congenital hernia of foramen of Morgagni	0.033
Downregulated Core Proteins at Low BPA concentrations	Congenital hernia of foramen of Bochdalek	0.033
Downregulated Core Proteins at Low BPA concentrations	Dystonia, Paroxysmal	0.034
Downregulated Core Proteins at Low BPA concentrations	Familial Idiopathic Pulmonary Fibrosis	0.034
Downregulated Core Proteins at Low BPA concentrations	Nuclear non-senile cataract	0.034
Downregulated Core Proteins at Low BPA concentrations	Carcinoma, Pancreatic Ductal	0.037
Downregulated Core Proteins at Low BPA concentrations	Substance abuse problem	0.037
Downregulated Core Proteins at Low BPA concentrations	Sarcomatoid Renal Cell Carcinoma	0.041
Downregulated Core Proteins at Low BPA concentrations	Collecting Duct Carcinoma of the Kidney	0.041
Downregulated Core Proteins at Low BPA concentrations	Ureteral obstruction	0.041
Downregulated Core Proteins at Low BPA concentrations	Ramsay Hunt Paralysis Syndrome	0.043
Downregulated Core Proteins at Low BPA concentrations	Familial Juvenile Parkinsonism	0.043
Downregulated Core Proteins at Low BPA concentrations	Autosomal Dominant Parkinsonism	0.043
Downregulated Core Proteins at Low BPA concentrations	Malignant neoplasm of prostate	0.043
Downregulated Core Proteins at Low BPA concentrations	Parkinsonism, Experimental	0.043
Downregulated Core Proteins at Low BPA concentrations	Hyalinosis, Segmental Glomerular	0.043
Downregulated Core Proteins at Low BPA concentrations	Child Development Deviations	0.043
Downregulated Core Proteins at Low BPA concentrations	Autosomal Recessive Parkinsonism	0.043
Downregulated Core Proteins at Low BPA concentrations	Bilateral Wilms Tumor	0.043
Downregulated Core Proteins at Low BPA concentrations	Pigmented Basal Cell Carcinoma	0.043
Downregulated Core Proteins at Low BPA concentrations	Autosomal Dominant Juvenile Parkinson Disease	0.043
Downregulated Core Proteins at Low BPA concentrations	Malignant neoplasm of ovary	0.043
Downregulated Core Proteins at Low BPA concentrations	Child Development Disorders, Specific	0.043
Downregulated Core Proteins at Low BPA concentrations	Global developmental delay	0.047
Downregulated Core Proteins at Low BPA concentrations	Severe Congenital Microcephaly	0.047
Total Dysregulated Proteins at Medium BPA concentrations	Undifferentiated carcinoma	1.5357365550710801e-15
Total Dysregulated Proteins at Medium BPA concentrations	Carcinomatosis	1.5357365550710801e-15
Total Dysregulated Proteins at Medium BPA concentrations	Mammary Carcinoma, Animal	1.5357365550710801e-15
Total Dysregulated Proteins at Medium BPA concentrations	Anaplastic carcinoma	1.5357365550710801e-15
Total Dysregulated Proteins at Medium BPA concentrations	Carcinoma, Spindle-Cell	1.5357365550710801e-15
Total Dysregulated Proteins at Medium BPA concentrations	Animal Mammary Neoplasms	1.5357365550710801e-15
Total Dysregulated Proteins at Medium BPA concentrations	Neoplasms, Experimental	1.0403176475175431e-12
Total Dysregulated Proteins at Medium BPA concentrations	Acute Confusional Senile Dementia	7.035421999197211e-12
Total Dysregulated Proteins at Medium BPA concentrations	Malignant neoplasm of breast	7.035421999197211e-12
Total Dysregulated Proteins at Medium BPA concentrations	Presenile dementia	7.035421999197211e-12
Total Dysregulated Proteins at Medium BPA concentrations	Alzheimer's Disease, Focal Onset	7.035421999197211e-12
Total Dysregulated Proteins at Medium BPA concentrations	Alzheimer Disease, Late Onset	7.035421999197211e-12
Total Dysregulated Proteins at Medium BPA concentrations	Breast Carcinoma	7.049254134785722e-12
Total Dysregulated Proteins at Medium BPA concentrations	Osteoarthrosis Deformans	5.717977854015895e-11
Total Dysregulated Proteins at Medium BPA concentrations	Mycoplasma-Induced Stevens-Johnson Syndrome	9.970045797497778e-11
Total Dysregulated Proteins at Medium BPA concentrations	Drug-Induced Stevens Johnson Syndrome	9.970045797497778e-11
Total Dysregulated Proteins at Medium BPA concentrations	Stevens-Johnson Syndrome Toxic Epidermal Necrolysis Spectrum	9.970045797497778e-11
Total Dysregulated Proteins at Medium BPA concentrations	melanoma	1.7815329516409676e-10
Total Dysregulated Proteins at Medium BPA concentrations	Female sterility	4.258206393588781e-10
Total Dysregulated Proteins at Medium BPA concentrations	Subfertility, Female	4.258206393588781e-10
Total Dysregulated Proteins at Medium BPA concentrations	Female infertility	4.258206393588781e-10
Total Dysregulated Proteins at Medium BPA concentrations	Sterility, Postpartum	4.258206393588781e-10
Total Dysregulated Proteins at Medium BPA concentrations	Amyotrophic Lateral Sclerosis	6.316870361363934e-10
Total Dysregulated Proteins at Medium BPA concentrations	Atherogenesis	6.806780488393109e-10
Total Dysregulated Proteins at Medium BPA concentrations	Malignant neoplasm of ovary	6.806780488393109e-10
Total Dysregulated Proteins at Medium BPA concentrations	Acute Coronary Syndrome	9.35055801570654e-10
Total Dysregulated Proteins at Medium BPA concentrations	Keloid	9.35055801570654e-10
Total Dysregulated Proteins at Medium BPA concentrations	Prostatic Intraepithelial Neoplasias	2.0758954491786577e-09
Total Dysregulated Proteins at Medium BPA concentrations	Neurogenic Muscular Atrophy	2.524153098360125e-09
Total Dysregulated Proteins at Medium BPA concentrations	Sarcomatoid Renal Cell Carcinoma	4.71662334377067e-09
Total Dysregulated Proteins at Medium BPA concentrations	Collecting Duct Carcinoma of the Kidney	4.71662334377067e-09
Total Dysregulated Proteins at Medium BPA concentrations	Anxiety neurosis (finding)	7.046934715707555e-09
Total Dysregulated Proteins at Medium BPA concentrations	Anxiety States, Neurotic	7.046934715707555e-09
Total Dysregulated Proteins at Medium BPA concentrations	Mammary Neoplasms, Experimental	8.562780185882632e-09
Total Dysregulated Proteins at Medium BPA concentrations	Disease Exacerbation	1.0396824522241481e-08
Total Dysregulated Proteins at Medium BPA concentrations	Hypertensive disease	1.0396824522241481e-08
Total Dysregulated Proteins at Medium BPA concentrations	Breast adenocarcinoma	1.0396824522241481e-08
Total Dysregulated Proteins at Medium BPA concentrations	Ramsay Hunt Paralysis Syndrome	1.264044001585581e-08
Total Dysregulated Proteins at Medium BPA concentrations	Familial Juvenile Parkinsonism	1.264044001585581e-08
Total Dysregulated Proteins at Medium BPA concentrations	Autosomal Dominant Parkinsonism	1.264044001585581e-08
Total Dysregulated Proteins at Medium BPA concentrations	Parkinsonism, Experimental	1.264044001585581e-08
Total Dysregulated Proteins at Medium BPA concentrations	Autosomal Recessive Parkinsonism	1.264044001585581e-08
Total Dysregulated Proteins at Medium BPA concentrations	Autosomal Dominant Juvenile Parkinson Disease	1.264044001585581e-08
Total Dysregulated Proteins at Medium BPA concentrations	Cerebral Astrocytoma	3.695892258258174e-08
Total Dysregulated Proteins at Medium BPA concentrations	Childhood Cerebral Astrocytoma	3.695892258258174e-08
Total Dysregulated Proteins at Medium BPA concentrations	Diffuse Astrocytoma	3.695892258258174e-08
Total Dysregulated Proteins at Medium BPA concentrations	Weight decreased	3.695892258258174e-08
Total Dysregulated Proteins at Medium BPA concentrations	Mixed oligoastrocytoma	3.695892258258174e-08
Total Dysregulated Proteins at Medium BPA concentrations	Juvenile Pilocytic Astrocytoma	3.695892258258174e-08
Total Dysregulated Proteins at Medium BPA concentrations	Astrocytoma	3.695892258258174e-08
Total Dysregulated Proteins at Medium BPA concentrations	Grade I Astrocytoma	3.695892258258174e-08
Total Dysregulated Proteins at Medium BPA concentrations	Subependymal Giant Cell Astrocytoma	3.695892258258174e-08
Total Dysregulated Proteins at Medium BPA concentrations	Intracranial Astrocytoma	3.695892258258174e-08
Total Dysregulated Proteins at Medium BPA concentrations	HIV Coinfection	4.2345809653159774e-08
Total Dysregulated Proteins at Medium BPA concentrations	Endometrioma	4.510427376650319e-08
Total Dysregulated Proteins at Medium BPA concentrations	Diabetes Mellitus, Experimental	7.526714267063472e-08
Total Dysregulated Proteins at Medium BPA concentrations	Colorectal Neoplasms	7.936567037132608e-08
Total Dysregulated Proteins at Medium BPA concentrations	Necrosis	7.936567037132608e-08
Total Dysregulated Proteins at Medium BPA concentrations	Fibrillary Astrocytoma	8.301387411624962e-08
Total Dysregulated Proteins at Medium BPA concentrations	Protoplasmic astrocytoma	8.301387411624962e-08
Total Dysregulated Proteins at Medium BPA concentrations	Gemistocytic astrocytoma	8.301387411624962e-08
Total Dysregulated Proteins at Medium BPA concentrations	Neoplasm of uncertain or unknown behavior of ovary	8.561059737064647e-08
Total Dysregulated Proteins at Medium BPA concentrations	Neoplasm Recurrence, Local	8.561059737064647e-08
Total Dysregulated Proteins at Medium BPA concentrations	Amyotrophic Lateral Sclerosis, Familial	8.561059737064647e-08
Total Dysregulated Proteins at Medium BPA concentrations	Marijuana Abuse	9.935965162906818e-08
Total Dysregulated Proteins at Medium BPA concentrations	ovarian neoplasm	1.2856877044500123e-07
Total Dysregulated Proteins at Medium BPA concentrations	Hypertrophic obstructive cardiomyopathy	1.7171216575799508e-07
Total Dysregulated Proteins at Medium BPA concentrations	Memory Disorder, Spatial	1.7171216575799508e-07
Total Dysregulated Proteins at Medium BPA concentrations	Age-Related Memory Disorders	1.7171216575799508e-07
Total Dysregulated Proteins at Medium BPA concentrations	Memory Disorder, Semantic	1.7171216575799508e-07
Total Dysregulated Proteins at Medium BPA concentrations	Memory Loss	1.7171216575799508e-07
Total Dysregulated Proteins at Medium BPA concentrations	Weight Gain	2.040905367426185e-07
Total Dysregulated Proteins at Medium BPA concentrations	Osteoporosis, Age-Related	3.3245674603304387e-07
Total Dysregulated Proteins at Medium BPA concentrations	Osteoporosis, Senile	3.3245674603304387e-07
Total Dysregulated Proteins at Medium BPA concentrations	Post-Traumatic Osteoporosis	3.3245674603304387e-07
Total Dysregulated Proteins at Medium BPA concentrations	Malignant neoplasm of prostate	3.759556640477898e-07
Total Dysregulated Proteins at Medium BPA concentrations	Lung Neoplasms	4.0457533916238296e-07
Total Dysregulated Proteins at Medium BPA concentrations	Amyotrophic Lateral Sclerosis With Dementia	4.073511365461116e-07
Total Dysregulated Proteins at Medium BPA concentrations	Dermatitis	4.1955800495236064e-07
Total Dysregulated Proteins at Medium BPA concentrations	Paroxysmal Nerve Pain	4.1955800495236064e-07
Total Dysregulated Proteins at Medium BPA concentrations	Neuralgia, Ilioinguinal	4.1955800495236064e-07
Total Dysregulated Proteins at Medium BPA concentrations	Neuralgia, Supraorbital	4.1955800495236064e-07
Total Dysregulated Proteins at Medium BPA concentrations	Neuralgia, Stump	4.1955800495236064e-07
Total Dysregulated Proteins at Medium BPA concentrations	Neuralgia, Iliohypogastric Nerve	4.1955800495236064e-07
Total Dysregulated Proteins at Medium BPA concentrations	Neuralgia	4.1955800495236064e-07
Total Dysregulated Proteins at Medium BPA concentrations	Nerve Pain	4.1955800495236064e-07
Total Dysregulated Proteins at Medium BPA concentrations	Neuralgia, Atypical	4.1955800495236064e-07
Total Dysregulated Proteins at Medium BPA concentrations	Neuralgia, Perineal	4.1955800495236064e-07
Total Dysregulated Proteins at Medium BPA concentrations	Neuralgia, Vidian	4.1955800495236064e-07
Total Dysregulated Proteins at Medium BPA concentrations	Alveolitis, Fibrosing	4.6027076748889943e-07
Total Dysregulated Proteins at Medium BPA concentrations	Cirrhosis	4.6825489869186197e-07
Total Dysregulated Proteins at Medium BPA concentrations	Craniofacial Abnormalities	4.6825489869186197e-07
Total Dysregulated Proteins at Medium BPA concentrations	Transient Cerebral Ischemia	4.7461262923349347e-07
Total Dysregulated Proteins at Medium BPA concentrations	Adenoma, Trabecular	4.7461262923349347e-07
Total Dysregulated Proteins at Medium BPA concentrations	Adenoma, Monomorphic	4.7461262923349347e-07
Total Dysregulated Proteins at Medium BPA concentrations	Papillary adenoma	4.7461262923349347e-07
Total Dysregulated Proteins at Medium BPA concentrations	Brain Stem Ischemia, Transient	4.7461262923349347e-07
Total Dysregulated Proteins at Medium BPA concentrations	Transient Ischemic Attack, Anterior Circulation	4.7461262923349347e-07
Total Dysregulated Proteins at Medium BPA concentrations	Adenoma, Microcystic	4.7461262923349347e-07
Total Dysregulated Proteins at Medium BPA concentrations	Posterior Circulation Transient Ischemic Attack	4.7461262923349347e-07
Total Dysregulated Proteins at Medium BPA concentrations	Crescendo Transient Ischemic Attacks	4.7461262923349347e-07
Total Dysregulated Proteins at Medium BPA concentrations	Adenoma, Basal Cell	4.7461262923349347e-07
Total Dysregulated Proteins at Medium BPA concentrations	Follicular adenoma	4.7461262923349347e-07
Total Dysregulated Proteins at Medium BPA concentrations	Adenoma	4.7461262923349347e-07
Total Dysregulated Proteins at Medium BPA concentrations	Transient Ischemic Attack, Vertebrobasilar Circulation	4.7461262923349347e-07
Total Dysregulated Proteins at Medium BPA concentrations	Carotid Circulation Transient Ischemic Attack	4.7461262923349347e-07
Total Dysregulated Proteins at Medium BPA concentrations	Depressive disorder	5.189759755799917e-07
Total Dysregulated Proteins at Medium BPA concentrations	Depression, Neurotic	6.064131181069742e-07
Total Dysregulated Proteins at Medium BPA concentrations	Medullomyoblastoma	6.791964769107586e-07
Total Dysregulated Proteins at Medium BPA concentrations	Melanotic medulloblastoma	6.791964769107586e-07
Total Dysregulated Proteins at Medium BPA concentrations	Childhood Medulloblastoma	6.791964769107586e-07
Total Dysregulated Proteins at Medium BPA concentrations	Adult Medulloblastoma	6.791964769107586e-07
Total Dysregulated Proteins at Medium BPA concentrations	Nodular glomerulosclerosis	8.973392981344123e-07
Total Dysregulated Proteins at Medium BPA concentrations	Depressive Syndrome	8.973392981344123e-07
Total Dysregulated Proteins at Medium BPA concentrations	Condition, Preneoplastic	9.176495802581595e-07
Total Dysregulated Proteins at Medium BPA concentrations	Precancerous Conditions	9.176495802581595e-07
Total Dysregulated Proteins at Medium BPA concentrations	Hyalinosis, Segmental Glomerular	1.0447750229299e-06
Total Dysregulated Proteins at Medium BPA concentrations	Adenocarcinoma of lung (disorder)	1.0727786611161114e-06
Total Dysregulated Proteins at Medium BPA concentrations	Prostatic Neoplasms	1.0727786611161114e-06
Total Dysregulated Proteins at Medium BPA concentrations	Chronic Lung Injury	1.1305989691408493e-06
Total Dysregulated Proteins at Medium BPA concentrations	Contact hypersensitivity	1.1305989691408493e-06
Total Dysregulated Proteins at Medium BPA concentrations	Hamman-Rich Disease	1.1305989691408493e-06
Total Dysregulated Proteins at Medium BPA concentrations	Lung Injury	1.1305989691408493e-06
Total Dysregulated Proteins at Medium BPA concentrations	Contact Dermatitis	1.1305989691408493e-06
Total Dysregulated Proteins at Medium BPA concentrations	Usual Interstitial Pneumonia	1.1305989691408493e-06
Total Dysregulated Proteins at Medium BPA concentrations	Colorectal Carcinoma	1.1651760203067946e-06
Total Dysregulated Proteins at Medium BPA concentrations	Familial Idiopathic Pulmonary Fibrosis	1.462251254172661e-06
Total Dysregulated Proteins at Medium BPA concentrations	Alloxan Diabetes	1.6868150285606881e-06
Total Dysregulated Proteins at Medium BPA concentrations	Endometrial Carcinoma	1.6868150285606881e-06
Total Dysregulated Proteins at Medium BPA concentrations	Cholestasis, Extrahepatic	2.119558028161165e-06
Total Dysregulated Proteins at Medium BPA concentrations	Hypoxia	2.3996261299434025e-06
Total Dysregulated Proteins at Medium BPA concentrations	Anoxemia	2.3996261299434025e-06
Total Dysregulated Proteins at Medium BPA concentrations	Anoxia	2.3996261299434025e-06
Total Dysregulated Proteins at Medium BPA concentrations	Hypoxemia	2.3996261299434025e-06
Total Dysregulated Proteins at Medium BPA concentrations	Hypothermia, natural	3.5918197891819128e-06
Total Dysregulated Proteins at Medium BPA concentrations	Schizophreniform Disorders	3.5918197891819128e-06
Total Dysregulated Proteins at Medium BPA concentrations	Psychosis, Brief Reactive	3.5918197891819128e-06
Total Dysregulated Proteins at Medium BPA concentrations	Psychoses, Substance-Induced	4.290933807765175e-06
Total Dysregulated Proteins at Medium BPA concentrations	Psychoses, Drug	4.687638717499009e-06
Total Dysregulated Proteins at Medium BPA concentrations	Bladder Neoplasm	4.787671538823369e-06
Total Dysregulated Proteins at Medium BPA concentrations	Carcinoma, Neuroendocrine	5.258673928358849e-06
Total Dysregulated Proteins at Medium BPA concentrations	Ductal Carcinoma	5.258673928358849e-06
Total Dysregulated Proteins at Medium BPA concentrations	Mammary Neoplasms	5.4206612996237135e-06
Total Dysregulated Proteins at Medium BPA concentrations	Carcinoma in situ of endometrium	5.4206612996237135e-06
Total Dysregulated Proteins at Medium BPA concentrations	Cardiac Hypertrophy	5.44593723568698e-06
Total Dysregulated Proteins at Medium BPA concentrations	Chronic active hepatitis	5.729742822076736e-06
Total Dysregulated Proteins at Medium BPA concentrations	Chronic Persistent Hepatitis	5.729742822076736e-06
Total Dysregulated Proteins at Medium BPA concentrations	Hepatitis, Chronic	5.729742822076736e-06
Total Dysregulated Proteins at Medium BPA concentrations	Cryptogenic Chronic Hepatitis	5.729742822076736e-06
Total Dysregulated Proteins at Medium BPA concentrations	Acute Cerebrovascular Accidents	6.2549475381412795e-06
Total Dysregulated Proteins at Medium BPA concentrations	Heart Failure, Right-Sided	6.913628229536414e-06
Total Dysregulated Proteins at Medium BPA concentrations	Heart Decompensation	6.913628229536414e-06
Total Dysregulated Proteins at Medium BPA concentrations	Myocardial Failure	6.913628229536414e-06
Total Dysregulated Proteins at Medium BPA concentrations	Left-Sided Heart Failure	6.913628229536414e-06
Total Dysregulated Proteins at Medium BPA concentrations	Degenerative Diseases, Central Nervous System	6.990695983620866e-06
Total Dysregulated Proteins at Medium BPA concentrations	Degenerative Diseases, Spinal Cord	6.990695983620866e-06
Total Dysregulated Proteins at Medium BPA concentrations	Neurodegenerative Disorders	6.990695983620866e-06
Total Dysregulated Proteins at Medium BPA concentrations	Ovarian Serous Adenocarcinoma	7.790389843330513e-06
Total Dysregulated Proteins at Medium BPA concentrations	Status Epilepticus, Subclinical	7.790389843330513e-06
Total Dysregulated Proteins at Medium BPA concentrations	Petit mal status	7.790389843330513e-06
Total Dysregulated Proteins at Medium BPA concentrations	Simple Partial Status Epilepticus	7.790389843330513e-06
Total Dysregulated Proteins at Medium BPA concentrations	Complex Partial Status Epilepticus	7.790389843330513e-06
Total Dysregulated Proteins at Medium BPA concentrations	Grand Mal Status Epilepticus	7.790389843330513e-06
Total Dysregulated Proteins at Medium BPA concentrations	Non-Convulsive Status Epilepticus	7.790389843330513e-06
Total Dysregulated Proteins at Medium BPA concentrations	Brain Tumor, Primary	9.50744088711987e-06
Total Dysregulated Proteins at Medium BPA concentrations	Benign neoplasm of brain, unspecified	9.50744088711987e-06
Total Dysregulated Proteins at Medium BPA concentrations	Primary malignant neoplasm of brain	9.50744088711987e-06
Total Dysregulated Proteins at Medium BPA concentrations	Chloracne	9.50744088711987e-06
Total Dysregulated Proteins at Medium BPA concentrations	Recurrent Brain Neoplasm	9.50744088711987e-06
Total Dysregulated Proteins at Medium BPA concentrations	Non-Small Cell Lung Carcinoma	1.0496477216426715e-05
Total Dysregulated Proteins at Medium BPA concentrations	Liver carcinoma	1.0619705020273274e-05
Total Dysregulated Proteins at Medium BPA concentrations	Enzymopathy	1.3351169943407265e-05
Total Dysregulated Proteins at Medium BPA concentrations	Esophageal Neoplasms	1.3351169943407265e-05
Total Dysregulated Proteins at Medium BPA concentrations	Malignant neoplasm of urinary bladder	1.3351169943407265e-05
Total Dysregulated Proteins at Medium BPA concentrations	Mammary Ductal Carcinoma	1.3351169943407265e-05
Total Dysregulated Proteins at Medium BPA concentrations	Invasive Ductal Breast Carcinoma	1.3351169943407265e-05
Total Dysregulated Proteins at Medium BPA concentrations	Glioma	1.3365031012254632e-05
Total Dysregulated Proteins at Medium BPA concentrations	Down Syndrome, Partial Trisomy 21	1.3365031012254632e-05
Total Dysregulated Proteins at Medium BPA concentrations	Down Syndrome	1.3365031012254632e-05
Total Dysregulated Proteins at Medium BPA concentrations	Trisomy 21, Meiotic Nondisjunction	1.3365031012254632e-05
Total Dysregulated Proteins at Medium BPA concentrations	Trisomy 21, Mitotic Nondisjunction	1.3365031012254632e-05
Total Dysregulated Proteins at Medium BPA concentrations	Child Development Deviations	1.5699282422848295e-05
Total Dysregulated Proteins at Medium BPA concentrations	Bilateral Wilms Tumor	1.5699282422848295e-05
Total Dysregulated Proteins at Medium BPA concentrations	Child Development Disorders, Specific	1.5699282422848295e-05
Total Dysregulated Proteins at Medium BPA concentrations	Liver diseases	1.5914695519967893e-05
Total Dysregulated Proteins at Medium BPA concentrations	Malignant neoplasm of esophagus	1.6416538722436134e-05
Total Dysregulated Proteins at Medium BPA concentrations	nervous system disorder	1.756694629364981e-05
Total Dysregulated Proteins at Medium BPA concentrations	Developmental Disabilities	2.1040581297029824e-05
Total Dysregulated Proteins at Medium BPA concentrations	Hereditary Sensory Autonomic Neuropathy, Type 2	2.3563494956665925e-05
Total Dysregulated Proteins at Medium BPA concentrations	Alzheimer's Disease	2.577127386733543e-05
Total Dysregulated Proteins at Medium BPA concentrations	Male sterility	2.671333989566886e-05
Total Dysregulated Proteins at Medium BPA concentrations	Subfertility, Male	2.671333989566886e-05
Total Dysregulated Proteins at Medium BPA concentrations	Arthritis, Adjuvant-Induced	2.689659473063007e-05
Total Dysregulated Proteins at Medium BPA concentrations	Arthritis, Experimental	2.689659473063007e-05
Total Dysregulated Proteins at Medium BPA concentrations	Arthritis, Collagen-Induced	2.689659473063007e-05
Total Dysregulated Proteins at Medium BPA concentrations	Hereditary Sensory Radicular Neuropathy	2.793685188945528e-05
Total Dysregulated Proteins at Medium BPA concentrations	Polyposis, Adenomatous Intestinal	4.301597389784096e-05
Total Dysregulated Proteins at Medium BPA concentrations	Familial Intestinal Polyposis	4.301597389784096e-05
Total Dysregulated Proteins at Medium BPA concentrations	Lateral Sclerosis	4.718814883475055e-05
Total Dysregulated Proteins at Medium BPA concentrations	Severe depression	4.718814883475055e-05
Total Dysregulated Proteins at Medium BPA concentrations	Helicobacter Infections	4.796918420885778e-05
Total Dysregulated Proteins at Medium BPA concentrations	Persistent atrial fibrillation	4.977769427067686e-05
Total Dysregulated Proteins at Medium BPA concentrations	familial atrial fibrillation	4.977769427067686e-05
Total Dysregulated Proteins at Medium BPA concentrations	Paroxysmal atrial fibrillation	4.977769427067686e-05
Total Dysregulated Proteins at Medium BPA concentrations	Motor Neuron Disease, Lower	5.215039911278919e-05
Total Dysregulated Proteins at Medium BPA concentrations	Motor Neuron Disease, Secondary	5.215039911278919e-05
Total Dysregulated Proteins at Medium BPA concentrations	Motor Neuron Disease, Upper	5.215039911278919e-05
Total Dysregulated Proteins at Medium BPA concentrations	Anterior Horn Cell Disease	5.215039911278919e-05
Total Dysregulated Proteins at Medium BPA concentrations	Familial Motor Neuron Disease	5.215039911278919e-05
Total Dysregulated Proteins at Medium BPA concentrations	Obesity	5.6114281219730335e-05
Total Dysregulated Proteins at Medium BPA concentrations	PROSTATE CANCER, HEREDITARY, 1	5.6114281219730335e-05
Total Dysregulated Proteins at Medium BPA concentrations	Squamous cell carcinoma of esophagus	6.002475704672709e-05
Total Dysregulated Proteins at Medium BPA concentrations	Hyperplasia	6.002475704672709e-05
Total Dysregulated Proteins at Medium BPA concentrations	Liver Dysfunction	6.286072230533122e-05
Total Dysregulated Proteins at Medium BPA concentrations	Carcinoma of lung	6.38008536618874e-05
Total Dysregulated Proteins at Medium BPA concentrations	Head and Neck Carcinoma	6.38008536618874e-05
Total Dysregulated Proteins at Medium BPA concentrations	Splenomegaly	6.649893928394553e-05
Total Dysregulated Proteins at Medium BPA concentrations	Learning Disturbance	7.401075613807131e-05
Total Dysregulated Proteins at Medium BPA concentrations	Aura	7.401075613807131e-05
Total Dysregulated Proteins at Medium BPA concentrations	Learning Disabilities	7.401075613807131e-05
Total Dysregulated Proteins at Medium BPA concentrations	Adult Learning Disorders	7.401075613807131e-05
Total Dysregulated Proteins at Medium BPA concentrations	Awakening Epilepsy	7.401075613807131e-05
Total Dysregulated Proteins at Medium BPA concentrations	Learning Disorders	7.401075613807131e-05
Total Dysregulated Proteins at Medium BPA concentrations	Epilepsy, Cryptogenic	7.401075613807131e-05
Total Dysregulated Proteins at Medium BPA concentrations	Developmental Academic Disorder	7.401075613807131e-05
Total Dysregulated Proteins at Medium BPA concentrations	Arsenic Encephalopathy	7.845889709489193e-05
Total Dysregulated Proteins at Medium BPA concentrations	Arsenic Poisoning, Inorganic	7.845889709489193e-05
Total Dysregulated Proteins at Medium BPA concentrations	Nervous System, Organic Arsenic Poisoning	7.845889709489193e-05
Total Dysregulated Proteins at Medium BPA concentrations	Arsenic Induced Polyneuropathy	7.845889709489193e-05
Total Dysregulated Proteins at Medium BPA concentrations	Arsenic Poisoning	7.845889709489193e-05
Total Dysregulated Proteins at Medium BPA concentrations	Bright Disease	8.319448570903989e-05
Total Dysregulated Proteins at Medium BPA concentrations	Cardiomyopathy, Dilated	8.319448570903989e-05
Total Dysregulated Proteins at Medium BPA concentrations	Chromosome Breakage	8.319448570903989e-05
Total Dysregulated Proteins at Medium BPA concentrations	Chromosome Breaks	8.319448570903989e-05
Total Dysregulated Proteins at Medium BPA concentrations	Gait, Unsteady	8.319448570903989e-05
Total Dysregulated Proteins at Medium BPA concentrations	Malignant neoplasm of pancreas	8.454655152238713e-05
Total Dysregulated Proteins at Medium BPA concentrations	Familial Atypical Mole Melanoma Syndrome	8.454655152238713e-05
Total Dysregulated Proteins at Medium BPA concentrations	Adrenal Cancer	8.454655152238713e-05
Total Dysregulated Proteins at Medium BPA concentrations	Adrenal Gland Neoplasms	8.454655152238713e-05
Total Dysregulated Proteins at Medium BPA concentrations	Cognition Disorders	8.795661214633637e-05
Total Dysregulated Proteins at Medium BPA concentrations	Ureteral Calculi	8.820085650808931e-05
Total Dysregulated Proteins at Medium BPA concentrations	Primary Hyperthyroidism	8.852494844020011e-05
Total Dysregulated Proteins at Medium BPA concentrations	Parkinsonian Disorders	8.987533515907405e-05
Total Dysregulated Proteins at Medium BPA concentrations	Intestinal Cancer	8.987533515907405e-05
Total Dysregulated Proteins at Medium BPA concentrations	Intestinal Neoplasms	8.987533515907405e-05
Total Dysregulated Proteins at Medium BPA concentrations	Familial Dementia	9.108552565005126e-05
Total Dysregulated Proteins at Medium BPA concentrations	Senile Paranoid Dementia	9.108552565005126e-05
Total Dysregulated Proteins at Medium BPA concentrations	Stomach Neoplasms	9.136892615417486e-05
Total Dysregulated Proteins at Medium BPA concentrations	Benign tumor of pancreas	9.136892615417486e-05
Total Dysregulated Proteins at Medium BPA concentrations	Rectal Neoplasms	9.136892615417486e-05
Total Dysregulated Proteins at Medium BPA concentrations	Cancer of Neck	0.00010317334112832285
Total Dysregulated Proteins at Medium BPA concentrations	Neck Neoplasms	0.00010317334112832285
Total Dysregulated Proteins at Medium BPA concentrations	Acute kidney injury	0.00010606157570810578
Total Dysregulated Proteins at Medium BPA concentrations	Benign Neoplasm	0.00010641355605426082
Total Dysregulated Proteins at Medium BPA concentrations	Intravascular hemolysis	0.00010679612312357916
Total Dysregulated Proteins at Medium BPA concentrations	Asphyxia Neonatorum	0.00010679612312357916
Total Dysregulated Proteins at Medium BPA concentrations	Carcinoma in situ of esophagus	0.00010679612312357916
Total Dysregulated Proteins at Medium BPA concentrations	Hemolysis (disorder)	0.00010679612312357916
Total Dysregulated Proteins at Medium BPA concentrations	gliosarcoma	0.00010679612312357916
Total Dysregulated Proteins at Medium BPA concentrations	Brain Neoplasms	0.00010679612312357916
Total Dysregulated Proteins at Medium BPA concentrations	Benign neoplasm of esophagus	0.00010679612312357916
Total Dysregulated Proteins at Medium BPA concentrations	Extravascular Hemolysis	0.00010679612312357916
Total Dysregulated Proteins at Medium BPA concentrations	Urticaria	0.00010679612312357916
Total Dysregulated Proteins at Medium BPA concentrations	Cannabis Dependence	0.00010842221577534888
Total Dysregulated Proteins at Medium BPA concentrations	Parkinson Disease	0.00010842221577534888
Total Dysregulated Proteins at Medium BPA concentrations	Cancer of Head	0.0001165009440637632
Total Dysregulated Proteins at Medium BPA concentrations	Head Neoplasms	0.0001165009440637632
Total Dysregulated Proteins at Medium BPA concentrations	Upper Aerodigestive Tract Neoplasms	0.0001165009440637632
Total Dysregulated Proteins at Medium BPA concentrations	Inherited neuropathies	0.00012823709239122492
Total Dysregulated Proteins at Medium BPA concentrations	Gait, Widebased	0.00013449443037376457
Total Dysregulated Proteins at Medium BPA concentrations	Hepatoblastoma	0.00013449443037376457
Total Dysregulated Proteins at Medium BPA concentrations	Gait, Festinating	0.00013449443037376457
Total Dysregulated Proteins at Medium BPA concentrations	Gait, Frontal	0.00013449443037376457
Total Dysregulated Proteins at Medium BPA concentrations	Hyperthyroidism	0.00013449443037376457
Total Dysregulated Proteins at Medium BPA concentrations	Adult Diffuse Large B-Cell Lymphoma	0.00013449443037376457
Total Dysregulated Proteins at Medium BPA concentrations	Charcot Gait	0.00013449443037376457
Total Dysregulated Proteins at Medium BPA concentrations	Intestinal Polyps	0.00013449443037376457
Total Dysregulated Proteins at Medium BPA concentrations	Gait, Scissors	0.00013449443037376457
Total Dysregulated Proteins at Medium BPA concentrations	Endometrial adenocarcinoma	0.00013449443037376457
Total Dysregulated Proteins at Medium BPA concentrations	Gait, Hemiplegic	0.00013449443037376457
Total Dysregulated Proteins at Medium BPA concentrations	Cerebellar ataxic gait	0.00013449443037376457
Total Dysregulated Proteins at Medium BPA concentrations	Bonnevie-Ullrich Syndrome	0.00013449443037376457
Total Dysregulated Proteins at Medium BPA concentrations	Female Urogenital Diseases	0.00013449443037376457
Total Dysregulated Proteins at Medium BPA concentrations	Dyskeratosis Congenita	0.00013449443037376457
Total Dysregulated Proteins at Medium BPA concentrations	Gonadal Dysgenesis, 45,X	0.00013449443037376457
Total Dysregulated Proteins at Medium BPA concentrations	Gait, Broadened	0.00013449443037376457
Total Dysregulated Proteins at Medium BPA concentrations	Bone Diseases	0.00013449443037376457
Total Dysregulated Proteins at Medium BPA concentrations	Waddling gait	0.00013449443037376457
Total Dysregulated Proteins at Medium BPA concentrations	Gait, Hysterical	0.00013449443037376457
Total Dysregulated Proteins at Medium BPA concentrations	Gait, Shuffling	0.00013449443037376457
Total Dysregulated Proteins at Medium BPA concentrations	Gait, Drop Foot	0.00013449443037376457
Total Dysregulated Proteins at Medium BPA concentrations	Gait, Rigid	0.00013449443037376457
Total Dysregulated Proteins at Medium BPA concentrations	Gait Disorder, Sensorimotor	0.00013449443037376457
Total Dysregulated Proteins at Medium BPA concentrations	gallbladder neoplasm	0.00013449443037376457
Total Dysregulated Proteins at Medium BPA concentrations	Gait, Stumbling	0.00013449443037376457
Total Dysregulated Proteins at Medium BPA concentrations	Malignant neoplasm of gallbladder	0.00013449443037376457
Total Dysregulated Proteins at Medium BPA concentrations	Spastic gait	0.00013449443037376457
Total Dysregulated Proteins at Medium BPA concentrations	Marche a Petit Pas	0.00013449443037376457
Total Dysregulated Proteins at Medium BPA concentrations	Gait Disorders, Neurologic	0.00013449443037376457
Total Dysregulated Proteins at Medium BPA concentrations	Gait, Athetotic	0.00013449443037376457
Total Dysregulated Proteins at Medium BPA concentrations	Turner Syndrome	0.00013449443037376457
Total Dysregulated Proteins at Medium BPA concentrations	Rapid Fatigue of Gait	0.00013449443037376457
Total Dysregulated Proteins at Medium BPA concentrations	Granulomatous Slack Skin	0.00013616148370322392
Total Dysregulated Proteins at Medium BPA concentrations	Biliary Cirrhosis, Primary, 1	0.0001677645376001895
Total Dysregulated Proteins at Medium BPA concentrations	Squamous cell carcinoma	0.0001677645376001895
Total Dysregulated Proteins at Medium BPA concentrations	Cleft palate with cleft lip	0.0001677645376001895
Total Dysregulated Proteins at Medium BPA concentrations	Pancreatic Neoplasm	0.0001677645376001895
Total Dysregulated Proteins at Medium BPA concentrations	Carcinoma, Pancreatic Ductal	0.0001677645376001895
Total Dysregulated Proteins at Medium BPA concentrations	Hemicrania migraine	0.0001677645376001895
Total Dysregulated Proteins at Medium BPA concentrations	Acute Confusional Migraine	0.0001677645376001895
Total Dysregulated Proteins at Medium BPA concentrations	Secondary Biliary Cholangitis	0.0001677645376001895
Total Dysregulated Proteins at Medium BPA concentrations	Frontotemporal dementia	0.0001677645376001895
Total Dysregulated Proteins at Medium BPA concentrations	Status Migrainosus	0.0001677645376001895
Total Dysregulated Proteins at Medium BPA concentrations	Lymphoma, T-Cell, Cutaneous	0.0001677645376001895
Total Dysregulated Proteins at Medium BPA concentrations	Dementia	0.0001677645376001895
Total Dysregulated Proteins at Medium BPA concentrations	Sick Headaches	0.0001677645376001895
Total Dysregulated Proteins at Medium BPA concentrations	Cervical Migraine Syndrome	0.0001677645376001895
Total Dysregulated Proteins at Medium BPA concentrations	Abdominal Migraine	0.0001677645376001895
Total Dysregulated Proteins at Medium BPA concentrations	Gastric Adenocarcinoma	0.0001719375766127223
Total Dysregulated Proteins at Medium BPA concentrations	Complications of Diabetes Mellitus	0.0001719375766127223
Total Dysregulated Proteins at Medium BPA concentrations	Papillary Meningioma	0.00017557949063638515
Total Dysregulated Proteins at Medium BPA concentrations	Olfactory Groove Meningioma	0.00017557949063638515
Total Dysregulated Proteins at Medium BPA concentrations	Sphenoid Wing Meningioma	0.00017557949063638515
Total Dysregulated Proteins at Medium BPA concentrations	Meningiomas, Multiple	0.00017557949063638515
Total Dysregulated Proteins at Medium BPA concentrations	Microcystic meningioma	0.00017557949063638515
Total Dysregulated Proteins at Medium BPA concentrations	Secretory meningioma	0.00017557949063638515
Total Dysregulated Proteins at Medium BPA concentrations	Fibrous Meningioma	0.00017557949063638515
Total Dysregulated Proteins at Medium BPA concentrations	Xanthomatous Meningioma	0.00017557949063638515
Total Dysregulated Proteins at Medium BPA concentrations	Intraventricular Meningioma	0.00017557949063638515
Total Dysregulated Proteins at Medium BPA concentrations	Mouth Diseases	0.00017557949063638515
Total Dysregulated Proteins at Medium BPA concentrations	Carcinogenesis	0.00017557949063638515
Total Dysregulated Proteins at Medium BPA concentrations	Cerebral Convexity Meningioma	0.00017557949063638515
Total Dysregulated Proteins at Medium BPA concentrations	Spinal Meningioma	0.00017557949063638515
Total Dysregulated Proteins at Medium BPA concentrations	Psammomatous Meningioma	0.00017557949063638515
Total Dysregulated Proteins at Medium BPA concentrations	Papilloma, Squamous Cell	0.00017557949063638515
Total Dysregulated Proteins at Medium BPA concentrations	Hemangioblastic Meningioma	0.00017557949063638515
Total Dysregulated Proteins at Medium BPA concentrations	Meningothelial meningioma	0.00017557949063638515
Total Dysregulated Proteins at Medium BPA concentrations	Angioblastic Meningioma	0.00017557949063638515
Total Dysregulated Proteins at Medium BPA concentrations	Papillomatosis	0.00017557949063638515
Total Dysregulated Proteins at Medium BPA concentrations	Benign Meningioma	0.00017557949063638515
Total Dysregulated Proteins at Medium BPA concentrations	Parasagittal Meningioma	0.00017557949063638515
Total Dysregulated Proteins at Medium BPA concentrations	Angiomatous Meningioma	0.00017557949063638515
Total Dysregulated Proteins at Medium BPA concentrations	Transitional Meningioma	0.00017557949063638515
Total Dysregulated Proteins at Medium BPA concentrations	Posterior Fossa Meningioma	0.00017557949063638515
Total Dysregulated Proteins at Medium BPA concentrations	Clear Cell Meningioma	0.00017557949063638515
Total Dysregulated Proteins at Medium BPA concentrations	Intraorbital Meningioma	0.00017557949063638515
Total Dysregulated Proteins at Medium BPA concentrations	Hemangiopericytic Meningioma	0.00017557949063638515
Total Dysregulated Proteins at Medium BPA concentrations	Malignant Meningioma	0.00017557949063638515
Total Dysregulated Proteins at Medium BPA concentrations	Intracranial Meningioma	0.00017557949063638515
Total Dysregulated Proteins at Medium BPA concentrations	Acquired Meningomyelocele	0.000215434324970018
Total Dysregulated Proteins at Medium BPA concentrations	Meningomyelocele	0.000215434324970018
Total Dysregulated Proteins at Medium BPA concentrations	Iron deficiency anemia	0.000215434324970018
Total Dysregulated Proteins at Medium BPA concentrations	Myelocele	0.000215434324970018
Total Dysregulated Proteins at Medium BPA concentrations	Synovitis, Acne, Pustulosis, Hyperostosis, and Osteitis Syndrome	0.00021974478873436514
Total Dysregulated Proteins at Medium BPA concentrations	Malignant neoplasm of stomach	0.00022414171115458414
Total Dysregulated Proteins at Medium BPA concentrations	Carcinoma of Endocrine Gland	0.00022414171115458414
Total Dysregulated Proteins at Medium BPA concentrations	Salivary Gland Neoplasms	0.0002466914459963208
Total Dysregulated Proteins at Medium BPA concentrations	Astrocytosis	0.0002522103092503417
Total Dysregulated Proteins at Medium BPA concentrations	Gliosis	0.0002522103092503417
Total Dysregulated Proteins at Medium BPA concentrations	Neoplasm of uncertain or unknown behavior of stomach	0.0002522103092503417
Total Dysregulated Proteins at Medium BPA concentrations	Benign neoplasm of stomach	0.0002522103092503417
Total Dysregulated Proteins at Medium BPA concentrations	Carcinoma in situ of stomach	0.0002522103092503417
Total Dysregulated Proteins at Medium BPA concentrations	Lymphatic Metastasis	0.00025801005275073155
Total Dysregulated Proteins at Medium BPA concentrations	Brain Diseases	0.00025801005275073155
Total Dysregulated Proteins at Medium BPA concentrations	Peritoneal Neoplasms	0.00026163454449108856
Total Dysregulated Proteins at Medium BPA concentrations	Carcinomatosis of peritoneal cavity	0.00026163454449108856
Total Dysregulated Proteins at Medium BPA concentrations	Protein Deficiency	0.00026540830808375677
Total Dysregulated Proteins at Medium BPA concentrations	Intestinal schistosomiasis	0.00026540830808375677
Total Dysregulated Proteins at Medium BPA concentrations	Memory impairment	0.00026540830808375677
Total Dysregulated Proteins at Medium BPA concentrations	Schistosomiasis mansoni	0.00026540830808375677
Total Dysregulated Proteins at Medium BPA concentrations	Alcoholic Intoxication	0.000266073331478308
Total Dysregulated Proteins at Medium BPA concentrations	Lens Opacities	0.0002905475204240569
Total Dysregulated Proteins at Medium BPA concentrations	Pseudoaphakia	0.0002905475204240569
Total Dysregulated Proteins at Medium BPA concentrations	Uveoretinal Coloboma	0.00030509245399377966
Total Dysregulated Proteins at Medium BPA concentrations	Stomach Carcinoma	0.00032738681285277623
Total Dysregulated Proteins at Medium BPA concentrations	Fibroid Tumor	0.00032738681285277623
Total Dysregulated Proteins at Medium BPA concentrations	Aortic Diseases	0.00032738681285277623
Total Dysregulated Proteins at Medium BPA concentrations	Squamous cell carcinoma of the head and neck	0.00032738681285277623
Total Dysregulated Proteins at Medium BPA concentrations	Behavioral variant of frontotemporal dementia	0.000332959396611072
Total Dysregulated Proteins at Medium BPA concentrations	Nephritis	0.000332959396611072
Total Dysregulated Proteins at Medium BPA concentrations	Nasopharyngeal Neoplasms	0.000332959396611072
Total Dysregulated Proteins at Medium BPA concentrations	Pancreatic carcinoma, familial	0.000332959396611072
Total Dysregulated Proteins at Medium BPA concentrations	Small Lymphocytic Lymphoma	0.000332959396611072
Total Dysregulated Proteins at Medium BPA concentrations	Left Ventricle Remodeling	0.00036099322463923423
Total Dysregulated Proteins at Medium BPA concentrations	Glioblastoma	0.00036099322463923423
Total Dysregulated Proteins at Medium BPA concentrations	Heart failure	0.00036099322463923423
Total Dysregulated Proteins at Medium BPA concentrations	Inflammation	0.00036099322463923423
Total Dysregulated Proteins at Medium BPA concentrations	Ventricular Remodeling	0.00036099322463923423
Total Dysregulated Proteins at Medium BPA concentrations	Seizures	0.0003655722681430093
Total Dysregulated Proteins at Medium BPA concentrations	Diabetic Nephropathy	0.0003655722681430093
Total Dysregulated Proteins at Medium BPA concentrations	Middle Cerebral Artery Thrombosis	0.00038533791996079274
Total Dysregulated Proteins at Medium BPA concentrations	Middle Cerebral Artery Occlusion	0.00038533791996079274
Total Dysregulated Proteins at Medium BPA concentrations	Insulin Sensitivity	0.00038533791996079274
Total Dysregulated Proteins at Medium BPA concentrations	Left Middle Cerebral Artery Infarction	0.00038533791996079274
Total Dysregulated Proteins at Medium BPA concentrations	Middle Cerebral Artery Syndrome	0.00038533791996079274
Total Dysregulated Proteins at Medium BPA concentrations	Right Middle Cerebral Artery Infarction	0.00038533791996079274
Total Dysregulated Proteins at Medium BPA concentrations	Embolic Infarction, Middle Cerebral Artery	0.00038533791996079274
Total Dysregulated Proteins at Medium BPA concentrations	Middle Cerebral Artery Embolus	0.00038533791996079274
Total Dysregulated Proteins at Medium BPA concentrations	Thrombotic Infarction, Middle Cerebral Artery	0.00038533791996079274
Total Dysregulated Proteins at Medium BPA concentrations	Manic	0.00040018903919071227
Total Dysregulated Proteins at Medium BPA concentrations	Oligospermia	0.0004027299046626132
Total Dysregulated Proteins at Medium BPA concentrations	Malignant tumor of colon	0.0004027299046626132
Total Dysregulated Proteins at Medium BPA concentrations	Leukemia, Myelocytic, Acute	0.0004081910415180466
Total Dysregulated Proteins at Medium BPA concentrations	Alcoholic Steatohepatitis	0.0004115364114219819
Total Dysregulated Proteins at Medium BPA concentrations	Shared Paranoid Disorder	0.0004115364114219819
Total Dysregulated Proteins at Medium BPA concentrations	Manganese Poisoning	0.0004142703119068853
Total Dysregulated Proteins at Medium BPA concentrations	Encephalopathies	0.00041674877288629776
Total Dysregulated Proteins at Medium BPA concentrations	Crohn's disease of the ileum	0.0004226268273761906
Total Dysregulated Proteins at Medium BPA concentrations	Regional enteritis	0.0004226268273761906
Total Dysregulated Proteins at Medium BPA concentrations	IIeocolitis	0.0004226268273761906
Total Dysregulated Proteins at Medium BPA concentrations	Congestive heart failure	0.0004293560251044208
Total Dysregulated Proteins at Medium BPA concentrations	Paranoid Schizophrenia	0.0004391317533399843
Total Dysregulated Proteins at Medium BPA concentrations	Malignant neoplasm of salivary gland	0.00049921917862687
Total Dysregulated Proteins at Medium BPA concentrations	Cannabis-Related Disorder	0.0005631345328066418
Total Dysregulated Proteins at Medium BPA concentrations	Hashish Abuse	0.0005631345328066418
Total Dysregulated Proteins at Medium BPA concentrations	Cannabis Abuse	0.0005631345328066418
Total Dysregulated Proteins at Medium BPA concentrations	Cranioschisis	0.0005631345328066418
Total Dysregulated Proteins at Medium BPA concentrations	Congenital neurologic anomalies	0.0005631345328066418
Total Dysregulated Proteins at Medium BPA concentrations	Melanoma, Harding-Passey	0.0005723194536625218
Total Dysregulated Proteins at Medium BPA concentrations	Glioblastoma Multiforme	0.0005723194536625218
Total Dysregulated Proteins at Medium BPA concentrations	Anhedonia	0.0005723194536625218
Total Dysregulated Proteins at Medium BPA concentrations	Melanoma, B16	0.0005723194536625218
Total Dysregulated Proteins at Medium BPA concentrations	Melanoma, Cloudman S91	0.0005723194536625218
Total Dysregulated Proteins at Medium BPA concentrations	Thyroid carcinoma	0.0005723194536625218
Total Dysregulated Proteins at Medium BPA concentrations	Melanoma, Experimental	0.0005723194536625218
Total Dysregulated Proteins at Medium BPA concentrations	Adult only	0.0005812207369539268
Total Dysregulated Proteins at Medium BPA concentrations	Malignant Neoplasms	0.0005812207369539268
Total Dysregulated Proteins at Medium BPA concentrations	Neoplasms	0.0005812207369539268
Total Dysregulated Proteins at Medium BPA concentrations	MYOCARDIAL INFARCTION, SUSCEPTIBILITY TO	0.0005812207369539268
Total Dysregulated Proteins at Medium BPA concentrations	Familial intrahepatic cholestasis of pregnancy	0.0005816266039451787
Total Dysregulated Proteins at Medium BPA concentrations	Meningioma	0.0005816266039451787
Total Dysregulated Proteins at Medium BPA concentrations	Inborn Errors of Metabolism	0.0005816266039451787
Total Dysregulated Proteins at Medium BPA concentrations	Adult T-Cell Lymphoma/Leukemia	0.0006157806602776102
Total Dysregulated Proteins at Medium BPA concentrations	Acute erythroleukemia - M6a subtype	0.0006216818160872942
Total Dysregulated Proteins at Medium BPA concentrations	Primary Progressive Nonfluent Aphasia	0.0006216818160872942
Total Dysregulated Proteins at Medium BPA concentrations	Acute myeloid leukemia FAB-M6	0.0006216818160872942
Total Dysregulated Proteins at Medium BPA concentrations	Leber Congenital Amaurosis	0.0006216818160872942
Total Dysregulated Proteins at Medium BPA concentrations	Acute erythroleukemia - M6b subtype	0.0006216818160872942
Total Dysregulated Proteins at Medium BPA concentrations	Acute erythroleukemia	0.0006216818160872942
Total Dysregulated Proteins at Medium BPA concentrations	Eperythrozoonosis	0.0006271733596312324
Total Dysregulated Proteins at Medium BPA concentrations	Mycoplasma Infections	0.0006271733596312324
Total Dysregulated Proteins at Medium BPA concentrations	Musculoskeletal Pain	0.0006271733596312324
Total Dysregulated Proteins at Medium BPA concentrations	Coronary Arteriosclerosis	0.0006271733596312324
Total Dysregulated Proteins at Medium BPA concentrations	Esophageal carcinoma	0.0006271733596312324
Total Dysregulated Proteins at Medium BPA concentrations	Ovarian Carcinoma	0.0006331758557107953
Total Dysregulated Proteins at Medium BPA concentrations	Lipoidosis	0.0006394328632256331
Total Dysregulated Proteins at Medium BPA concentrations	Cancer of Nasopharynx	0.0006532223300531111
Total Dysregulated Proteins at Medium BPA concentrations	Chronic Lymphocytic Leukemia	0.0006532223300531111
Total Dysregulated Proteins at Medium BPA concentrations	Pyemia	0.0007680537975200414
Total Dysregulated Proteins at Medium BPA concentrations	Ureteral obstruction	0.0007680537975200414
Total Dysregulated Proteins at Medium BPA concentrations	Severe Sepsis	0.0007680537975200414
Total Dysregulated Proteins at Medium BPA concentrations	Septicemia	0.0007680537975200414
Total Dysregulated Proteins at Medium BPA concentrations	Disproportionate short stature	0.0007683185655573148
Total Dysregulated Proteins at Medium BPA concentrations	Nephroblastoma	0.0007749041047169324
Total Dysregulated Proteins at Medium BPA concentrations	Giant Cell Glioblastoma	0.0009692663656107977
Total Dysregulated Proteins at Medium BPA concentrations	Hereditary Breast and Ovarian Cancer Syndrome	0.0009692663656107977
Total Dysregulated Proteins at Medium BPA concentrations	Bile duct carcinoma	0.0009978020549591406
Total Dysregulated Proteins at Medium BPA concentrations	Adrenocortical carcinoma	0.0009978020549591406
Total Dysregulated Proteins at Medium BPA concentrations	Acute schizophrenia	0.0009978020549591406
Total Dysregulated Proteins at Medium BPA concentrations	Malignant neoplasm of liver	0.0010042244271645895
Total Dysregulated Proteins at Medium BPA concentrations	Nonepileptic Seizures	0.0010042244271645895
Total Dysregulated Proteins at Medium BPA concentrations	Visual seizure	0.0010042244271645895
Total Dysregulated Proteins at Medium BPA concentrations	Seizures, Auditory	0.0010042244271645895
Total Dysregulated Proteins at Medium BPA concentrations	Gustatory seizure	0.0010042244271645895
Total Dysregulated Proteins at Medium BPA concentrations	Non-epileptic convulsion	0.0010042244271645895
Total Dysregulated Proteins at Medium BPA concentrations	Olfactory seizure	0.0010042244271645895
Total Dysregulated Proteins at Medium BPA concentrations	Atonic Absence Seizures	0.0010042244271645895
Total Dysregulated Proteins at Medium BPA concentrations	Complex partial seizures	0.0010042244271645895
Total Dysregulated Proteins at Medium BPA concentrations	Convulsive Seizures	0.0010042244271645895
Total Dysregulated Proteins at Medium BPA concentrations	Generalized seizures	0.0010042244271645895
Total Dysregulated Proteins at Medium BPA concentrations	Seizures, Somatosensory	0.0010042244271645895
Total Dysregulated Proteins at Medium BPA concentrations	Seizures, Sensory	0.0010042244271645895
Total Dysregulated Proteins at Medium BPA concentrations	Generalized Absence Seizures	0.0010042244271645895
Total Dysregulated Proteins at Medium BPA concentrations	Clonic Seizures	0.0010042244271645895
Total Dysregulated Proteins at Medium BPA concentrations	Epileptic Seizures	0.0010042244271645895
Total Dysregulated Proteins at Medium BPA concentrations	Epileptic drop attack	0.0010042244271645895
Total Dysregulated Proteins at Medium BPA concentrations	Liver neoplasms	0.0010042244271645895
Total Dysregulated Proteins at Medium BPA concentrations	Jacksonian Seizure	0.0010042244271645895
Total Dysregulated Proteins at Medium BPA concentrations	Vertiginous seizure	0.0010042244271645895
Total Dysregulated Proteins at Medium BPA concentrations	Single Seizure	0.0010042244271645895
Total Dysregulated Proteins at Medium BPA concentrations	Ophthalmoplegia, Progressive Supranuclear	0.0010150434821103054
Total Dysregulated Proteins at Medium BPA concentrations	PULMONARY HYPERTENSION, PRIMARY, DEXFENFLURAMINE-ASSOCIATED	0.0010278414892577574
Total Dysregulated Proteins at Medium BPA concentrations	Congenital Fiber Type Disproportion	0.0010278414892577574
Total Dysregulated Proteins at Medium BPA concentrations	Convulsions	0.0010278414892577574
Total Dysregulated Proteins at Medium BPA concentrations	Tonic Seizures	0.0010278414892577574
Total Dysregulated Proteins at Medium BPA concentrations	Absence Seizures	0.0010278414892577574
Total Dysregulated Proteins at Medium BPA concentrations	Pulmonary Hypertension, Primary, Fenfluramine-Associated	0.0010278414892577574
Total Dysregulated Proteins at Medium BPA concentrations	Pulmonary Hypertension, Primary, 1, With Hereditary Hemorrhagic Telangiectasia	0.0010278414892577574
Total Dysregulated Proteins at Medium BPA concentrations	Acute monocytic leukemia	0.0010337790587114078
Total Dysregulated Proteins at Medium BPA concentrations	Pancreatitis	0.0010561921041000776
Total Dysregulated Proteins at Medium BPA concentrations	Myoclonic Seizures	0.0010999533245941414
Total Dysregulated Proteins at Medium BPA concentrations	Tonic - clonic seizures	0.0010999533245941414
Total Dysregulated Proteins at Medium BPA concentrations	Seizures, Focal	0.0010999533245941414
Total Dysregulated Proteins at Medium BPA concentrations	Malignant neoplasm of tongue	0.00111381722144939
Total Dysregulated Proteins at Medium BPA concentrations	Tongue Neoplasms	0.00111381722144939
Total Dysregulated Proteins at Medium BPA concentrations	Atrophic	0.00111381722144939
Total Dysregulated Proteins at Medium BPA concentrations	Cutaneous Melanoma	0.0011669085546964651
Total Dysregulated Proteins at Medium BPA concentrations	Pituitary Neoplasms	0.0011669085546964651
Total Dysregulated Proteins at Medium BPA concentrations	Multiple Myeloma	0.0011669085546964651
Total Dysregulated Proteins at Medium BPA concentrations	Multiple congenital anomalies	0.0012132272624098936
Total Dysregulated Proteins at Medium BPA concentrations	Cholestasis	0.001271874436233071
Total Dysregulated Proteins at Medium BPA concentrations	Renal dysplasia and retinal aplasia (disorder)	0.001271874436233071
Total Dysregulated Proteins at Medium BPA concentrations	Colon Carcinoma	0.001271874436233071
Total Dysregulated Proteins at Medium BPA concentrations	Adult Hepatocellular Carcinoma	0.001271874436233071
Total Dysregulated Proteins at Medium BPA concentrations	MENTAL RETARDATION, AUTOSOMAL DOMINANT 40	0.001271874436233071
Total Dysregulated Proteins at Medium BPA concentrations	Mental deterioration	0.001271874436233071
Total Dysregulated Proteins at Medium BPA concentrations	Mild cognitive disorder	0.001271874436233071
Total Dysregulated Proteins at Medium BPA concentrations	Chemical and Drug Induced Liver Injury	0.0013373346470892762
Total Dysregulated Proteins at Medium BPA concentrations	Autosome Abnormalities	0.0013373346470892762
Total Dysregulated Proteins at Medium BPA concentrations	Chromosome Aberrations	0.0013373346470892762
Total Dysregulated Proteins at Medium BPA concentrations	Cadmium poisoning	0.001448349073091551
Total Dysregulated Proteins at Medium BPA concentrations	FRAXA Syndrome	0.001448349073091551
Total Dysregulated Proteins at Medium BPA concentrations	Osteosarcoma	0.001476302387651325
Total Dysregulated Proteins at Medium BPA concentrations	Malignant neoplasm of cecum	0.001476302387651325
Total Dysregulated Proteins at Medium BPA concentrations	Acute recurrent pancreatitis	0.001476302387651325
Total Dysregulated Proteins at Medium BPA concentrations	Adrenal Cortical Adenoma	0.001476302387651325
Total Dysregulated Proteins at Medium BPA concentrations	Cecal Neoplasms	0.001476302387651325
Total Dysregulated Proteins at Medium BPA concentrations	Epileptic encephalopathy	0.001581832748629822
Total Dysregulated Proteins at Medium BPA concentrations	Schwannomatosis, Plexiform	0.0017631378533901074
Total Dysregulated Proteins at Medium BPA concentrations	GLIOMA SUSCEPTIBILITY 1	0.0017631378533901074
Total Dysregulated Proteins at Medium BPA concentrations	Pituitary carcinoma	0.0017631378533901074
Total Dysregulated Proteins at Medium BPA concentrations	Gastrointestinal Stromal Tumors	0.0017631378533901074
Total Dysregulated Proteins at Medium BPA concentrations	Sinusitis	0.0017631378533901074
Total Dysregulated Proteins at Medium BPA concentrations	Hereditary pancreatitis	0.0017631378533901074
Total Dysregulated Proteins at Medium BPA concentrations	Acidosis, Lactic	0.0017631378533901074
Total Dysregulated Proteins at Medium BPA concentrations	Autosomal Dominant Hereditary Pancreatitis	0.0017631378533901074
Total Dysregulated Proteins at Medium BPA concentrations	Pancreatitis, Chronic	0.0017631378533901074
Total Dysregulated Proteins at Medium BPA concentrations	Leukemia, Monocytic, Chronic	0.0018219475542835238
Total Dysregulated Proteins at Medium BPA concentrations	Mental deficiency	0.0018219475542835238
Total Dysregulated Proteins at Medium BPA concentrations	Myeloid Leukemia	0.0018219475542835238
Total Dysregulated Proteins at Medium BPA concentrations	Fanconi Anemia	0.0018219475542835238
Total Dysregulated Proteins at Medium BPA concentrations	Profound Mental Retardation	0.0018219475542835238
Total Dysregulated Proteins at Medium BPA concentrations	Mental Retardation, Psychosocial	0.0018219475542835238
Total Dysregulated Proteins at Medium BPA concentrations	Secondary Trigeminal Neuralgia	0.0018219475542835238
Total Dysregulated Proteins at Medium BPA concentrations	Trigeminal Neuralgia, Idiopathic	0.0018219475542835238
Total Dysregulated Proteins at Medium BPA concentrations	Trigeminal Neuralgia	0.0018219475542835238
Total Dysregulated Proteins at Medium BPA concentrations	Pulmonary Fibrosis - from Asbestos Exposure	0.0021086433942481136
Total Dysregulated Proteins at Medium BPA concentrations	Microsatellite Instability	0.0021086433942481136
Total Dysregulated Proteins at Medium BPA concentrations	Left ventricular noncompaction	0.0021086433942481136
Total Dysregulated Proteins at Medium BPA concentrations	Replication Error Phenotype	0.0021086433942481136
Total Dysregulated Proteins at Medium BPA concentrations	Aberrant Crypt Foci	0.002165001699235687
Total Dysregulated Proteins at Medium BPA concentrations	INCLUSION BODY MYOPATHY WITH EARLY-ONSET PAGET DISEASE AND FRONTOTEMPORAL DEMENTIA	0.002165001699235687
Total Dysregulated Proteins at Medium BPA concentrations	Spinal Cord Diseases	0.002165001699235687
Total Dysregulated Proteins at Medium BPA concentrations	No-Reflow Phenomenon	0.002165001699235687
Total Dysregulated Proteins at Medium BPA concentrations	Slow-Flow Phenomenon	0.002165001699235687
Total Dysregulated Proteins at Medium BPA concentrations	Acute Myeloid Leukemia (AML-M2)	0.002165001699235687
Total Dysregulated Proteins at Medium BPA concentrations	Acute Promyelocytic Leukemia	0.0021693326415333815
Total Dysregulated Proteins at Medium BPA concentrations	Cancer of Urinary Tract	0.0021693326415333815
Total Dysregulated Proteins at Medium BPA concentrations	Pheochromocytoma	0.0021693326415333815
Total Dysregulated Proteins at Medium BPA concentrations	Urologic Neoplasms	0.0021693326415333815
Total Dysregulated Proteins at Medium BPA concentrations	Chromosomal Instability	0.0021693326415333815
Total Dysregulated Proteins at Medium BPA concentrations	Lymphoid leukemia	0.0021693326415333815
Total Dysregulated Proteins at Medium BPA concentrations	Pain, Crushing	0.002201467629583332
Total Dysregulated Proteins at Medium BPA concentrations	Pain, Burning	0.002201467629583332
Total Dysregulated Proteins at Medium BPA concentrations	Suffering, Physical	0.002201467629583332
Total Dysregulated Proteins at Medium BPA concentrations	Radiating pain	0.002201467629583332
Total Dysregulated Proteins at Medium BPA concentrations	Pain, Splitting	0.002201467629583332
Total Dysregulated Proteins at Medium BPA concentrations	Pain, Migratory	0.002201467629583332
Total Dysregulated Proteins at Medium BPA concentrations	Ache	0.002201467629583332
Total Dysregulated Proteins at Medium BPA concentrations	Medulloblastoma	0.0022111238738240753
Total Dysregulated Proteins at Medium BPA concentrations	Nonorganic psychosis	0.0022472957240865276
Total Dysregulated Proteins at Medium BPA concentrations	Ischemic stroke	0.0022784231439255897
Total Dysregulated Proteins at Medium BPA concentrations	Cystic Fibrosis	0.0022784231439255897
Total Dysregulated Proteins at Medium BPA concentrations	Malignant neoplasm of kidney	0.0022784231439255897
Total Dysregulated Proteins at Medium BPA concentrations	Carcinoid tumor of intestine	0.0022784231439255897
Total Dysregulated Proteins at Medium BPA concentrations	Pancreatic carcinoma	0.0022784231439255897
Total Dysregulated Proteins at Medium BPA concentrations	Premature aging syndrome	0.0022784231439255897
Total Dysregulated Proteins at Medium BPA concentrations	Todd Paralysis	0.002381564584734764
Total Dysregulated Proteins at Medium BPA concentrations	Paralysed	0.002381564584734764
Total Dysregulated Proteins at Medium BPA concentrations	Uveitis	0.002381564584734764
Total Dysregulated Proteins at Medium BPA concentrations	Fibrocystic Disease of Pancreas	0.002381564584734764
Total Dysregulated Proteins at Medium BPA concentrations	Encephalopathy, Subacute Necrotizing, Juvenile	0.002381564584734764
Total Dysregulated Proteins at Medium BPA concentrations	Encephalopathy, Subacute Necrotizing, Infantile	0.002381564584734764
Total Dysregulated Proteins at Medium BPA concentrations	Drug Withdrawal Symptoms	0.002531401200256432
Total Dysregulated Proteins at Medium BPA concentrations	Withdrawal Symptoms	0.002531401200256432
Total Dysregulated Proteins at Medium BPA concentrations	Substance Withdrawal Syndrome	0.002531401200256432
Total Dysregulated Proteins at Medium BPA concentrations	Lymphoma, Small Noncleaved-Cell	0.002710315790696025
Total Dysregulated Proteins at Medium BPA concentrations	Respiratory Hypersensitivity	0.002710315790696025
Total Dysregulated Proteins at Medium BPA concentrations	Leigh Syndrome due to Mitochondrial Complex V Deficiency	0.002730062211196069
Total Dysregulated Proteins at Medium BPA concentrations	Necrotizing encephalopathy, infantile subacute, of Leigh	0.002730062211196069
Total Dysregulated Proteins at Medium BPA concentrations	Leigh Syndrome Due To Mitochondrial Complex II Deficiency	0.002730062211196069
Total Dysregulated Proteins at Medium BPA concentrations	Leigh Syndrome due to Mitochondrial Complex III Deficiency	0.002730062211196069
Total Dysregulated Proteins at Medium BPA concentrations	Aneuploidy	0.002766996106992712
Total Dysregulated Proteins at Medium BPA concentrations	HOYERAAL-HREIDARSSON SYNDROME	0.002766996106992712
Total Dysregulated Proteins at Medium BPA concentrations	Noninfiltrating Intraductal Carcinoma	0.002766996106992712
Total Dysregulated Proteins at Medium BPA concentrations	Thymoma	0.002766996106992712
Total Dysregulated Proteins at Medium BPA concentrations	Atypical Ductal Breast Hyperplasia	0.002766996106992712
Total Dysregulated Proteins at Medium BPA concentrations	Cleft Lip with or without Cleft Palate	0.002766996106992712
Total Dysregulated Proteins at Medium BPA concentrations	Pigmented Basal Cell Carcinoma	0.0028316757903428134
Total Dysregulated Proteins at Medium BPA concentrations	Autosomal Recessive Polycystic Kidney Disease	0.0029134187897980886
Total Dysregulated Proteins at Medium BPA concentrations	Pheochromocytoma, Extra-Adrenal	0.002932993344860706
Total Dysregulated Proteins at Medium BPA concentrations	Blood Platelet Disorders	0.002932993344860706
Total Dysregulated Proteins at Medium BPA concentrations	Juvenile-Onset Still Disease	0.0029408424358834426
Total Dysregulated Proteins at Medium BPA concentrations	Combined immunodeficiency	0.0029925344323900433
Total Dysregulated Proteins at Medium BPA concentrations	Myelofibrosis	0.0030920924325101673
Total Dysregulated Proteins at Medium BPA concentrations	Anemia, Hemolytic, Congenital Nonspherocytic	0.0030920924325101673
Total Dysregulated Proteins at Medium BPA concentrations	Chromosome 22q11.2 Deletion Syndrome, Distal	0.0030920924325101673
Total Dysregulated Proteins at Medium BPA concentrations	Small cell carcinoma of lung	0.0030920924325101673
Total Dysregulated Proteins at Medium BPA concentrations	Endometrial Stromal Sarcoma	0.0030920924325101673
Total Dysregulated Proteins at Medium BPA concentrations	Polycythemia	0.0030920924325101673
Total Dysregulated Proteins at Medium BPA concentrations	Angle Closure Glaucoma	0.003198785772163378
Total Dysregulated Proteins at Medium BPA concentrations	Frontotemporal Lobar Degeneration	0.003198785772163378
Total Dysregulated Proteins at Medium BPA concentrations	Liver Neoplasms, Experimental	0.003198785772163378
Total Dysregulated Proteins at Medium BPA concentrations	Colonic Neoplasms	0.003198785772163378
Total Dysregulated Proteins at Medium BPA concentrations	Hypertrophic Cardiomyopathy	0.003201099544300964
Total Dysregulated Proteins at Medium BPA concentrations	Cardiomyopathies	0.003201099544300964
Total Dysregulated Proteins at Medium BPA concentrations	Dystonia, Diurnal	0.003201099544300964
Total Dysregulated Proteins at Medium BPA concentrations	Dystonia, Limb	0.003201099544300964
Total Dysregulated Proteins at Medium BPA concentrations	Retinitis Pigmentosa	0.003242027541497016
Total Dysregulated Proteins at Medium BPA concentrations	Morbilliform Drug Reaction	0.003399957025233537
Total Dysregulated Proteins at Medium BPA concentrations	Drug Eruptions	0.003399957025233537
Total Dysregulated Proteins at Medium BPA concentrations	Etat Marbre	0.003399957025233537
Total Dysregulated Proteins at Medium BPA concentrations	Idiopathic bronchiectasis	0.00344593467758388
Total Dysregulated Proteins at Medium BPA concentrations	PARKINSON DISEASE, LATE-ONSET	0.00344593467758388
Total Dysregulated Proteins at Medium BPA concentrations	Clear cell sarcoma of kidney	0.00344593467758388
Total Dysregulated Proteins at Medium BPA concentrations	Exanthema	0.00344593467758388
Total Dysregulated Proteins at Medium BPA concentrations	Thrombocythemia, Essential	0.00344593467758388
Total Dysregulated Proteins at Medium BPA concentrations	Myeloproliferative disease	0.00344593467758388
Total Dysregulated Proteins at Medium BPA concentrations	Semantic Dementia	0.00344593467758388
Total Dysregulated Proteins at Medium BPA concentrations	Primary Myelofibrosis	0.00344593467758388
Total Dysregulated Proteins at Medium BPA concentrations	Autosomal Dominant Emery-Dreifuss Muscular Dystrophy (disorder)	0.00344593467758388
Total Dysregulated Proteins at Medium BPA concentrations	Polyploidy	0.00344593467758388
Total Dysregulated Proteins at Medium BPA concentrations	Multiple Sclerosis, Acute Fulminating	0.0034790418459337068
Total Dysregulated Proteins at Medium BPA concentrations	Liver Cirrhosis, Experimental	0.0034790418459337068
Total Dysregulated Proteins at Medium BPA concentrations	Pathological accumulation of air in tissues	0.003479389108767305
Total Dysregulated Proteins at Medium BPA concentrations	Status Dysraphicus	0.003479389108767305
Total Dysregulated Proteins at Medium BPA concentrations	Mental Retardation, X-Linked Nonsyndromic	0.003479389108767305
Total Dysregulated Proteins at Medium BPA concentrations	Akinetic-Rigid Variant of Huntington Disease	0.003479389108767305
Total Dysregulated Proteins at Medium BPA concentrations	Huntington Disease, Late Onset	0.003479389108767305
Total Dysregulated Proteins at Medium BPA concentrations	Rachischisis	0.003479389108767305
Total Dysregulated Proteins at Medium BPA concentrations	Congenital hernia of foramen of Morgagni	0.0035415292900937726
Total Dysregulated Proteins at Medium BPA concentrations	Pseudopelade	0.0035415292900937726
Total Dysregulated Proteins at Medium BPA concentrations	Congenital hernia of foramen of Bochdalek	0.0035415292900937726
Total Dysregulated Proteins at Medium BPA concentrations	Tactile Allodynia	0.0035997919353932518
Total Dysregulated Proteins at Medium BPA concentrations	Allodynia	0.0035997919353932518
Total Dysregulated Proteins at Medium BPA concentrations	Hyperalgesia, Primary	0.0035997919353932518
Total Dysregulated Proteins at Medium BPA concentrations	Mechanical Allodynia	0.0035997919353932518
Total Dysregulated Proteins at Medium BPA concentrations	Hyperalgesia, Secondary	0.0035997919353932518
Total Dysregulated Proteins at Medium BPA concentrations	Hyperalgesia, Thermal	0.0035997919353932518
Total Dysregulated Proteins at Medium BPA concentrations	Leukemia, Megakaryoblastic, of Down Syndrome	0.0036694062260546117
Total Dysregulated Proteins at Medium BPA concentrations	Schizophrenia	0.0036694062260546117
Total Dysregulated Proteins at Medium BPA concentrations	Inguinal Cryptorchidism	0.0036694062260546117
Total Dysregulated Proteins at Medium BPA concentrations	Abdominal Cryptorchidism	0.0036694062260546117
Total Dysregulated Proteins at Medium BPA concentrations	Neoplasm Metastasis	0.0036694062260546117
Total Dysregulated Proteins at Medium BPA concentrations	Unilateral Cryptorchidism	0.0036694062260546117
Total Dysregulated Proteins at Medium BPA concentrations	Bilateral Cryptorchidism	0.0036694062260546117
Total Dysregulated Proteins at Medium BPA concentrations	Ventricular Dysfunction	0.0036694062260546117
Total Dysregulated Proteins at Medium BPA concentrations	Miscarriage	0.003833254775049013
Total Dysregulated Proteins at Medium BPA concentrations	Abortion, Tubal	0.003833254775049013
Total Dysregulated Proteins at Medium BPA concentrations	Early Pregnancy Loss	0.003833254775049013
Total Dysregulated Proteins at Medium BPA concentrations	Spontaneous abortion	0.003833254775049013
Total Dysregulated Proteins at Medium BPA concentrations	Dystonia, Paroxysmal	0.0038517481070894167
Total Dysregulated Proteins at Medium BPA concentrations	Severe Congenital Microcephaly	0.003918352844690652
Total Dysregulated Proteins at Medium BPA concentrations	Fasting Hypoglycemia	0.00398120026737448
Total Dysregulated Proteins at Medium BPA concentrations	Respiratory Insufficiency	0.00398120026737448
Total Dysregulated Proteins at Medium BPA concentrations	Respiratory Failure	0.00398120026737448
Total Dysregulated Proteins at Medium BPA concentrations	Brain hemorrhage	0.00398120026737448
Total Dysregulated Proteins at Medium BPA concentrations	Reactive hypoglycemia	0.00398120026737448
Total Dysregulated Proteins at Medium BPA concentrations	Respiratory Depression	0.00398120026737448
Total Dysregulated Proteins at Medium BPA concentrations	Congenital Structural Myopathy	0.00398120026737448
Total Dysregulated Proteins at Medium BPA concentrations	Delirium	0.00398120026737448
Total Dysregulated Proteins at Medium BPA concentrations	Autosomal Dominant Myotubular Myopathy	0.00398120026737448
Total Dysregulated Proteins at Medium BPA concentrations	Peripheral T-Cell Lymphoma	0.00398120026737448
Total Dysregulated Proteins at Medium BPA concentrations	Anemia, Microangiopathic	0.00398120026737448
Total Dysregulated Proteins at Medium BPA concentrations	Microangiopathic hemolytic anemia	0.00398120026737448
Total Dysregulated Proteins at Medium BPA concentrations	Anemia, Hemolytic, Acquired	0.00398120026737448
Total Dysregulated Proteins at Medium BPA concentrations	Renal Cell Carcinoma	0.004051562636636293
Total Dysregulated Proteins at Medium BPA concentrations	Nonmedullary Thyroid Carcinoma	0.004051562636636293
Total Dysregulated Proteins at Medium BPA concentrations	Familial Nonmedullary Thyroid Cancer	0.004051562636636293
Total Dysregulated Proteins at Medium BPA concentrations	Choledochal Cyst, Type I	0.004066069687976913
Total Dysregulated Proteins at Medium BPA concentrations	Chronic schizophrenia	0.004066069687976913
Total Dysregulated Proteins at Medium BPA concentrations	Coloboma of choroid and retina	0.004066069687976913
Total Dysregulated Proteins at Medium BPA concentrations	Choledochal Cyst, Type III	0.004066069687976913
Total Dysregulated Proteins at Medium BPA concentrations	Choledochal Cyst, Type V	0.004066069687976913
Total Dysregulated Proteins at Medium BPA concentrations	Choledochal Cyst, Type IV	0.004066069687976913
Total Dysregulated Proteins at Medium BPA concentrations	Major depression, single episode	0.004066069687976913
Total Dysregulated Proteins at Medium BPA concentrations	Carcinoma, Basal Cell	0.004066069687976913
Total Dysregulated Proteins at Medium BPA concentrations	Choledochal Cyst	0.004066069687976913
Total Dysregulated Proteins at Medium BPA concentrations	Thrombocytosis, Autosomal Dominant	0.004066069687976913
Total Dysregulated Proteins at Medium BPA concentrations	Choledochal Cyst, Type II	0.004066069687976913
Total Dysregulated Proteins at Medium BPA concentrations	Hereditary Paraganglioma-Pheochromocytoma Syndrome	0.004066069687976913
Total Dysregulated Proteins at Medium BPA concentrations	Congenital coloboma of iris	0.004066069687976913
Total Dysregulated Proteins at Medium BPA concentrations	Papillary thyroid carcinoma	0.004066069687976913
Total Dysregulated Proteins at Medium BPA concentrations	Liver Diseases, Parasitic	0.004066069687976913
Total Dysregulated Proteins at Medium BPA concentrations	Common Variable Immunodeficiency	0.004066069687976913
Total Dysregulated Proteins at Medium BPA concentrations	Familial thoracic aortic aneurysm and aortic dissection	0.004090171141300705
Total Dysregulated Proteins at Medium BPA concentrations	Fibromyxosarcoma	0.004131118738870873
Total Dysregulated Proteins at Medium BPA concentrations	Muscular Dystrophy, Emery-Dreifuss	0.004131118738870873
Total Dysregulated Proteins at Medium BPA concentrations	Genitourinary Neoplasms	0.004131118738870873
Total Dysregulated Proteins at Medium BPA concentrations	Morphea	0.004131118738870873
Total Dysregulated Proteins at Medium BPA concentrations	Genitourinary Cancer	0.004131118738870873
Total Dysregulated Proteins at Medium BPA concentrations	Linear Scleroderma	0.004131118738870873
Total Dysregulated Proteins at Medium BPA concentrations	Cardiomyopathy, Familial Idiopathic	0.004131118738870873
Total Dysregulated Proteins at Medium BPA concentrations	Localized scleroderma	0.004131118738870873
Total Dysregulated Proteins at Medium BPA concentrations	Biliary Tract Neoplasm	0.004435391119004618
Total Dysregulated Proteins at Medium BPA concentrations	Costello syndrome (disorder)	0.004435391119004618
Total Dysregulated Proteins at Medium BPA concentrations	Mitochondrial Encephalomyopathies	0.004435391119004618
Total Dysregulated Proteins at Medium BPA concentrations	Congenital small ears	0.004470358697177866
Total Dysregulated Proteins at Medium BPA concentrations	Amphetamine-Related Disorders	0.004637444505326158
Total Dysregulated Proteins at Medium BPA concentrations	Amphetamine Addiction	0.004637444505326158
Total Dysregulated Proteins at Medium BPA concentrations	Amphetamine Abuse	0.004637444505326158
Total Dysregulated Proteins at Medium BPA concentrations	Myocardial Reperfusion Injury	0.00468274293191728
Total Dysregulated Proteins at Medium BPA concentrations	Low Grade Lymphoma (neoplasm)	0.004786338740581473
Total Dysregulated Proteins at Medium BPA concentrations	Diffuse Mixed-Cell Lymphoma	0.004786338740581473
Total Dysregulated Proteins at Medium BPA concentrations	Lymphoma, Mixed-Cell	0.004786338740581473
Total Dysregulated Proteins at Medium BPA concentrations	Congenital diaphragmatic hernia	0.004786338740581473
Total Dysregulated Proteins at Medium BPA concentrations	Precursor B-cell lymphoblastic leukemia	0.004786338740581473
Total Dysregulated Proteins at Medium BPA concentrations	High Grade Lymphoma (neoplasm)	0.004786338740581473
Total Dysregulated Proteins at Medium BPA concentrations	Lymphoma, Undifferentiated	0.004786338740581473
Total Dysregulated Proteins at Medium BPA concentrations	Lymphoma, Intermediate-Grade	0.004786338740581473
Total Dysregulated Proteins at Medium BPA concentrations	Reticulosarcoma	0.004786338740581473
Total Dysregulated Proteins at Medium BPA concentrations	Lymphoma, Diffuse	0.004786338740581473
Total Dysregulated Proteins at Medium BPA concentrations	Congenital Foot Deformity	0.0048351320419547745
Total Dysregulated Proteins at Medium BPA concentrations	Penile Neoplasms	0.0048351320419547745
Total Dysregulated Proteins at Medium BPA concentrations	Psychomotor Agitation	0.0048351320419547745
Total Dysregulated Proteins at Medium BPA concentrations	Malignant neoplasm of penis	0.0048351320419547745
Total Dysregulated Proteins at Medium BPA concentrations	Malignant tumor of cervix	0.0048351320419547745
Total Dysregulated Proteins at Medium BPA concentrations	Akathisia	0.0048351320419547745
Total Dysregulated Proteins at Medium BPA concentrations	Scleroderma	0.0048351320419547745
Total Dysregulated Proteins at Medium BPA concentrations	Distal Hereditary Motor Neuropathy, Type II	0.0048351320419547745
Total Dysregulated Proteins at Medium BPA concentrations	Language Disorders	0.0048351320419547745
Total Dysregulated Proteins at Medium BPA concentrations	Embryo Resorption	0.004878593409715266
Total Dysregulated Proteins at Medium BPA concentrations	Hepatitis	0.004878593409715266
Total Dysregulated Proteins at Medium BPA concentrations	Embryo Disintegration	0.004878593409715266
Total Dysregulated Proteins at Medium BPA concentrations	Pilomyxoid astrocytoma	0.004878593409715266
Total Dysregulated Proteins at Medium BPA concentrations	Embryo Death	0.004878593409715266
Total Dysregulated Proteins at Medium BPA concentrations	Hepatitis C	0.004878593409715266
Total Dysregulated Proteins at Medium BPA concentrations	Lymphoma, Large-Cell, Follicular	0.004878593409715266
Total Dysregulated Proteins at Medium BPA concentrations	Lymphoma, Follicular, Grade 3	0.004878593409715266
Total Dysregulated Proteins at Medium BPA concentrations	Lymphoma, Follicular, Grade 2	0.004878593409715266
Total Dysregulated Proteins at Medium BPA concentrations	Nemaline Myopathy, Childhood Onset	0.004878593409715266
Total Dysregulated Proteins at Medium BPA concentrations	Reperfusion Injury	0.004878593409715266
Total Dysregulated Proteins at Medium BPA concentrations	Lymphoma, Follicular, Grade 1	0.004878593409715266
Total Dysregulated Proteins at Medium BPA concentrations	Embryo Loss	0.004878593409715266
Total Dysregulated Proteins at Medium BPA concentrations	Microlissencephaly	0.004878593409715266
Total Dysregulated Proteins at Medium BPA concentrations	Blastocyst Disintegration	0.004878593409715266
Total Dysregulated Proteins at Medium BPA concentrations	Solid Neoplasm	0.004878593409715266
Total Dysregulated Proteins at Medium BPA concentrations	Lymphoma, Mixed-Cell, Follicular	0.004878593409715266
Total Dysregulated Proteins at Medium BPA concentrations	Cardio-facio-cutaneous syndrome	0.004878593409715266
Total Dysregulated Proteins at Medium BPA concentrations	MiT family translocation renal cell carcinoma	0.004878593409715266
Total Dysregulated Proteins at Medium BPA concentrations	Internal Carotid Artery Diseases	0.005271155827272229
Total Dysregulated Proteins at Medium BPA concentrations	Carotid Atherosclerosis	0.005271155827272229
Total Dysregulated Proteins at Medium BPA concentrations	Immunoglobulin Deficiency, Late-Onset	0.005271155827272229
Total Dysregulated Proteins at Medium BPA concentrations	Arterial Diseases, Common Carotid	0.005271155827272229
Total Dysregulated Proteins at Medium BPA concentrations	External Carotid Artery Diseases	0.005271155827272229
Total Dysregulated Proteins at Medium BPA concentrations	Hypoglycemia	0.005271155827272229
Total Dysregulated Proteins at Medium BPA concentrations	Carotid Artery Diseases	0.005271155827272229
Total Dysregulated Proteins at Medium BPA concentrations	Acquired Hypogammaglobulinemia	0.005271155827272229
Total Dysregulated Proteins at Medium BPA concentrations	Lymphoma, Lymphocytic, Intermediate	0.005271155827272229
Total Dysregulated Proteins at Medium BPA concentrations	Primary microcephaly	0.005522779132576899
Total Dysregulated Proteins at Medium BPA concentrations	Microangiopathy, Diabetic	0.005522779132576899
Total Dysregulated Proteins at Medium BPA concentrations	Familial Colorectal Cancer Type X	0.005673124076012821
Total Dysregulated Proteins at Medium BPA concentrations	Thyroid Neoplasm	0.005673124076012821
Total Dysregulated Proteins at Medium BPA concentrations	Brachydactyly	0.005673124076012821
Total Dysregulated Proteins at Medium BPA concentrations	Mitochondrial Complex II Deficiency	0.005673124076012821
Total Dysregulated Proteins at Medium BPA concentrations	Schwannomatosis	0.005673124076012821
Total Dysregulated Proteins at Medium BPA concentrations	Synovitis	0.005673124076012821
Total Dysregulated Proteins at Medium BPA concentrations	Malignant Glioma	0.005673124076012821
Total Dysregulated Proteins at Medium BPA concentrations	Torre-Muir syndrome	0.005673124076012821
Total Dysregulated Proteins at Medium BPA concentrations	Leukostasis	0.005673124076012821
Total Dysregulated Proteins at Medium BPA concentrations	Cardiac Arrhythmia	0.005673124076012821
Total Dysregulated Proteins at Medium BPA concentrations	Drug-induced paranoid state	0.005673124076012821
Total Dysregulated Proteins at Medium BPA concentrations	Myocardial Infarction	0.005673124076012821
Total Dysregulated Proteins at Medium BPA concentrations	Synovial Hypertrophy	0.005673124076012821
Total Dysregulated Proteins at Medium BPA concentrations	Malignant neoplasm of adrenal cortex	0.005673124076012821
Total Dysregulated Proteins at Medium BPA concentrations	Mouth Neoplasms	0.005673124076012821
Total Dysregulated Proteins at Medium BPA concentrations	Cap Myopathy	0.005673124076012821
Total Dysregulated Proteins at Medium BPA concentrations	FG SYNDROME 3	0.005673124076012821
Total Dysregulated Proteins at Medium BPA concentrations	Kidney Neoplasm	0.005673124076012821
Total Dysregulated Proteins at Medium BPA concentrations	Spinocerebellar Ataxia Type 4	0.005797006470992399
Total Dysregulated Proteins at Medium BPA concentrations	Pleoconial Myopathies	0.005848899981405449
Total Dysregulated Proteins at Medium BPA concentrations	Hereditary Nonpolyposis Colorectal Cancer	0.005848899981405449
Total Dysregulated Proteins at Medium BPA concentrations	Congenital Hand Deformities	0.005848899981405449
Total Dysregulated Proteins at Medium BPA concentrations	Luft Disease	0.005848899981405449
Total Dysregulated Proteins at Medium BPA concentrations	Megaconial Myopathies	0.005848899981405449
Total Dysregulated Proteins at Medium BPA concentrations	Sudden Cardiac Death	0.005848899981405449
Total Dysregulated Proteins at Medium BPA concentrations	Conventional (Clear Cell) Renal Cell Carcinoma	0.005875341791059267
Total Dysregulated Proteins at Medium BPA concentrations	Nerve Sheath Tumors	0.005875341791059267
Total Dysregulated Proteins at Medium BPA concentrations	Amnestic State	0.005875341791059267
Total Dysregulated Proteins at Medium BPA concentrations	Hysterical amnesia	0.005875341791059267
Total Dysregulated Proteins at Medium BPA concentrations	Arterial Fatty Streak	0.005875341791059267
Total Dysregulated Proteins at Medium BPA concentrations	Congenital clubfoot	0.005875341791059267
Total Dysregulated Proteins at Medium BPA concentrations	Keratosis Blennorrhagica	0.005875341791059267
Total Dysregulated Proteins at Medium BPA concentrations	Precursor B-Cell Lymphoblastic Leukemia-Lymphoma	0.005875341791059267
Total Dysregulated Proteins at Medium BPA concentrations	Abnormalities, Drug-Induced	0.005875341791059267
Total Dysregulated Proteins at Medium BPA concentrations	Hereditary Nonpolyposis Colorectal Neoplasms	0.005875341791059267
Total Dysregulated Proteins at Medium BPA concentrations	Perineurioma	0.005875341791059267
Total Dysregulated Proteins at Medium BPA concentrations	Cardiomegaly	0.005875341791059267
Total Dysregulated Proteins at Medium BPA concentrations	Tactile Amnesia	0.005875341791059267
Total Dysregulated Proteins at Medium BPA concentrations	Fibroatheroma	0.005875341791059267
Total Dysregulated Proteins at Medium BPA concentrations	Global Amnesia	0.005875341791059267
Total Dysregulated Proteins at Medium BPA concentrations	Keratosis	0.005875341791059267
Total Dysregulated Proteins at Medium BPA concentrations	Neurofibromatosis 3	0.005875341791059267
Total Dysregulated Proteins at Medium BPA concentrations	Malignant neoplasm of thyroid	0.005875341791059267
Total Dysregulated Proteins at Medium BPA concentrations	Dissociative Amnesia	0.005875341791059267
Total Dysregulated Proteins at Medium BPA concentrations	Keratoma	0.005875341791059267
Total Dysregulated Proteins at Medium BPA concentrations	Plaque, Atherosclerotic	0.005875341791059267
Total Dysregulated Proteins at Medium BPA concentrations	Macrothrombocytopenia	0.005875341791059267
Total Dysregulated Proteins at Medium BPA concentrations	B-Cell Lymphomas	0.005875341791059267
Total Dysregulated Proteins at Medium BPA concentrations	Temporary Amnesia	0.005875341791059267
Total Dysregulated Proteins at Medium BPA concentrations	Precursor T-Cell Lymphoblastic Leukemia-Lymphoma	0.005875341791059267
Total Dysregulated Proteins at Medium BPA concentrations	Atheroma	0.005875341791059267
Total Dysregulated Proteins at Medium BPA concentrations	Peripheral Nerve Sheath Neoplasm	0.005875341791059267
Total Dysregulated Proteins at Medium BPA concentrations	Primary pigmented nodular adrenocortical disease	0.006594313768725701
Total Dysregulated Proteins at Medium BPA concentrations	Extra-osseous Ewing's sarcoma	0.006594313768725701
Total Dysregulated Proteins at Medium BPA concentrations	Macrostomia	0.006594313768725701
Total Dysregulated Proteins at Medium BPA concentrations	Myasthenia Gravis, Ocular	0.006594313768725701
Total Dysregulated Proteins at Medium BPA concentrations	Myasthenia Gravis, Generalized	0.006594313768725701
Total Dysregulated Proteins at Medium BPA concentrations	Adult type dermatomyositis	0.006594313768725701
Total Dysregulated Proteins at Medium BPA concentrations	Juvenile amyotrophic lateral sclerosis	0.006594313768725701
Total Dysregulated Proteins at Medium BPA concentrations	Manic mood	0.006594313768725701
Total Dysregulated Proteins at Medium BPA concentrations	Mesencephalic Neoplasms	0.006594313768725701
Total Dysregulated Proteins at Medium BPA concentrations	Brain Stem Neoplasms	0.006594313768725701
Total Dysregulated Proteins at Medium BPA concentrations	Myeloid Leukemia, Chronic	0.006594313768725701
Total Dysregulated Proteins at Medium BPA concentrations	Brain Ischemia	0.006594313768725701
Total Dysregulated Proteins at Medium BPA concentrations	Liposarcoma, Pleomorphic	0.006594313768725701
Total Dysregulated Proteins at Medium BPA concentrations	Paraganglioma	0.006594313768725701
Total Dysregulated Proteins at Medium BPA concentrations	Dystonia	0.006594313768725701
Total Dysregulated Proteins at Medium BPA concentrations	Myasthenia Gravis	0.006594313768725701
Total Dysregulated Proteins at Medium BPA concentrations	Streptococcal pneumonia	0.006594313768725701
Total Dysregulated Proteins at Medium BPA concentrations	Sensory hearing loss	0.006594313768725701
Total Dysregulated Proteins at Medium BPA concentrations	Carcinoma in situ of uterine cervix	0.006594313768725701
Total Dysregulated Proteins at Medium BPA concentrations	Varicosity	0.006594313768725701
Total Dysregulated Proteins at Medium BPA concentrations	Hyperglycemia	0.006594313768725701
Total Dysregulated Proteins at Medium BPA concentrations	Alcohol Related Birth Defect	0.006594313768725701
Total Dysregulated Proteins at Medium BPA concentrations	Medullary Neoplasms	0.006594313768725701
Total Dysregulated Proteins at Medium BPA concentrations	Hematopoietic Neoplasms	0.006594313768725701
Total Dysregulated Proteins at Medium BPA concentrations	Pontine Tumors	0.006594313768725701
Total Dysregulated Proteins at Medium BPA concentrations	Dermatomyositis	0.006594313768725701
Total Dysregulated Proteins at Medium BPA concentrations	Short Stature, CTCAE	0.006594313768725701
Total Dysregulated Proteins at Medium BPA concentrations	Elliptocytosis found	0.006594313768725701
Total Dysregulated Proteins at Medium BPA concentrations	Miller Dieker syndrome	0.006594313768725701
Total Dysregulated Proteins at Medium BPA concentrations	Brain Stem Neoplasms, Primary	0.006594313768725701
Total Dysregulated Proteins at Medium BPA concentrations	Dermatomyositis, Childhood Type	0.006594313768725701
Total Dysregulated Proteins at Medium BPA concentrations	Cholangiocarcinoma	0.006594313768725701
Total Dysregulated Proteins at Medium BPA concentrations	Neurofibromatosis, Type 3, mixed central and peripheral	0.006594313768725701
Total Dysregulated Proteins at Medium BPA concentrations	Short stature	0.006594313768725701
Total Dysregulated Proteins at Medium BPA concentrations	Anhydrotic Ectodermal Dysplasias	0.006594313768725701
Total Dysregulated Proteins at Medium BPA concentrations	Autosomal dominant hypohidrotic ectodermal dysplasia syndrome (disorder)	0.006594313768725701
Total Dysregulated Proteins at Medium BPA concentrations	Familial meningioma	0.006594313768725701
Total Dysregulated Proteins at Medium BPA concentrations	Metabolic Diseases	0.006594313768725701
Total Dysregulated Proteins at Medium BPA concentrations	Turcot syndrome (disorder)	0.006594313768725701
Total Dysregulated Proteins at Medium BPA concentrations	Lipoatrophic Diabetes Mellitus	0.006594313768725701
Total Dysregulated Proteins at Medium BPA concentrations	Omenn Syndrome	0.006659720999465815
Total Dysregulated Proteins at Medium BPA concentrations	Fulminant Hepatic Failure with Cerebral Edema	0.00683538040006411
Total Dysregulated Proteins at Medium BPA concentrations	Hepatic Stupor	0.00683538040006411
Total Dysregulated Proteins at Medium BPA concentrations	Hepatic Coma	0.00683538040006411
Total Dysregulated Proteins at Medium BPA concentrations	Tobacco Dependence	0.00683538040006411
Total Dysregulated Proteins at Medium BPA concentrations	Nicotine Use Disorder	0.00683538040006411
Total Dysregulated Proteins at Medium BPA concentrations	Ulcerative Colitis	0.00683538040006411
Total Dysregulated Proteins at Medium BPA concentrations	Hypertrophy	0.007086508103317777
Total Dysregulated Proteins at Medium BPA concentrations	Sclerocystic Ovaries	0.007090117537342363
Total Dysregulated Proteins at Medium BPA concentrations	Insulin Resistance	0.007124141551427851
Total Dysregulated Proteins at Medium BPA concentrations	Diaphragmatic Hernia	0.007124141551427851
Total Dysregulated Proteins at Medium BPA concentrations	Apraxia of Phonation	0.007353532664049493
Total Dysregulated Proteins at Medium BPA concentrations	Ptosis	0.007353532664049493
Total Dysregulated Proteins at Medium BPA concentrations	Thoracic Diseases	0.007353532664049493
Total Dysregulated Proteins at Medium BPA concentrations	Elliptocytosis, Hereditary	0.007353532664049493
Total Dysregulated Proteins at Medium BPA concentrations	Mammary Neoplasms, Human	0.007353532664049493
Total Dysregulated Proteins at Medium BPA concentrations	Acute lymphocytic leukemia	0.007353532664049493
Total Dysregulated Proteins at Medium BPA concentrations	Bilateral Periventricular Nodular Heterotopia	0.007353532664049493
Total Dysregulated Proteins at Medium BPA concentrations	FOCAL CORTICAL DYSPLASIA OF TAYLOR	0.007353532664049493
Total Dysregulated Proteins at Medium BPA concentrations	Mammary Carcinoma, Human	0.007353532664049493
Total Dysregulated Proteins at Medium BPA concentrations	Developmental Psychomotor Disorders	0.007353532664049493
Total Dysregulated Proteins at Medium BPA concentrations	Verrucous epidermal nevus	0.007353532664049493
Total Dysregulated Proteins at Medium BPA concentrations	Linear Verrucous Epidermal Nevus	0.007353532664049493
Total Dysregulated Proteins at Medium BPA concentrations	Urogenital Abnormalities	0.007353532664049493
Total Dysregulated Proteins at Medium BPA concentrations	Focal Cortical Dysplasia of Taylor, Type IIa	0.007353532664049493
Total Dysregulated Proteins at Medium BPA concentrations	MENINGIOMA, FAMILIAL, SUSCEPTIBILITY TO	0.007353532664049493
Total Dysregulated Proteins at Medium BPA concentrations	Organoid Nevus Phakomatosis	0.007353532664049493
Total Dysregulated Proteins at Medium BPA concentrations	Phencyclidine Abuse	0.007353532664049493
Total Dysregulated Proteins at Medium BPA concentrations	Carcinosarcoma	0.007353532664049493
Total Dysregulated Proteins at Medium BPA concentrations	Focal Cortical Dysplasia of Taylor, Type IIb	0.007353532664049493
Total Dysregulated Proteins at Medium BPA concentrations	Phencyclidine-Related Disorders	0.007353532664049493
Total Dysregulated Proteins at Medium BPA concentrations	Hypoplastic Left Heart Syndrome	0.007353532664049493
Total Dysregulated Proteins at Medium BPA concentrations	Psychomotor Disorders	0.007353532664049493
Total Dysregulated Proteins at Medium BPA concentrations	Extraskeletal Myxoid Chondrosarcoma	0.007353532664049493
Total Dysregulated Proteins at Medium BPA concentrations	Burkitt Lymphoma	0.007353532664049493
Total Dysregulated Proteins at Medium BPA concentrations	Cerebellar Diseases	0.007353532664049493
Total Dysregulated Proteins at Medium BPA concentrations	Endometriosis	0.007353532664049493
Total Dysregulated Proteins at Medium BPA concentrations	Inflammatory linear verrucous epidermal nevus	0.007353532664049493
Total Dysregulated Proteins at Medium BPA concentrations	Cystic Echinocccosis	0.007353532664049493
Total Dysregulated Proteins at Medium BPA concentrations	Echinococcosis	0.007353532664049493
Total Dysregulated Proteins at Medium BPA concentrations	Blepharoptosis	0.007353532664049493
Total Dysregulated Proteins at Medium BPA concentrations	Nevus Sebaceus of Jadassohn	0.007353532664049493
Total Dysregulated Proteins at Medium BPA concentrations	Fibrous skin tumor of tuberous sclerosis	0.007353532664049493
Total Dysregulated Proteins at Medium BPA concentrations	Nevus sebaceous	0.007353532664049493
Total Dysregulated Proteins at Medium BPA concentrations	Hand deformities	0.007353532664049493
Total Dysregulated Proteins at Medium BPA concentrations	Cachexia	0.007353532664049493
Total Dysregulated Proteins at Medium BPA concentrations	Hepatic Form of Wilson Disease	0.007955600438005948
Total Dysregulated Proteins at Medium BPA concentrations	Asthma	0.007955600438005948
Total Dysregulated Proteins at Medium BPA concentrations	Dissection of aorta	0.008403480784072178
Total Dysregulated Proteins at Medium BPA concentrations	Other restrictive cardiomyopathy	0.008403480784072178
Total Dysregulated Proteins at Medium BPA concentrations	Loeys-Dietz Syndrome	0.008403480784072178
Total Dysregulated Proteins at Medium BPA concentrations	Polyarthritis	0.008403480784072178
Total Dysregulated Proteins at Medium BPA concentrations	Malignant melanoma of iris	0.008403480784072178
Total Dysregulated Proteins at Medium BPA concentrations	Aneurysm, Dissecting	0.008403480784072178
Total Dysregulated Proteins at Medium BPA concentrations	Malignant melanoma of choroid	0.008403480784072178
Total Dysregulated Proteins at Medium BPA concentrations	Uveal melanoma	0.008403480784072178
Total Dysregulated Proteins at Medium BPA concentrations	Partial Fetal Alcohol Syndrome	0.008403480784072178
Total Dysregulated Proteins at Medium BPA concentrations	Vitamin A Deficiency	0.008403480784072178
Total Dysregulated Proteins at Medium BPA concentrations	Dissection, Blood Vessel	0.008403480784072178
Total Dysregulated Proteins at Medium BPA concentrations	Alcohol Related Neurodevelopmental Disorder	0.008403480784072178
Total Dysregulated Proteins at Medium BPA concentrations	Lynch Syndrome	0.008403480784072178
Total Dysregulated Proteins at Medium BPA concentrations	Familial ventricular tachycardia	0.008403480784072178
Total Dysregulated Proteins at Medium BPA concentrations	Hemangiosarcoma	0.008403480784072178
Total Dysregulated Proteins at Medium BPA concentrations	Metastatic melanoma	0.008646931999774765
Total Dysregulated Proteins at Medium BPA concentrations	Androgenetic Alopecia	0.008741668070531694
Total Dysregulated Proteins at Medium BPA concentrations	Catalepsy	0.008741668070531694
Total Dysregulated Proteins at Medium BPA concentrations	Copper-Overload Cirrhosis	0.008741668070531694
Total Dysregulated Proteins at Medium BPA concentrations	Female pattern alopecia (disorder)	0.008741668070531694
Total Dysregulated Proteins at Medium BPA concentrations	Osteoarthritis of hip	0.008741668070531694
Total Dysregulated Proteins at Medium BPA concentrations	Cerebrovascular accident	0.008741668070531694
Total Dysregulated Proteins at Medium BPA concentrations	Carcinoma in situ of bladder	0.008741668070531694
Total Dysregulated Proteins at Medium BPA concentrations	Premature Birth	0.008741668070531694
Total Dysregulated Proteins at Medium BPA concentrations	Neoplasm of uncertain or unknown behavior of bladder	0.008741668070531694
Total Dysregulated Proteins at Medium BPA concentrations	Muscular Dystrophies, Limb-Girdle	0.008741668070531694
Total Dysregulated Proteins at Medium BPA concentrations	Benign neoplasm of bladder	0.008741668070531694
Total Dysregulated Proteins at Medium BPA concentrations	Waxy flexibility	0.008741668070531694
Total Dysregulated Proteins at Medium BPA concentrations	Spongioblastoma	0.008989360831556025
Total Dysregulated Proteins at Medium BPA concentrations	Ependymoblastoma	0.008989360831556025
Total Dysregulated Proteins at Medium BPA concentrations	Medulloepithelioma	0.008989360831556025
Total Dysregulated Proteins at Medium BPA concentrations	Clinically Isolated Syndrome, CNS Demyelinating	0.008989360831556025
Total Dysregulated Proteins at Medium BPA concentrations	Demyelination	0.008989360831556025
Total Dysregulated Proteins at Medium BPA concentrations	Focal glomerulosclerosis	0.008989360831556025
Total Dysregulated Proteins at Medium BPA concentrations	Colitis	0.008989360831556025
Total Dysregulated Proteins at Medium BPA concentrations	Sudden Cardiac Arrest	0.008989360831556025
Total Dysregulated Proteins at Medium BPA concentrations	AUTISM, SUSCEPTIBILITY TO, 15	0.008989360831556025
Total Dysregulated Proteins at Medium BPA concentrations	Coffin-Siris syndrome	0.008989360831556025
Total Dysregulated Proteins at Medium BPA concentrations	Cerebral Primitive Neuroectodermal Tumor	0.008989360831556025
Total Dysregulated Proteins at Medium BPA concentrations	Abnormality of the skeletal system	0.008989360831556025
Total Dysregulated Proteins at Medium BPA concentrations	Rheumatoid Arthritis	0.009061686188278767
Total Dysregulated Proteins at Medium BPA concentrations	Acute Erythroblastic Leukemia	0.009101223673406742
Total Dysregulated Proteins at Medium BPA concentrations	Male Germ Cell Tumor	0.009101223673406742
Total Dysregulated Proteins at Medium BPA concentrations	Clear Cell Sarcoma of Soft Tissue	0.009101223673406742
Total Dysregulated Proteins at Medium BPA concentrations	Myopathy, Centronuclear, Autosomal Dominant	0.009101223673406742
Total Dysregulated Proteins at Medium BPA concentrations	Adenocarcinoma of large intestine	0.009101223673406742
Total Dysregulated Proteins at Medium BPA concentrations	Clinodactyly of fingers	0.009101223673406742
Total Dysregulated Proteins at Medium BPA concentrations	Hemangioma	0.009101223673406742
Total Dysregulated Proteins at Medium BPA concentrations	Periventricular Nodular Heterotopia	0.009101223673406742
Total Dysregulated Proteins at Medium BPA concentrations	Auriculo-Ventricular Dissociation	0.009101223673406742
Total Dysregulated Proteins at Medium BPA concentrations	LEOPARD Syndrome	0.009101223673406742
Total Dysregulated Proteins at Medium BPA concentrations	Ankylosing spondylitis	0.009101223673406742
Total Dysregulated Proteins at Medium BPA concentrations	Transitional cell carcinoma of bladder	0.009101223673406742
Total Dysregulated Proteins at Medium BPA concentrations	Amyloidosis, familial visceral	0.009101223673406742
Total Dysregulated Proteins at Medium BPA concentrations	Chorioangioma	0.009101223673406742
Total Dysregulated Proteins at Medium BPA concentrations	Thrombocytopenia	0.009101223673406742
Total Dysregulated Proteins at Medium BPA concentrations	Angioma	0.009101223673406742
Total Dysregulated Proteins at Medium BPA concentrations	Histiocytoid hemangioma	0.009101223673406742
Total Dysregulated Proteins at Medium BPA concentrations	Hemangioma, Intramuscular	0.009101223673406742
Total Dysregulated Proteins at Medium BPA concentrations	Heart Block	0.009101223673406742
Total Dysregulated Proteins at Medium BPA concentrations	Acute Lung Injury	0.009101223673406742
Total Dysregulated Proteins at Medium BPA concentrations	familial non-medullary thyroid cancer	0.009101223673406742
Total Dysregulated Proteins at Medium BPA concentrations	Other License Status	0.009101223673406742
Total Dysregulated Proteins at Medium BPA concentrations	Clinodactyly	0.009101223673406742
Total Dysregulated Proteins at Medium BPA concentrations	Polyarthritis, Juvenile, Rheumatoid Factor Negative	0.009233499317221403
Total Dysregulated Proteins at Medium BPA concentrations	Juvenile psoriatic arthritis	0.009233499317221403
Total Dysregulated Proteins at Medium BPA concentrations	Juvenile arthritis	0.009233499317221403
Total Dysregulated Proteins at Medium BPA concentrations	Polyarthritis, Juvenile, Rheumatoid Factor Positive	0.009233499317221403
Total Dysregulated Proteins at Medium BPA concentrations	Septic Shock	0.00950801684979148
Total Dysregulated Proteins at Medium BPA concentrations	Lymphoma, Non-Hodgkin	0.00950801684979148
Total Dysregulated Proteins at Medium BPA concentrations	Endotoxic shock	0.00950801684979148
Total Dysregulated Proteins at Medium BPA concentrations	Aqueductal Stenosis	0.00950801684979148
Total Dysregulated Proteins at Medium BPA concentrations	Respiratory Tract Diseases	0.00950801684979148
Total Dysregulated Proteins at Medium BPA concentrations	Abnormal corpus callosum morphology	0.00950801684979148
Total Dysregulated Proteins at Medium BPA concentrations	Ectodermal Dysplasia	0.00950801684979148
Total Dysregulated Proteins at Medium BPA concentrations	Arthritis	0.00950801684979148
Total Dysregulated Proteins at Medium BPA concentrations	Barrett Epithelium	0.00960870917511156
Total Dysregulated Proteins at Medium BPA concentrations	Direct Hyperbilirubinemia, Neonatal	0.00973341993292417
Total Dysregulated Proteins at Medium BPA concentrations	Neuromyelitis Optica	0.00973341993292417
Total Dysregulated Proteins at Medium BPA concentrations	Congenital myopathy (disorder)	0.00973341993292417
Total Dysregulated Proteins at Medium BPA concentrations	Schistosomiasis	0.00973341993292417
Total Dysregulated Proteins at Medium BPA concentrations	Triple Negative Breast Neoplasms	0.00973341993292417
Total Dysregulated Proteins at Medium BPA concentrations	Laryngeal Squamous Cell Carcinoma	0.00973341993292417
Total Dysregulated Proteins at Medium BPA concentrations	Secondary Open Angle Glaucoma	0.00973341993292417
Total Dysregulated Proteins at Medium BPA concentrations	Atrioventricular Septal Defect	0.00973341993292417
Total Dysregulated Proteins at Medium BPA concentrations	Chronobiology Disorders	0.00973341993292417
Total Dysregulated Proteins at Medium BPA concentrations	Indirect Hyperbilirubinemia, Neonatal	0.00973341993292417
Total Dysregulated Proteins at Medium BPA concentrations	Circadian Rhythm Disorders	0.00973341993292417
Total Dysregulated Proteins at Medium BPA concentrations	Psychogenic Inversion of Circadian Rhythm	0.00973341993292417
Total Dysregulated Proteins at Medium BPA concentrations	Testicular Germ Cell Tumor	0.00973341993292417
Total Dysregulated Proteins at Medium BPA concentrations	Corpus Luteum Cyst	0.00973341993292417
Total Dysregulated Proteins at Medium BPA concentrations	Hyperpigmentation	0.00973341993292417
Total Dysregulated Proteins at Medium BPA concentrations	Malignant lymphoma - lymphocytic, intermediate differentiation	0.00973341993292417
Total Dysregulated Proteins at Medium BPA concentrations	ATRIOVENTRICULAR CANAL DEFECT	0.00973341993292417
Total Dysregulated Proteins at Medium BPA concentrations	Squamous cell carcinoma of the hypopharynx	0.00973341993292417
Total Dysregulated Proteins at Medium BPA concentrations	Squamous cell carcinoma of lip	0.00973341993292417
Total Dysregulated Proteins at Medium BPA concentrations	Meniere Disease	0.00973341993292417
Total Dysregulated Proteins at Medium BPA concentrations	Ovarian Cysts	0.00973341993292417
Total Dysregulated Proteins at Medium BPA concentrations	Angelman Syndrome	0.00973341993292417
Total Dysregulated Proteins at Medium BPA concentrations	Severe Combined Immunodeficiency	0.00973341993292417
Total Dysregulated Proteins at Medium BPA concentrations	Osteitis Deformans	0.00973341993292417
Total Dysregulated Proteins at Medium BPA concentrations	Endogenous Hyperinsulinism	0.009826013935939827
Total Dysregulated Proteins at Medium BPA concentrations	Micronuclei, Chromosome-Defective	0.009826013935939827
Total Dysregulated Proteins at Medium BPA concentrations	Exogenous Hyperinsulinism	0.009826013935939827
Total Dysregulated Proteins at Medium BPA concentrations	Micronuclei, Genotoxicant-Induced	0.009826013935939827
Total Dysregulated Proteins at Medium BPA concentrations	Compensatory Hyperinsulinemia	0.009826013935939827
Total Dysregulated Proteins at Medium BPA concentrations	Motor retardation	0.010143069964075971
Total Dysregulated Proteins at Medium BPA concentrations	Neuroblastoma	0.010143069964075971
Total Dysregulated Proteins at Medium BPA concentrations	Carcinoma, Small Cell	0.010143069964075971
Total Dysregulated Proteins at Medium BPA concentrations	Focal Segmental Glomerulosclerosis, Not Otherwise Specified	0.010143069964075971
Total Dysregulated Proteins at Medium BPA concentrations	Lymphoma	0.010143069964075971
Total Dysregulated Proteins at Medium BPA concentrations	Hepatic Insufficiency	0.010143069964075971
Total Dysregulated Proteins at Medium BPA concentrations	Asymmetric crying face association	0.01055351531752074
Total Dysregulated Proteins at Medium BPA concentrations	Asthma, Occupational	0.01055351531752074
Total Dysregulated Proteins at Medium BPA concentrations	Lipidemias	0.010606688399590562
Total Dysregulated Proteins at Medium BPA concentrations	Leigh Disease	0.010606688399590562
Total Dysregulated Proteins at Medium BPA concentrations	MAJOR AFFECTIVE DISORDER 2	0.010606688399590562
Total Dysregulated Proteins at Medium BPA concentrations	Behcet Syndrome	0.011301070552797979
Total Dysregulated Proteins at Medium BPA concentrations	Hyperlipoproteinemia Type IIa	0.011301070552797979
Total Dysregulated Proteins at Medium BPA concentrations	Infection	0.011301070552797979
Total Dysregulated Proteins at Medium BPA concentrations	Abnormality of the eye	0.011301070552797979
Total Dysregulated Proteins at Medium BPA concentrations	Mental Depression	0.011405111187946293
Total Dysregulated Proteins at Medium BPA concentrations	Drug Allergy	0.011669985180003966
Total Dysregulated Proteins at Medium BPA concentrations	Leiomyosarcoma, Myxoid	0.011806150274135884
Total Dysregulated Proteins at Medium BPA concentrations	Kyphosis deformity of spine	0.011806150274135884
Total Dysregulated Proteins at Medium BPA concentrations	Adult Hodgkin Lymphoma	0.011806150274135884
Total Dysregulated Proteins at Medium BPA concentrations	Lymphocyte Rich Classical Hodgkin Lymphoma	0.011806150274135884
Total Dysregulated Proteins at Medium BPA concentrations	Leukemia, T-Cell	0.011806150274135884
Total Dysregulated Proteins at Medium BPA concentrations	Fetal Alcohol Spectrum Disorders	0.011806150274135884
Total Dysregulated Proteins at Medium BPA concentrations	Nodular Lymphocyte Predominant Hodgkin Lymphoma	0.011806150274135884
Total Dysregulated Proteins at Medium BPA concentrations	Phyllodes Tumor	0.011806150274135884
Total Dysregulated Proteins at Medium BPA concentrations	VENTRICULAR TACHYCARDIA, CATECHOLAMINERGIC POLYMORPHIC, 1 (disorder)	0.011806150274135884
Total Dysregulated Proteins at Medium BPA concentrations	Mixed Cellularity Hodgkin Lymphoma	0.011806150274135884
Total Dysregulated Proteins at Medium BPA concentrations	Mesenchymal Chondrosarcoma	0.011806150274135884
Total Dysregulated Proteins at Medium BPA concentrations	Malignant Cystosarcoma Phyllodes	0.011806150274135884
Total Dysregulated Proteins at Medium BPA concentrations	Leiomyosarcoma, Epithelioid	0.011806150274135884
Total Dysregulated Proteins at Medium BPA concentrations	Nephrosis	0.011806150274135884
Total Dysregulated Proteins at Medium BPA concentrations	Hodgkin lymphoma, lymphocyte depletion	0.011806150274135884
Total Dysregulated Proteins at Medium BPA concentrations	leiomyosarcoma	0.011806150274135884
Total Dysregulated Proteins at Medium BPA concentrations	Alcohol Use Disorder	0.01232420056148765
Total Dysregulated Proteins at Medium BPA concentrations	Diabetic Asymmetric Polyneuropathy	0.012352770298701259
Total Dysregulated Proteins at Medium BPA concentrations	Cortical Dysplasia	0.012352770298701259
Total Dysregulated Proteins at Medium BPA concentrations	MYELODYSPLASTIC SYNDROME	0.012352770298701259
Total Dysregulated Proteins at Medium BPA concentrations	Diabetic Neuralgia	0.012352770298701259
Total Dysregulated Proteins at Medium BPA concentrations	Diabetic Autonomic Neuropathy	0.012352770298701259
Total Dysregulated Proteins at Medium BPA concentrations	Asymmetric Diabetic Proximal Motor Neuropathy	0.012352770298701259
Total Dysregulated Proteins at Medium BPA concentrations	Diabetic Polyneuropathies	0.012352770298701259
Total Dysregulated Proteins at Medium BPA concentrations	Diabetic Amyotrophy	0.012352770298701259
Total Dysregulated Proteins at Medium BPA concentrations	Adenocarcinoma Of Esophagus	0.012352770298701259
Total Dysregulated Proteins at Medium BPA concentrations	Symmetric Diabetic Proximal Motor Neuropathy	0.012352770298701259
Total Dysregulated Proteins at Medium BPA concentrations	Diabetic Mononeuropathy	0.012352770298701259
Total Dysregulated Proteins at Medium BPA concentrations	Malformations of Cortical Development	0.012352770298701259
Total Dysregulated Proteins at Medium BPA concentrations	Noonan syndrome-like disorder with loose anagen hair	0.012541569261839832
Total Dysregulated Proteins at Medium BPA concentrations	Robinow Syndrome, Autosomal Dominant	0.012548338556025657
Total Dysregulated Proteins at Medium BPA concentrations	Squamous cell carcinoma of oropharynx	0.012548338556025657
Total Dysregulated Proteins at Medium BPA concentrations	Gastrointestinal Neoplasms	0.012548338556025657
Total Dysregulated Proteins at Medium BPA concentrations	Systemic onset juvenile chronic arthritis	0.012548338556025657
Total Dysregulated Proteins at Medium BPA concentrations	Hepatitis, Animal	0.012548338556025657
Total Dysregulated Proteins at Medium BPA concentrations	Adult Acute Lymphocytic Leukemia	0.012548338556025657
Total Dysregulated Proteins at Medium BPA concentrations	CATARACT, COPPOCK-LIKE	0.012548338556025657
Total Dysregulated Proteins at Medium BPA concentrations	Placenta Disorders	0.012548338556025657
Total Dysregulated Proteins at Medium BPA concentrations	Malignant neoplasm of gastrointestinal tract	0.012548338556025657
Total Dysregulated Proteins at Medium BPA concentrations	Cerebellar Dysmetria	0.012548338556025657
Total Dysregulated Proteins at Medium BPA concentrations	Systemic mastocytosis with associated clonal, hematologic non-mast-cell lineage disease	0.012548338556025657
Total Dysregulated Proteins at Medium BPA concentrations	Adiadochokinesis	0.012548338556025657
Total Dysregulated Proteins at Medium BPA concentrations	Arachnodactyly	0.012548338556025657
Total Dysregulated Proteins at Medium BPA concentrations	Hypermetria (finding)	0.012548338556025657
Total Dysregulated Proteins at Medium BPA concentrations	Diabetic Neuropathies	0.012548338556025657
Total Dysregulated Proteins at Medium BPA concentrations	Muscular atrophy, spinal, infantile chronic form	0.012548338556025657
Total Dysregulated Proteins at Medium BPA concentrations	Cerebellar Hemiataxia	0.012548338556025657
Total Dysregulated Proteins at Medium BPA concentrations	Diabetic Retinopathy	0.012548338556025657
Total Dysregulated Proteins at Medium BPA concentrations	Congenital Heart Defects	0.012640605655113591
Total Dysregulated Proteins at Medium BPA concentrations	Bone marrow hypocellularity	0.01271777442015362
Total Dysregulated Proteins at Medium BPA concentrations	Osteogenesis imperfecta type III (disorder)	0.012876036806349273
Total Dysregulated Proteins at Medium BPA concentrations	Fibrosarcoma	0.012876036806349273
Total Dysregulated Proteins at Medium BPA concentrations	Congenital hemihypertrophy	0.012876036806349273
Total Dysregulated Proteins at Medium BPA concentrations	DYSKERATOSIS CONGENITA, AUTOSOMAL DOMINANT	0.012876036806349273
Total Dysregulated Proteins at Medium BPA concentrations	Congenital Nephrogenic Diabetes Insipidus	0.012876036806349273
Total Dysregulated Proteins at Medium BPA concentrations	Retinal Neovascularization	0.012876036806349273
Total Dysregulated Proteins at Medium BPA concentrations	Acquired Nephrogenic Diabetes Insipidus	0.012876036806349273
Total Dysregulated Proteins at Medium BPA concentrations	Soft Tissue Neoplasms	0.012876036806349273
Total Dysregulated Proteins at Medium BPA concentrations	ADH-Resistant Diabetes Insipidus	0.012876036806349273
Total Dysregulated Proteins at Medium BPA concentrations	Bronchopulmonary Dysplasia	0.012876036806349273
Total Dysregulated Proteins at Medium BPA concentrations	Clear cell papillary renal cell carcinoma	0.012876036806349273
Total Dysregulated Proteins at Medium BPA concentrations	Ovarian clear cell carcinoma	0.012876036806349273
Total Dysregulated Proteins at Medium BPA concentrations	Vasculitis	0.012876036806349273
Total Dysregulated Proteins at Medium BPA concentrations	Micrognathism	0.012876036806349273
Total Dysregulated Proteins at Medium BPA concentrations	EPIDERMOLYSIS BULLOSA SIMPLEX, AUTOSOMAL RECESSIVE (disorder)	0.012876036806349273
Total Dysregulated Proteins at Medium BPA concentrations	Pulmonary arterial hypertension	0.012876036806349273
Total Dysregulated Proteins at Medium BPA concentrations	Malignant Squamous Cell Neoplasm	0.012876036806349273
Total Dysregulated Proteins at Medium BPA concentrations	Juvenile polyposis syndrome	0.012876036806349273
Total Dysregulated Proteins at Medium BPA concentrations	Growth delay	0.012876036806349273
Total Dysregulated Proteins at Medium BPA concentrations	Juvenile Polyposis Coli	0.012876036806349273
Total Dysregulated Proteins at Medium BPA concentrations	Squamous Cell Neoplasms	0.012876036806349273
Total Dysregulated Proteins at Medium BPA concentrations	Rheumatoid Arthritis, Systemic Juvenile	0.012876036806349273
Total Dysregulated Proteins at Medium BPA concentrations	JUVENILE POLYPOSIS OF STOMACH	0.012876036806349273
Total Dysregulated Proteins at Medium BPA concentrations	alcohol sensitivity	0.012876036806349273
Total Dysregulated Proteins at Medium BPA concentrations	Irido-corneo-trabecular dysgenesis (disorder)	0.012876036806349273
Total Dysregulated Proteins at Medium BPA concentrations	Dermatologic disorders	0.013147879360127046
Total Dysregulated Proteins at Medium BPA concentrations	Posterior subcapsular cataract	0.013609110555436248
Total Dysregulated Proteins at Medium BPA concentrations	Motor Skills Disorders	0.013609110555436248
Total Dysregulated Proteins at Medium BPA concentrations	Developmental Coordination Disorder	0.013609110555436248
Total Dysregulated Proteins at Medium BPA concentrations	Precursor Cell Lymphoblastic Leukemia Lymphoma	0.013609110555436248
Total Dysregulated Proteins at Medium BPA concentrations	Adult Oligodendroglioma	0.013640852079232076
Total Dysregulated Proteins at Medium BPA concentrations	Osteoporosis, Postmenopausal	0.013640852079232076
Total Dysregulated Proteins at Medium BPA concentrations	Mixed Oligodendroglioma-Ependymoma	0.013640852079232076
Total Dysregulated Proteins at Medium BPA concentrations	Nodding spasm	0.013640852079232076
Total Dysregulated Proteins at Medium BPA concentrations	Well Differentiated Oligodendroglioma	0.013640852079232076
Total Dysregulated Proteins at Medium BPA concentrations	Pleocytosis	0.013640852079232076
Total Dysregulated Proteins at Medium BPA concentrations	Childhood Oligodendroglioma	0.013640852079232076
Total Dysregulated Proteins at Medium BPA concentrations	Pleurisy	0.013640852079232076
Total Dysregulated Proteins at Medium BPA concentrations	Atherosclerosis	0.013640852079232076
Total Dysregulated Proteins at Medium BPA concentrations	Symptomatic Infantile Spasms	0.013640852079232076
Total Dysregulated Proteins at Medium BPA concentrations	spasmus nutans	0.013640852079232076
Total Dysregulated Proteins at Medium BPA concentrations	Bardet-Biedl Syndrome	0.013640852079232076
Total Dysregulated Proteins at Medium BPA concentrations	Salaam Seizures	0.013640852079232076
Total Dysregulated Proteins at Medium BPA concentrations	Cholangitis, Sclerosing	0.013640852079232076
Total Dysregulated Proteins at Medium BPA concentrations	Leukocytosis	0.013640852079232076
Total Dysregulated Proteins at Medium BPA concentrations	Hypsarrhythmia	0.013640852079232076
Total Dysregulated Proteins at Medium BPA concentrations	Diffuse Large B-Cell Lymphoma	0.013640852079232076
Total Dysregulated Proteins at Medium BPA concentrations	Jackknife Seizures	0.013640852079232076
Total Dysregulated Proteins at Medium BPA concentrations	Oligodendroblastoma	0.013640852079232076
Total Dysregulated Proteins at Medium BPA concentrations	Cryptogenic Infantile Spasms	0.013640852079232076
Total Dysregulated Proteins at Medium BPA concentrations	Paratuberculosis	0.013640852079232076
Total Dysregulated Proteins at Medium BPA concentrations	Congenital Abnormality	0.01395092969788327
Total Dysregulated Proteins at Medium BPA concentrations	Dyskinesia, Medication-Induced	0.015043636910581385
Total Dysregulated Proteins at Medium BPA concentrations	Autistic Disorder	0.015043636910581385
Total Dysregulated Proteins at Medium BPA concentrations	African Burkitt's lymphoma	0.015043636910581385
Total Dysregulated Proteins at Medium BPA concentrations	Burkitt Leukemia	0.015043636910581385
Total Dysregulated Proteins at Medium BPA concentrations	Myoclonic Epilepsy	0.016337898760598265
Total Dysregulated Proteins at Medium BPA concentrations	Fatty Liver	0.016337898760598265
Total Dysregulated Proteins at Medium BPA concentrations	22q11 partial monosomy syndrome	0.016337898760598265
Total Dysregulated Proteins at Medium BPA concentrations	Hematuria	0.016337898760598265
Total Dysregulated Proteins at Medium BPA concentrations	Human papilloma virus infection	0.016508666212009356
Total Dysregulated Proteins at Medium BPA concentrations	Aganglionosis, Rectosigmoid Colon	0.016508666212009356
Total Dysregulated Proteins at Medium BPA concentrations	Familial Tremor	0.016508666212009356
Total Dysregulated Proteins at Medium BPA concentrations	Myositis, Focal	0.016508666212009356
Total Dysregulated Proteins at Medium BPA concentrations	Cerebral Hypoxia-Ischemia	0.016508666212009356
Total Dysregulated Proteins at Medium BPA concentrations	EPIDERMOLYSIS BULLOSA, JUNCTIONAL, LOCALISATA VARIANT (disorder)	0.016508666212009356
Total Dysregulated Proteins at Medium BPA concentrations	Pseudodystonia	0.016508666212009356
Total Dysregulated Proteins at Medium BPA concentrations	Dysphoric mood	0.016508666212009356
Total Dysregulated Proteins at Medium BPA concentrations	Oxalosis	0.016508666212009356
Total Dysregulated Proteins at Medium BPA concentrations	Diffuse Scleroderma	0.016508666212009356
Total Dysregulated Proteins at Medium BPA concentrations	Hidradenitis suppurativa, familial	0.016508666212009356
Total Dysregulated Proteins at Medium BPA concentrations	Fuchs Endothelial Dystrophy	0.016508666212009356
Total Dysregulated Proteins at Medium BPA concentrations	ARTHROGRYPOSIS, DISTAL, TYPE 1	0.016508666212009356
Total Dysregulated Proteins at Medium BPA concentrations	Centronuclear myopathy	0.016508666212009356
Total Dysregulated Proteins at Medium BPA concentrations	Lymphopenia	0.016508666212009356
Total Dysregulated Proteins at Medium BPA concentrations	Butterfly-shaped pigmentary macular dystrophy	0.016508666212009356
Total Dysregulated Proteins at Medium BPA concentrations	Dystonia, Secondary	0.016508666212009356
Total Dysregulated Proteins at Medium BPA concentrations	Clear-cell metastatic renal cell carcinoma	0.016508666212009356
Total Dysregulated Proteins at Medium BPA concentrations	Diabetes	0.016508666212009356
Total Dysregulated Proteins at Medium BPA concentrations	leukemia	0.016508666212009356
Total Dysregulated Proteins at Medium BPA concentrations	Bleeding tendency	0.016508666212009356
Total Dysregulated Proteins at Medium BPA concentrations	Endometrioid carcinoma ovary	0.016508666212009356
Total Dysregulated Proteins at Medium BPA concentrations	Cerebral Hemorrhage	0.016508666212009356
Total Dysregulated Proteins at Medium BPA concentrations	Myocardial Stunning	0.016508666212009356
Total Dysregulated Proteins at Medium BPA concentrations	Chromosomal mosaicism due to mitotic instability	0.016508666212009356
Total Dysregulated Proteins at Medium BPA concentrations	Anoxic-Ischemic Encephalopathy	0.016508666212009356
Total Dysregulated Proteins at Medium BPA concentrations	Infectious Myositis	0.016508666212009356
Total Dysregulated Proteins at Medium BPA concentrations	Crohn Disease	0.016508666212009356
Total Dysregulated Proteins at Medium BPA concentrations	Pulmonary Hypertension	0.016508666212009356
Total Dysregulated Proteins at Medium BPA concentrations	Muscle hypotonia	0.016508666212009356
Total Dysregulated Proteins at Medium BPA concentrations	Familial Dystonia	0.016508666212009356
Total Dysregulated Proteins at Medium BPA concentrations	Bone Marrow Diseases	0.016508666212009356
Total Dysregulated Proteins at Medium BPA concentrations	Myositis	0.016508666212009356
Total Dysregulated Proteins at Medium BPA concentrations	Dystonia Disorders	0.016508666212009356
Total Dysregulated Proteins at Medium BPA concentrations	Epithelioid hemangioendothelioma	0.016508666212009356
Total Dysregulated Proteins at Medium BPA concentrations	Atypical Endometrial Hyperplasia	0.016508666212009356
Total Dysregulated Proteins at Medium BPA concentrations	cervical cancer	0.016508666212009356
Total Dysregulated Proteins at Medium BPA concentrations	Endometrial Hyperplasia	0.016508666212009356
Total Dysregulated Proteins at Medium BPA concentrations	22q11 Deletion Syndrome	0.016508666212009356
Total Dysregulated Proteins at Medium BPA concentrations	Fetal Growth Retardation	0.016508666212009356
Total Dysregulated Proteins at Medium BPA concentrations	Simple Endometrial Hyperplasia	0.016508666212009356
Total Dysregulated Proteins at Medium BPA concentrations	Seckel syndrome	0.016508666212009356
Total Dysregulated Proteins at Medium BPA concentrations	Hibernation, Myocardial	0.016508666212009356
Total Dysregulated Proteins at Medium BPA concentrations	Adult-Onset Idiopathic Focal Dystonias	0.016508666212009356
Total Dysregulated Proteins at Medium BPA concentrations	NEURONOPATHY, DISTAL HEREDITARY MOTOR, TYPE V	0.016508666212009356
Total Dysregulated Proteins at Medium BPA concentrations	Dystonias, Sporadic	0.016508666212009356
Total Dysregulated Proteins at Medium BPA concentrations	Autosomal Recessive Familial Dystonia	0.016508666212009356
Total Dysregulated Proteins at Medium BPA concentrations	Abnormality of nervous system morphology	0.016508666212009356
Total Dysregulated Proteins at Medium BPA concentrations	Carcinoma of Male Breast	0.016508666212009356
Total Dysregulated Proteins at Medium BPA concentrations	Submucous cleft palate	0.016508666212009356
Total Dysregulated Proteins at Medium BPA concentrations	Breast Neoplasms, Male	0.016508666212009356
Total Dysregulated Proteins at Medium BPA concentrations	Loeys-Dietz Aortic Aneurysm Syndrome	0.016508666212009356
Total Dysregulated Proteins at Medium BPA concentrations	Complex Endometrial Hyperplasia	0.016508666212009356
Total Dysregulated Proteins at Medium BPA concentrations	Lung Diseases, Obstructive	0.016508666212009356
Total Dysregulated Proteins at Medium BPA concentrations	Robinow Syndrome	0.016508666212009356
Total Dysregulated Proteins at Medium BPA concentrations	Stunned Myocardium	0.016508666212009356
Total Dysregulated Proteins at Medium BPA concentrations	Bowen's Disease	0.016508666212009356
Total Dysregulated Proteins at Medium BPA concentrations	Mood Disorders	0.016508666212009356
Total Dysregulated Proteins at Medium BPA concentrations	Hypoxic-Ischemic Encephalopathy	0.016508666212009356
Total Dysregulated Proteins at Medium BPA concentrations	Coronary Aneurysm	0.016508666212009356
Total Dysregulated Proteins at Medium BPA concentrations	Nevus, Keratinocytic, Nonepidermolytic	0.016508666212009356
Total Dysregulated Proteins at Medium BPA concentrations	Myositis, Proliferative	0.016508666212009356
Total Dysregulated Proteins at Medium BPA concentrations	Striate palmoplantar keratoderma	0.016508666212009356
Total Dysregulated Proteins at Medium BPA concentrations	Mosaic variegated aneuploidy syndrome 1	0.016508666212009356
Total Dysregulated Proteins at Medium BPA concentrations	Anoxia-Ischemia, Brain	0.016508666212009356
Total Dysregulated Proteins at Medium BPA concentrations	Wolf-Hirschhorn Syndrome	0.016508666212009356
Total Dysregulated Proteins at Medium BPA concentrations	Autoimmune Lymphoproliferative Syndrome Type 1, Autosomal Dominant	0.016508666212009356
Total Dysregulated Proteins at Medium BPA concentrations	Nephritis, Tubulointerstitial	0.016508666212009356
Total Dysregulated Proteins at Medium BPA concentrations	Megalanecephaly Polymicrogyria-Polydactyly Hydrocephalus Syndrome	0.016508666212009356
Total Dysregulated Proteins at Medium BPA concentrations	Thyroid cancer, follicular	0.016508666212009356
Total Dysregulated Proteins at Medium BPA concentrations	Patterned dystrophy of retinal pigment epithelium	0.016508666212009356
Total Dysregulated Proteins at Medium BPA concentrations	Craniosynostosis	0.016508666212009356
Total Dysregulated Proteins at Medium BPA concentrations	Idiopathic Inflammatory Myopathies	0.016508666212009356
Total Dysregulated Proteins at Medium BPA concentrations	Neointima	0.016508666212009356
Total Dysregulated Proteins at Medium BPA concentrations	Adult-Onset Dystonias	0.016508666212009356
Total Dysregulated Proteins at Medium BPA concentrations	Myopathies, Nemaline	0.016508666212009356
Total Dysregulated Proteins at Medium BPA concentrations	Adult-Onset Idiopathic Torsion Dystonias	0.016508666212009356
Total Dysregulated Proteins at Medium BPA concentrations	Warburton Anyane Yeboa syndrome	0.016508666212009356
Total Dysregulated Proteins at Medium BPA concentrations	Acute Kidney Tubular Necrosis	0.016508666212009356
Total Dysregulated Proteins at Medium BPA concentrations	Lymphohistiocytosis, Hemophagocytic	0.016508666212009356
Total Dysregulated Proteins at Medium BPA concentrations	Epidermolysis Bullosa Progressiva	0.016508666212009356
Total Dysregulated Proteins at Medium BPA concentrations	Anoxia-Ischemia, Cerebral	0.016508666212009356
Total Dysregulated Proteins at Medium BPA concentrations	Neurodevelopmental delay	0.016508666212009356
Total Dysregulated Proteins at Medium BPA concentrations	Dystonia, Primary	0.016508666212009356
Total Dysregulated Proteins at Medium BPA concentrations	Agenesis of corpus callosum	0.016508666212009356
Total Dysregulated Proteins at Medium BPA concentrations	Childhood Onset Dystonias	0.016508666212009356
Total Dysregulated Proteins at Medium BPA concentrations	Autosomal Dominant Familial Dystonia	0.016508666212009356
Total Dysregulated Proteins at Medium BPA concentrations	Abruptio Placentae	0.016508666212009356
Total Dysregulated Proteins at Medium BPA concentrations	Seminoma	0.016508666212009356
Total Dysregulated Proteins at Medium BPA concentrations	Hereditary Autoinflammatory Diseases	0.016508666212009356
Total Dysregulated Proteins at Medium BPA concentrations	Aortic Aneurysm, Abdominal	0.016508666212009356
Total Dysregulated Proteins at Medium BPA concentrations	Enchondromatosis	0.016508666212009356
Total Dysregulated Proteins at Medium BPA concentrations	Anasarca	0.018440825629490457
Total Dysregulated Proteins at Medium BPA concentrations	Dyslipoproteinemias	0.01883039785171415
Total Dysregulated Proteins at Medium BPA concentrations	Dyslipidemias	0.01883039785171415
Total Dysregulated Proteins at Medium BPA concentrations	Status Epilepticus	0.01883039785171415
Total Dysregulated Proteins at Medium BPA concentrations	Amino Acid Metabolism, Inborn Errors	0.019396671624311444
Total Dysregulated Proteins at Medium BPA concentrations	Sjogren's Syndrome	0.019396671624311444
Total Dysregulated Proteins at Medium BPA concentrations	Congenital musculoskeletal anomalies	0.019804674407898314
Total Dysregulated Proteins at Medium BPA concentrations	Conn Syndrome	0.019804674407898314
Total Dysregulated Proteins at Medium BPA concentrations	Hyperaldosteronism	0.019804674407898314
Total Dysregulated Proteins at Medium BPA concentrations	Heymann Nephritis	0.019804674407898314
Total Dysregulated Proteins at Medium BPA concentrations	Pathologic Neovascularization	0.019804674407898314
Total Dysregulated Proteins at Medium BPA concentrations	Hyperlipidemia	0.019804674407898314
Total Dysregulated Proteins at Medium BPA concentrations	Congenital Hydrocephalus	0.019804674407898314
Total Dysregulated Proteins at Medium BPA concentrations	Abnormality of vision	0.019804674407898314
Total Dysregulated Proteins at Medium BPA concentrations	Bare Lymphocyte Syndrome	0.019804674407898314
Total Dysregulated Proteins at Medium BPA concentrations	Scleroderma, Limited	0.019804674407898314
Total Dysregulated Proteins at Medium BPA concentrations	Pancreatic Diseases	0.019804674407898314
Total Dysregulated Proteins at Medium BPA concentrations	Idiopathic Membranous Glomerulonephritis	0.019804674407898314
Total Dysregulated Proteins at Medium BPA concentrations	CREST Syndrome	0.019804674407898314
Total Dysregulated Proteins at Medium BPA concentrations	Coxsackievirus Infections	0.019804674407898314
Total Dysregulated Proteins at Medium BPA concentrations	Hematological Disease	0.020481506446999725
Total Dysregulated Proteins at Medium BPA concentrations	Myoclonic Encephalopathy	0.020481506446999725
Total Dysregulated Proteins at Medium BPA concentrations	Agammaglobulinemia, non-Bruton type	0.020481506446999725
Total Dysregulated Proteins at Medium BPA concentrations	Benign Infantile Myoclonic Epilepsy	0.020481506446999725
Total Dysregulated Proteins at Medium BPA concentrations	Early Childhood Epilepsy, Myoclonic	0.020481506446999725
Total Dysregulated Proteins at Medium BPA concentrations	Symptomatic Myoclonic Epilepsy	0.020481506446999725
Total Dysregulated Proteins at Medium BPA concentrations	Scoliosis, unspecified	0.020481506446999725
Total Dysregulated Proteins at Medium BPA concentrations	Inflammatory Bowel Diseases	0.020481506446999725
[truncated: 23,163 more rows]
